# Supplementary material for: In the Alphaproteobacterium Hyphomicrobium denitrificans SoxR Serves a Sulfane Sulfur-Responsive Repressor of Sulfur Oxidation
Source: MDPI journal article supplement (doi:10.3390/antiox12081620), 2023-08-16
Supplement: s1 [file s1]

**Figure S1. Mass spectra for SoxR and variants with Cys-Ser exchanges**

**SoxR wildtype**

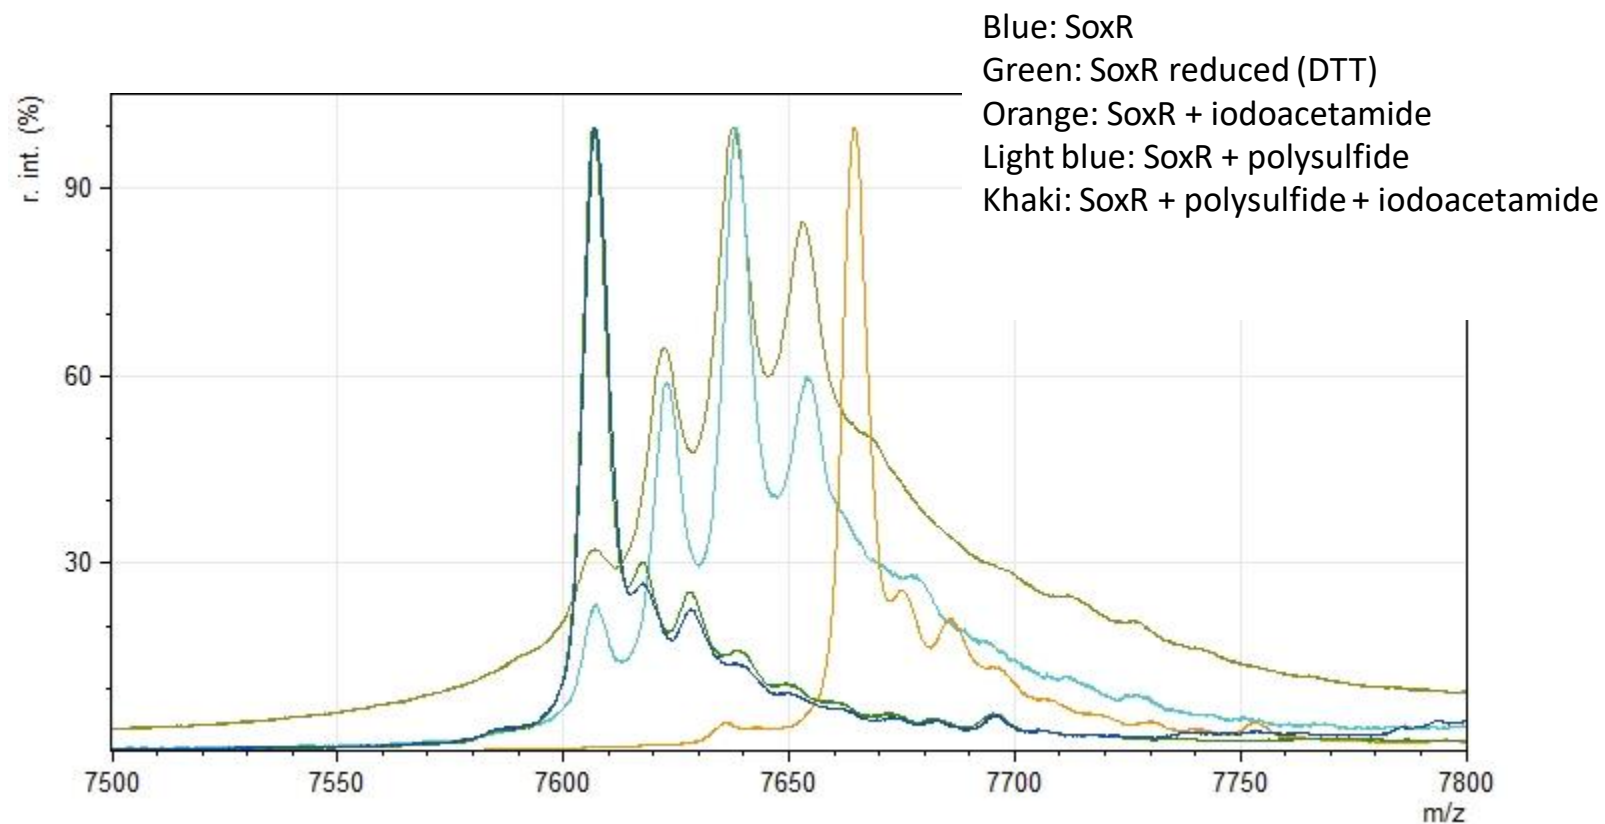

Masses are shown for the  $mz/2$  species. Mass spectra obtained for the  $\text{CuCl}_2$  oxidized protein were almost identical to those for the as isolated protein and are not shown for clarity.

## SoxR Cys<sup>50</sup>Ser

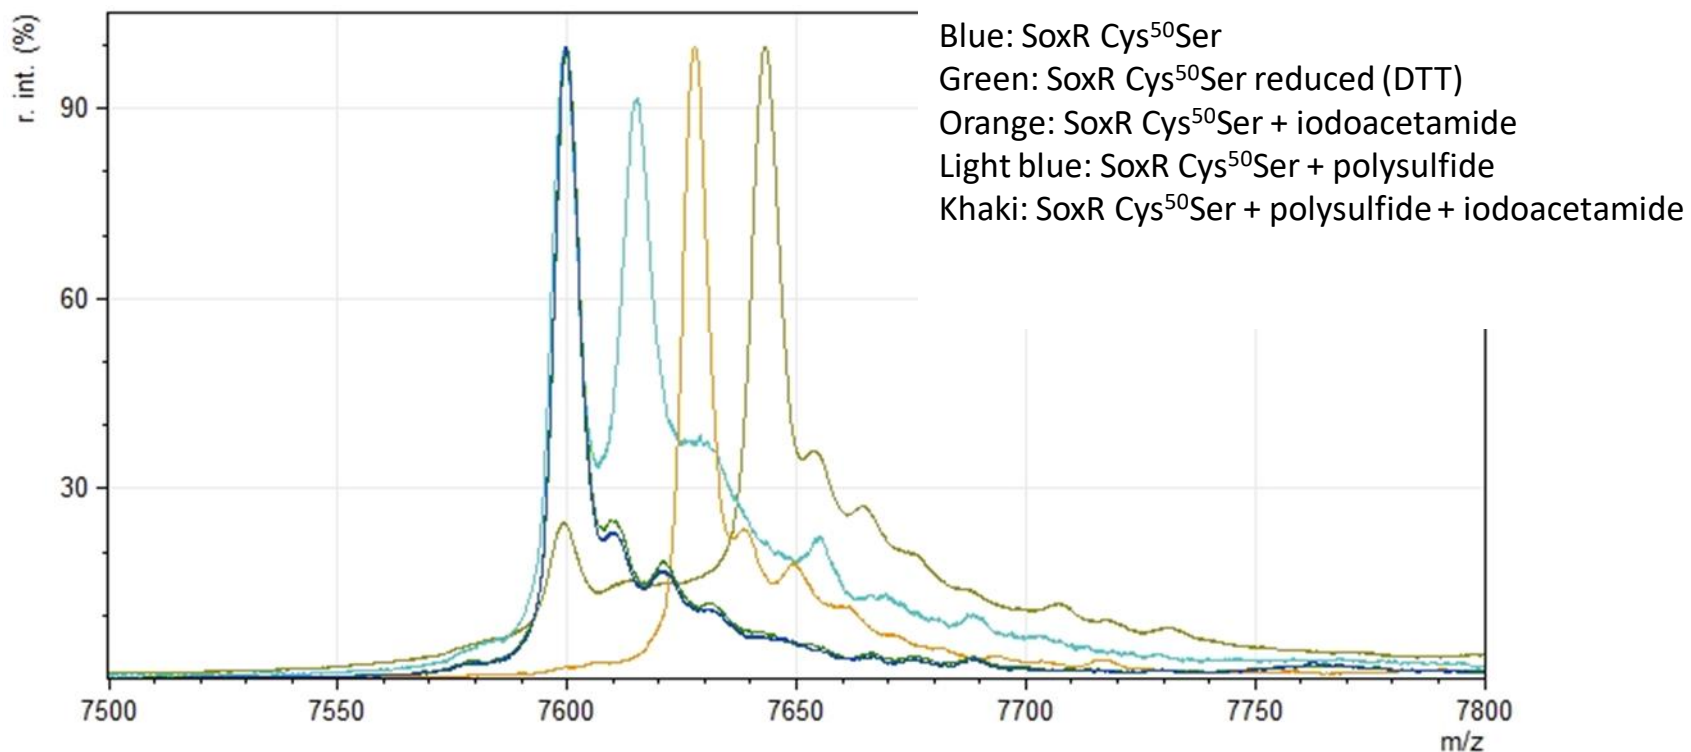

Masses are shown for the  $mz/2$  species. Mass spectra obtained for the  $\text{CuCl}_2$  oxidized protein were almost identical to those for the as isolated protein and are not shown for clarity.

## SoxR Cys<sup>116</sup>Ser

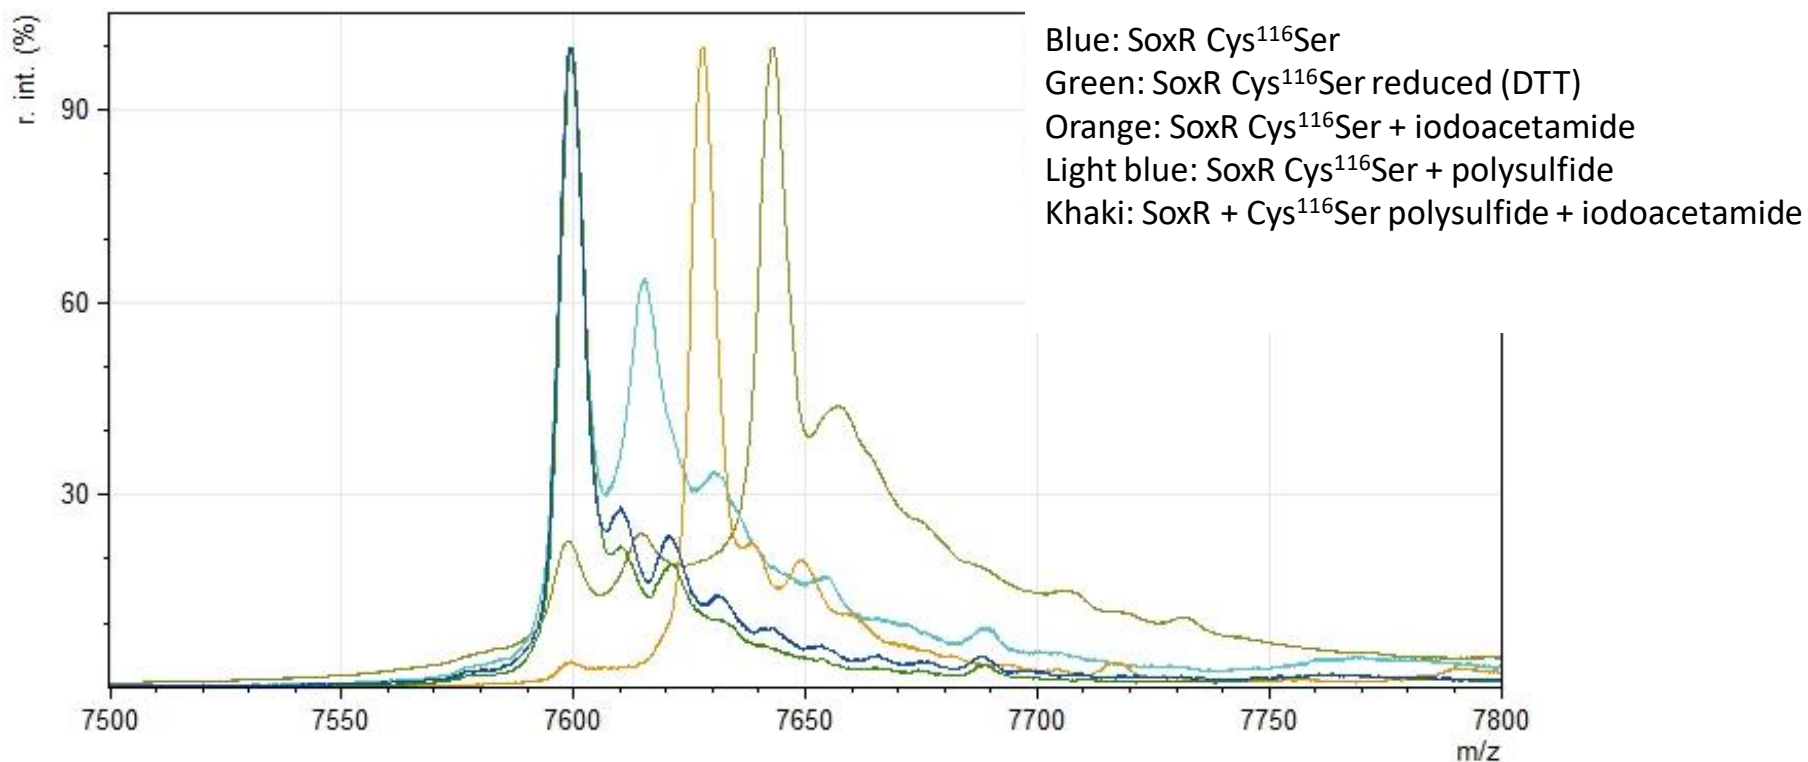

Masses are shown for the  $mz/2$  species. Mass spectra obtained for the  $\text{CuCl}_2$  oxidized protein were almost identical to those for the as isolated protein and are not shown for clarity.

## SoxR Cys<sup>50</sup>Ser Cys<sup>116</sup>Ser

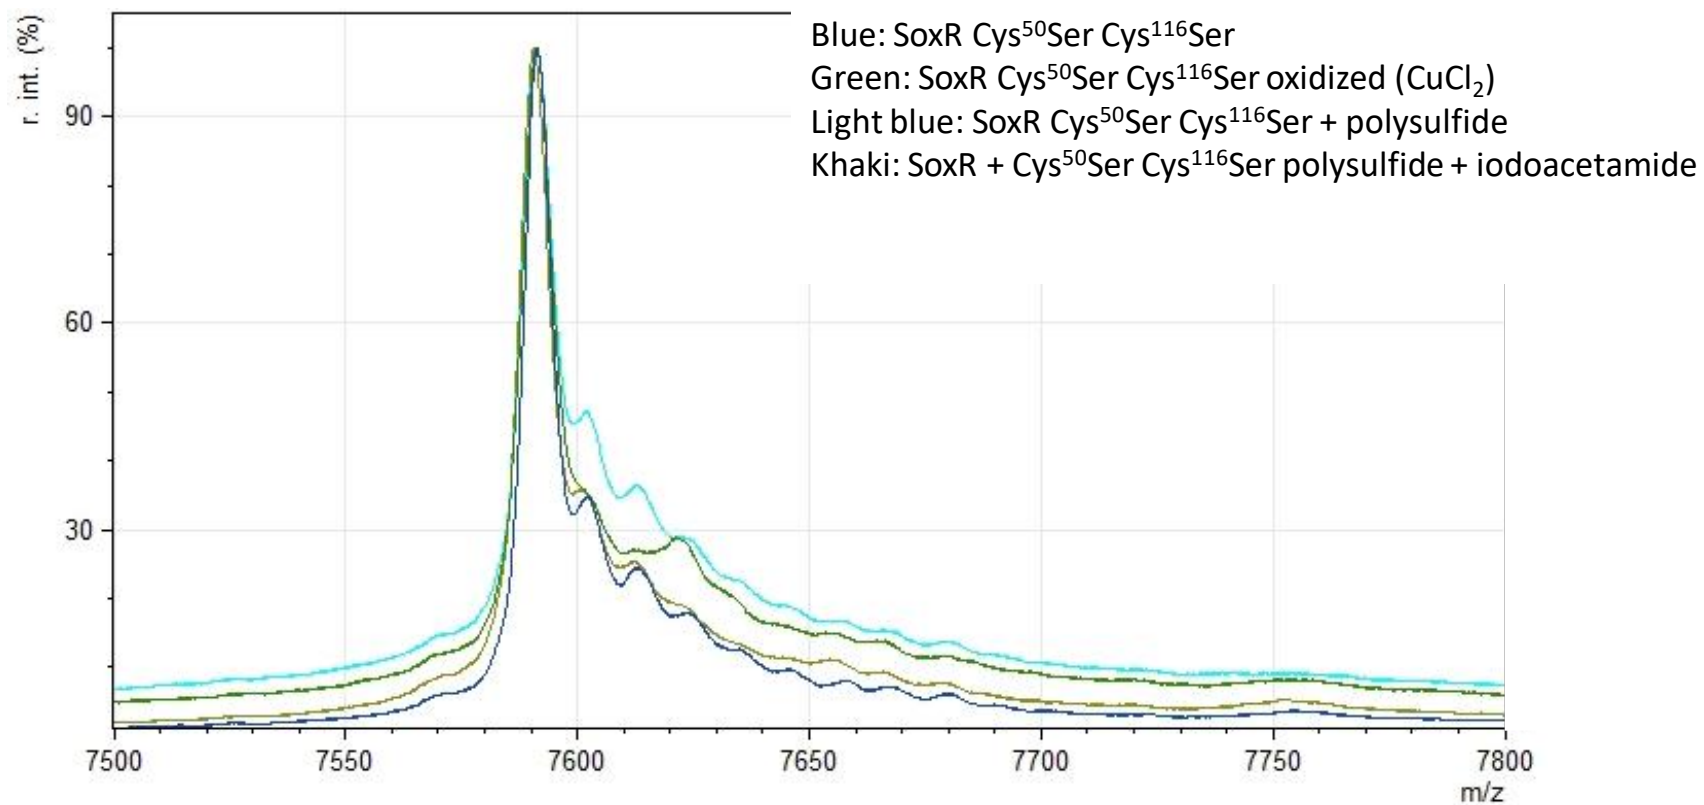

Masses are shown for the  $mz/2$  species.
