# Supplementary material for: In the Alphaproteobacterium Hyphomicrobium denitrificans SoxR Serves a Sulfane Sulfur-Responsive Repressor of Sulfur Oxidation
Source: Antioxidants (Basel). 2023 Aug 16;12(8):1620. doi: 10.3390/antiox12081620 (PMC10451225; doi:10.3390/antiox12081620)
Supplement: Supplementary file 1 [file antioxidants-12-01620-s001.zip › Table S2 Distribution of Sox systems and SoxR.xlsx]

## Sheet: Phylum_absolute_count
Phylum	Number of species in the phylum	Sox system	Complete Sox system	Truncated Sox system	Sox system, plus SoxR	Complete Sox system, no SoxR	Complete Sox system, plus SoxR	Truncated Sox system, no SoxR	Truncated Sox system, plus SoxR
4484-113	2	0	0	0	0	0	0	0	0
4572-55	2	0	0	0	0	0	0	0	0
AABM5-125-24	21	0	0	0	0	0	0	0	0
ARS69	1	0	0	0	0	0	0	0	0
Abyssubacteria	3	0	0	0	0	0	0	0	0
Acidobacteriota	873	0	0	0	0	0	0	0	0
Actinobacteriota	7328	0	0	0	0	0	0	0	0
Aerophobota	9	0	0	0	0	0	0	0	0
Aquificota	76	41	0	41	0	0	0	41	0
Armatimonadota	139	0	0	0	0	0	0	0	0
Atribacterota	37	0	0	0	0	0	0	0	0
Aureabacteria	2	0	0	0	0	0	0	0	0
B130-G9	2	0	0	0	0	0	0	0	0
BMS3Abin14	5	0	0	0	0	0	0	0	0
BS750m-G25	1	0	0	0	0	0	0	0	0
BS750m-G34	1	0	0	0	0	0	0	0	0
Bacteroidota	8588	19	0	19	0	0	0	19	0
Bdellovibrionota	224	0	0	0	0	0	0	0	0
Bdellovibrionota_C	17	0	0	0	0	0	0	0	0
Bdellovibrionota_E	9	0	0	0	0	0	0	0	0
Bipolaricaulota	46	0	0	0	0	0	0	0	0
CAIJMQ01	3	0	0	0	0	0	0	0	0
CG03	13	0	0	0	0	0	0	0	0
CG2-30-53-67	2	1	0	1	0	0	0	1	0
CG2-30-70-394	1	0	0	0	0	0	0	0	0
CLD3	6	0	0	0	0	0	0	0	0
CSP1-3	21	0	0	0	0	0	0	0	0
CSSED10-310	8	0	0	0	0	0	0	0	0
Caldisericota	26	0	0	0	0	0	0	0	0
Calditrichota	18	0	0	0	0	0	0	0	0
Calescibacterota	4	0	0	0	0	0	0	0	0
Campylobacterota	550	169	128	41	0	128	0	41	0
Chlamydiota	171	0	0	0	0	0	0	0	0
Chloroflexota	1387	0	0	0	0	0	0	0	0
Chrysiogenota	3	0	0	0	0	0	0	0	0
Cloacimonadota	60	0	0	0	0	0	0	0	0
Coprothermobacterota	6	0	0	0	0	0	0	0	0
Cyanobacteria	1372	0	0	0	0	0	0	0	0
DRYD01	2	0	0	0	0	0	0	0	0
DTU030	11	0	0	0	0	0	0	0	0
DUMJ01	4	0	0	0	0	0	0	0	0
Deferribacterota	19	0	0	0	0	0	0	0	0
Deinococcota	144	35	33	2	0	33	0	2	0
Delongbacteria	11	0	0	0	0	0	0	0	0
Dependentiae	61	0	0	0	0	0	0	0	0
Desantisbacteria	3	0	0	0	0	0	0	0	0
Desulfobacterota	939	6	0	6	0	0	0	6	0
Desulfobacterota_B	66	0	0	0	0	0	0	0	0
Desulfobacterota_C	16	0	0	0	0	0	0	0	0
Desulfobacterota_D	26	0	0	0	0	0	0	0	0
Desulfobacterota_E	21	0	0	0	0	0	0	0	0
Desulfobacterota_G	30	0	0	0	0	0	0	0	0
Desulfobacterota_I	236	0	0	0	0	0	0	0	0
Dictyoglomota	5	0	0	0	0	0	0	0	0
Dormibacterota	88	0	0	0	0	0	0	0	0
Edwardsbacteria	7	0	0	0	0	0	0	0	0
Eisenbacteria	31	0	0	0	0	0	0	0	0
Elusimicrobiota	189	0	0	0	0	0	0	0	0
Eremiobacterota	81	3	3	0	0	3	0	0	0
FCPU426	5	0	0	0	0	0	0	0	0
FEN-1099	2	0	0	0	0	0	0	0	0
Fermentibacterota	15	0	0	0	0	0	0	0	0
Fibrobacterota	120	0	0	0	0	0	0	0	0
Firestonebacteria	8	0	0	0	0	0	0	0	0
Firmicutes	4216	0	0	0	0	0	0	0	0
Firmicutes_A	8243	0	0	0	0	0	0	0	0
Firmicutes_B	323	0	0	0	0	0	0	0	0
Firmicutes_C	395	0	0	0	0	0	0	0	0
Firmicutes_D	104	0	0	0	0	0	0	0	0
Firmicutes_E	65	0	0	0	0	0	0	0	0
Firmicutes_F	49	0	0	0	0	0	0	0	0
Firmicutes_G	131	0	0	0	0	0	0	0	0
Firmicutes_H	17	0	0	0	0	0	0	0	0
Fusobacteriota	96	0	0	0	0	0	0	0	0
GCA-001730085	1	0	0	0	0	0	0	0	0
Gemmatimonadota	237	0	0	0	0	0	0	0	0
Gemmatimonadota_A	1	0	0	0	0	0	0	0	0
Goldbacteria	8	0	0	0	0	0	0	0	0
HKB111	2	0	0	0	0	0	0	0	0
Hydrogenedentota	42	0	0	0	0	0	0	0	0
J088	1	0	0	0	0	0	0	0	0
JAAXHH01	7	0	0	0	0	0	0	0	0
JABDJQ01	3	0	0	0	0	0	0	0	0
JABMQX01	2	0	0	0	0	0	0	0	0
JACIXR01	2	0	0	0	0	0	0	0	0
JACPQY01	2	0	0	0	0	0	0	0	0
JACPSX01	1	0	0	0	0	0	0	0	0
JACPUC01	1	0	0	0	0	0	0	0	0
JACPWU01	2	0	0	0	0	0	0	0	0
JACQOV01	1	0	0	0	0	0	0	0	0
JACRDZ01	2	0	0	0	0	0	0	0	0
JADJOY01	1	0	0	0	0	0	0	0	0
JAFGBW01	2	0	0	0	0	0	0	0	0
JAFGND01	1	0	0	0	0	0	0	0	0
JAFGOL01	1	0	0	0	0	0	0	0	0
JAGOBX01	1	0	0	0	0	0	0	0	0
JAGOEH01	1	0	0	0	0	0	0	0	0
JAHJDO01	1	0	0	0	0	0	0	0	0
JdFR-76	5	0	0	0	0	0	0	0	0
KSB1	36	0	0	0	0	0	0	0	0
Krumholzibacteriota	35	0	0	0	0	0	0	0	0
Latescibacterota	37	0	0	0	0	0	0	0	0
Lindowbacteria	2	0	0	0	0	0	0	0	0
Margulisbacteria	54	0	0	0	0	0	0	0	0
Marinisomatota	186	0	0	0	0	0	0	0	0
Mcinerneyibacteriota	3	0	0	0	0	0	0	0	0
Methylomirabilota	76	15	0	15	0	0	0	15	0
Moduliflexota	4	0	0	0	0	0	0	0	0
Muirbacteria	1	0	0	0	0	0	0	0	0
Myxococcota	393	4	4	0	0	4	0	0	0
Myxococcota_A	72	0	0	0	0	0	0	0	0
NPL-UPA2	2	0	0	0	0	0	0	0	0
Nitrospinota	60	1	0	1	0	0	0	1	0
Nitrospinota_B	2	0	0	0	0	0	0	0	0
Nitrospirota	314	8	0	8	0	0	0	8	0
Nitrospirota_A	5	0	0	0	0	0	0	0	0
OLB16	7	0	0	0	0	0	0	0	0
Omnitrophota	282	0	0	0	0	0	0	0	0
PUNC01	2	0	0	0	0	0	0	0	0
Patescibacteria	2485	0	0	0	0	0	0	0	0
Planctomycetota	1071	2	0	2	0	0	0	2	0
Poribacteria	34	0	0	0	0	0	0	0	0
Proteobacteria	17350	3354	2015	1264	1583	530	1485	1241	98
QNDG01	11	0	0	0	0	0	0	0	0
RBG-13-61-14	5	0	0	0	0	0	0	0	0
RBG-13-66-14	5	0	0	0	0	0	0	0	0
RUG730	1	0	0	0	0	0	0	0	0
Ratteibacteria	9	0	0	0	0	0	0	0	0
Riflebacteria	22	0	0	0	0	0	0	0	0
SAR324	40	2	1	1	0	1	0	0	0
SLNR01	1	0	0	0	0	0	0	0	0
SM23-31	2	0	0	0	0	0	0	0	0
SZUA-182	5	0	0	0	0	0	0	0	0
SZUA-79	6	0	0	0	0	0	0	0	0
Schekmanbacteria	4	0	0	0	0	0	0	0	0
SpSt-318	1	0	0	0	0	0	0	0	0
Spirochaetota	695	1	0	1	0	0	0	1	0
Sumerlaeota	19	0	0	0	0	0	0	0	0
Synergistota	132	0	0	0	0	0	0	0	0
T1SED10-198M	1	0	0	0	0	0	0	0	0
T1Sed10-126	2	0	0	0	0	0	0	0	0
TA06	2	0	0	0	0	0	0	0	0
TA06_A	1	0	0	0	0	0	0	0	0
Tectomicrobia	4	2	2	0	0	2	0	0	0
Thermodesulfobiota	3	0	0	0	0	0	0	0	0
Thermosulfidibacterota	6	0	0	0	0	0	0	0	0
Thermotogota	83	0	0	0	0	0	0	0	0
UBA10199	33	0	0	0	0	0	0	0	0
UBA1439	1	0	0	0	0	0	0	0	0
UBA2233	2	0	0	0	0	0	0	0	0
UBA3054	13	0	0	0	0	0	0	0	0
UBA6262	5	0	0	0	0	0	0	0	0
UBA6266	2	0	0	0	0	0	0	0	0
UBA8248	10	0	0	0	0	0	0	0	0
UBA8481	2	0	0	0	0	0	0	0	0
UBA9089	7	0	0	0	0	0	0	0	0
UBP13	1	0	0	0	0	0	0	0	0
UBP14	8	0	0	0	0	0	0	0	0
UBP15	3	0	0	0	0	0	0	0	0
UBP17	7	0	0	0	0	0	0	0	0
UBP18	3	0	0	0	0	0	0	0	0
UBP4	1	0	0	0	0	0	0	0	0
UBP6	18	0	0	0	0	0	0	0	0
UBP7	3	0	0	0	0	0	0	0	0
VGIX01	3	0	0	0	0	0	0	0	0
Verrucomicrobiota	1325	2	1	1	0	1	0	1	0
WOR-3	77	0	0	0	0	0	0	0	0
Wallbacteria	3	0	0	0	0	0	0	0	0
Zixibacteria	47	0	0	0	0	0	0	0	0
						0	0	0	0

## Sheet: Sox in Alpha- and Gammaproteoba
Table S2. Distribution of Sox systems and SoxR
Class	Order	Family	Complete Sox system, plus SoxR	Complete Sox system, no SoxR	Truncated Sox system, plus SoxR	Truncated Sox system, no SoxR
Alphaproteobacteria	Acetobacterales	Acetobacteraceae	4	18	0	22
	Azospirillales	Azospirillaceae	4	9	0	7
	ATCC43930	Stellaceae	0	0	0	6
	CACIAM-22H2	CACIAM-22H2	2	3	0	5
	Caulobacterales	Hyphomonadaceae	0	0	0	22
	DSM16000	Inquilinaceae	0	0	0	1
	Ferrovibrionales	Ferrovibrionaceae	0	0	0	3
	Kiloniellales	Kiloniellaceae	5	0	0	0
		DSM-21159	0	0	0	3
	Minwuiales	Minwuiaceae	2	0	0	0
	Oceanibaculales	Oceanibaculaceae	0	0	0	2
	Reyranellales	Reyranellaceae	3	2	0	31
	Rhizobiales	Rhizobiaceae	101	5	3	10
		Aestuariivirgaceae	2	0	0	2
		Afifellaceae	2	0	0	0
		Amorphaceae	1	0	0	0
		Ancalomicrobiaceae	2	2	0	0
		Beijerinckiaceae	51	6	2	34
		Cohaesibacteraceae	3	1	0	0
		Hyphomicrobiaceae	10	4	3	6
		Methylopilaceae	3	0	0	1
		Phreatobacteraceae	5	0	0	0
		Pleomorphomonadaceae	1	0	0	0
		Rhodobiaceae	0	0	2	0
		Rhodomicrobiaceae	1	0	0	0
		Stappiaceae	49	1	1	0
		Tepidamorphaceae	2	0	0	0
		Xanthobacteraceae	149	29	3	122
	Rhodobacterales	Rhodobacteraceae	535	61	40	20
	Rhodospirillales	Magnetovibrionaceae	0	0	3	3
		Magnetospiraceae	0	0	0	1
		Magnetospirillaceae	0	0	0	11
		Rhodospirillaceae	0	1	0	7
		Terasakiellaceae	0	4	0	0
		Thalassospiraceae	7	0	0	0
	Thalassobaculales	Thalassobaculaceae	7	0	0	0
Gammaproteobacteria
	Acidiferrobacterales	Acidiferrobacteraceae	0	0	0	3
		Surlfurifustaceae	0	0	0	6
	Acidithiobacillales	Acidithiobacillaceae	0	0	0	9
		Thermothiobacillaceae	0	0	0	1
	AKS1	AKS1	0	0	0	1
	Burkholderiales	Burkholderiaceae	446	180	10	189
		Casimicrobiaceae	10	1	2	10
		Gallionellaceae	0	0	0	21
		Rhodocyclaceae	57	24	0	55
		Sulfuricellaceae	0	0	0	14
		Thiobacillaceae	0	0	0	34
	Chromatiales	Chromatiaceaeae	0	0	0	57
		Ectothiorhodospiraceae	0	0	0	12
		Sedimenticolaceae	0	0	1	21
	DSM-100275	DSM-100275	0	0	0	1
	DSM-19610	DSM-19610	0	0	0	4
		Usitatibacteraceae	10	0	2	2
	Granulosicoccales	Granulosicoccales	2	0	0	1
	Methylococcales	Methylomonadaceae	0	0	0	22
		Magnetococcaceae	0	0	0	2
	Nevskiales	Nevskiaceae	0	6	0	1
	PS1	Thioglobaceae	0	0	0	26
	Pseudomonadales	Halieaceae	4	11	0	5
		Natronospirillaceae	0	2	0	0
		Nitrincolaceae	0	29	0	4
		Porticoccaceae	0		0	3
	Steroidobacterales	Steroidobacteraceae	0	0	0	3
	Thiohalobacterales	Thiohalomonadacea	0	0	0	7
		Thiohalobacteraceae	0	0	0	3
		Thioghalorhadaceae	0	0	0	1
		Thiomicrospiraceae	0	0	0	45
	Thiotrichales	Thiotrichaceae	0	0	0	23
	UBA6492	UBA6492	0	0	0	1
	Xanthomonadales	Rhodanobacteraceae	0	5	0	0
		Xanthamonadaceae	0	3	0	0

## Sheet: Complete Sox, no SoxR
Species containing the complete Sox system without SoxR
Accession_Prokaryotic domain	GTDB taxonomy_phylum_class_order_family_genus_species										RS: NCBI RefSeq database
RS_GCF_013177675_Bacteria	Campylobacterota_Campylobacteria_Campylobacterales_Arcobacteraceae_Aliarcobacter_Aliarcobacter-acticola										GB: NCBI GeneBank database
RS_GCF_013177635_Bacteria	Campylobacterota_Campylobacteria_Campylobacterales_Arcobacteraceae_Aliarcobacter_Aliarcobacter-aquimarinus
RS_GCF_900187115_Bacteria	Campylobacterota_Campylobacteria_Campylobacterales_Arcobacteraceae_Aliarcobacter_Aliarcobacter-butzleri
RS_GCF_013372265_Bacteria	Campylobacterota_Campylobacteria_Campylobacterales_Arcobacteraceae_Aliarcobacter_Aliarcobacter-cibarius
RS_GCF_013201935_Bacteria	Campylobacterota_Campylobacteria_Campylobacterales_Arcobacteraceae_Aliarcobacter_Aliarcobacter-cloacae
RS_GCF_003660105_Bacteria	Campylobacterota_Campylobacteria_Campylobacterales_Arcobacteraceae_Aliarcobacter_Aliarcobacter-cryaerophilus
RS_GCF_014352935_Bacteria	Campylobacterota_Campylobacteria_Campylobacterales_Arcobacteraceae_Aliarcobacter_Aliarcobacter-cryaerophilus_A
RS_GCF_002993025_Bacteria	Campylobacterota_Campylobacteria_Campylobacterales_Arcobacteraceae_Aliarcobacter_Aliarcobacter-cryaerophilus_B
RS_GCF_013201725_Bacteria	Campylobacterota_Campylobacteria_Campylobacterales_Arcobacteraceae_Aliarcobacter_Aliarcobacter-defluvii
RS_GCF_003544915_Bacteria	Campylobacterota_Campylobacteria_Campylobacterales_Arcobacteraceae_Aliarcobacter_Aliarcobacter-ellisii
RS_GCF_013201705_Bacteria	Campylobacterota_Campylobacteria_Campylobacterales_Arcobacteraceae_Aliarcobacter_Aliarcobacter-faecis
RS_GCF_013201625_Bacteria	Campylobacterota_Campylobacteria_Campylobacterales_Arcobacteraceae_Aliarcobacter_Aliarcobacter-lanthieri
RS_GCF_004214795_Bacteria	Campylobacterota_Campylobacteria_Campylobacterales_Arcobacteraceae_Aliarcobacter_Aliarcobacter-pacificus
RS_GCF_004299785_Bacteria	Campylobacterota_Campylobacteria_Campylobacterales_Arcobacteraceae_Aliarcobacter_Aliarcobacter-porcinus
RS_GCF_003544835_Bacteria	Campylobacterota_Campylobacteria_Campylobacterales_Arcobacteraceae_Aliarcobacter_Aliarcobacter-skirrowii
GB_GCA_003316695_Bacteria	Campylobacterota_Campylobacteria_Campylobacterales_Arcobacteraceae_Aliarcobacter_Aliarcobacter-sp003316695
GB_GCA_017995775_Bacteria	Campylobacterota_Campylobacteria_Campylobacterales_Arcobacteraceae_Aliarcobacter_Aliarcobacter-sp017995775
GB_GCA_017996075_Bacteria	Campylobacterota_Campylobacteria_Campylobacterales_Arcobacteraceae_Aliarcobacter_Aliarcobacter-sp017996075
RS_GCF_003544815_Bacteria	Campylobacterota_Campylobacteria_Campylobacterales_Arcobacteraceae_Aliarcobacter_Aliarcobacter-suis
RS_GCF_004214815_Bacteria	Campylobacterota_Campylobacteria_Campylobacterales_Arcobacteraceae_Aliarcobacter_Aliarcobacter-thereius
RS_GCF_003355515_Bacteria	Campylobacterota_Campylobacteria_Campylobacterales_Arcobacteraceae_Aliarcobacter_Aliarcobacter-trophiarum
RS_GCF_013201665_Bacteria	Campylobacterota_Campylobacteria_Campylobacterales_Arcobacteraceae_Aliarcobacter_Aliarcobacter-venerupis
GB_GCA_001655195_Bacteria	Campylobacterota_Campylobacteria_Campylobacterales_Arcobacteraceae_Arcobacter_A_Arcobacter_A-sp001655195
RS_GCF_000092245_Bacteria	Campylobacterota_Campylobacteria_Campylobacterales_Arcobacteraceae_Arcobacter_Arcobacter-nitrofigilis
GB_GCA_002869535_Bacteria	Campylobacterota_Campylobacteria_Campylobacterales_Arcobacteraceae_Arcobacter_Arcobacter-sp002869535
GB_GCA_004116465_Bacteria	Campylobacterota_Campylobacteria_Campylobacterales_Arcobacteraceae_Arcobacter_Arcobacter-sp004116465
GB_GCA_003643835_Bacteria	Campylobacterota_Campylobacteria_Campylobacterales_Arcobacteraceae_B24-G6_B24-G6-sp003643835
GB_GCA_016744485_Bacteria	Campylobacterota_Campylobacteria_Campylobacterales_Arcobacteraceae_BB30_BB30-sp016744485
GB_GCA_015663165_Bacteria	Campylobacterota_Campylobacteria_Campylobacterales_Arcobacteraceae_CAIJNA01_CAIJNA01-sp015663165
RS_GCF_006459125_Bacteria	Campylobacterota_Campylobacteria_Campylobacterales_Arcobacteraceae_Halarcobacter_Halarcobacter-anaerophilus
RS_GCF_005771535_Bacteria	Campylobacterota_Campylobacteria_Campylobacterales_Arcobacteraceae_Halarcobacter_Halarcobacter-arenosus
RS_GCF_003346815_Bacteria	Campylobacterota_Campylobacteria_Campylobacterales_Arcobacteraceae_Halarcobacter_Halarcobacter-bivalviorum
RS_GCF_013201825_Bacteria	Campylobacterota_Campylobacteria_Campylobacterales_Arcobacteraceae_Halarcobacter_Halarcobacter-ebronensis
RS_GCF_004116625_Bacteria	Campylobacterota_Campylobacteria_Campylobacterales_Arcobacteraceae_Halarcobacter_Halarcobacter-mediterraneus
GB_GCA_001895145_Bacteria	Campylobacterota_Campylobacteria_Campylobacterales_Arcobacteraceae_Halarcobacter_Halarcobacter-sp001895145
GB_GCA_002869565_Bacteria	Campylobacterota_Campylobacteria_Campylobacterales_Arcobacteraceae_Halarcobacter_Halarcobacter-sp002869565
GB_GCA_003252105_Bacteria	Campylobacterota_Campylobacteria_Campylobacterales_Arcobacteraceae_Halarcobacter_Halarcobacter-sp003252105
GB_GCA_004116455_Bacteria	Campylobacterota_Campylobacteria_Campylobacterales_Arcobacteraceae_Halarcobacter_Halarcobacter-sp004116455
GB_GCA_004118855_Bacteria	Campylobacterota_Campylobacteria_Campylobacterales_Arcobacteraceae_Halarcobacter_Halarcobacter-sp004118855
GB_GCA_013373175_Bacteria	Campylobacterota_Campylobacteria_Campylobacterales_Arcobacteraceae_Halarcobacter_Halarcobacter-sp013373175
GB_GCA_016784825_Bacteria	Campylobacterota_Campylobacteria_Campylobacterales_Arcobacteraceae_JADHTT01_JADHTT01-sp016784825
GB_GCA_018662405_Bacteria	Campylobacterota_Campylobacteria_Campylobacterales_Arcobacteraceae_JADHTT01_JADHTT01-sp018662405
RS_GCF_002837275_Bacteria	Campylobacterota_Campylobacteria_Campylobacterales_Arcobacteraceae_Malaciobacter_Malaciobacter-halophilus
RS_GCF_003544855_Bacteria	Campylobacterota_Campylobacteria_Campylobacterales_Arcobacteraceae_Malaciobacter_Malaciobacter-marinus
RS_GCF_003544935_Bacteria	Campylobacterota_Campylobacteria_Campylobacterales_Arcobacteraceae_Malaciobacter_Malaciobacter-molluscorum
GB_GCA_004116495_Bacteria	Campylobacterota_Campylobacteria_Campylobacterales_Arcobacteraceae_Malaciobacter_Malaciobacter-sp004116495
GB_GCA_004116725_Bacteria	Campylobacterota_Campylobacteria_Campylobacterales_Arcobacteraceae_Malaciobacter_Malaciobacter-sp004116725
GB_GCA_002733685_Bacteria	Campylobacterota_Campylobacteria_Campylobacterales_Arcobacteraceae_NORP36_NORP36-sp002733685
GB_GCA_013215945_Bacteria	Campylobacterota_Campylobacteria_Campylobacterales_Arcobacteraceae_NORP36_NORP36-sp004566295
RS_GCF_003667345_Bacteria	Campylobacterota_Campylobacteria_Campylobacterales_Arcobacteraceae_Poseidonibacter_Poseidonibacter-antarcticus
RS_GCF_013283835_Bacteria	Campylobacterota_Campylobacteria_Campylobacterales_Arcobacteraceae_Poseidonibacter_Poseidonibacter-lekithochrous
RS_GCF_018861145_Bacteria	Campylobacterota_Campylobacteria_Campylobacterales_Arcobacteraceae_Poseidonibacter_Poseidonibacter-lekithochrous_A
RS_GCF_001956695_Bacteria	Campylobacterota_Campylobacteria_Campylobacterales_Arcobacteraceae_Poseidonibacter_Poseidonibacter-parvus
RS_GCF_009208075_Bacteria	Campylobacterota_Campylobacteria_Campylobacterales_Arcobacteraceae_Poseidonibacter_Poseidonibacter-sp009208075
GB_GCA_905479135_Bacteria	Campylobacterota_Campylobacteria_Campylobacterales_Arcobacteraceae_Poseidonibacter_Poseidonibacter-sp905479135
GB_GCA_015488975_Bacteria	Campylobacterota_Campylobacteria_Campylobacterales_JAADDL01_JAADDL01_JAADDL01-sp015488975
GB_GCA_003978455_Bacteria	Campylobacterota_Campylobacteria_Campylobacterales_QNZT01_QNZT01_QNZT01-sp003978455
GB_GCA_015489185_Bacteria	Campylobacterota_Campylobacteria_Campylobacterales_QNZT01_QNZT01_QNZT01-sp015489185
GB_GCA_015662615_Bacteria	Campylobacterota_Campylobacteria_Campylobacterales_QNZT01_SZUA-1433_SZUA-1433-sp015662615
GB_GCA_002085085_Bacteria	Campylobacterota_Campylobacteria_Campylobacterales_Sulfurimonadaceae_4484-230_4484-230-sp002085085
GB_GCA_016744905_Bacteria	Campylobacterota_Campylobacteria_Campylobacterales_Sulfurimonadaceae_BB10_BB10-sp016744905
GB_GCA_018824305_Bacteria	Campylobacterota_Campylobacteria_Campylobacterales_Sulfurimonadaceae_CAITKP01_CAITKP01-sp018824305
GB_GCA_903885085_Bacteria	Campylobacterota_Campylobacteria_Campylobacterales_Sulfurimonadaceae_CAITKP01_CAITKP01-sp903885085
GB_GCA_903892995_Bacteria	Campylobacterota_Campylobacteria_Campylobacterales_Sulfurimonadaceae_CAITKP01_CAITKP01-sp903892995
GB_GCA_002733885_Bacteria	Campylobacterota_Campylobacteria_Campylobacterales_Sulfurimonadaceae_GCA-2733885_GCA-2733885-sp002733885
GB_GCA_012963655_Bacteria	Campylobacterota_Campylobacteria_Campylobacterales_Sulfurimonadaceae_GCA-2733885_GCA-2733885-sp012963655
GB_GCA_014859655_Bacteria	Campylobacterota_Campylobacteria_Campylobacterales_Sulfurimonadaceae_GCA-2733885_GCA-2733885-sp014859655
GB_GCA_015484575_Bacteria	Campylobacterota_Campylobacteria_Campylobacterales_Sulfurimonadaceae_S010-53_S010-53-sp015484575
GB_GCA_015488075_Bacteria	Campylobacterota_Campylobacteria_Campylobacterales_Sulfurimonadaceae_S012-15_S012-15-sp015488075
GB_GCA_015493495_Bacteria	Campylobacterota_Campylobacteria_Campylobacterales_Sulfurimonadaceae_S145-25_S145-25-sp015493495
GB_GCA_002282015_Bacteria	Campylobacterota_Campylobacteria_Campylobacterales_Sulfurimonadaceae_Sulfuricurvum_Sulfuricurvum-sp002282015
GB_GCA_011391735_Bacteria	Campylobacterota_Campylobacteria_Campylobacterales_Sulfurimonadaceae_Sulfuricurvum_Sulfuricurvum-sp011391735
RS_GCF_000147355_Bacteria	Campylobacterota_Campylobacteria_Campylobacterales_Sulfurimonadaceae_Sulfurimonas_Sulfurimonas-autotrophica
GB_GCA_015662405_Bacteria	Campylobacterota_Campylobacteria_Campylobacterales_Sulfurimonadaceae_Sulfurimonas_Sulfurimonas-autotrophica_A
RS_GCF_015265455_Bacteria	Campylobacterota_Campylobacteria_Campylobacterales_Sulfurimonadaceae_Sulfurimonas_Sulfurimonas-baltica
RS_GCF_005217605_Bacteria	Campylobacterota_Campylobacteria_Campylobacterales_Sulfurimonadaceae_Sulfurimonas_Sulfurimonas-crateris
RS_GCF_000012965_Bacteria	Campylobacterota_Campylobacteria_Campylobacterales_Sulfurimonadaceae_Sulfurimonas_Sulfurimonas-denitrificans
RS_GCF_009192995_Bacteria	Campylobacterota_Campylobacteria_Campylobacterales_Sulfurimonadaceae_Sulfurimonas_Sulfurimonas-indica
RS_GCF_015265475_Bacteria	Campylobacterota_Campylobacteria_Campylobacterales_Sulfurimonadaceae_Sulfurimonas_Sulfurimonas-marisnigri
RS_GCF_014905135_Bacteria	Campylobacterota_Campylobacteria_Campylobacterales_Sulfurimonadaceae_Sulfurimonas_Sulfurimonas-paralvinellae
RS_GCF_014905115_Bacteria	Campylobacterota_Campylobacteria_Campylobacterales_Sulfurimonadaceae_Sulfurimonas_Sulfurimonas-sediminis
GB_GCA_001829675_Bacteria	Campylobacterota_Campylobacteria_Campylobacterales_Sulfurimonadaceae_Sulfurimonas_Sulfurimonas-sp001829675
GB_GCA_001829715_Bacteria	Campylobacterota_Campylobacteria_Campylobacterales_Sulfurimonadaceae_Sulfurimonas_Sulfurimonas-sp001829715
GB_GCA_001829785_Bacteria	Campylobacterota_Campylobacteria_Campylobacterales_Sulfurimonadaceae_Sulfurimonas_Sulfurimonas-sp001829785
GB_GCA_001873135_Bacteria	Campylobacterota_Campylobacteria_Campylobacterales_Sulfurimonadaceae_Sulfurimonas_Sulfurimonas-sp001873135
GB_GCA_002335055_Bacteria	Campylobacterota_Campylobacteria_Campylobacterales_Sulfurimonadaceae_Sulfurimonas_Sulfurimonas-sp002335055
GB_GCA_002428085_Bacteria	Campylobacterota_Campylobacteria_Campylobacterales_Sulfurimonadaceae_Sulfurimonas_Sulfurimonas-sp002428085
GB_GCA_002899765_Bacteria	Campylobacterota_Campylobacteria_Campylobacterales_Sulfurimonadaceae_Sulfurimonas_Sulfurimonas-sp002899765
GB_GCA_003978465_Bacteria	Campylobacterota_Campylobacteria_Campylobacterales_Sulfurimonadaceae_Sulfurimonas_Sulfurimonas-sp003978465
RS_GCF_009068765_Bacteria	Campylobacterota_Campylobacteria_Campylobacterales_Sulfurimonadaceae_Sulfurimonas_Sulfurimonas-sp009068765
RS_GCF_009258225_Bacteria	Campylobacterota_Campylobacteria_Campylobacterales_Sulfurimonadaceae_Sulfurimonas_Sulfurimonas-sp009258225
GB_GCA_013153755_Bacteria	Campylobacterota_Campylobacteria_Campylobacterales_Sulfurimonadaceae_Sulfurimonas_Sulfurimonas-sp013153755
GB_GCA_013607665_Bacteria	Campylobacterota_Campylobacteria_Campylobacterales_Sulfurimonadaceae_Sulfurimonas_Sulfurimonas-sp013607665
GB_GCA_015487265_Bacteria	Campylobacterota_Campylobacteria_Campylobacterales_Sulfurimonadaceae_Sulfurimonas_Sulfurimonas-sp015487265
GB_GCA_015487435_Bacteria	Campylobacterota_Campylobacteria_Campylobacterales_Sulfurimonadaceae_Sulfurimonas_Sulfurimonas-sp015487435
GB_GCA_015488615_Bacteria	Campylobacterota_Campylobacteria_Campylobacterales_Sulfurimonadaceae_Sulfurimonas_Sulfurimonas-sp015488615
RS_GCF_017357825_Bacteria	Campylobacterota_Campylobacteria_Campylobacterales_Sulfurimonadaceae_Sulfurimonas_Sulfurimonas-sp017357825
GB_GCA_903903705_Bacteria	Campylobacterota_Campylobacteria_Campylobacterales_Sulfurimonadaceae_Sulfurimonas_Sulfurimonas-sp903903705
GB_GCA_015488775_Bacteria	Campylobacterota_Campylobacteria_Campylobacterales_Sulfurimonadaceae_WFNF01_WFNF01-sp015488775
GB_GCA_013151055_Bacteria	Campylobacterota_Campylobacteria_Campylobacterales_Sulfurospirillaceae_JAADIZ01_JAADIZ01-sp013151055
GB_GCA_016744795_Bacteria	Campylobacterota_Campylobacteria_Campylobacterales_Sulfurospirillaceae_Sulfurospirillum_A_Sulfurospirillum_A-sp016744795
RS_GCF_001723605_Bacteria	Campylobacterota_Campylobacteria_Campylobacterales_Sulfurospirillaceae_Sulfurospirillum_Sulfurospirillum-halorespirans
GB_GCA_002307095_Bacteria	Campylobacterota_Campylobacteria_Campylobacterales_Sulfurospirillaceae_Sulfurospirillum_Sulfurospirillum-sp002307095
GB_GCA_013153345_Bacteria	Campylobacterota_Campylobacteria_Campylobacterales_Sulfurovaceae_JAADEQ01_JAADEQ01-sp013153345
RS_GCF_000186245_Bacteria	Campylobacterota_Campylobacteria_Campylobacterales_Sulfurovaceae_Nitratifractor_Nitratifractor-salsuginis
GB_GCA_015486995_Bacteria	Campylobacterota_Campylobacteria_Campylobacterales_Sulfurovaceae_Nitratifractor_Nitratifractor-sp015486995
GB_GCA_015487065_Bacteria	Campylobacterota_Campylobacteria_Campylobacterales_Sulfurovaceae_Nitratifractor_Nitratifractor-sp015487065
GB_GCA_015488535_Bacteria	Campylobacterota_Campylobacteria_Campylobacterales_Sulfurovaceae_Nitratifractor_Nitratifractor-sp015488535
GB_GCA_015491955_Bacteria	Campylobacterota_Campylobacteria_Campylobacterales_Sulfurovaceae_Nitratifractor_Nitratifractor-sp015491955
GB_GCA_015488995_Bacteria	Campylobacterota_Campylobacteria_Campylobacterales_Sulfurovaceae_S017-3_S017-3-sp015488995
RS_GCF_000987835_Bacteria	Campylobacterota_Campylobacteria_Campylobacterales_Sulfurovaceae_Sulfurovum_Sulfurovum-lithotrophicum
RS_GCF_001595645_Bacteria	Campylobacterota_Campylobacteria_Campylobacterales_Sulfurovaceae_Sulfurovum_Sulfurovum-riftiae
RS_GCF_000010345_Bacteria	Campylobacterota_Campylobacteria_Campylobacterales_Sulfurovaceae_Sulfurovum_Sulfurovum-sp000010345
GB_GCA_002085305_Bacteria	Campylobacterota_Campylobacteria_Campylobacterales_Sulfurovaceae_Sulfurovum_Sulfurovum-sp002085305
GB_GCA_002281755_Bacteria	Campylobacterota_Campylobacteria_Campylobacterales_Sulfurovaceae_Sulfurovum_Sulfurovum-sp002281755
GB_GCA_002403155_Bacteria	Campylobacterota_Campylobacteria_Campylobacterales_Sulfurovaceae_Sulfurovum_Sulfurovum-sp002403155
GB_GCA_002733355_Bacteria	Campylobacterota_Campylobacteria_Campylobacterales_Sulfurovaceae_Sulfurovum_Sulfurovum-sp002733355
GB_GCA_002742845_Bacteria	Campylobacterota_Campylobacteria_Campylobacterales_Sulfurovaceae_Sulfurovum_Sulfurovum-sp002742845
GB_GCA_011048515_Bacteria	Campylobacterota_Campylobacteria_Campylobacterales_Sulfurovaceae_Sulfurovum_Sulfurovum-sp011048515
GB_GCA_014763885_Bacteria	Campylobacterota_Campylobacteria_Campylobacterales_Sulfurovaceae_Sulfurovum_Sulfurovum-sp014763885
GB_GCA_014763895_Bacteria	Campylobacterota_Campylobacteria_Campylobacterales_Sulfurovaceae_Sulfurovum_Sulfurovum-sp014763895
GB_GCA_015661535_Bacteria	Campylobacterota_Campylobacteria_Campylobacterales_Sulfurovaceae_Sulfurovum_Sulfurovum-sp015661535
GB_GCA_902727855_Bacteria	Campylobacterota_Campylobacteria_Campylobacterales_Sulfurovaceae_Sulfurovum_Sulfurovum-sp902727855
GB_GCA_002049495_Bacteria	Campylobacterota_Campylobacteria_Campylobacterales_Sulfurovaceae_TCS-49_TCS-49-sp002049495
GB_GCA_002311915_Bacteria	Campylobacterota_Campylobacteria_Campylobacterales_Sulfurovaceae_UBA1140_UBA1140-sp002311915
GB_GCA_013153055_Bacteria	Campylobacterota_Campylobacteria_Campylobacterales_Sulfurovaceae_UBA1140_UBA1140-sp013153055
GB_GCA_015494795_Bacteria	Campylobacterota_Campylobacteria_Campylobacterales_Sulfurovaceae_UBA1140_UBA1140-sp015494795
GB_GCA_902727995_Bacteria	Campylobacterota_Campylobacteria_Campylobacterales_Sulfurovaceae_UBA1140_UBA1140-sp902727995
GB_GCA_011330655_Bacteria	Deinococcota_Deinococci_Deinococcales_Marinithermaceae_Oceanithermus_Oceanithermus-profundus_A
GB_GCA_015490435_Bacteria	Deinococcota_Deinococci_Deinococcales_Marinithermaceae_WFXV01_WFXV01-sp015490435
RS_GCF_003574095_Bacteria	Deinococcota_Deinococci_Deinococcales_Thermaceae_Calidithermus_Calidithermus-roseus
RS_GCF_000373205_Bacteria	Deinococcota_Deinococci_Deinococcales_Thermaceae_Calidithermus_Calidithermus-timidus
RS_GCF_003226535_Bacteria	Deinococcota_Deinococci_Deinococcales_Thermaceae_Meiothermus_B_Meiothermus_B-sp003226535
RS_GCF_000620065_Bacteria	Deinococcota_Deinococci_Deinococcales_Thermaceae_Meiothermus_Meiothermus-cerbereus
RS_GCF_003574035_Bacteria	Deinococcota_Deinococci_Deinococcales_Thermaceae_Meiothermus_Meiothermus-hypogaeus
RS_GCF_003574085_Bacteria	Deinococcota_Deinococci_Deinococcales_Thermaceae_Meiothermus_Meiothermus-luteus
RS_GCF_000024425_Bacteria	Deinococcota_Deinococci_Deinococcales_Thermaceae_Meiothermus_Meiothermus-ruber
GB_GCA_011327565_Bacteria	Deinococcota_Deinococci_Deinococcales_Thermaceae_Meiothermus_Meiothermus-ruber_A
RS_GCF_000423425_Bacteria	Deinococcota_Deinococci_Deinococcales_Thermaceae_Meiothermus_Meiothermus-rufus
RS_GCF_003351145_Bacteria	Deinococcota_Deinococci_Deinococcales_Thermaceae_Meiothermus_Meiothermus-sp003351145
RS_GCF_017497985_Bacteria	Deinococcota_Deinococci_Deinococcales_Thermaceae_Meiothermus_Meiothermus-sp017497985
GB_GCA_000482765_Bacteria	Deinococcota_Deinococci_Deinococcales_Thermaceae_Meiothermus_Meiothermus-taiwanensis
RS_GCF_000771745_Bacteria	Deinococcota_Deinococci_Deinococcales_Thermaceae_Thermus_A_Thermus_A-filiformis
RS_GCF_000744885_Bacteria	Deinococcota_Deinococci_Deinococcales_Thermaceae_Thermus_Thermus-amyloliquefaciens
RS_GCF_000423905_Bacteria	Deinococcota_Deinococci_Deinococcales_Thermaceae_Thermus_Thermus-antranikianii
RS_GCF_001280255_Bacteria	Deinococcota_Deinococci_Deinococcales_Thermaceae_Thermus_Thermus-aquaticus
RS_GCF_900102145_Bacteria	Deinococcota_Deinococci_Deinococcales_Thermaceae_Thermus_Thermus-arciformis
RS_GCF_001880325_Bacteria	Deinococcota_Deinococci_Deinococcales_Thermaceae_Thermus_Thermus-brockianus
RS_GCF_003336745_Bacteria	Deinococcota_Deinococci_Deinococcales_Thermaceae_Thermus_Thermus-caldifontis
RS_GCF_004684245_Bacteria	Deinococcota_Deinococci_Deinococcales_Thermaceae_Thermus_Thermus-caldilimi
RS_GCF_000745065_Bacteria	Deinococcota_Deinococci_Deinococcales_Thermaceae_Thermus_Thermus-caliditerrae
RS_GCF_000376265_Bacteria	Deinococcota_Deinococci_Deinococcales_Thermaceae_Thermus_Thermus-igniterrae
RS_GCF_000421625_Bacteria	Deinococcota_Deinococci_Deinococcales_Thermaceae_Thermus_Thermus-islandicus
RS_GCF_000373145_Bacteria	Deinococcota_Deinococci_Deinococcales_Thermaceae_Thermus_Thermus-oshimai
RS_GCF_003426945_Bacteria	Deinococcota_Deinococci_Deinococcales_Thermaceae_Thermus_Thermus-sediminis
RS_GCF_000236585_Bacteria	Deinococcota_Deinococci_Deinococcales_Thermaceae_Thermus_Thermus-sp000236585
RS_GCF_000794385_Bacteria	Deinococcota_Deinococci_Deinococcales_Thermaceae_Thermus_Thermus-sp000794385
RS_GCF_000744175_Bacteria	Deinococcota_Deinococci_Deinococcales_Thermaceae_Thermus_Thermus-tengchongensis
RS_GCF_002964845_Bacteria	Deinococcota_Deinococci_Deinococcales_Thermaceae_Thermus_Thermus-tenuipuniceus
RS_GCF_000091545_Bacteria	Deinococcota_Deinococci_Deinococcales_Thermaceae_Thermus_Thermus-thermophilus
GB_GCA_002355995_Bacteria	Deinococcota_Deinococci_Deinococcales_Thermaceae_Thermus_Thermus-thermophilus_C
GB_GCA_014304965_Bacteria	Eremiobacterota_Eremiobacteria_Baltobacterales_Baltobacteraceae_Cryoxeromicrobium_Cryoxeromicrobium-davisii
GB_GCA_004298665_Bacteria	Eremiobacterota_Eremiobacteria_Baltobacterales_SCRA01_SCRA01_SCRA01-sp004298665
GB_GCA_004298675_Bacteria	Eremiobacterota_Eremiobacteria_Baltobacterales_SCRA01_SCRA01_SCRA01-sp004298675
RS_GCF_000022145_Bacteria	Myxococcota_Myxococcia_Myxococcales_Anaeromyxobacteraceae_Anaeromyxobacter_Anaeromyxobacter-dehalogenans
RS_GCF_000013385_Bacteria	Myxococcota_Myxococcia_Myxococcales_Anaeromyxobacteraceae_Anaeromyxobacter_Anaeromyxobacter-dehalogenans_B
RS_GCF_000964525_Bacteria	Myxococcota_Myxococcia_Myxococcales_Anaeromyxobacteraceae_Anaeromyxobacter_Anaeromyxobacter-sp000964525
GB_GCA_016926755_Bacteria	Myxococcota_Myxococcia_Myxococcales_Myxococcaceae_Hyalangium_Hyalangium-sp016926755
GB_GCA_001899585_Bacteria	Proteobacteria_Alphaproteobacteria_Acetobacterales_Acetobacteraceae_70-18_70-18-sp001899585
RS_GCF_900156265_Bacteria	Proteobacteria_Alphaproteobacteria_Acetobacterales_Acetobacteraceae_Acidiphilium_Acidiphilium-rubrum
RS_GCF_902712915_Bacteria	Proteobacteria_Alphaproteobacteria_Acetobacterales_Acetobacteraceae_Acidiphilium_Acidiphilium-sp002255515
GB_GCA_002279355_Bacteria	Proteobacteria_Alphaproteobacteria_Acetobacterales_Acetobacteraceae_Acidiphilium_Acidiphilium-sp002279355
RS_GCF_000964365_Bacteria	Proteobacteria_Alphaproteobacteria_Acetobacterales_Acetobacteraceae_Acidisphaera_Acidisphaera-rubrifaciens
GB_GCA_002281005_Bacteria	Proteobacteria_Alphaproteobacteria_Acetobacterales_Acetobacteraceae_Acidocella_Acidocella-sp002281005
GB_GCA_014377905_Bacteria	Proteobacteria_Alphaproteobacteria_Acetobacterales_Acetobacteraceae_CAITOL01_CAITOL01-sp014377905
RS_GCF_019203965_Bacteria	Proteobacteria_Alphaproteobacteria_Acetobacterales_Acetobacteraceae_Elioraea_A_Elioraea_A-sp019203965
RS_GCF_006704265_Bacteria	Proteobacteria_Alphaproteobacteria_Acetobacterales_Acetobacteraceae_Elioraea_Elioraea-sp006704265
RS_GCF_000378465_Bacteria	Proteobacteria_Alphaproteobacteria_Acetobacterales_Acetobacteraceae_Elioraea_Elioraea-tepidiphila
RS_GCF_003336755_Bacteria	Proteobacteria_Alphaproteobacteria_Acetobacterales_Acetobacteraceae_Elioraea_Elioraea-thermophila
RS_GCF_004343615_Bacteria	Proteobacteria_Alphaproteobacteria_Acetobacterales_Acetobacteraceae_Paracraurococcus_Paracraurococcus-sp004343615
GB_GCA_018971455_Bacteria	Proteobacteria_Alphaproteobacteria_Acetobacterales_Acetobacteraceae_REEB85_REEB85-sp018971455
RS_GCF_000425365_Bacteria	Proteobacteria_Alphaproteobacteria_Acetobacterales_Acetobacteraceae_Roseococcus_Roseococcus-flocculans
RS_GCF_003173615_Bacteria	Proteobacteria_Alphaproteobacteria_Acetobacterales_Acetobacteraceae_Roseomonas_A_Roseomonas_A-sp003173615
RS_GCF_014644535_Bacteria	Proteobacteria_Alphaproteobacteria_Acetobacterales_Acetobacteraceae_Roseomonas_B_Roseomonas_B-lacus
RS_GCF_005222755_Bacteria	Proteobacteria_Alphaproteobacteria_Acetobacterales_Acetobacteraceae_Roseomonas_B_Roseomonas_B-sp005222755
GB_GCA_016869715_Bacteria	Proteobacteria_Alphaproteobacteria_Acetobacterales_Acetobacteraceae_Roseomonas_B_Roseomonas_B-sp016869715
GB_GCA_016869735_Bacteria	Proteobacteria_Alphaproteobacteria_Acetobacterales_Acetobacteraceae_Roseomonas_B_Roseomonas_B-sp016869735
RS_GCF_000429625_Bacteria	Proteobacteria_Alphaproteobacteria_Azospirillales_Azospirillaceae_Azospirillum_Azospirillum-halopraeferens
RS_GCF_013423485_Bacteria	Proteobacteria_Alphaproteobacteria_Azospirillales_Azospirillaceae_Azospirillum_Azospirillum-oleiclasticum
RS_GCF_900177515_Bacteria	Proteobacteria_Alphaproteobacteria_Azospirillales_Azospirillaceae_Azospirillum_Azospirillum-oryzae_A
RS_GCF_004923315_Bacteria	Proteobacteria_Alphaproteobacteria_Azospirillales_Azospirillaceae_Azospirillum_Azospirillum-sp003116065
RS_GCF_003116095_Bacteria	Proteobacteria_Alphaproteobacteria_Azospirillales_Azospirillaceae_Azospirillum_Azospirillum-sp003116095
RS_GCF_003590795_Bacteria	Proteobacteria_Alphaproteobacteria_Azospirillales_Azospirillaceae_Azospirillum_Azospirillum-sp003590795
RS_GCF_016595245_Bacteria	Proteobacteria_Alphaproteobacteria_Azospirillales_Azospirillaceae_Azospirillum_Azospirillum-sp016595245
RS_GCF_001305595_Bacteria	Proteobacteria_Alphaproteobacteria_Azospirillales_Azospirillaceae_Azospirillum_Azospirillum-thiophilum
RS_GCF_016653635_Bacteria	Proteobacteria_Alphaproteobacteria_Azospirillales_Azospirillaceae_Skermanella_Skermanella-sp016653635
GB_GCA_016869915_Bacteria	Proteobacteria_Alphaproteobacteria_CACIAM-22H2_CACIAM-22H2_CAIOSQ01_CAIOSQ01-sp016869915
GB_GCA_016794025_Bacteria	Proteobacteria_Alphaproteobacteria_CACIAM-22H2_CACIAM-22H2_Tagaea_Tagaea-sp016794025
GB_GCA_016869175_Bacteria	Proteobacteria_Alphaproteobacteria_GCA-2731375_GCA-2731375_VGEV01_VGEV01-sp016869175
GB_GCA_902553945_Bacteria	Proteobacteria_Alphaproteobacteria_HIMB59_GCA-002718135_AG-337-I02_AG-337-I02-sp902553945
GB_GCA_902560725_Bacteria	Proteobacteria_Alphaproteobacteria_HIMB59_GCA-002718135_AG-337-I02_AG-337-I02-sp902560725
GB_GCA_902561355_Bacteria	Proteobacteria_Alphaproteobacteria_HIMB59_GCA-002718135_AG-337-I02_AG-337-I02-sp902561355
GB_GCA_902569865_Bacteria	Proteobacteria_Alphaproteobacteria_HIMB59_GCA-002718135_AG-337-I02_AG-337-I02-sp902569865
GB_GCA_902576125_Bacteria	Proteobacteria_Alphaproteobacteria_HIMB59_GCA-002718135_AG-337-I02_AG-337-I02-sp902576125
GB_GCA_902591485_Bacteria	Proteobacteria_Alphaproteobacteria_HIMB59_GCA-002718135_AG-337-I02_AG-337-I02-sp902591485
GB_GCA_902594815_Bacteria	Proteobacteria_Alphaproteobacteria_HIMB59_GCA-002718135_AG-337-I02_AG-337-I02-sp902594815
GB_GCA_902595425_Bacteria	Proteobacteria_Alphaproteobacteria_HIMB59_GCA-002718135_AG-337-I02_AG-337-I02-sp902595425
GB_GCA_902595855_Bacteria	Proteobacteria_Alphaproteobacteria_HIMB59_GCA-002718135_AG-337-I02_AG-337-I02-sp902595855
GB_GCA_902596365_Bacteria	Proteobacteria_Alphaproteobacteria_HIMB59_GCA-002718135_AG-337-I02_AG-337-I02-sp902596365
GB_GCA_902603095_Bacteria	Proteobacteria_Alphaproteobacteria_HIMB59_GCA-002718135_AG-337-I02_AG-337-I02-sp902603095
GB_GCA_902635455_Bacteria	Proteobacteria_Alphaproteobacteria_HIMB59_GCA-002718135_CACPNW01_CACPNW01-sp902635455
GB_GCA_902567855_Bacteria	Proteobacteria_Alphaproteobacteria_HIMB59_GCA-002718135_MarineAlpha5-Bin3_MarineAlpha5-Bin3-sp902567855
GB_GCA_902577425_Bacteria	Proteobacteria_Alphaproteobacteria_HIMB59_GCA-002718135_MarineAlpha5-Bin3_MarineAlpha5-Bin3-sp902577425
GB_GCA_016793965_Bacteria	Proteobacteria_Alphaproteobacteria_JAEULF01_JAEULF01_JAEULF01_JAEULF01-sp016793965
GB_GCA_000383115_Bacteria	Proteobacteria_Alphaproteobacteria_Puniceispirillales_AAA536-G10_AAA536-G10_AAA536-G10-sp000383115
GB_GCA_000421325_Bacteria	Proteobacteria_Alphaproteobacteria_Puniceispirillales_AAA536-G10_AAA536-G10_AAA536-G10-sp000421325
GB_GCA_003278095_Bacteria	Proteobacteria_Alphaproteobacteria_Puniceispirillales_AAA536-G10_AAA536-G10_AAA536-G10-sp003278095
GB_GCA_003282145_Bacteria	Proteobacteria_Alphaproteobacteria_Puniceispirillales_AAA536-G10_AAA536-G10_AAA536-G10-sp003282145
GB_GCA_003282885_Bacteria	Proteobacteria_Alphaproteobacteria_Puniceispirillales_AAA536-G10_AAA536-G10_AAA536-G10-sp003282885
GB_GCA_003283875_Bacteria	Proteobacteria_Alphaproteobacteria_Puniceispirillales_AAA536-G10_AAA536-G10_AAA536-G10-sp003283875
GB_GCA_003284565_Bacteria	Proteobacteria_Alphaproteobacteria_Puniceispirillales_AAA536-G10_AAA536-G10_AAA536-G10-sp003284565
GB_GCA_902517275_Bacteria	Proteobacteria_Alphaproteobacteria_Puniceispirillales_AAA536-G10_AAA536-G10_AAA536-G10-sp902517275
GB_GCA_902517815_Bacteria	Proteobacteria_Alphaproteobacteria_Puniceispirillales_AAA536-G10_AAA536-G10_AAA536-G10-sp902517815
GB_GCA_902530325_Bacteria	Proteobacteria_Alphaproteobacteria_Puniceispirillales_AAA536-G10_AAA536-G10_AAA536-G10-sp902530325
GB_GCA_902537945_Bacteria	Proteobacteria_Alphaproteobacteria_Puniceispirillales_AAA536-G10_AAA536-G10_AAA536-G10-sp902537945
GB_GCA_902558885_Bacteria	Proteobacteria_Alphaproteobacteria_Puniceispirillales_AAA536-G10_AAA536-G10_AAA536-G10-sp902558885
GB_GCA_902578805_Bacteria	Proteobacteria_Alphaproteobacteria_Puniceispirillales_AAA536-G10_AAA536-G10_AAA536-G10-sp902578805
GB_GCA_902592615_Bacteria	Proteobacteria_Alphaproteobacteria_Puniceispirillales_AAA536-G10_AAA536-G10_AAA536-G10-sp902592615
GB_GCA_902593735_Bacteria	Proteobacteria_Alphaproteobacteria_Puniceispirillales_AAA536-G10_AAA536-G10_AAA536-G10-sp902593735
GB_GCA_902595515_Bacteria	Proteobacteria_Alphaproteobacteria_Puniceispirillales_AAA536-G10_AAA536-G10_AAA536-G10-sp902595515
GB_GCA_902619615_Bacteria	Proteobacteria_Alphaproteobacteria_Puniceispirillales_AAA536-G10_AAA536-G10_AAA536-G10-sp902619615
GB_GCA_902622875_Bacteria	Proteobacteria_Alphaproteobacteria_Puniceispirillales_AAA536-G10_AAA536-G10_AAA536-G10-sp902622875
GB_GCA_902623995_Bacteria	Proteobacteria_Alphaproteobacteria_Puniceispirillales_AAA536-G10_AAA536-G10_AAA536-G10-sp902623995
GB_GCA_902625215_Bacteria	Proteobacteria_Alphaproteobacteria_Puniceispirillales_AAA536-G10_AAA536-G10_AAA536-G10-sp902625215
GB_GCA_003210055_Bacteria	Proteobacteria_Alphaproteobacteria_Puniceispirillales_AAA536-G10_AG-426-I14_AG-426-I14-sp003210055
GB_GCA_003210115_Bacteria	Proteobacteria_Alphaproteobacteria_Puniceispirillales_AAA536-G10_TMED54_TMED54-sp003210115
GB_GCA_902524215_Bacteria	Proteobacteria_Alphaproteobacteria_Puniceispirillales_AAA536-G10_TMED54_TMED54-sp902524215
GB_GCA_902615025_Bacteria	Proteobacteria_Alphaproteobacteria_Puniceispirillales_AAA536-G10_TMED54_TMED54-sp902615025
GB_GCA_902615325_Bacteria	Proteobacteria_Alphaproteobacteria_Puniceispirillales_AAA536-G10_TMED54_TMED54-sp902615325
GB_GCA_902616005_Bacteria	Proteobacteria_Alphaproteobacteria_Puniceispirillales_AAA536-G10_TMED54_TMED54-sp902616005
GB_GCA_902618195_Bacteria	Proteobacteria_Alphaproteobacteria_Puniceispirillales_AAA536-G10_TMED54_TMED54-sp902618195
GB_GCA_902539295_Bacteria	Proteobacteria_Alphaproteobacteria_Puniceispirillales_GCA-002684695_GCA-002684695_GCA-002684695-sp902539295
GB_GCA_016778895_Bacteria	Proteobacteria_Alphaproteobacteria_Puniceispirillales_Puniceispirillaceae_UBA3439_UBA3439-sp016778895
GB_GCA_012269555_Bacteria	Proteobacteria_Alphaproteobacteria_Puniceispirillales_Puniceispirillaceae_UBA5951_UBA5951-sp012269555
GB_GCA_902573725_Bacteria	Proteobacteria_Alphaproteobacteria_Puniceispirillales_Puniceispirillaceae_UBA5951_UBA5951-sp902573725
GB_GCA_009772935_Bacteria	Proteobacteria_Alphaproteobacteria_Reyranellales_Reyranellaceae_Reyranella_Reyranella-sp009772935
GB_GCA_016870055_Bacteria	Proteobacteria_Alphaproteobacteria_Reyranellales_Reyranellaceae_Reyranella_Reyranella-sp016870055
RS_GCF_019160155_Bacteria	Proteobacteria_Alphaproteobacteria_Rhizobiales_Ancalomicrobiaceae_Pinisolibacter_Pinisolibacter-aquiterrae
GB_GCA_002298965_Bacteria	Proteobacteria_Alphaproteobacteria_Rhizobiales_Ancalomicrobiaceae_Pinisolibacter_Pinisolibacter-sp002298965
GB_GCA_001898965_Bacteria	Proteobacteria_Alphaproteobacteria_Rhizobiales_Beijerinckiaceae_28-YEA-48_28-YEA-48-sp001898965
RS_GCF_900104955_Bacteria	Proteobacteria_Alphaproteobacteria_Rhizobiales_Beijerinckiaceae_28-YEA-48_28-YEA-48-sp900104955
GB_GCA_002279705_Bacteria	Proteobacteria_Alphaproteobacteria_Rhizobiales_Beijerinckiaceae_Bosea_Bosea-sp002279705
RS_GCF_014197695_Bacteria	Proteobacteria_Alphaproteobacteria_Rhizobiales_Beijerinckiaceae_Rhodoblastus_Rhodoblastus-acidophilus_B
RS_GCF_014645695_Bacteria	Proteobacteria_Alphaproteobacteria_Rhizobiales_Beijerinckiaceae_Salinarimonas_Salinarimonas-ramus
RS_GCF_000429045_Bacteria	Proteobacteria_Alphaproteobacteria_Rhizobiales_Beijerinckiaceae_Salinarimonas_Salinarimonas-rosea
GB_GCA_016764535_Bacteria	Proteobacteria_Alphaproteobacteria_Rhizobiales_Cohaesibacteraceae_Cohaesibacter_Cohaesibacter-sp016764535
GB_GCA_015487985_Bacteria	Proteobacteria_Alphaproteobacteria_Rhizobiales_Devosiaceae_DROE01_DROE01-sp015487985
GB_GCA_905480435_Bacteria	Proteobacteria_Alphaproteobacteria_Rhizobiales_Hyphomicrobiaceae_CAJQQK01_CAJQQK01-sp905480435
GB_GCA_002928395_Bacteria	Proteobacteria_Alphaproteobacteria_Rhizobiales_Hyphomicrobiaceae_Hyphomicrobium_Hyphomicrobium-sp002928395
GB_GCA_017304275_Bacteria	Proteobacteria_Alphaproteobacteria_Rhizobiales_Hyphomicrobiaceae_Hyphomicrobium_Hyphomicrobium-sp017304275
RS_GCF_000383415_Bacteria	Proteobacteria_Alphaproteobacteria_Rhizobiales_Hyphomicrobiaceae_Hyphomicrobium_Hyphomicrobium-zavarzinii
RS_GCF_014126615_Bacteria	Proteobacteria_Alphaproteobacteria_Rhizobiales_Rhizobiaceae_Allorhizobium_Allorhizobium-thiooxidans
RS_GCF_900220985_Bacteria	Proteobacteria_Alphaproteobacteria_Rhizobiales_Rhizobiaceae_Hoeflea_Hoeflea-halophila
RS_GCF_002088275_Bacteria	Proteobacteria_Alphaproteobacteria_Rhizobiales_Rhizobiaceae_Jiella_Jiella-sp002088275
RS_GCF_003934165_Bacteria	Proteobacteria_Alphaproteobacteria_Rhizobiales_Rhizobiaceae_Pseudaminobacter_Pseudaminobacter-arsenicus
GB_GCA_905480295_Bacteria	Proteobacteria_Alphaproteobacteria_Rhizobiales_Rhizobiaceae_R2A130_R2A130-sp905480295
RS_GCF_003012935_Bacteria	Proteobacteria_Alphaproteobacteria_Rhizobiales_Stappiaceae_Pannonibacter_Pannonibacter-carbonis
GB_GCA_017305595_Bacteria	Proteobacteria_Alphaproteobacteria_Rhizobiales_Xanthobacteraceae_62-47_62-47-sp017305595
RS_GCF_000308295_Bacteria	Proteobacteria_Alphaproteobacteria_Rhizobiales_Xanthobacteraceae_Afipia_Afipia-birgiae
GB_GCA_016201045_Bacteria	Proteobacteria_Alphaproteobacteria_Rhizobiales_Xanthobacteraceae_Afipia_Afipia-sp016201045
GB_GCA_017308495_Bacteria	Proteobacteria_Alphaproteobacteria_Rhizobiales_Xanthobacteraceae_Afipia_Afipia-sp017308495
GB_GCA_017308595_Bacteria	Proteobacteria_Alphaproteobacteria_Rhizobiales_Xanthobacteraceae_Afipia_Afipia-sp017308595
RS_GCF_018129385_Bacteria	Proteobacteria_Alphaproteobacteria_Rhizobiales_Xanthobacteraceae_Bradyrhizobium_Bradyrhizobium-lablabi_C
RS_GCF_002776695_Bacteria	Proteobacteria_Alphaproteobacteria_Rhizobiales_Xanthobacteraceae_Bradyrhizobium_Bradyrhizobium-nitroreducens
GB_GCA_005884855_Bacteria	Proteobacteria_Alphaproteobacteria_Rhizobiales_Xanthobacteraceae_Bradyrhizobium_Bradyrhizobium-sp005884855
GB_GCA_003140315_Bacteria	Proteobacteria_Alphaproteobacteria_Rhizobiales_Xanthobacteraceae_PALSA-894_PALSA-894-sp003140315
GB_GCA_005884685_Bacteria	Proteobacteria_Alphaproteobacteria_Rhizobiales_Xanthobacteraceae_PALSA-894_PALSA-894-sp005884685
RS_GCF_001426945_Bacteria	Proteobacteria_Alphaproteobacteria_Rhizobiales_Xanthobacteraceae_Pseudolabrys_Pseudolabrys-sp001426945
GB_GCA_001464835_Bacteria	Proteobacteria_Alphaproteobacteria_Rhizobiales_Xanthobacteraceae_Pseudolabrys_Pseudolabrys-sp001464835
GB_GCA_003152455_Bacteria	Proteobacteria_Alphaproteobacteria_Rhizobiales_Xanthobacteraceae_Pseudolabrys_Pseudolabrys-sp003152455
RS_GCF_003367195_Bacteria	Proteobacteria_Alphaproteobacteria_Rhizobiales_Xanthobacteraceae_Pseudolabrys_Pseudolabrys-sp003367195
RS_GCF_005153485_Bacteria	Proteobacteria_Alphaproteobacteria_Rhizobiales_Xanthobacteraceae_Pseudolabrys_Pseudolabrys-sp005153485
GB_GCA_016185205_Bacteria	Proteobacteria_Alphaproteobacteria_Rhizobiales_Xanthobacteraceae_Pseudolabrys_Pseudolabrys-sp016185205
GB_GCA_017849615_Bacteria	Proteobacteria_Alphaproteobacteria_Rhizobiales_Xanthobacteraceae_Pseudolabrys_Pseudolabrys-sp017849615
GB_GCA_018240595_Bacteria	Proteobacteria_Alphaproteobacteria_Rhizobiales_Xanthobacteraceae_Pseudolabrys_Pseudolabrys-sp018240595
GB_GCA_018242205_Bacteria	Proteobacteria_Alphaproteobacteria_Rhizobiales_Xanthobacteraceae_Pseudolabrys_Pseudolabrys-sp018242205
GB_GCA_903839845_Bacteria	Proteobacteria_Alphaproteobacteria_Rhizobiales_Xanthobacteraceae_Pseudolabrys_Pseudolabrys-sp903839845
GB_GCA_903878085_Bacteria	Proteobacteria_Alphaproteobacteria_Rhizobiales_Xanthobacteraceae_Pseudolabrys_Pseudolabrys-sp903878085
GB_GCA_903885555_Bacteria	Proteobacteria_Alphaproteobacteria_Rhizobiales_Xanthobacteraceae_Pseudolabrys_Pseudolabrys-sp903885555
RS_GCF_016653355_Bacteria	Proteobacteria_Alphaproteobacteria_Rhizobiales_Xanthobacteraceae_Rhodoplanes_Rhodoplanes-elegans
GB_GCA_009720755_Bacteria	Proteobacteria_Alphaproteobacteria_Rhizobiales_Xanthobacteraceae_Rhodoplanes_Rhodoplanes-serenus
RS_GCF_000293785_Bacteria	Proteobacteria_Alphaproteobacteria_Rhizobiales_Xanthobacteraceae_Rhodoplanes_Rhodoplanes-sp000293785
GB_GCA_013377085_Bacteria	Proteobacteria_Alphaproteobacteria_Rhizobiales_Xanthobacteraceae_Rhodoplanes_Rhodoplanes-sp013377085
GB_GCA_016793685_Bacteria	Proteobacteria_Alphaproteobacteria_Rhizobiales_Xanthobacteraceae_Rhodoplanes_Rhodoplanes-sp016793685
GB_GCA_004173095_Bacteria	Proteobacteria_Alphaproteobacteria_Rhizobiales_Xanthobacteraceae_Tardiphaga_Tardiphaga-sp004173095
RS_GCF_003667445_Bacteria	Proteobacteria_Alphaproteobacteria_Rhizobiales_Xanthobacteraceae_Xanthobacter_Xanthobacter-tagetidis
GB_GCA_002367285_Bacteria	Proteobacteria_Alphaproteobacteria_Rhodobacterales_Rhodobacteraceae_Aliiroseovarius_Aliiroseovarius-sp002367285
GB_GCA_014323795_Bacteria	Proteobacteria_Alphaproteobacteria_Rhodobacterales_Rhodobacteraceae_Amylibacter_Amylibacter-sp014323795
RS_GCF_005938225_Bacteria	Proteobacteria_Alphaproteobacteria_Rhodobacterales_Rhodobacteraceae_Arenibacterium_Arenibacterium-halophilum
GB_GCA_018647275_Bacteria	Proteobacteria_Alphaproteobacteria_Rhodobacterales_Rhodobacteraceae_Ascidiaceihabitans_Ascidiaceihabitans-sp018647275
GB_GCA_013042895_Bacteria	Proteobacteria_Alphaproteobacteria_Rhodobacterales_Rhodobacteraceae_Boseongicola_Boseongicola-sp013042895
GB_GCA_014239455_Bacteria	Proteobacteria_Alphaproteobacteria_Rhodobacterales_Rhodobacteraceae_CACIIZ01_CACIIZ01-sp014239455
GB_GCA_902541695_Bacteria	Proteobacteria_Alphaproteobacteria_Rhodobacterales_Rhodobacteraceae_CACIIZ01_CACIIZ01-sp902541695
GB_GCA_902570265_Bacteria	Proteobacteria_Alphaproteobacteria_Rhodobacterales_Rhodobacteraceae_CACIIZ01_CACIIZ01-sp902570265
GB_GCA_902578545_Bacteria	Proteobacteria_Alphaproteobacteria_Rhodobacterales_Rhodobacteraceae_CACIIZ01_CACIIZ01-sp902578545
GB_GCA_902611605_Bacteria	Proteobacteria_Alphaproteobacteria_Rhodobacterales_Rhodobacteraceae_CACIIZ01_CACIIZ01-sp902611605
GB_GCA_902625475_Bacteria	Proteobacteria_Alphaproteobacteria_Rhodobacterales_Rhodobacteraceae_CACIIZ01_CACIIZ01-sp902625475
GB_GCA_902524655_Bacteria	Proteobacteria_Alphaproteobacteria_Rhodobacterales_Rhodobacteraceae_CACIJG01_CACIJG01-sp902524655
GB_GCA_902524845_Bacteria	Proteobacteria_Alphaproteobacteria_Rhodobacterales_Rhodobacteraceae_CACIJG01_CACIJG01-sp902524845
GB_GCA_902537215_Bacteria	Proteobacteria_Alphaproteobacteria_Rhodobacterales_Rhodobacteraceae_CACIJG01_CACIJG01-sp902537215
GB_GCA_902537235_Bacteria	Proteobacteria_Alphaproteobacteria_Rhodobacterales_Rhodobacteraceae_CACIJG01_CACIJG01-sp902537235
GB_GCA_902574225_Bacteria	Proteobacteria_Alphaproteobacteria_Rhodobacterales_Rhodobacteraceae_CACIJG01_CACIJG01-sp902574225
GB_GCA_902576905_Bacteria	Proteobacteria_Alphaproteobacteria_Rhodobacterales_Rhodobacteraceae_CACIJG01_CACIJG01-sp902576905
GB_GCA_902580265_Bacteria	Proteobacteria_Alphaproteobacteria_Rhodobacterales_Rhodobacteraceae_CACIJG01_CACIJG01-sp902580265
GB_GCA_902584635_Bacteria	Proteobacteria_Alphaproteobacteria_Rhodobacterales_Rhodobacteraceae_CACIJG01_CACIJG01-sp902584635
GB_GCA_902586885_Bacteria	Proteobacteria_Alphaproteobacteria_Rhodobacterales_Rhodobacteraceae_CACIJG01_CACIJG01-sp902586885
GB_GCA_902596605_Bacteria	Proteobacteria_Alphaproteobacteria_Rhodobacterales_Rhodobacteraceae_CACIJG01_CACIJG01-sp902596605
GB_GCA_902619165_Bacteria	Proteobacteria_Alphaproteobacteria_Rhodobacterales_Rhodobacteraceae_CACIJG01_CACIJG01-sp902619165
GB_GCA_002684375_Bacteria	Proteobacteria_Alphaproteobacteria_Rhodobacterales_Rhodobacteraceae_CPC320_CPC320-sp002684375
RS_GCF_004358675_Bacteria	Proteobacteria_Alphaproteobacteria_Rhodobacterales_Rhodobacteraceae_Fluviibacterium_Fluviibacterium-aquatile
GB_GCA_003172915_Bacteria	Proteobacteria_Alphaproteobacteria_Rhodobacterales_Rhodobacteraceae_Fluviibacterium_Fluviibacterium-sp003172915
GB_GCA_003254465_Bacteria	Proteobacteria_Alphaproteobacteria_Rhodobacterales_Rhodobacteraceae_Fluviibacterium_Fluviibacterium-sp003254465
RS_GCF_014901205_Bacteria	Proteobacteria_Alphaproteobacteria_Rhodobacterales_Rhodobacteraceae_Fluviibacterium_Fluviibacterium-sp014901205
GB_GCA_002705045_Bacteria	Proteobacteria_Alphaproteobacteria_Rhodobacterales_Rhodobacteraceae_GCA-002705045_GCA-002705045-sp002705045
GB_GCA_009920815_Bacteria	Proteobacteria_Alphaproteobacteria_Rhodobacterales_Rhodobacteraceae_HIMB11_HIMB11-sp009920815
GB_GCA_018222665_Bacteria	Proteobacteria_Alphaproteobacteria_Rhodobacterales_Rhodobacteraceae_HIMB11_HIMB11-sp018222665
GB_GCA_000169395_Bacteria	Proteobacteria_Alphaproteobacteria_Rhodobacterales_Rhodobacteraceae_HTCC2150_HTCC2150-sp000169395
GB_GCA_017643305_Bacteria	Proteobacteria_Alphaproteobacteria_Rhodobacterales_Rhodobacteraceae_HXMU1420-2_HXMU1420-2-sp017643305
GB_GCA_013002465_Bacteria	Proteobacteria_Alphaproteobacteria_Rhodobacterales_Rhodobacteraceae_JABDJO01_JABDJO01-sp013002465
RS_GCF_000466965_Bacteria	Proteobacteria_Alphaproteobacteria_Rhodobacterales_Rhodobacteraceae_Limimaricola_Limimaricola-cinnabarinus
RS_GCF_900109145_Bacteria	Proteobacteria_Alphaproteobacteria_Rhodobacterales_Rhodobacteraceae_Marinovum_Marinovum-algicola
GB_GCA_012270125_Bacteria	Proteobacteria_Alphaproteobacteria_Rhodobacterales_Rhodobacteraceae_MED-G52_MED-G52-sp001627375
GB_GCA_001627925_Bacteria	Proteobacteria_Alphaproteobacteria_Rhodobacterales_Rhodobacteraceae_MED-G52_MED-G52-sp001627925
GB_GCA_902543185_Bacteria	Proteobacteria_Alphaproteobacteria_Rhodobacterales_Rhodobacteraceae_MED-G52_MED-G52-sp902543185
GB_GCA_902554885_Bacteria	Proteobacteria_Alphaproteobacteria_Rhodobacterales_Rhodobacteraceae_MED-G52_MED-G52-sp902554885
RS_GCF_008124525_Bacteria	Proteobacteria_Alphaproteobacteria_Rhodobacterales_Rhodobacteraceae_Oceanicella_Oceanicella-actignis
GB_GCA_018500005_Bacteria	Proteobacteria_Alphaproteobacteria_Rhodobacterales_Rhodobacteraceae_Octadecabacter_Octadecabacter-sp018500005
RS_GCF_003594815_Bacteria	Proteobacteria_Alphaproteobacteria_Rhodobacterales_Rhodobacteraceae_Paracoccus_Paracoccus-aestuarii
RS_GCF_003286075_Bacteria	Proteobacteria_Alphaproteobacteria_Rhodobacterales_Rhodobacteraceae_Paracoccus_Paracoccus-endophyticus
RS_GCF_002865605_Bacteria	Proteobacteria_Alphaproteobacteria_Rhodobacterales_Rhodobacteraceae_Paracoccus_Paracoccus-jeotgali
RS_GCF_900106665_Bacteria	Proteobacteria_Alphaproteobacteria_Rhodobacterales_Rhodobacteraceae_Paracoccus_Paracoccus-sanguinis
RS_GCF_003008555_Bacteria	Proteobacteria_Alphaproteobacteria_Rhodobacterales_Rhodobacteraceae_Pukyongiella_Pukyongiella-litopenaei
GB_GCA_007121115_Bacteria	Proteobacteria_Alphaproteobacteria_Rhodobacterales_Rhodobacteraceae_PUOA01_PUOA01-sp007121115
GB_GCA_003696705_Bacteria	Proteobacteria_Alphaproteobacteria_Rhodobacterales_Rhodobacteraceae_RFGD01_RFGD01-sp003696705
GB_GCA_007126375_Bacteria	Proteobacteria_Alphaproteobacteria_Rhodobacterales_Rhodobacteraceae_Rhodobaculum_Rhodobaculum-sp007126375
RS_GCF_009649175_Bacteria	Proteobacteria_Alphaproteobacteria_Rhodobacterales_Rhodobacteraceae_Rhodovulum_Rhodovulum-strictum
GB_GCA_003567315_Bacteria	Proteobacteria_Alphaproteobacteria_Rhodobacterales_Rhodobacteraceae_Roseinatronobacter_Roseinatronobacter-sp003567315
GB_GCA_007116575_Bacteria	Proteobacteria_Alphaproteobacteria_Rhodobacterales_Rhodobacteraceae_Roseinatronobacter_Roseinatronobacter-sp007116575
GB_GCA_007128135_Bacteria	Proteobacteria_Alphaproteobacteria_Rhodobacterales_Rhodobacteraceae_Roseinatronobacter_Roseinatronobacter-sp007128135
GB_GCA_007692585_Bacteria	Proteobacteria_Alphaproteobacteria_Rhodobacterales_Rhodobacteraceae_Roseinatronobacter_Roseinatronobacter-sp007692585
GB_GCA_007695345_Bacteria	Proteobacteria_Alphaproteobacteria_Rhodobacterales_Rhodobacteraceae_Roseinatronobacter_Roseinatronobacter-sp007695345
GB_GCA_017510335_Bacteria	Proteobacteria_Alphaproteobacteria_Rhodobacterales_Rhodobacteraceae_Roseinatronobacter_Roseinatronobacter-sp017510335
GB_GCA_002366775_Bacteria	Proteobacteria_Alphaproteobacteria_Rhodobacterales_Rhodobacteraceae_Roseovarius_Roseovarius-sp002366775
RS_GCF_001634885_Bacteria	Proteobacteria_Alphaproteobacteria_Rhodobacterales_Rhodobacteraceae_Sulfitobacter_Sulfitobacter-sp001634885
GB_GCA_014763785_Bacteria	Proteobacteria_Alphaproteobacteria_Rhodobacterales_Rhodobacteraceae_SZUA-611_SZUA-611-sp014763785
RS_GCF_900108225_Bacteria	Proteobacteria_Alphaproteobacteria_Rhodobacterales_Rhodobacteraceae_Thalassococcus_Thalassococcus-halodurans
RS_GCF_003003255_Bacteria	Proteobacteria_Alphaproteobacteria_Rhodobacterales_Rhodobacteraceae_Tropicimonas_Tropicimonas-haliotis
RS_GCF_000315795_Bacteria	Proteobacteria_Alphaproteobacteria_Rhodospirillales_Rhodospirillaceae_Caenispirillum_Caenispirillum-salinarum
RS_GCF_900093605_Bacteria	Proteobacteria_Alphaproteobacteria_Rhodospirillales_Terasakiellaceae_Terasakiella_Terasakiella-magnetica_A
RS_GCF_000688235_Bacteria	Proteobacteria_Alphaproteobacteria_Rhodospirillales_Terasakiellaceae_Terasakiella_Terasakiella-pusilla
RS_GCF_004564135_Bacteria	Proteobacteria_Alphaproteobacteria_Rhodospirillales_Terasakiellaceae_Terasakiella_Terasakiella-sp004564135
GB_GCA_013373205_Bacteria	Proteobacteria_Alphaproteobacteria_Rhodospirillales_Terasakiellaceae_Terasakiella_Terasakiella-sp013373205
GB_GCA_017854775_Bacteria	Proteobacteria_Gammaproteobacteria_Arenicellales_Arenicellaceae_Arenicella_Arenicella-sp017854775
GB_GCA_002868855_Bacteria	Proteobacteria_Gammaproteobacteria_BM003_BM003_BM003_BM003-sp002868855
RS_GCF_013116765_Bacteria	Proteobacteria_Gammaproteobacteria_Burkholderiales_Burkholderiaceae_Achromobacter_Achromobacter-deleyi_A
RS_GCF_013267355_Bacteria	Proteobacteria_Gammaproteobacteria_Burkholderiales_Burkholderiaceae_Achromobacter_Achromobacter-pestifer_A
RS_GCF_014170335_Bacteria	Proteobacteria_Gammaproteobacteria_Burkholderiales_Burkholderiaceae_Achromobacter_Achromobacter-sp014170335
RS_GCF_000165835_Bacteria	Proteobacteria_Gammaproteobacteria_Burkholderiales_Burkholderiaceae_Achromobacter_Achromobacter-xylosoxidans_B
RS_GCF_000219915_Bacteria	Proteobacteria_Gammaproteobacteria_Burkholderiales_Burkholderiaceae_Advenella_Advenella-kashmirensis
RS_GCF_000506985_Bacteria	Proteobacteria_Gammaproteobacteria_Burkholderiales_Burkholderiaceae_Advenella_Advenella-kashmirensis_A
RS_GCF_002810445_Bacteria	Proteobacteria_Gammaproteobacteria_Burkholderiales_Burkholderiaceae_Advenella_Advenella-sp002810445
GB_GCA_905339355_Bacteria	Proteobacteria_Gammaproteobacteria_Burkholderiales_Burkholderiaceae_Albitalea_Albitalea-sp905339355
GB_GCA_017857895_Bacteria	Proteobacteria_Gammaproteobacteria_Burkholderiales_Burkholderiaceae_Algicoccus_Algicoccus-sp017857895
GB_GCA_018054745_Bacteria	Proteobacteria_Gammaproteobacteria_Burkholderiales_Burkholderiaceae_Alicycliphilus_Alicycliphilus-sp018054745
GB_GCA_016213205_Bacteria	Proteobacteria_Gammaproteobacteria_Burkholderiales_Burkholderiaceae_Aquabacterium_A_Aquabacterium_A-sp016213205
GB_GCA_016721465_Bacteria	Proteobacteria_Gammaproteobacteria_Burkholderiales_Burkholderiaceae_Aquabacterium_A_Aquabacterium_A-sp016721465
GB_GCA_017994835_Bacteria	Proteobacteria_Gammaproteobacteria_Burkholderiales_Burkholderiaceae_Aquabacterium_Aquabacterium-sp017994835
GB_GCA_902825995_Bacteria	Proteobacteria_Gammaproteobacteria_Burkholderiales_Burkholderiaceae_CADEEN01_CADEEN01-sp902825995
GB_GCA_902826345_Bacteria	Proteobacteria_Gammaproteobacteria_Burkholderiales_Burkholderiaceae_CADEEN01_CADEEN01-sp902826345
GB_GCA_903830985_Bacteria	Proteobacteria_Gammaproteobacteria_Burkholderiales_Burkholderiaceae_CAIKVZ01_CAIKVZ01-sp903830985
GB_GCA_018063505_Bacteria	Proteobacteria_Gammaproteobacteria_Burkholderiales_Burkholderiaceae_CAISIP01_CAISIP01-sp018063505
GB_GCA_903885415_Bacteria	Proteobacteria_Gammaproteobacteria_Burkholderiales_Burkholderiaceae_CAISIP01_CAISIP01-sp903885415
RS_GCF_002849615_Bacteria	Proteobacteria_Gammaproteobacteria_Burkholderiales_Burkholderiaceae_Candidimonas_A_Candidimonas_A-sp002849615
GB_GCA_013416485_Bacteria	Proteobacteria_Gammaproteobacteria_Burkholderiales_Burkholderiaceae_Candidimonas_A_Candidimonas_A-sp013416485
GB_GCA_017983955_Bacteria	Proteobacteria_Gammaproteobacteria_Burkholderiales_Burkholderiaceae_Candidimonas_A_Candidimonas_A-sp017983955
RS_GCF_019166065_Bacteria	Proteobacteria_Gammaproteobacteria_Burkholderiales_Burkholderiaceae_Candidimonas_Candidimonas-humi
RS_GCF_002209565_Bacteria	Proteobacteria_Gammaproteobacteria_Burkholderiales_Burkholderiaceae_Candidimonas_Candidimonas-nitroreducens
RS_GCF_000484635_Bacteria	Proteobacteria_Gammaproteobacteria_Burkholderiales_Burkholderiaceae_Comamonas_C_Comamonas_C-badia
GB_GCA_001724135_Bacteria	Proteobacteria_Gammaproteobacteria_Burkholderiales_Burkholderiaceae_Comamonas_C_Comamonas_C-sp001724135
RS_GCF_007954405_Bacteria	Proteobacteria_Gammaproteobacteria_Burkholderiales_Burkholderiaceae_Comamonas_C_Comamonas_C-sp007954405
RS_GCF_019195435_Bacteria	Proteobacteria_Gammaproteobacteria_Burkholderiales_Burkholderiaceae_Comamonas_C_Comamonas_C-sp019195435
RS_GCF_000429845_Bacteria	Proteobacteria_Gammaproteobacteria_Burkholderiales_Burkholderiaceae_Comamonas_Comamonas-composti
RS_GCF_002754475_Bacteria	Proteobacteria_Gammaproteobacteria_Burkholderiales_Burkholderiaceae_Comamonas_Comamonas-sp002754475
RS_GCF_018413525_Bacteria	Proteobacteria_Gammaproteobacteria_Burkholderiales_Burkholderiaceae_Comamonas_Comamonas-sp018413525
RS_GCF_000292345_Bacteria	Proteobacteria_Gammaproteobacteria_Burkholderiales_Burkholderiaceae_Cupriavidus_Cupriavidus-sp000292345
GB_GCA_903828535_Bacteria	Proteobacteria_Gammaproteobacteria_Burkholderiales_Burkholderiaceae_Curvibacter_Curvibacter-sp903828535
RS_GCF_011305535_Bacteria	Proteobacteria_Gammaproteobacteria_Burkholderiales_Burkholderiaceae_Diaphorobacter_A_Diaphorobacter_A-sp011305535
RS_GCF_015354245_Bacteria	Proteobacteria_Gammaproteobacteria_Burkholderiales_Burkholderiaceae_Diaphorobacter_A_Diaphorobacter_A-sp015354245
RS_GCF_000335815_Bacteria	Proteobacteria_Gammaproteobacteria_Burkholderiales_Burkholderiaceae_Duganella_Duganella-sp000335815
GB_GCA_000381565_Bacteria	Proteobacteria_Gammaproteobacteria_Burkholderiales_Burkholderiaceae_Duganella_Duganella-sp000381565
RS_GCF_003416895_Bacteria	Proteobacteria_Gammaproteobacteria_Burkholderiales_Burkholderiaceae_Duganella_Duganella-sp003416895
RS_GCF_009380215_Bacteria	Proteobacteria_Gammaproteobacteria_Burkholderiales_Burkholderiaceae_Duganella_Duganella-sp009380215
GB_GCA_017998735_Bacteria	Proteobacteria_Gammaproteobacteria_Burkholderiales_Burkholderiaceae_Giesbergeria_Giesbergeria-sp017998735
RS_GCF_003417535_Bacteria	Proteobacteria_Gammaproteobacteria_Burkholderiales_Burkholderiaceae_Hydrogenophaga_Hydrogenophaga-borbori
RS_GCF_001571145_Bacteria	Proteobacteria_Gammaproteobacteria_Burkholderiales_Burkholderiaceae_Hydrogenophaga_Hydrogenophaga-flava
RS_GCF_000723405_Bacteria	Proteobacteria_Gammaproteobacteria_Burkholderiales_Burkholderiaceae_Hydrogenophaga_Hydrogenophaga-intermedia
RS_GCF_016909585_Bacteria	Proteobacteria_Gammaproteobacteria_Burkholderiales_Burkholderiaceae_Hydrogenophaga_Hydrogenophaga-laconesensis
RS_GCF_001571225_Bacteria	Proteobacteria_Gammaproteobacteria_Burkholderiales_Burkholderiaceae_Hydrogenophaga_Hydrogenophaga-palleronii
RS_GCF_001428625_Bacteria	Proteobacteria_Gammaproteobacteria_Burkholderiales_Burkholderiaceae_Hydrogenophaga_Hydrogenophaga-sp001428625
RS_GCF_001713375_Bacteria	Proteobacteria_Gammaproteobacteria_Burkholderiales_Burkholderiaceae_Hydrogenophaga_Hydrogenophaga-sp001713375
RS_GCF_002127215_Bacteria	Proteobacteria_Gammaproteobacteria_Burkholderiales_Burkholderiaceae_Hydrogenophaga_Hydrogenophaga-sp002127215
RS_GCF_002127265_Bacteria	Proteobacteria_Gammaproteobacteria_Burkholderiales_Burkholderiaceae_Hydrogenophaga_Hydrogenophaga-sp002127265
GB_GCA_002840835_Bacteria	Proteobacteria_Gammaproteobacteria_Burkholderiales_Burkholderiaceae_Hydrogenophaga_Hydrogenophaga-sp002840835
GB_GCA_003241965_Bacteria	Proteobacteria_Gammaproteobacteria_Burkholderiales_Burkholderiaceae_Hydrogenophaga_Hydrogenophaga-sp003241965
GB_GCA_003599455_Bacteria	Proteobacteria_Gammaproteobacteria_Burkholderiales_Burkholderiaceae_Hydrogenophaga_Hydrogenophaga-sp003599455
RS_GCF_005503365_Bacteria	Proteobacteria_Gammaproteobacteria_Burkholderiales_Burkholderiaceae_Hydrogenophaga_Hydrogenophaga-sp005503365
RS_GCF_009859475_Bacteria	Proteobacteria_Gammaproteobacteria_Burkholderiales_Burkholderiaceae_Hydrogenophaga_Hydrogenophaga-sp009859475
RS_GCF_010104355_Bacteria	Proteobacteria_Gammaproteobacteria_Burkholderiales_Burkholderiaceae_Hydrogenophaga_Hydrogenophaga-sp010104355
RS_GCF_011388215_Bacteria	Proteobacteria_Gammaproteobacteria_Burkholderiales_Burkholderiaceae_Hydrogenophaga_Hydrogenophaga-sp011388215
GB_GCA_011391745_Bacteria	Proteobacteria_Gammaproteobacteria_Burkholderiales_Burkholderiaceae_Hydrogenophaga_Hydrogenophaga-sp011391745
GB_GCA_011772445_Bacteria	Proteobacteria_Gammaproteobacteria_Burkholderiales_Burkholderiaceae_Hydrogenophaga_Hydrogenophaga-sp011772445
GB_GCA_013823485_Bacteria	Proteobacteria_Gammaproteobacteria_Burkholderiales_Burkholderiaceae_Hydrogenophaga_Hydrogenophaga-sp013823485
GB_GCA_016741995_Bacteria	Proteobacteria_Gammaproteobacteria_Burkholderiales_Burkholderiaceae_Hydrogenophaga_Hydrogenophaga-sp016741995
GB_GCA_016790705_Bacteria	Proteobacteria_Gammaproteobacteria_Burkholderiales_Burkholderiaceae_Hydrogenophaga_Hydrogenophaga-sp016790705
GB_GCA_018780075_Bacteria	Proteobacteria_Gammaproteobacteria_Burkholderiales_Burkholderiaceae_Hydrogenophaga_Hydrogenophaga-sp018780075
GB_GCA_018993155_Bacteria	Proteobacteria_Gammaproteobacteria_Burkholderiales_Burkholderiaceae_Hydrogenophaga_Hydrogenophaga-sp018993155
GB_GCA_003500955_Bacteria	Proteobacteria_Gammaproteobacteria_Burkholderiales_Burkholderiaceae_Hylemonella_Hylemonella-sp003500955
RS_GCF_018069865_Bacteria	Proteobacteria_Gammaproteobacteria_Burkholderiales_Burkholderiaceae_Ideonella_Ideonella-paludis
RS_GCF_000333615_Bacteria	Proteobacteria_Gammaproteobacteria_Burkholderiales_Burkholderiaceae_Ideonella_Ideonella-sp000333615
GB_GCA_004359425_Bacteria	Proteobacteria_Gammaproteobacteria_Burkholderiales_Burkholderiaceae_Ideonella_Ideonella-sp004359425
GB_GCA_018780145_Bacteria	Proteobacteria_Gammaproteobacteria_Burkholderiales_Burkholderiaceae_Ideonella_Ideonella-sp018780145
GB_GCA_014879655_Bacteria	Proteobacteria_Gammaproteobacteria_Burkholderiales_Burkholderiaceae_JAABQG01_JAABQG01-sp014879655
GB_GCA_013298815_Bacteria	Proteobacteria_Gammaproteobacteria_Burkholderiales_Burkholderiaceae_JAAFJR01_JAAFJR01-sp013298815
GB_GCA_013298945_Bacteria	Proteobacteria_Gammaproteobacteria_Burkholderiales_Burkholderiaceae_JAAFJR01_JAAFJR01-sp013298945
GB_GCA_016702605_Bacteria	Proteobacteria_Gammaproteobacteria_Burkholderiales_Burkholderiaceae_JADJDQ01_JADJDQ01-sp016702605
RS_GCF_000019785_Bacteria	Proteobacteria_Gammaproteobacteria_Burkholderiales_Burkholderiaceae_Leptothrix_Leptothrix-cholodnii
RS_GCF_004216565_Bacteria	Proteobacteria_Gammaproteobacteria_Burkholderiales_Burkholderiaceae_Leptothrix_Leptothrix-mobilis
RS_GCF_005871185_Bacteria	Proteobacteria_Gammaproteobacteria_Burkholderiales_Burkholderiaceae_Limnobacter_Limnobacter-alexandrii
RS_GCF_000170915_Bacteria	Proteobacteria_Gammaproteobacteria_Burkholderiales_Burkholderiaceae_Limnobacter_Limnobacter-sp000170915
GB_GCA_001601825_Bacteria	Proteobacteria_Gammaproteobacteria_Burkholderiales_Burkholderiaceae_Limnobacter_Limnobacter-sp001601825
RS_GCF_013004065_Bacteria	Proteobacteria_Gammaproteobacteria_Burkholderiales_Burkholderiaceae_Limnobacter_Limnobacter-sp002954425
GB_GCA_018812945_Bacteria	Proteobacteria_Gammaproteobacteria_Burkholderiales_Burkholderiaceae_Limnobacter_Limnobacter-sp018812945
GB_GCA_018815245_Bacteria	Proteobacteria_Gammaproteobacteria_Burkholderiales_Burkholderiaceae_Limnobacter_Limnobacter-sp018815245
RS_GCF_902506325_Bacteria	Proteobacteria_Gammaproteobacteria_Burkholderiales_Burkholderiaceae_Limnobacter_Limnobacter-sp902506325
GB_GCA_004291335_Bacteria	Proteobacteria_Gammaproteobacteria_Burkholderiales_Burkholderiaceae_Limnobacter_Limnobacter-thiooxidans
RS_GCF_001270065_Bacteria	Proteobacteria_Gammaproteobacteria_Burkholderiales_Burkholderiaceae_Limnohabitans_A_Limnohabitans_A-planktonicus
RS_GCF_000293865_Bacteria	Proteobacteria_Gammaproteobacteria_Burkholderiales_Burkholderiaceae_Limnohabitans_A_Limnohabitans_A-sp000293865
GB_GCA_005789685_Bacteria	Proteobacteria_Gammaproteobacteria_Burkholderiales_Burkholderiaceae_Limnohabitans_A_Limnohabitans_A-sp005789685
GB_GCA_009928125_Bacteria	Proteobacteria_Gammaproteobacteria_Burkholderiales_Burkholderiaceae_Limnohabitans_A_Limnohabitans_A-sp009928125
GB_GCA_903894995_Bacteria	Proteobacteria_Gammaproteobacteria_Burkholderiales_Burkholderiaceae_Limnohabitans_A_Limnohabitans_A-sp903894995
GB_GCA_903961095_Bacteria	Proteobacteria_Gammaproteobacteria_Burkholderiales_Burkholderiaceae_Limnohabitans_A_Limnohabitans_A-sp903961095
GB_GCA_005789825_Bacteria	Proteobacteria_Gammaproteobacteria_Burkholderiales_Burkholderiaceae_Limnohabitans_Limnohabitans-sp005789825
GB_GCA_009927195_Bacteria	Proteobacteria_Gammaproteobacteria_Burkholderiales_Burkholderiaceae_Limnohabitans_Limnohabitans-sp009927195
GB_GCA_018883305_Bacteria	Proteobacteria_Gammaproteobacteria_Burkholderiales_Burkholderiaceae_Limnohabitans_Limnohabitans-sp018883305
GB_GCA_013817365_Bacteria	Proteobacteria_Gammaproteobacteria_Burkholderiales_Burkholderiaceae_Methylibium_Methylibium-sp013817365
GB_GCA_902826655_Bacteria	Proteobacteria_Gammaproteobacteria_Burkholderiales_Burkholderiaceae_Methylibium_Methylibium-sp902826655
GB_GCA_002292845_Bacteria	Proteobacteria_Gammaproteobacteria_Burkholderiales_Burkholderiaceae_NBD-18_NBD-18-sp002292845
GB_GCA_002737415_Bacteria	Proteobacteria_Gammaproteobacteria_Burkholderiales_Burkholderiaceae_NBD-18_NBD-18-sp002737415
GB_GCA_013205565_Bacteria	Proteobacteria_Gammaproteobacteria_Burkholderiales_Burkholderiaceae_NBD-18_NBD-18-sp013205565
GB_GCA_903821335_Bacteria	Proteobacteria_Gammaproteobacteria_Burkholderiales_Burkholderiaceae_NBD-18_NBD-18-sp903821335
GB_GCA_903847325_Bacteria	Proteobacteria_Gammaproteobacteria_Burkholderiales_Burkholderiaceae_NBD-18_NBD-18-sp903847325
GB_GCA_903894155_Bacteria	Proteobacteria_Gammaproteobacteria_Burkholderiales_Burkholderiaceae_NBD-18_NBD-18-sp903894155
GB_GCA_903924715_Bacteria	Proteobacteria_Gammaproteobacteria_Burkholderiales_Burkholderiaceae_NBD-18_NBD-18-sp903924715
GB_GCA_015999985_Bacteria	Proteobacteria_Gammaproteobacteria_Burkholderiales_Burkholderiaceae_Ottowia_Ottowia-sp015999985
GB_GCA_016702555_Bacteria	Proteobacteria_Gammaproteobacteria_Burkholderiales_Burkholderiaceae_Ottowia_Ottowia-sp016702555
GB_GCA_018060485_Bacteria	Proteobacteria_Gammaproteobacteria_Burkholderiales_Burkholderiaceae_Ottowia_Ottowia-sp018060485
RS_GCF_004346225_Bacteria	Proteobacteria_Gammaproteobacteria_Burkholderiales_Burkholderiaceae_Paralcaligenes_Paralcaligenes-ureilyticus
GB_GCA_018780415_Bacteria	Proteobacteria_Gammaproteobacteria_Burkholderiales_Burkholderiaceae_Paucibacter_A_Paucibacter_A-sp018780415
GB_GCA_003265685_Bacteria	Proteobacteria_Gammaproteobacteria_Burkholderiales_Burkholderiaceae_Piscinibacter_Piscinibacter-caeni
GB_GCA_017983795_Bacteria	Proteobacteria_Gammaproteobacteria_Burkholderiales_Burkholderiaceae_Piscinibacter_Piscinibacter-sp017983795
GB_GCA_002278925_Bacteria	Proteobacteria_Gammaproteobacteria_Burkholderiales_Burkholderiaceae_Polaromonas_Polaromonas-sp002278925
RS_GCF_002379085_Bacteria	Proteobacteria_Gammaproteobacteria_Burkholderiales_Burkholderiaceae_Polaromonas_Polaromonas-sp002379085
RS_GCF_002379095_Bacteria	Proteobacteria_Gammaproteobacteria_Burkholderiales_Burkholderiaceae_Polaromonas_Polaromonas-sp002379095
GB_GCA_012927485_Bacteria	Proteobacteria_Gammaproteobacteria_Burkholderiales_Burkholderiaceae_Polaromonas_Polaromonas-sp012927485
GB_GCA_013205645_Bacteria	Proteobacteria_Gammaproteobacteria_Burkholderiales_Burkholderiaceae_Polaromonas_Polaromonas-sp013205645
RS_GCF_018687595_Bacteria	Proteobacteria_Gammaproteobacteria_Burkholderiales_Burkholderiaceae_Polynucleobacter_Polynucleobacter-asymbioticus_B
RS_GCF_002224225_Bacteria	Proteobacteria_Gammaproteobacteria_Burkholderiales_Burkholderiaceae_Polynucleobacter_Polynucleobacter-cosmopolitanus
GB_GCA_000428385_Bacteria	Proteobacteria_Gammaproteobacteria_Burkholderiales_Burkholderiaceae_Polynucleobacter_Polynucleobacter-sp000428385
RS_GCF_018687455_Bacteria	Proteobacteria_Gammaproteobacteria_Burkholderiales_Burkholderiaceae_Polynucleobacter_Polynucleobacter-sp001870365
RS_GCF_018881655_Bacteria	Proteobacteria_Gammaproteobacteria_Burkholderiales_Burkholderiaceae_Polynucleobacter_Polynucleobacter-sp001889925
GB_GCA_002292975_Bacteria	Proteobacteria_Gammaproteobacteria_Burkholderiales_Burkholderiaceae_Polynucleobacter_Polynucleobacter-sp002292975
GB_GCA_008015455_Bacteria	Proteobacteria_Gammaproteobacteria_Burkholderiales_Burkholderiaceae_Polynucleobacter_Polynucleobacter-sp008015455
RS_GCF_013307225_Bacteria	Proteobacteria_Gammaproteobacteria_Burkholderiales_Burkholderiaceae_Polynucleobacter_Polynucleobacter-sp013307225
RS_GCF_018687095_Bacteria	Proteobacteria_Gammaproteobacteria_Burkholderiales_Burkholderiaceae_Polynucleobacter_Polynucleobacter-sp018687095
RS_GCF_018687195_Bacteria	Proteobacteria_Gammaproteobacteria_Burkholderiales_Burkholderiaceae_Polynucleobacter_Polynucleobacter-sp018687195
RS_GCF_018687495_Bacteria	Proteobacteria_Gammaproteobacteria_Burkholderiales_Burkholderiaceae_Polynucleobacter_Polynucleobacter-sp018687495
RS_GCF_018687515_Bacteria	Proteobacteria_Gammaproteobacteria_Burkholderiales_Burkholderiaceae_Polynucleobacter_Polynucleobacter-sp018687515
RS_GCF_018687615_Bacteria	Proteobacteria_Gammaproteobacteria_Burkholderiales_Burkholderiaceae_Polynucleobacter_Polynucleobacter-sp018687615
RS_GCF_018882385_Bacteria	Proteobacteria_Gammaproteobacteria_Burkholderiales_Burkholderiaceae_Polynucleobacter_Polynucleobacter-sp018882385
GB_GCA_903826775_Bacteria	Proteobacteria_Gammaproteobacteria_Burkholderiales_Burkholderiaceae_Polynucleobacter_Polynucleobacter-sp903826775
GB_GCA_903827075_Bacteria	Proteobacteria_Gammaproteobacteria_Burkholderiales_Burkholderiaceae_Polynucleobacter_Polynucleobacter-sp903827075
GB_GCA_903835865_Bacteria	Proteobacteria_Gammaproteobacteria_Burkholderiales_Burkholderiaceae_Polynucleobacter_Polynucleobacter-sp903835865
GB_GCA_903845455_Bacteria	Proteobacteria_Gammaproteobacteria_Burkholderiales_Burkholderiaceae_Polynucleobacter_Polynucleobacter-sp903845455
RS_GCF_018881925_Bacteria	Proteobacteria_Gammaproteobacteria_Burkholderiales_Burkholderiaceae_Polynucleobacter_Polynucleobacter-sp903880555
RS_GCF_900187875_Bacteria	Proteobacteria_Gammaproteobacteria_Burkholderiales_Burkholderiaceae_Polynucleobacter_Polynucleobacter-victoriensis
RS_GCF_009720865_Bacteria	Proteobacteria_Gammaproteobacteria_Burkholderiales_Burkholderiaceae_Pseudoduganella_Pseudoduganella-ginsengisoli
RS_GCF_004153455_Bacteria	Proteobacteria_Gammaproteobacteria_Burkholderiales_Burkholderiaceae_Pusillimonas_B_Pusillimonas_B-ginsengisoli
RS_GCF_005239165_Bacteria	Proteobacteria_Gammaproteobacteria_Burkholderiales_Burkholderiaceae_Pusillimonas_B_Pusillimonas_B-ginsengisoli_A
RS_GCF_009857885_Bacteria	Proteobacteria_Gammaproteobacteria_Burkholderiales_Burkholderiaceae_Pusillimonas_B_Pusillimonas_B-sp009857885
GB_GCA_012274225_Bacteria	Proteobacteria_Gammaproteobacteria_Burkholderiales_Burkholderiaceae_Ramlibacter_Ramlibacter-sp012274225
RS_GCF_015831345_Bacteria	Proteobacteria_Gammaproteobacteria_Burkholderiales_Burkholderiaceae_Ramlibacter_Ramlibacter-sp015831345
GB_GCA_004322085_Bacteria	Proteobacteria_Gammaproteobacteria_Burkholderiales_Burkholderiaceae_Rhodoferax_A_Rhodoferax_A-sp004322085
RS_GCF_001938565_Bacteria	Proteobacteria_Gammaproteobacteria_Burkholderiales_Burkholderiaceae_Rhodoferax_Rhodoferax-antarcticus
GB_GCA_009693325_Bacteria	Proteobacteria_Gammaproteobacteria_Burkholderiales_Burkholderiaceae_Rhodoferax_Rhodoferax-sp009693325
GB_GCA_010365055_Bacteria	Proteobacteria_Gammaproteobacteria_Burkholderiales_Burkholderiaceae_Rhodoferax_Rhodoferax-sp010365055
GB_GCA_012927445_Bacteria	Proteobacteria_Gammaproteobacteria_Burkholderiales_Burkholderiaceae_Rhodoferax_Rhodoferax-sp012927445
GB_GCA_014190675_Bacteria	Proteobacteria_Gammaproteobacteria_Burkholderiales_Burkholderiaceae_Rhodoferax_Rhodoferax-sp014190675
GB_GCA_017997975_Bacteria	Proteobacteria_Gammaproteobacteria_Burkholderiales_Burkholderiaceae_Rhodoferax_Rhodoferax-sp017997975
GB_GCA_903853895_Bacteria	Proteobacteria_Gammaproteobacteria_Burkholderiales_Burkholderiaceae_Rhodoferax_Rhodoferax-sp903853895
GB_GCA_903870955_Bacteria	Proteobacteria_Gammaproteobacteria_Burkholderiales_Burkholderiaceae_Rhodoferax_Rhodoferax-sp903870955
GB_GCA_903897925_Bacteria	Proteobacteria_Gammaproteobacteria_Burkholderiales_Burkholderiaceae_Rhodoferax_Rhodoferax-sp903897925
GB_GCA_903905735_Bacteria	Proteobacteria_Gammaproteobacteria_Burkholderiales_Burkholderiaceae_Rhodoferax_Rhodoferax-sp903905735
GB_GCA_903924955_Bacteria	Proteobacteria_Gammaproteobacteria_Burkholderiales_Burkholderiaceae_Rhodoferax_Rhodoferax-sp903924955
GB_GCA_903944555_Bacteria	Proteobacteria_Gammaproteobacteria_Burkholderiales_Burkholderiaceae_Rhodoferax_Rhodoferax-sp903944555
GB_GCA_903945325_Bacteria	Proteobacteria_Gammaproteobacteria_Burkholderiales_Burkholderiaceae_Rhodoferax_Rhodoferax-sp903945325
GB_GCA_903951445_Bacteria	Proteobacteria_Gammaproteobacteria_Burkholderiales_Burkholderiaceae_Rhodoferax_Rhodoferax-sp903951445
GB_GCA_903954045_Bacteria	Proteobacteria_Gammaproteobacteria_Burkholderiales_Burkholderiaceae_Rhodoferax_Rhodoferax-sp903954045
RS_GCF_004016515_Bacteria	Proteobacteria_Gammaproteobacteria_Burkholderiales_Burkholderiaceae_Rubrivivax_Rubrivivax-albus
GB_GCA_016719535_Bacteria	Proteobacteria_Gammaproteobacteria_Burkholderiales_Burkholderiaceae_Rubrivivax_Rubrivivax-sp016719535
GB_GCA_016790225_Bacteria	Proteobacteria_Gammaproteobacteria_Burkholderiales_Burkholderiaceae_Rubrivivax_Rubrivivax-sp016790225
GB_GCA_016790425_Bacteria	Proteobacteria_Gammaproteobacteria_Burkholderiales_Burkholderiaceae_Rubrivivax_Rubrivivax-sp016790425
GB_GCA_903828235_Bacteria	Proteobacteria_Gammaproteobacteria_Burkholderiales_Burkholderiaceae_Rubrivivax_Rubrivivax-sp903828235
GB_GCA_903834645_Bacteria	Proteobacteria_Gammaproteobacteria_Burkholderiales_Burkholderiaceae_Rubrivivax_Rubrivivax-sp903834645
GB_GCA_903876715_Bacteria	Proteobacteria_Gammaproteobacteria_Burkholderiales_Burkholderiaceae_Rubrivivax_Rubrivivax-sp903876715
GB_GCA_903885585_Bacteria	Proteobacteria_Gammaproteobacteria_Burkholderiales_Burkholderiaceae_Rubrivivax_Rubrivivax-sp903885585
GB_GCA_903938815_Bacteria	Proteobacteria_Gammaproteobacteria_Burkholderiales_Burkholderiaceae_Rubrivivax_Rubrivivax-sp903938815
GB_GCA_001724315_Bacteria	Proteobacteria_Gammaproteobacteria_Burkholderiales_Burkholderiaceae_SCN-69-89_SCN-69-89-sp001724315
GB_GCA_017307915_Bacteria	Proteobacteria_Gammaproteobacteria_Burkholderiales_Burkholderiaceae_SCN-69-89_SCN-69-89-sp017307915
RS_GCF_000696225_Bacteria	Proteobacteria_Gammaproteobacteria_Burkholderiales_Burkholderiaceae_Serpentinomonas_Serpentinomonas-sp000696225
GB_GCA_010024875_Bacteria	Proteobacteria_Gammaproteobacteria_Burkholderiales_Burkholderiaceae_SYFN01_SYFN01-sp010024875
GB_GCA_018882935_Bacteria	Proteobacteria_Gammaproteobacteria_Burkholderiales_Burkholderiaceae_SYFN01_SYFN01-sp018882935
GB_GCA_900299005_Bacteria	Proteobacteria_Gammaproteobacteria_Burkholderiales_Burkholderiaceae_SYFN01_SYFN01-sp900299005
GB_GCA_903846425_Bacteria	Proteobacteria_Gammaproteobacteria_Burkholderiales_Burkholderiaceae_SYFN01_SYFN01-sp903846425
GB_GCA_903872555_Bacteria	Proteobacteria_Gammaproteobacteria_Burkholderiales_Burkholderiaceae_SYFN01_SYFN01-sp903872555
GB_GCA_002342295_Bacteria	Proteobacteria_Gammaproteobacteria_Burkholderiales_Burkholderiaceae_UBA2463_UBA2463-sp002342295
GB_GCA_900299025_Bacteria	Proteobacteria_Gammaproteobacteria_Burkholderiales_Burkholderiaceae_UBA3064_UBA3064-sp005787245
RS_GCF_003201815_Bacteria	Proteobacteria_Gammaproteobacteria_Burkholderiales_Burkholderiaceae_Undibacterium_Undibacterium-pigrum
GB_GCA_002482715_Bacteria	Proteobacteria_Gammaproteobacteria_Burkholderiales_Burkholderiaceae_Undibacterium_Undibacterium-sp002482715
RS_GCF_009937955_Bacteria	Proteobacteria_Gammaproteobacteria_Burkholderiales_Burkholderiaceae_Undibacterium_Undibacterium-sp009937955
RS_GCF_009937975_Bacteria	Proteobacteria_Gammaproteobacteria_Burkholderiales_Burkholderiaceae_Undibacterium_Undibacterium-sp009937975
RS_GCF_014284125_Bacteria	Proteobacteria_Gammaproteobacteria_Burkholderiales_Burkholderiaceae_Undibacterium_Undibacterium-sp014284125
RS_GCF_014284335_Bacteria	Proteobacteria_Gammaproteobacteria_Burkholderiales_Burkholderiaceae_Undibacterium_Undibacterium-sp014284335
GB_GCA_016200845_Bacteria	Proteobacteria_Gammaproteobacteria_Burkholderiales_Burkholderiaceae_Undibacterium_Undibacterium-sp016200845
GB_GCA_016200895_Bacteria	Proteobacteria_Gammaproteobacteria_Burkholderiales_Burkholderiaceae_Undibacterium_Undibacterium-sp016200895
GB_GCA_010365205_Bacteria	Proteobacteria_Gammaproteobacteria_Burkholderiales_Casimicrobiaceae_CAIWHR01_CAIWHR01-sp010365205
GB_GCA_016790635_Bacteria	Proteobacteria_Gammaproteobacteria_Burkholderiales_JAEUOS01_JAEUOS01_JAEUOS01-sp016790635
GB_GCA_016790695_Bacteria	Proteobacteria_Gammaproteobacteria_Burkholderiales_JAEUOS01_JAEUOS01_JAEUOS01-sp016790695
GB_GCA_006844635_Bacteria	Proteobacteria_Gammaproteobacteria_Burkholderiales_Methylophilaceae_GCA-2401735_GCA-2401735-sp006844635
GB_GCA_016709675_Bacteria	Proteobacteria_Gammaproteobacteria_Burkholderiales_Rhodocyclaceae_Accumulibacter_Accumulibacter-sp016709675
GB_GCA_017302435_Bacteria	Proteobacteria_Gammaproteobacteria_Burkholderiales_Rhodocyclaceae_Accumulibacter_Accumulibacter-sp017302435
RS_GCF_006496635_Bacteria	Proteobacteria_Gammaproteobacteria_Burkholderiales_Rhodocyclaceae_Azoarcus_Azoarcus-sp006496635
GB_GCA_011391255_Bacteria	Proteobacteria_Gammaproteobacteria_Burkholderiales_Rhodocyclaceae_Azonexus_Azonexus-sp011391255
GB_GCA_016714975_Bacteria	Proteobacteria_Gammaproteobacteria_Burkholderiales_Rhodocyclaceae_Azonexus_Azonexus-sp016714975
GB_GCA_016790885_Bacteria	Proteobacteria_Gammaproteobacteria_Burkholderiales_Rhodocyclaceae_Azonexus_Azonexus-sp016790885
GB_GCA_903951825_Bacteria	Proteobacteria_Gammaproteobacteria_Burkholderiales_Rhodocyclaceae_Azonexus_Azonexus-sp903951825
RS_GCF_000429665_Bacteria	Proteobacteria_Gammaproteobacteria_Burkholderiales_Rhodocyclaceae_Azovibrio_Azovibrio-restrictus
GB_GCA_003252145_Bacteria	Proteobacteria_Gammaproteobacteria_Burkholderiales_Rhodocyclaceae_Azovibrio_Azovibrio-restrictus_A
GB_GCA_018883265_Bacteria	Proteobacteria_Gammaproteobacteria_Burkholderiales_Rhodocyclaceae_Fluviibacter_Fluviibacter-sp018883265
RS_GCF_019049855_Bacteria	Proteobacteria_Gammaproteobacteria_Burkholderiales_Rhodocyclaceae_Hydrogenophilus_Hydrogenophilus-sp019049855
RS_GCF_003574215_Bacteria	Proteobacteria_Gammaproteobacteria_Burkholderiales_Rhodocyclaceae_Hydrogenophilus_Hydrogenophilus-thermoluteolus
GB_GCA_016718525_Bacteria	Proteobacteria_Gammaproteobacteria_Burkholderiales_Rhodocyclaceae_JADJEF01_JADJEF01-sp016718525
GB_GCA_016721505_Bacteria	Proteobacteria_Gammaproteobacteria_Burkholderiales_Rhodocyclaceae_JADJEF01_JADJEF01-sp016721505
GB_GCA_016791105_Bacteria	Proteobacteria_Gammaproteobacteria_Burkholderiales_Rhodocyclaceae_JAEUNM01_JAEUNM01-sp016791105
GB_GCA_016235745_Bacteria	Proteobacteria_Gammaproteobacteria_Burkholderiales_Rhodocyclaceae_Tepidiphilus_Tepidiphilus-sp016235745
RS_GCF_001591165_Bacteria	Proteobacteria_Gammaproteobacteria_Burkholderiales_Rhodocyclaceae_Thauera_Thauera-butanivorans
GB_GCA_003446655_Bacteria	Proteobacteria_Gammaproteobacteria_Burkholderiales_Rhodocyclaceae_Thauera_Thauera-sp003446655
RS_GCF_006539865_Bacteria	Proteobacteria_Gammaproteobacteria_Burkholderiales_Rhodocyclaceae_Zoogloea_Zoogloea-ramigera
GB_GCA_016703645_Bacteria	Proteobacteria_Gammaproteobacteria_Burkholderiales_Rhodocyclaceae_Zoogloea_Zoogloea-sp008011925
RS_GCF_009469605_Bacteria	Proteobacteria_Gammaproteobacteria_Burkholderiales_Rhodocyclaceae_Zoogloea_Zoogloea-sp009469605
GB_GCA_015657735_Bacteria	Proteobacteria_Gammaproteobacteria_Burkholderiales_Rhodocyclaceae_Zoogloea_Zoogloea-sp015657735
GB_GCA_016789125_Bacteria	Proteobacteria_Gammaproteobacteria_Burkholderiales_Rhodocyclaceae_Zoogloea_Zoogloea-sp016789125
GB_GCA_017302315_Bacteria	Proteobacteria_Gammaproteobacteria_Burkholderiales_Rhodocyclaceae_Zoogloea_Zoogloea-sp017302315
GB_GCA_903909415_Bacteria	Proteobacteria_Gammaproteobacteria_Burkholderiales_SG8-39_CAIVVS01_CAIVVS01-sp903909415
GB_GCA_018241645_Bacteria	Proteobacteria_Gammaproteobacteria_Burkholderiales_SG8-39_SZAS-79_SZAS-79-sp018241645
GB_GCA_002412495_Bacteria	Proteobacteria_Gammaproteobacteria_Burkholderiales_SG8-41_UBA5216_UBA5216-sp002412495
GB_GCA_902825845_Bacteria	Proteobacteria_Gammaproteobacteria_Burkholderiales_SG8-41_UBA5216_UBA5216-sp902825845
GB_GCA_903893565_Bacteria	Proteobacteria_Gammaproteobacteria_Burkholderiales_SG8-41_UBA5216_UBA5216-sp903893565
GB_GCA_014378085_Bacteria	Proteobacteria_Gammaproteobacteria_Burkholderiales_Usitatibacteraceae_UKL13-2_UKL13-2-sp014378085
GB_GCA_002401655_Bacteria	Proteobacteria_Gammaproteobacteria_Enterobacterales_Kangiellaceae_GCA-002733465_GCA-002733465-sp002401655
GB_GCA_002733465_Bacteria	Proteobacteria_Gammaproteobacteria_Enterobacterales_Kangiellaceae_GCA-002733465_GCA-002733465-sp002733465
GB_GCA_905479925_Bacteria	Proteobacteria_Gammaproteobacteria_Enterobacterales_Kangiellaceae_GCA-002733465_GCA-002733465-sp905479925
GB_GCA_009692265_Bacteria	Proteobacteria_Gammaproteobacteria_Ga0077536_Ga0077536_CAIKBL01_CAIKBL01-sp009692265
GB_GCA_016874535_Bacteria	Proteobacteria_Gammaproteobacteria_Ga0077536_Ga0077536_CAIKBL01_CAIKBL01-sp016874535
GB_GCA_016719885_Bacteria	Proteobacteria_Gammaproteobacteria_Ga0077536_Ga0077536_JADJYF01_JADJYF01-sp016719885
GB_GCA_002390205_Bacteria	Proteobacteria_Gammaproteobacteria_Ga0077536_Ga0077536_UBA4457_UBA4457-sp002390205
GB_GCA_902557415_Bacteria	Proteobacteria_Gammaproteobacteria_Ga0077536_Ga0077536_UBA4457_UBA4457-sp902557415
GB_GCA_002292285_Bacteria	Proteobacteria_Gammaproteobacteria_Ga0077536_Ga0077536_UBA981_UBA981-sp002292285
GB_GCA_002281735_Bacteria	Proteobacteria_Gammaproteobacteria_Halothiobacillales_Halothiobacillaceae_28-57-27_28-57-27-sp002281735
GB_GCA_013373515_Bacteria	Proteobacteria_Gammaproteobacteria_JABXHR01_JABXHR01_JABXHR01_JABXHR01-sp013373515
GB_GCA_002101205_Bacteria	Proteobacteria_Gammaproteobacteria_Methylococcales_Cycloclasticaceae_Cycloclasticus_Cycloclasticus-sp002101205
GB_GCA_002101225_Bacteria	Proteobacteria_Gammaproteobacteria_Methylococcales_Cycloclasticaceae_Cycloclasticus_Cycloclasticus-sp002101225
GB_GCA_002101235_Bacteria	Proteobacteria_Gammaproteobacteria_Methylococcales_Cycloclasticaceae_Cycloclasticus_Cycloclasticus-sp002101235
GB_GCA_002162705_Bacteria	Proteobacteria_Gammaproteobacteria_Methylococcales_Cycloclasticaceae_Cycloclasticus_Cycloclasticus-sp002162705
GB_GCA_002292375_Bacteria	Proteobacteria_Gammaproteobacteria_Methylococcales_Cycloclasticaceae_Cycloclasticus_Cycloclasticus-sp002292375
GB_GCA_002733135_Bacteria	Proteobacteria_Gammaproteobacteria_Methylococcales_Cycloclasticaceae_Cycloclasticus_Cycloclasticus-sp002733135
GB_GCA_012959695_Bacteria	Proteobacteria_Gammaproteobacteria_Methylococcales_Cycloclasticaceae_Cycloclasticus_Cycloclasticus-sp012959695
GB_GCA_012960055_Bacteria	Proteobacteria_Gammaproteobacteria_Methylococcales_Cycloclasticaceae_Cycloclasticus_Cycloclasticus-sp012960055
GB_GCA_016764415_Bacteria	Proteobacteria_Gammaproteobacteria_Methylococcales_Cycloclasticaceae_Cycloclasticus_Cycloclasticus-sp016764415
GB_GCA_018066825_Bacteria	Proteobacteria_Gammaproteobacteria_Methylococcales_Cycloclasticaceae_Cycloclasticus_Cycloclasticus-sp018066825
RS_GCF_005047655_Bacteria	Proteobacteria_Gammaproteobacteria_Nevskiales_Nevskiaceae_CAU-1509_CAU-1509-sp005047655
RS_GCF_900113085_Bacteria	Proteobacteria_Gammaproteobacteria_Nevskiales_Nevskiaceae_Fontimonas_Fontimonas-thermophila
GB_GCA_013823855_Bacteria	Proteobacteria_Gammaproteobacteria_Nevskiales_Nevskiaceae_Nevskia_Nevskia-sp013823855
RS_GCF_004364935_Bacteria	Proteobacteria_Gammaproteobacteria_Nevskiales_Nevskiaceae_Panacagrimonas_Panacagrimonas-perspica
RS_GCF_000711245_Bacteria	Proteobacteria_Gammaproteobacteria_Nevskiales_Nevskiaceae_Polycyclovorans_Polycyclovorans-algicola
GB_GCA_004298465_Bacteria	Proteobacteria_Gammaproteobacteria_Nevskiales_Nevskiaceae_SCRT01_SCRT01-sp004298465
GB_GCA_002733105_Bacteria	Proteobacteria_Gammaproteobacteria_Nitrosococcales_Methylophagaceae_GCA-002733105_GCA-002733105-sp002733105
GB_GCA_013215775_Bacteria	Proteobacteria_Gammaproteobacteria_Nitrosococcales_Methylophagaceae_GCA-002733105_GCA-002733105-sp013215775
GB_GCA_018646825_Bacteria	Proteobacteria_Gammaproteobacteria_Nitrosococcales_Methylophagaceae_GCA-002733105_GCA-002733105-sp018646825
GB_GCA_905181885_Bacteria	Proteobacteria_Gammaproteobacteria_Nitrosococcales_Methylophagaceae_GCA-002733105_GCA-002733105-sp905181885
GB_GCA_905479075_Bacteria	Proteobacteria_Gammaproteobacteria_Nitrosococcales_Methylophagaceae_GCA-002733105_GCA-002733105-sp905479075
GB_GCA_905479985_Bacteria	Proteobacteria_Gammaproteobacteria_Nitrosococcales_Methylophagaceae_GCA-002733105_GCA-002733105-sp905479985
RS_GCF_014904735_Bacteria	Proteobacteria_Gammaproteobacteria_Pseudomonadales_Cellvibrionaceae_Microbulbifer_Microbulbifer-hainanensis
GB_GCA_000169115_Bacteria	Proteobacteria_Gammaproteobacteria_Pseudomonadales_Halieaceae_Luminiphilus_Luminiphilus-sp000169115
GB_GCA_002683335_Bacteria	Proteobacteria_Gammaproteobacteria_Pseudomonadales_Halieaceae_Luminiphilus_Luminiphilus-sp002683335
GB_GCA_008081075_Bacteria	Proteobacteria_Gammaproteobacteria_Pseudomonadales_Halieaceae_Luminiphilus_Luminiphilus-sp008081075
GB_GCA_009886815_Bacteria	Proteobacteria_Gammaproteobacteria_Pseudomonadales_Halieaceae_Luminiphilus_Luminiphilus-sp009886815
GB_GCA_016778045_Bacteria	Proteobacteria_Gammaproteobacteria_Pseudomonadales_Halieaceae_Luminiphilus_Luminiphilus-sp016778045
GB_GCA_902518075_Bacteria	Proteobacteria_Gammaproteobacteria_Pseudomonadales_Halieaceae_Luminiphilus_Luminiphilus-sp902518075
GB_GCA_902520195_Bacteria	Proteobacteria_Gammaproteobacteria_Pseudomonadales_Halieaceae_Luminiphilus_Luminiphilus-sp902520195
GB_GCA_902623175_Bacteria	Proteobacteria_Gammaproteobacteria_Pseudomonadales_Halieaceae_Luminiphilus_Luminiphilus-sp902623175
GB_GCA_902631395_Bacteria	Proteobacteria_Gammaproteobacteria_Pseudomonadales_Halieaceae_Luminiphilus_Luminiphilus-sp902631395
GB_GCA_905479205_Bacteria	Proteobacteria_Gammaproteobacteria_Pseudomonadales_Halieaceae_Luminiphilus_Luminiphilus-sp905479205
RS_GCF_000158175_Bacteria	Proteobacteria_Gammaproteobacteria_Pseudomonadales_Halieaceae_Luminiphilus_Luminiphilus-syltensis
GB_GCA_003230835_Bacteria	Proteobacteria_Gammaproteobacteria_Pseudomonadales_HTCC2089_UBA4421_UBA4421-sp003230835
GB_GCA_013151695_Bacteria	Proteobacteria_Gammaproteobacteria_Pseudomonadales_HTCC2089_UBA4421_UBA4421-sp013151695
GB_GCA_000227525_Bacteria	Proteobacteria_Gammaproteobacteria_Pseudomonadales_Litoricolaceae_HIMB30_HIMB30-sp000227525
GB_GCA_002705795_Bacteria	Proteobacteria_Gammaproteobacteria_Pseudomonadales_Litoricolaceae_HIMB30_HIMB30-sp002705795
GB_GCA_002717305_Bacteria	Proteobacteria_Gammaproteobacteria_Pseudomonadales_Litoricolaceae_HIMB30_HIMB30-sp002717305
GB_GCA_002730235_Bacteria	Proteobacteria_Gammaproteobacteria_Pseudomonadales_Litoricolaceae_HIMB30_HIMB30-sp002730235
GB_GCA_002731015_Bacteria	Proteobacteria_Gammaproteobacteria_Pseudomonadales_Litoricolaceae_HIMB30_HIMB30-sp002731015
GB_GCA_008087055_Bacteria	Proteobacteria_Gammaproteobacteria_Pseudomonadales_Litoricolaceae_HIMB30_HIMB30-sp008087055
GB_GCA_009922705_Bacteria	Proteobacteria_Gammaproteobacteria_Pseudomonadales_Litoricolaceae_HIMB30_HIMB30-sp009922705
GB_GCA_018401755_Bacteria	Proteobacteria_Gammaproteobacteria_Pseudomonadales_Litoricolaceae_HIMB30_HIMB30-sp018401755
GB_GCA_018402605_Bacteria	Proteobacteria_Gammaproteobacteria_Pseudomonadales_Litoricolaceae_HIMB30_HIMB30-sp018402605
GB_GCA_902536515_Bacteria	Proteobacteria_Gammaproteobacteria_Pseudomonadales_Litoricolaceae_HIMB30_HIMB30-sp902536515
RS_GCF_009650135_Bacteria	Proteobacteria_Gammaproteobacteria_Pseudomonadales_Litoricolaceae_Litoricola_Litoricola-lipolytica
RS_GCF_002795845_Bacteria	Proteobacteria_Gammaproteobacteria_Pseudomonadales_Natronospirillaceae_Reinekea_Reinekea-forsetii
RS_GCF_018860385_Bacteria	Proteobacteria_Gammaproteobacteria_Pseudomonadales_Natronospirillaceae_Reinekea_Reinekea-forsetii_A
RS_GCF_003858655_Bacteria	Proteobacteria_Gammaproteobacteria_Pseudomonadales_Nitrincolaceae_Amphritea_Amphritea-balenae
RS_GCF_016592435_Bacteria	Proteobacteria_Gammaproteobacteria_Pseudomonadales_Nitrincolaceae_Amphritea_Amphritea-japonica
GB_GCA_016744155_Bacteria	Proteobacteria_Gammaproteobacteria_Pseudomonadales_Nitrincolaceae_Amphritea_Amphritea-sp016744155
GB_GCA_018067325_Bacteria	Proteobacteria_Gammaproteobacteria_Pseudomonadales_Nitrincolaceae_Amphritea_Amphritea-sp018067325
GB_GCA_002470565_Bacteria	Proteobacteria_Gammaproteobacteria_Pseudomonadales_Nitrincolaceae_ASP10-02a_ASP10-02a-sp002470565
GB_GCA_003521845_Bacteria	Proteobacteria_Gammaproteobacteria_Pseudomonadales_Nitrincolaceae_ASP10-02a_ASP10-02a-sp003521845
GB_GCA_003523085_Bacteria	Proteobacteria_Gammaproteobacteria_Pseudomonadales_Nitrincolaceae_ASP10-02a_ASP10-02a-sp003523085
GB_GCA_016845445_Bacteria	Proteobacteria_Gammaproteobacteria_Pseudomonadales_Nitrincolaceae_ASP10-02a_ASP10-02a-sp016845445
GB_GCA_905182035_Bacteria	Proteobacteria_Gammaproteobacteria_Pseudomonadales_Nitrincolaceae_ASP10-02a_ASP10-02a-sp905182035
RS_GCF_017776525_Bacteria	Proteobacteria_Gammaproteobacteria_Pseudomonadales_Nitrincolaceae_Marinobacterium_Marinobacterium-alkalitolerans
RS_GCF_003014615_Bacteria	Proteobacteria_Gammaproteobacteria_Pseudomonadales_Nitrincolaceae_Marinobacterium_Marinobacterium-halophilum
RS_GCF_012848475_Bacteria	Proteobacteria_Gammaproteobacteria_Pseudomonadales_Nitrincolaceae_Marinobacterium_Marinobacterium-sp012848475
RS_GCF_013283365_Bacteria	Proteobacteria_Gammaproteobacteria_Pseudomonadales_Nitrincolaceae_Marinobacterium_Marinobacterium-sp013283365
GB_GCA_013373575_Bacteria	Proteobacteria_Gammaproteobacteria_Pseudomonadales_Nitrincolaceae_Marinobacterium_Marinobacterium-sp013373575
GB_GCA_018623095_Bacteria	Proteobacteria_Gammaproteobacteria_Pseudomonadales_Nitrincolaceae_Marinobacterium_Marinobacterium-sp018623095
RS_GCF_900155945_Bacteria	Proteobacteria_Gammaproteobacteria_Pseudomonadales_Nitrincolaceae_Marinobacterium_Marinobacterium-stanieri
RS_GCF_000153345_Bacteria	Proteobacteria_Gammaproteobacteria_Pseudomonadales_Nitrincolaceae_Neptuniibacter_Neptuniibacter-caesariensis
RS_GCF_001597725_Bacteria	Proteobacteria_Gammaproteobacteria_Pseudomonadales_Nitrincolaceae_Neptuniibacter_Neptuniibacter-marinus
RS_GCF_001597735_Bacteria	Proteobacteria_Gammaproteobacteria_Pseudomonadales_Nitrincolaceae_Neptuniibacter_Neptuniibacter-pectenicola
GB_GCA_002435145_Bacteria	Proteobacteria_Gammaproteobacteria_Pseudomonadales_Nitrincolaceae_Neptuniibacter_Neptuniibacter-sp002435145
RS_GCF_008630635_Bacteria	Proteobacteria_Gammaproteobacteria_Pseudomonadales_Nitrincolaceae_Neptunomonas_Neptunomonas-concharum
RS_GCF_000422765_Bacteria	Proteobacteria_Gammaproteobacteria_Pseudomonadales_Nitrincolaceae_Neptunomonas_Neptunomonas-japonica
RS_GCF_016592555_Bacteria	Proteobacteria_Gammaproteobacteria_Pseudomonadales_Nitrincolaceae_Neptunomonas_Neptunomonas-japonica_A
RS_GCF_004005935_Bacteria	Proteobacteria_Gammaproteobacteria_Pseudomonadales_Nitrincolaceae_Neptunomonas_Neptunomonas-marina
RS_GCF_900113275_Bacteria	Proteobacteria_Gammaproteobacteria_Pseudomonadales_Nitrincolaceae_Neptunomonas_Neptunomonas-qingdaonensis
GB_GCA_016744175_Bacteria	Proteobacteria_Gammaproteobacteria_Pseudomonadales_Nitrincolaceae_Neptunomonas_Neptunomonas-sp016744175
RS_GCF_015209595_Bacteria	Proteobacteria_Gammaproteobacteria_Pseudomonadales_Nitrincolaceae_Pontibacterium_Pontibacterium-sp015209595
GB_GCA_000416315_Bacteria	Proteobacteria_Gammaproteobacteria_Pseudomonadales_Nitrincolaceae_Rs1_Rs1-sp000416315
GB_GCA_013215505_Bacteria	Proteobacteria_Gammaproteobacteria_Pseudomonadales_Nitrincolaceae_Rs1_Rs1-sp013215505
RS_GCF_900142385_Bacteria	Proteobacteria_Gammaproteobacteria_Pseudomonadales_Oleiphilaceae_Marinobacter_Marinobacter-antarcticus
GB_GCA_011049865_Bacteria	Proteobacteria_Gammaproteobacteria_Pseudomonadales_Oleiphilaceae_Marinobacter_Marinobacter-antarcticus_A
RS_GCF_002744735_Bacteria	Proteobacteria_Gammaproteobacteria_Pseudomonadales_Oleiphilaceae_Marinobacter_Marinobacter-guineae
RS_GCF_004792665_Bacteria	Proteobacteria_Gammaproteobacteria_Pseudomonadales_Oleiphilaceae_Marinobacter_Marinobacter-orientalis
RS_GCF_900114925_Bacteria	Proteobacteria_Gammaproteobacteria_Pseudomonadales_Oleiphilaceae_Marinobacter_Marinobacter-pelagius
RS_GCF_003315345_Bacteria	Proteobacteria_Gammaproteobacteria_Pseudomonadales_Oleiphilaceae_Marinobacter_Marinobacter-pelagius_A
RS_GCF_001854125_Bacteria	Proteobacteria_Gammaproteobacteria_Pseudomonadales_Oleiphilaceae_Marinobacter_Marinobacter-salinus
RS_GCF_005298175_Bacteria	Proteobacteria_Gammaproteobacteria_Pseudomonadales_Oleiphilaceae_Marinobacter_Marinobacter-sp005298175
RS_GCF_008107725_Bacteria	Proteobacteria_Gammaproteobacteria_Pseudomonadales_Oleiphilaceae_Marinobacter_Marinobacter-sp008107725
GB_GCA_014762755_Bacteria	Proteobacteria_Gammaproteobacteria_Pseudomonadales_Oleiphilaceae_Marinobacter_Marinobacter-sp014762755
RS_GCF_017301335_Bacteria	Proteobacteria_Gammaproteobacteria_Pseudomonadales_Oleiphilaceae_Marinobacter_Marinobacter-sp017301335
RS_GCF_900188435_Bacteria	Proteobacteria_Gammaproteobacteria_Pseudomonadales_Oleiphilaceae_Marinobacter_Marinobacter-sp900188435
RS_GCF_001045555_Bacteria	Proteobacteria_Gammaproteobacteria_Pseudomonadales_Oleiphilaceae_Marinobacter_Marinobacter-subterrani
RS_GCF_003344045_Bacteria	Proteobacteria_Gammaproteobacteria_Pseudomonadales_Oleiphilaceae_Marinobacter_Marinobacter-vulgaris
GB_GCA_002162815_Bacteria	Proteobacteria_Gammaproteobacteria_Pseudomonadales_Porticoccaceae_50-400-T64_50-400-T64-sp002162815
GB_GCA_018069465_Bacteria	Proteobacteria_Gammaproteobacteria_Pseudomonadales_Porticoccaceae_50-400-T64_50-400-T64-sp018069465
GB_GCA_019090225_Bacteria	Proteobacteria_Gammaproteobacteria_Pseudomonadales_Porticoccaceae_HB2-32-21_HB2-32-21-sp019090225
GB_GCA_016191205_Bacteria	Proteobacteria_Gammaproteobacteria_Pseudomonadales_Porticoccaceae_JAGPUQ01_JAGPUQ01-sp016191205
GB_GCA_018069525_Bacteria	Proteobacteria_Gammaproteobacteria_Pseudomonadales_Porticoccaceae_JAGPUQ01_JAGPUQ01-sp018069525
GB_GCA_003645495_Bacteria	Proteobacteria_Gammaproteobacteria_Woeseiales_Woeseiaceae_SZUA-117_SZUA-117-sp003645495
GB_GCA_016744455_Bacteria	Proteobacteria_Gammaproteobacteria_Xanthomonadales_Marinicellaceae_NORP309_NORP309-sp016744455
GB_GCA_016721015_Bacteria	Proteobacteria_Gammaproteobacteria_Xanthomonadales_Rhodanobacteraceae_Dokdonella_Dokdonella-sp016721015
GB_GCA_004298015_Bacteria	Proteobacteria_Gammaproteobacteria_Xanthomonadales_Rhodanobacteraceae_Rhodanobacter_Rhodanobacter-sp004298015
GB_GCA_004298045_Bacteria	Proteobacteria_Gammaproteobacteria_Xanthomonadales_Rhodanobacteraceae_Rhodanobacter_Rhodanobacter-sp004298045
RS_GCF_000264375_Bacteria	Proteobacteria_Gammaproteobacteria_Xanthomonadales_Rhodanobacteraceae_Rhodanobacter_Rhodanobacter-thiooxydans
GB_GCA_018240545_Bacteria	Proteobacteria_Gammaproteobacteria_Xanthomonadales_Rhodanobacteraceae_Rudaea_Rudaea-sp018240545
GB_GCA_016713135_Bacteria	Proteobacteria_Gammaproteobacteria_Xanthomonadales_SZUA-5_JADKFD01_JADKFD01-sp016713135
GB_GCA_016717705_Bacteria	Proteobacteria_Gammaproteobacteria_Xanthomonadales_SZUA-5_JADKFD01_JADKFD01-sp016717705
GB_GCA_016718605_Bacteria	Proteobacteria_Gammaproteobacteria_Xanthomonadales_Xanthomonadaceae_Aquimonas_Aquimonas-sp002068275
RS_GCF_000747075_Bacteria	Proteobacteria_Gammaproteobacteria_Xanthomonadales_Xanthomonadaceae_Arenimonas_Arenimonas-malthae
GB_GCA_003497545_Bacteria	Proteobacteria_Gammaproteobacteria_Xanthomonadales_Xanthomonadaceae_Arenimonas_Arenimonas-sp003497545
GB_GCA_002683655_Bacteria	SAR324_SAR324_SAR324_NAC60-12_JCVI-SCAAA005_JCVI-SCAAA005-sp002683655
GB_GCA_000522425_Bacteria	Tectomicrobia_Entotheonellia_Entotheonellales_Entotheonellaceae_Entotheonella_Entotheonella-factor
RS_GCF_900079095_Bacteria	Tectomicrobia_Entotheonellia_Entotheonellales_Entotheonellaceae_Entotheonella_Entotheonella-palauensis
GB_GCA_008932935_Bacteria	Verrucomicrobiota_Verrucomicrobiae_Verrucomicrobiales_Akkermansiaceae_Luteolibacter_Luteolibacter-sp008932935

## Sheet: Complete Sox, plus SoxR
Species containing the complete Sox system plus SoxR
Accession_Prokaryotic domain	GTDB taxonomy_phylum_class_order_family_genus_species				RS: NCBI RefSeq database
GB_GCA_002255575_Bacteria	Proteobacteria_Alphaproteobacteria_Acetobacterales_Acetobacteraceae_Acidocella_Acidocella-sp002255575				GB: NCBI GeneBank database
GB_GCA_903881515_Bacteria	Proteobacteria_Alphaproteobacteria_Acetobacterales_Acetobacteraceae_CAIRTN01_CAIRTN01-sp903881515
RS_GCF_014199195_Bacteria	Proteobacteria_Alphaproteobacteria_Acetobacterales_Acetobacteraceae_Roseomonas_B_Roseomonas_B-alkaliterrae
RS_GCF_018129005_Bacteria	Proteobacteria_Alphaproteobacteria_Acetobacterales_Acetobacteraceae_Roseomonas_B_Roseomonas_B-eburnea
RS_GCF_003568845_Bacteria	Proteobacteria_Alphaproteobacteria_Azospirillales_Azospirillaceae_Indioceanicola_Indioceanicola-profundi
GB_GCA_016124535_Bacteria	Proteobacteria_Alphaproteobacteria_Azospirillales_Azospirillaceae_RI-112_RI-112-sp016124535
RS_GCF_016765655_Bacteria	Proteobacteria_Alphaproteobacteria_Azospirillales_Azospirillaceae_Skermanella_Skermanella-mucosa
RS_GCF_016806835_Bacteria	Proteobacteria_Alphaproteobacteria_Azospirillales_Azospirillaceae_Skermanella_Skermanella-rosea
GB_GCA_016792765_Bacteria	Proteobacteria_Alphaproteobacteria_Bin65_Bin65_SBBV01_SBBV01-sp016792765
GB_GCA_016794005_Bacteria	Proteobacteria_Alphaproteobacteria_CACIAM-22H2_CACIAM-22H2_Tagaea_Tagaea-sp016794005
GB_GCA_016869415_Bacteria	Proteobacteria_Alphaproteobacteria_CACIAM-22H2_CACIAM-22H2_VGEI01_VGEI01-sp016869415
GB_GCA_016792605_Bacteria	Proteobacteria_Alphaproteobacteria_JAEULC01_JAEULC01_JAEULC01_JAEULC01-sp016792605
RS_GCF_007004665_Bacteria	Proteobacteria_Alphaproteobacteria_Kiloniellales_Kiloniellaceae_Denitrobaculum_Denitrobaculum-tricleocarpae
RS_GCF_011683915_Bacteria	Proteobacteria_Alphaproteobacteria_Kiloniellales_Kiloniellaceae_Pelagibius_Pelagibius-litoralis
GB_GCA_001657395_Bacteria	Proteobacteria_Alphaproteobacteria_Kiloniellales_Kiloniellaceae_Pelagibius_Pelagibius-sp001657395
GB_GCA_009377535_Bacteria	Proteobacteria_Alphaproteobacteria_Kiloniellales_Kiloniellaceae_WHTV01_WHTV01-sp009377535
RS_GCF_014925385_Bacteria	Proteobacteria_Alphaproteobacteria_Kiloniellales_Kiloniellaceae_WHTV01_WHTV01-sp014925385
GB_GCA_016865035_Bacteria	Proteobacteria_Alphaproteobacteria_Minwuiales_Minwuiaceae_Minwuia_Minwuia-sp016865035
RS_GCF_002924445_Bacteria	Proteobacteria_Alphaproteobacteria_Minwuiales_Minwuiaceae_Minwuia_Minwuia-thermotolerans
GB_GCA_902520575_Bacteria	Proteobacteria_Alphaproteobacteria_Puniceispirillales_Puniceispirillaceae_HIMB100_HIMB100-sp902520575
GB_GCA_902547925_Bacteria	Proteobacteria_Alphaproteobacteria_Puniceispirillales_Puniceispirillaceae_MED-G116_MED-G116-sp902547925
GB_GCA_902578815_Bacteria	Proteobacteria_Alphaproteobacteria_Puniceispirillales_Puniceispirillaceae_MED-G116_MED-G116-sp902578815
GB_GCA_902596655_Bacteria	Proteobacteria_Alphaproteobacteria_Puniceispirillales_Puniceispirillaceae_MED-G116_MED-G116-sp902596655
GB_GCA_902623185_Bacteria	Proteobacteria_Alphaproteobacteria_Puniceispirillales_Puniceispirillaceae_MED-G116_MED-G116-sp902623185
GB_GCA_003212345_Bacteria	Proteobacteria_Alphaproteobacteria_Puniceispirillales_Puniceispirillaceae_UBA3439_UBA3439-sp003212345
GB_GCA_003282865_Bacteria	Proteobacteria_Alphaproteobacteria_Puniceispirillales_Puniceispirillaceae_UBA3439_UBA3439-sp003282865
GB_GCA_009919335_Bacteria	Proteobacteria_Alphaproteobacteria_Puniceispirillales_Puniceispirillaceae_UBA3439_UBA3439-sp009919335
GB_GCA_902559985_Bacteria	Proteobacteria_Alphaproteobacteria_Puniceispirillales_Puniceispirillaceae_UBA3439_UBA3439-sp902559985
GB_GCA_905182545_Bacteria	Proteobacteria_Alphaproteobacteria_Puniceispirillales_Puniceispirillaceae_UBA3439_UBA3439-sp905182545
GB_GCA_009920665_Bacteria	Proteobacteria_Alphaproteobacteria_Puniceispirillales_Puniceispirillaceae_UBA8309_UBA8309-sp009920665
GB_GCA_011522975_Bacteria	Proteobacteria_Alphaproteobacteria_Puniceispirillales_UBA1172_UBA1172_UBA1172-sp011522975
GB_GCA_016699855_Bacteria	Proteobacteria_Alphaproteobacteria_Reyranellales_Reyranellaceae_GCA-016699855_GCA-016699855-sp016699855
GB_GCA_016869975_Bacteria	Proteobacteria_Alphaproteobacteria_Reyranellales_Reyranellaceae_JAFAZJ01_JAFAZJ01-sp016869975
RS_GCF_008039615_Bacteria	Proteobacteria_Alphaproteobacteria_Reyranellales_Reyranellaceae_SYSU-D60007_SYSU-D60007-sp008039615
RS_GCF_014199265_Bacteria	Proteobacteria_Alphaproteobacteria_Rhizobiales_A_Rhizobiaceae_A_Ochrobactrum_C_Ochrobactrum_C-daejeonensis
GB_GCA_900149695_Bacteria	Proteobacteria_Alphaproteobacteria_Rhizobiales_Aestuariivirgaceae_Anderseniella_Anderseniella-sp900149695
GB_GCA_013002595_Bacteria	Proteobacteria_Alphaproteobacteria_Rhizobiales_Aestuariivirgaceae_JABDJG01_JABDJG01-sp013002595
RS_GCF_000688515_Bacteria	Proteobacteria_Alphaproteobacteria_Rhizobiales_Afifellaceae_Afifella_Afifella-pfennigii
RS_GCF_009866965_Bacteria	Proteobacteria_Alphaproteobacteria_Rhizobiales_Afifellaceae_Propylenella_Propylenella-binzhouense
RS_GCF_003258595_Bacteria	Proteobacteria_Alphaproteobacteria_Rhizobiales_Amorphaceae_Acuticoccus_Acuticoccus-sediminis
RS_GCF_001305515_Bacteria	Proteobacteria_Alphaproteobacteria_Rhizobiales_Ancalomicrobiaceae_Prosthecomicrobium_A_Prosthecomicrobium_A-hirschii
GB_GCA_018729455_Bacteria	Proteobacteria_Alphaproteobacteria_Rhizobiales_Ancalomicrobiaceae_Prosthecomicrobium_A_Prosthecomicrobium_A-sp018729455
GB_GCA_903847605_Bacteria	Proteobacteria_Alphaproteobacteria_Rhizobiales_Beijerinckiaceae_28-YEA-48_28-YEA-48-sp903847605
RS_GCF_900109525_Bacteria	Proteobacteria_Alphaproteobacteria_Rhizobiales_Beijerinckiaceae_Bosea_Bosea-lupini
RS_GCF_000735605_Bacteria	Proteobacteria_Alphaproteobacteria_Rhizobiales_Beijerinckiaceae_Bosea_Bosea-sp000735605
RS_GCF_001426225_Bacteria	Proteobacteria_Alphaproteobacteria_Rhizobiales_Beijerinckiaceae_Bosea_Bosea-sp001426225
RS_GCF_001429505_Bacteria	Proteobacteria_Alphaproteobacteria_Rhizobiales_Beijerinckiaceae_Bosea_Bosea-sp001429505
RS_GCF_001509835_Bacteria	Proteobacteria_Alphaproteobacteria_Rhizobiales_Beijerinckiaceae_Bosea_Bosea-sp001509835
GB_GCA_001556025_Bacteria	Proteobacteria_Alphaproteobacteria_Rhizobiales_Beijerinckiaceae_Bosea_Bosea-sp001556025
GB_GCA_001556125_Bacteria	Proteobacteria_Alphaproteobacteria_Rhizobiales_Beijerinckiaceae_Bosea_Bosea-sp001556125
RS_GCF_001713455_Bacteria	Proteobacteria_Alphaproteobacteria_Rhizobiales_Beijerinckiaceae_Bosea_Bosea-sp001713455
RS_GCF_001748145_Bacteria	Proteobacteria_Alphaproteobacteria_Rhizobiales_Beijerinckiaceae_Bosea_Bosea-sp001748145
GB_GCA_001898115_Bacteria	Proteobacteria_Alphaproteobacteria_Rhizobiales_Beijerinckiaceae_Bosea_Bosea-sp001898115
RS_GCF_002220095_Bacteria	Proteobacteria_Alphaproteobacteria_Rhizobiales_Beijerinckiaceae_Bosea_Bosea-sp002220095
RS_GCF_003046175_Bacteria	Proteobacteria_Alphaproteobacteria_Rhizobiales_Beijerinckiaceae_Bosea_Bosea-sp003046175
RS_GCF_003208615_Bacteria	Proteobacteria_Alphaproteobacteria_Rhizobiales_Beijerinckiaceae_Bosea_Bosea-sp003208615
RS_GCF_003952665_Bacteria	Proteobacteria_Alphaproteobacteria_Rhizobiales_Beijerinckiaceae_Bosea_Bosea-sp003952665
RS_GCF_004123845_Bacteria	Proteobacteria_Alphaproteobacteria_Rhizobiales_Beijerinckiaceae_Bosea_Bosea-sp004123845
GB_GCA_005502805_Bacteria	Proteobacteria_Alphaproteobacteria_Rhizobiales_Beijerinckiaceae_Bosea_Bosea-sp005502805
RS_GCF_011764485_Bacteria	Proteobacteria_Alphaproteobacteria_Rhizobiales_Beijerinckiaceae_Bosea_Bosea-sp011764485
GB_GCA_013823325_Bacteria	Proteobacteria_Alphaproteobacteria_Rhizobiales_Beijerinckiaceae_Bosea_Bosea-sp013823325
GB_GCA_017308015_Bacteria	Proteobacteria_Alphaproteobacteria_Rhizobiales_Beijerinckiaceae_Bosea_Bosea-sp017308015
GB_GCA_017308075_Bacteria	Proteobacteria_Alphaproteobacteria_Rhizobiales_Beijerinckiaceae_Bosea_Bosea-sp017308075
RS_GCF_900112185_Bacteria	Proteobacteria_Alphaproteobacteria_Rhizobiales_Beijerinckiaceae_Bosea_Bosea-sp900112185
RS_GCF_900185715_Bacteria	Proteobacteria_Alphaproteobacteria_Rhizobiales_Beijerinckiaceae_Bosea_Bosea-sp900185715
GB_GCA_900470095_Bacteria	Proteobacteria_Alphaproteobacteria_Rhizobiales_Beijerinckiaceae_Bosea_Bosea-sp900470095
RS_GCF_902506165_Bacteria	Proteobacteria_Alphaproteobacteria_Rhizobiales_Beijerinckiaceae_Bosea_Bosea-sp902506165
RS_GCF_900168195_Bacteria	Proteobacteria_Alphaproteobacteria_Rhizobiales_Beijerinckiaceae_Bosea_Bosea-thiooxidans
RS_GCF_001298265_Bacteria	Proteobacteria_Alphaproteobacteria_Rhizobiales_Beijerinckiaceae_Bosea_Bosea-vaviloviae_B
GB_GCA_900104855_Bacteria	Proteobacteria_Alphaproteobacteria_Rhizobiales_Beijerinckiaceae_GAS188_GAS188-sp900104855
GB_GCA_016716745_Bacteria	Proteobacteria_Alphaproteobacteria_Rhizobiales_Beijerinckiaceae_GCA-013693735_GCA-013693735-sp016716745
GB_GCA_016793505_Bacteria	Proteobacteria_Alphaproteobacteria_Rhizobiales_Beijerinckiaceae_GCA-013693735_GCA-013693735-sp016793505
RS_GCF_003697185_Bacteria	Proteobacteria_Alphaproteobacteria_Rhizobiales_Beijerinckiaceae_Methylobacterium_Methylobacterium-brachiatum
RS_GCF_900113485_Bacteria	Proteobacteria_Alphaproteobacteria_Rhizobiales_Beijerinckiaceae_Methylobacterium_Methylobacterium-gossipiicola
RS_GCF_000364445_Bacteria	Proteobacteria_Alphaproteobacteria_Rhizobiales_Beijerinckiaceae_Methylobacterium_Methylobacterium-mesophilicum
RS_GCF_900103445_Bacteria	Proteobacteria_Alphaproteobacteria_Rhizobiales_Beijerinckiaceae_Methylobacterium_Methylobacterium-phyllostachyos
RS_GCF_014199985_Bacteria	Proteobacteria_Alphaproteobacteria_Rhizobiales_Beijerinckiaceae_Methylobacterium_Methylobacterium-rhodesianum
RS_GCF_900114375_Bacteria	Proteobacteria_Alphaproteobacteria_Rhizobiales_Beijerinckiaceae_Methylobacterium_Methylobacterium-salsuginis
RS_GCF_000019365_Bacteria	Proteobacteria_Alphaproteobacteria_Rhizobiales_Beijerinckiaceae_Methylobacterium_Methylobacterium-sp000019365
RS_GCF_001423405_Bacteria	Proteobacteria_Alphaproteobacteria_Rhizobiales_Beijerinckiaceae_Methylobacterium_Methylobacterium-sp001423405
GB_GCA_002778835_Bacteria	Proteobacteria_Alphaproteobacteria_Rhizobiales_Beijerinckiaceae_Methylobacterium_Methylobacterium-sp002778835
RS_GCF_003111705_Bacteria	Proteobacteria_Alphaproteobacteria_Rhizobiales_Beijerinckiaceae_Methylobacterium_Methylobacterium-sp003111705
RS_GCF_005502455_Bacteria	Proteobacteria_Alphaproteobacteria_Rhizobiales_Beijerinckiaceae_Methylobacterium_Methylobacterium-sp005502455
RS_GCF_009806555_Bacteria	Proteobacteria_Alphaproteobacteria_Rhizobiales_Beijerinckiaceae_Methylobacterium_Methylobacterium-sp009806555
RS_GCF_902141845_Bacteria	Proteobacteria_Alphaproteobacteria_Rhizobiales_Beijerinckiaceae_Methylobacterium_Methylobacterium-symbioticum
GB_GCA_014138645_Bacteria	Proteobacteria_Alphaproteobacteria_Rhizobiales_Beijerinckiaceae_Methylobacterium_Methylobacterium-thiocyanatum
RS_GCF_014845115_Bacteria	Proteobacteria_Alphaproteobacteria_Rhizobiales_Beijerinckiaceae_Methylobacterium_Methylobacterium-zatmanii
RS_GCF_008641065_Bacteria	Proteobacteria_Alphaproteobacteria_Rhizobiales_Beijerinckiaceae_Rhabdaerophilum_Rhabdaerophilum-calidifontis
GB_GCA_002256205_Bacteria	Proteobacteria_Alphaproteobacteria_Rhizobiales_Beijerinckiaceae_Rhabdaerophilum_Rhabdaerophilum-sp002256205
GB_GCA_002928875_Bacteria	Proteobacteria_Alphaproteobacteria_Rhizobiales_Beijerinckiaceae_Rhabdaerophilum_Rhabdaerophilum-sp002928875
GB_GCA_009773635_Bacteria	Proteobacteria_Alphaproteobacteria_Rhizobiales_Beijerinckiaceae_Rhabdaerophilum_Rhabdaerophilum-sp009773635
GB_GCA_017302635_Bacteria	Proteobacteria_Alphaproteobacteria_Rhizobiales_Beijerinckiaceae_Rhabdaerophilum_Rhabdaerophilum-sp017302635
GB_GCA_903903185_Bacteria	Proteobacteria_Alphaproteobacteria_Rhizobiales_Beijerinckiaceae_Rhodoblastus_Rhodoblastus-sp903903185
RS_GCF_002866925_Bacteria	Proteobacteria_Alphaproteobacteria_Rhizobiales_Cohaesibacteraceae_Cohaesibacter_Cohaesibacter-celericrescens
RS_GCF_900215605_Bacteria	Proteobacteria_Alphaproteobacteria_Rhizobiales_Cohaesibacteraceae_Cohaesibacter_Cohaesibacter-gelatinilyticus
RS_GCF_003324485_Bacteria	Proteobacteria_Alphaproteobacteria_Rhizobiales_Cohaesibacteraceae_Cohaesibacter_Cohaesibacter-intestini
GB_GCA_017640685_Bacteria	Proteobacteria_Alphaproteobacteria_Rhizobiales_HXMU1428-3_HXMU1428-3_HXMU1428-3-sp017640685
GB_GCA_011046675_Bacteria	Proteobacteria_Alphaproteobacteria_Rhizobiales_Hyphomicrobiaceae_AWTP1-13_AWTP1-13-sp011046675
RS_GCF_900104305_Bacteria	Proteobacteria_Alphaproteobacteria_Rhizobiales_Hyphomicrobiaceae_Filomicrobium_Filomicrobium-insigne
GB_GCA_001516065_Bacteria	Proteobacteria_Alphaproteobacteria_Rhizobiales_Hyphomicrobiaceae_Filomicrobium_Filomicrobium-sp001516065
GB_GCA_017792465_Bacteria	Proteobacteria_Alphaproteobacteria_Rhizobiales_Hyphomicrobiaceae_Filomicrobium_Filomicrobium-sp017792465
GB_GCA_018819265_Bacteria	Proteobacteria_Alphaproteobacteria_Rhizobiales_Hyphomicrobiaceae_Filomicrobium_Filomicrobium-sp018819265
GB_GCA_001464755_Bacteria	Proteobacteria_Alphaproteobacteria_Rhizobiales_Hyphomicrobiaceae_Ga0077555_Ga0077555-sp001464755
GB_GCA_001464955_Bacteria	Proteobacteria_Alphaproteobacteria_Rhizobiales_Hyphomicrobiaceae_Ga0077555_Ga0077555-sp001464955
RS_GCF_013626205_Bacteria	Proteobacteria_Alphaproteobacteria_Rhizobiales_Hyphomicrobiaceae_Hyphomicrobium_Hyphomicrobium-methylovorum
GB_GCA_002928955_Bacteria	Proteobacteria_Alphaproteobacteria_Rhizobiales_Hyphomicrobiaceae_Hyphomicrobium_Hyphomicrobium-sp002928955
GB_GCA_016125495_Bacteria	Proteobacteria_Alphaproteobacteria_Rhizobiales_Hyphomicrobiaceae_RI-29_RI-29-sp016125495
GB_GCA_905479595_Bacteria	Proteobacteria_Alphaproteobacteria_Rhizobiales_Im1_CAJQND01_CAJQND01-sp905479595
GB_GCA_002352635_Bacteria	Proteobacteria_Alphaproteobacteria_Rhizobiales_Methyloligellaceae_UBA2767_UBA2767-sp002352635
GB_GCA_003241695_Bacteria	Proteobacteria_Alphaproteobacteria_Rhizobiales_Methylopilaceae_Hansschlegelia_Hansschlegelia-sp003241695
RS_GCF_004103825_Bacteria	Proteobacteria_Alphaproteobacteria_Rhizobiales_Methylopilaceae_Hansschlegelia_Hansschlegelia-zhihuaiae
RS_GCF_016907975_Bacteria	Proteobacteria_Alphaproteobacteria_Rhizobiales_Methylopilaceae_Methylopila_Methylopila-capsulata
RS_GCF_003008515_Bacteria	Proteobacteria_Alphaproteobacteria_Rhizobiales_Phreatobacteraceae_Phreatobacter_Phreatobacter-cathodiphilus
GB_GCA_000751295_Bacteria	Proteobacteria_Alphaproteobacteria_Rhizobiales_Phreatobacteraceae_Phreatobacter_Phreatobacter-sp000751295
GB_GCA_016793595_Bacteria	Proteobacteria_Alphaproteobacteria_Rhizobiales_Phreatobacteraceae_Phreatobacter_Phreatobacter-sp016793595
GB_GCA_017304475_Bacteria	Proteobacteria_Alphaproteobacteria_Rhizobiales_Phreatobacteraceae_Phreatobacter_Phreatobacter-sp017304475
RS_GCF_005144885_Bacteria	Proteobacteria_Alphaproteobacteria_Rhizobiales_Phreatobacteraceae_Phreatobacter_Phreatobacter-stygius
RS_GCF_900231165_Bacteria	Proteobacteria_Alphaproteobacteria_Rhizobiales_Pleomorphomonadaceae_Hartmannibacter_Hartmannibacter-diazotrophicus
RS_GCF_000497755_Bacteria	Proteobacteria_Alphaproteobacteria_Rhizobiales_Rhizobiaceae_Aliihoeflea_Aliihoeflea-sp000497755
RS_GCF_003337715_Bacteria	Proteobacteria_Alphaproteobacteria_Rhizobiales_Rhizobiaceae_Allorhizobium_Allorhizobium-lividum
RS_GCF_007992095_Bacteria	Proteobacteria_Alphaproteobacteria_Rhizobiales_Rhizobiaceae_Allorhizobium_Allorhizobium-naphthalenivorans
RS_GCF_900492205_Bacteria	Proteobacteria_Alphaproteobacteria_Rhizobiales_Rhizobiaceae_Allorhizobium_Allorhizobium-naphthalenivorans_A
RS_GCF_001713475_Bacteria	Proteobacteria_Alphaproteobacteria_Rhizobiales_Rhizobiaceae_Allorhizobium_Allorhizobium-sp001713475
GB_GCA_002307905_Bacteria	Proteobacteria_Alphaproteobacteria_Rhizobiales_Rhizobiaceae_Allorhizobium_Allorhizobium-sp002307905
GB_GCA_003527225_Bacteria	Proteobacteria_Alphaproteobacteria_Rhizobiales_Rhizobiaceae_Allorhizobium_Allorhizobium-sp003527225
GB_GCA_900465605_Bacteria	Proteobacteria_Alphaproteobacteria_Rhizobiales_Rhizobiaceae_Allorhizobium_Allorhizobium-sp900465605
GB_GCA_900466005_Bacteria	Proteobacteria_Alphaproteobacteria_Rhizobiales_Rhizobiaceae_Allorhizobium_Allorhizobium-sp900466005
RS_GCF_010500835_Bacteria	Proteobacteria_Alphaproteobacteria_Rhizobiales_Rhizobiaceae_Aurantimonas_Aurantimonas-aggregata
RS_GCF_000421645_Bacteria	Proteobacteria_Alphaproteobacteria_Rhizobiales_Rhizobiaceae_Aurantimonas_Aurantimonas-coralicida
RS_GCF_014196845_Bacteria	Proteobacteria_Alphaproteobacteria_Rhizobiales_Rhizobiaceae_Aurantimonas_Aurantimonas-endophytica
RS_GCF_000153465_Bacteria	Proteobacteria_Alphaproteobacteria_Rhizobiales_Rhizobiaceae_Aurantimonas_Aurantimonas-manganoxydans
RS_GCF_017183135_Bacteria	Proteobacteria_Alphaproteobacteria_Rhizobiales_Rhizobiaceae_Aurantimonas_Aurantimonas-sp017183135
RS_GCF_000153705_Bacteria	Proteobacteria_Alphaproteobacteria_Rhizobiales_Rhizobiaceae_Fulvimarina_Fulvimarina-pelagi
GB_GCA_016763155_Bacteria	Proteobacteria_Alphaproteobacteria_Rhizobiales_Rhizobiaceae_GCA-2401155_GCA-2401155-sp016763155
RS_GCF_003182275_Bacteria	Proteobacteria_Alphaproteobacteria_Rhizobiales_Rhizobiaceae_Hoeflea_Hoeflea-marina
RS_GCF_000154705_Bacteria	Proteobacteria_Alphaproteobacteria_Rhizobiales_Rhizobiaceae_Hoeflea_Hoeflea-phototrophica
GB_GCA_000961635_Bacteria	Proteobacteria_Alphaproteobacteria_Rhizobiales_Rhizobiaceae_Hoeflea_Hoeflea-sp000961635
RS_GCF_001011155_Bacteria	Proteobacteria_Alphaproteobacteria_Rhizobiales_Rhizobiaceae_Hoeflea_Hoeflea-sp001011155
GB_GCA_002733955_Bacteria	Proteobacteria_Alphaproteobacteria_Rhizobiales_Rhizobiaceae_Hoeflea_Hoeflea-sp002733955
GB_GCA_014359905_Bacteria	Proteobacteria_Alphaproteobacteria_Rhizobiales_Rhizobiaceae_Hoeflea_Hoeflea-sp014359905
GB_GCA_019084245_Bacteria	Proteobacteria_Alphaproteobacteria_Rhizobiales_Rhizobiaceae_Hoeflea_Hoeflea-sp019084245
RS_GCF_902498795_Bacteria	Proteobacteria_Alphaproteobacteria_Rhizobiales_Rhizobiaceae_Hoeflea_Hoeflea-sp902498795
RS_GCF_009749525_Bacteria	Proteobacteria_Alphaproteobacteria_Rhizobiales_Rhizobiaceae_Im94_Im94-sp009749525
RS_GCF_010500815_Bacteria	Proteobacteria_Alphaproteobacteria_Rhizobiales_Rhizobiaceae_Jiella_Jiella-pacifica
GB_GCA_017644105_Bacteria	Proteobacteria_Alphaproteobacteria_Rhizobiales_Rhizobiaceae_Lentilitoribacter_Lentilitoribacter-sp017644105
RS_GCF_900537175_Bacteria	Proteobacteria_Alphaproteobacteria_Rhizobiales_Rhizobiaceae_Lentilitoribacter_Lentilitoribacter-sp900537175
RS_GCF_003970795_Bacteria	Proteobacteria_Alphaproteobacteria_Rhizobiales_Rhizobiaceae_Mesorhizobium_E_Mesorhizobium_E-carbonis
RS_GCF_001889605_Bacteria	Proteobacteria_Alphaproteobacteria_Rhizobiales_Rhizobiaceae_Mesorhizobium_E_Mesorhizobium_E-oceanicum
RS_GCF_014495845_Bacteria	Proteobacteria_Alphaproteobacteria_Rhizobiales_Rhizobiaceae_Mesorhizobium_E_Mesorhizobium_E-sp014495845
RS_GCF_014201615_Bacteria	Proteobacteria_Alphaproteobacteria_Rhizobiales_Rhizobiaceae_Mesorhizobium_Mesorhizobium-lusatiense
RS_GCF_002075885_Bacteria	Proteobacteria_Alphaproteobacteria_Rhizobiales_Rhizobiaceae_Mesorhizobium_Mesorhizobium-manganicum
RS_GCF_001303895_Bacteria	Proteobacteria_Alphaproteobacteria_Rhizobiales_Rhizobiaceae_Mesorhizobium_Mesorhizobium-sp001303895
RS_GCF_007830515_Bacteria	Proteobacteria_Alphaproteobacteria_Rhizobiales_Rhizobiaceae_Mesorhizobium_Mesorhizobium-tianshanense
RS_GCF_017873175_Bacteria	Proteobacteria_Alphaproteobacteria_Rhizobiales_Rhizobiaceae_Neorhizobium_Neorhizobium-petrolearium
RS_GCF_009742725_Bacteria	Proteobacteria_Alphaproteobacteria_Rhizobiales_Rhizobiaceae_Nitratireductor_D_Nitratireductor_D-arenosus
RS_GCF_003015025_Bacteria	Proteobacteria_Alphaproteobacteria_Rhizobiales_Rhizobiaceae_Nitratireductor_D_Nitratireductor_D-sp003015025
RS_GCF_007922615_Bacteria	Proteobacteria_Alphaproteobacteria_Rhizobiales_Rhizobiaceae_Nitratireductor_D_Nitratireductor_D-sp007922615
RS_GCF_000300335_Bacteria	Proteobacteria_Alphaproteobacteria_Rhizobiales_Rhizobiaceae_Nitratireductor_Nitratireductor-pacificus
RS_GCF_001050155_Bacteria	Proteobacteria_Alphaproteobacteria_Rhizobiales_Rhizobiaceae_Nitratireductor_Nitratireductor-soli
RS_GCF_002238045_Bacteria	Proteobacteria_Alphaproteobacteria_Rhizobiales_Rhizobiaceae_Notoacmeibacter_Notoacmeibacter-marinus
RS_GCF_004331745_Bacteria	Proteobacteria_Alphaproteobacteria_Rhizobiales_Rhizobiaceae_Oricola_Oricola-cellulosilytica
GB_GCA_002698425_Bacteria	Proteobacteria_Alphaproteobacteria_Rhizobiales_Rhizobiaceae_Oricola_Oricola-sp002698425
GB_GCA_002706335_Bacteria	Proteobacteria_Alphaproteobacteria_Rhizobiales_Rhizobiaceae_Oricola_Oricola-sp002706335
RS_GCF_014904745_Bacteria	Proteobacteria_Alphaproteobacteria_Rhizobiales_Rhizobiaceae_Oricola_Oricola-sp014904745
RS_GCF_013358405_Bacteria	Proteobacteria_Alphaproteobacteria_Rhizobiales_Rhizobiaceae_Oricola_Oricola-thermophila
RS_GCF_003148475_Bacteria	Proteobacteria_Alphaproteobacteria_Rhizobiales_Rhizobiaceae_Pseudaminobacter_Pseudaminobacter-salicylatoxidans
RS_GCF_017874015_Bacteria	Proteobacteria_Alphaproteobacteria_Rhizobiales_Rhizobiaceae_Pseudaminobacter_Pseudaminobacter-sp017874015
GB_GCA_002707605_Bacteria	Proteobacteria_Alphaproteobacteria_Rhizobiales_Rhizobiaceae_Pseudohoeflea_Pseudohoeflea-sp002707605
GB_GCA_002709005_Bacteria	Proteobacteria_Alphaproteobacteria_Rhizobiales_Rhizobiaceae_Pseudohoeflea_Pseudohoeflea-sp002709005
RS_GCF_004354915_Bacteria	Proteobacteria_Alphaproteobacteria_Rhizobiales_Rhizobiaceae_Pseudohoeflea_Pseudohoeflea-suaedae
RS_GCF_902502825_Bacteria	Proteobacteria_Alphaproteobacteria_Rhizobiales_Rhizobiaceae_Pseudorhizobium_Pseudorhizobium-flavum
GB_GCA_018823835_Bacteria	Proteobacteria_Alphaproteobacteria_Rhizobiales_Rhizobiaceae_RCIZ01_RCIZ01-sp018823835
RS_GCF_001953055_Bacteria	Proteobacteria_Alphaproteobacteria_Rhizobiales_Rhizobiaceae_Salaquimonas_Salaquimonas-pukyongi
GB_GCA_017854535_Bacteria	Proteobacteria_Alphaproteobacteria_Rhizobiales_Rhizobiaceae_Salaquimonas_Salaquimonas-sp017854535
RS_GCF_002727065_Bacteria	Proteobacteria_Alphaproteobacteria_Rhizobiales_Rhizobiaceae_Zhengella_Zhengella-mangrovi
GB_GCA_002708825_Bacteria	Proteobacteria_Alphaproteobacteria_Rhizobiales_Rhizobiaceae_Zhengella_Zhengella-sp002708825
RS_GCF_003550175_Bacteria	Proteobacteria_Alphaproteobacteria_Rhizobiales_Rhodomicrobiaceae_Dichotomicrobium_Dichotomicrobium-thermohalophilum
RS_GCF_003053845_Bacteria	Proteobacteria_Alphaproteobacteria_Rhizobiales_Stappiaceae_Breoghania_Breoghania-corrubedonensis
RS_GCF_003432385_Bacteria	Proteobacteria_Alphaproteobacteria_Rhizobiales_Stappiaceae_Breoghania_Breoghania-sp003432385
RS_GCF_009826895_Bacteria	Proteobacteria_Alphaproteobacteria_Rhizobiales_Stappiaceae_Hongsoonwoonella_Hongsoonwoonella-sp009826895
RS_GCF_013266695_Bacteria	Proteobacteria_Alphaproteobacteria_Rhizobiales_Stappiaceae_Hongsoonwoonella_Hongsoonwoonella-zoysiae
RS_GCF_000192745_Bacteria	Proteobacteria_Alphaproteobacteria_Rhizobiales_Stappiaceae_Polymorphum_Polymorphum-gilvum
RS_GCF_900114245_Bacteria	Proteobacteria_Alphaproteobacteria_Rhizobiales_Stappiaceae_Pseudovibrio_Pseudovibrio-ascidiaceicola
RS_GCF_018282095_Bacteria	Proteobacteria_Alphaproteobacteria_Rhizobiales_Stappiaceae_Pseudovibrio_Pseudovibrio-brasiliensis
RS_GCF_014651595_Bacteria	Proteobacteria_Alphaproteobacteria_Rhizobiales_Stappiaceae_Pseudovibrio_Pseudovibrio-japonicus
RS_GCF_001623075_Bacteria	Proteobacteria_Alphaproteobacteria_Rhizobiales_Stappiaceae_Pseudovibrio_Pseudovibrio-sp001623075
RS_GCF_900104145_Bacteria	Proteobacteria_Alphaproteobacteria_Rhizobiales_Stappiaceae_Pseudovibrio_Pseudovibrio-sp900104145
RS_GCF_900143565_Bacteria	Proteobacteria_Alphaproteobacteria_Rhizobiales_Stappiaceae_Pseudovibrio_Pseudovibrio-sp900143565
RS_GCF_008477545_Bacteria	Proteobacteria_Alphaproteobacteria_Rhizobiales_Stappiaceae_Roseibium_Roseibium-aestuarii
RS_GCF_000168975_Bacteria	Proteobacteria_Alphaproteobacteria_Rhizobiales_Stappiaceae_Roseibium_Roseibium-aggregatum
RS_GCF_001999245_Bacteria	Proteobacteria_Alphaproteobacteria_Rhizobiales_Stappiaceae_Roseibium_Roseibium-aggregatum_A
RS_GCF_017309185_Bacteria	Proteobacteria_Alphaproteobacteria_Rhizobiales_Stappiaceae_Roseibium_Roseibium-aggregatum_B
RS_GCF_014692675_Bacteria	Proteobacteria_Alphaproteobacteria_Rhizobiales_Stappiaceae_Roseibium_Roseibium-aggregatum_C
RS_GCF_001404515_Bacteria	Proteobacteria_Alphaproteobacteria_Rhizobiales_Stappiaceae_Roseibium_Roseibium-album
RS_GCF_001404055_Bacteria	Proteobacteria_Alphaproteobacteria_Rhizobiales_Stappiaceae_Roseibium_Roseibium-album_A
RS_GCF_000158095_Bacteria	Proteobacteria_Alphaproteobacteria_Rhizobiales_Stappiaceae_Roseibium_Roseibium-alexandrii
RS_GCF_008711285_Bacteria	Proteobacteria_Alphaproteobacteria_Rhizobiales_Stappiaceae_Roseibium_Roseibium-aquae
RS_GCF_009711415_Bacteria	Proteobacteria_Alphaproteobacteria_Rhizobiales_Stappiaceae_Roseibium_Roseibium-denhamense
RS_GCF_007830545_Bacteria	Proteobacteria_Alphaproteobacteria_Rhizobiales_Stappiaceae_Roseibium_Roseibium-hamelinense
RS_GCF_014842915_Bacteria	Proteobacteria_Alphaproteobacteria_Rhizobiales_Stappiaceae_Roseibium_Roseibium-litorale
RS_GCF_002906165_Bacteria	Proteobacteria_Alphaproteobacteria_Rhizobiales_Stappiaceae_Roseibium_Roseibium-marinum
RS_GCF_014842925_Bacteria	Proteobacteria_Alphaproteobacteria_Rhizobiales_Stappiaceae_Roseibium_Roseibium-polysiphoniae
RS_GCF_008711325_Bacteria	Proteobacteria_Alphaproteobacteria_Rhizobiales_Stappiaceae_Roseibium_Roseibium-sediminis
RS_GCF_000148725_Bacteria	Proteobacteria_Alphaproteobacteria_Rhizobiales_Stappiaceae_Roseibium_Roseibium-sp000148725
RS_GCF_000521215_Bacteria	Proteobacteria_Alphaproteobacteria_Rhizobiales_Stappiaceae_Roseibium_Roseibium-sp000521215
RS_GCF_001624695_Bacteria	Proteobacteria_Alphaproteobacteria_Rhizobiales_Stappiaceae_Roseibium_Roseibium-sp001624695
GB_GCA_001890945_Bacteria	Proteobacteria_Alphaproteobacteria_Rhizobiales_Stappiaceae_Roseibium_Roseibium-sp001890945
RS_GCF_002237595_Bacteria	Proteobacteria_Alphaproteobacteria_Rhizobiales_Stappiaceae_Roseibium_Roseibium-sp002237595
RS_GCF_003075075_Bacteria	Proteobacteria_Alphaproteobacteria_Rhizobiales_Stappiaceae_Roseibium_Roseibium-sp003075075
RS_GCF_006517275_Bacteria	Proteobacteria_Alphaproteobacteria_Rhizobiales_Stappiaceae_Roseibium_Roseibium-sp006517275
RS_GCF_008107695_Bacteria	Proteobacteria_Alphaproteobacteria_Rhizobiales_Stappiaceae_Roseibium_Roseibium-sp008107695
GB_GCA_008107755_Bacteria	Proteobacteria_Alphaproteobacteria_Rhizobiales_Stappiaceae_Roseibium_Roseibium-sp008107755
RS_GCF_009363435_Bacteria	Proteobacteria_Alphaproteobacteria_Rhizobiales_Stappiaceae_Roseibium_Roseibium-sp009363435
RS_GCF_009650605_Bacteria	Proteobacteria_Alphaproteobacteria_Rhizobiales_Stappiaceae_Roseibium_Roseibium-sp009650605
GB_GCA_017643215_Bacteria	Proteobacteria_Alphaproteobacteria_Rhizobiales_Stappiaceae_Roseibium_Roseibium-sp017643215
GB_GCA_017643925_Bacteria	Proteobacteria_Alphaproteobacteria_Rhizobiales_Stappiaceae_Roseibium_Roseibium-sp017643925
RS_GCF_900142725_Bacteria	Proteobacteria_Alphaproteobacteria_Rhizobiales_Stappiaceae_Roseibium_Roseibium-suaedae
RS_GCF_001696535_Bacteria	Proteobacteria_Alphaproteobacteria_Rhizobiales_Stappiaceae_Stappia_Stappia-indica
RS_GCF_009789575_Bacteria	Proteobacteria_Alphaproteobacteria_Rhizobiales_Stappiaceae_Stappia_Stappia-indica_A
GB_GCA_002709505_Bacteria	Proteobacteria_Alphaproteobacteria_Rhizobiales_Stappiaceae_Stappia_Stappia-sp002709505
GB_GCA_002722295_Bacteria	Proteobacteria_Alphaproteobacteria_Rhizobiales_Stappiaceae_Stappia_Stappia-sp002722295
RS_GCF_003610575_Bacteria	Proteobacteria_Alphaproteobacteria_Rhizobiales_Stappiaceae_Stappia_Stappia-sp003610575
RS_GCF_900105595_Bacteria	Proteobacteria_Alphaproteobacteria_Rhizobiales_Stappiaceae_Stappia_Stappia-sp900105595
RS_GCF_900185725_Bacteria	Proteobacteria_Alphaproteobacteria_Rhizobiales_Stappiaceae_Stappia_Stappia-sp900185725
RS_GCF_000423705_Bacteria	Proteobacteria_Alphaproteobacteria_Rhizobiales_Stappiaceae_Stappia_Stappia-stellulata
RS_GCF_014635285_Bacteria	Proteobacteria_Alphaproteobacteria_Rhizobiales_Stappiaceae_Stappia_Stappia-taiwanensis
RS_GCF_000496075_Bacteria	Proteobacteria_Alphaproteobacteria_Rhizobiales_Tepidamorphaceae_Lutibaculum_Lutibaculum-baratangense
GB_GCA_905479765_Bacteria	Proteobacteria_Alphaproteobacteria_Rhizobiales_Tepidamorphaceae_Tepidamorphus_Tepidamorphus-sp905479765
RS_GCF_000746275_Bacteria	Proteobacteria_Alphaproteobacteria_Rhizobiales_Thermopetrobacteraceae_Thermopetrobacter_Thermopetrobacter-sp000746275
GB_GCA_001899255_Bacteria	Proteobacteria_Alphaproteobacteria_Rhizobiales_Xanthobacteraceae_62-47_62-47-sp001899255
GB_GCA_017305535_Bacteria	Proteobacteria_Alphaproteobacteria_Rhizobiales_Xanthobacteraceae_62-47_62-47-sp017305535
GB_GCA_017305555_Bacteria	Proteobacteria_Alphaproteobacteria_Rhizobiales_Xanthobacteraceae_62-47_62-47-sp017305555
RS_GCF_000314675_Bacteria	Proteobacteria_Alphaproteobacteria_Rhizobiales_Xanthobacteraceae_Afipia_Afipia-broomeae
RS_GCF_000218565_Bacteria	Proteobacteria_Alphaproteobacteria_Rhizobiales_Xanthobacteraceae_Afipia_Afipia-carboxidovorans
RS_GCF_000336555_Bacteria	Proteobacteria_Alphaproteobacteria_Rhizobiales_Xanthobacteraceae_Afipia_Afipia-clevelandensis
RS_GCF_000314735_Bacteria	Proteobacteria_Alphaproteobacteria_Rhizobiales_Xanthobacteraceae_Afipia_Afipia-felis
RS_GCF_014203115_Bacteria	Proteobacteria_Alphaproteobacteria_Rhizobiales_Xanthobacteraceae_Afipia_Afipia-massiliensis
RS_GCF_001006325_Bacteria	Proteobacteria_Alphaproteobacteria_Rhizobiales_Xanthobacteraceae_Afipia_Afipia-massiliensis_A
RS_GCF_000178995_Bacteria	Proteobacteria_Alphaproteobacteria_Rhizobiales_Xanthobacteraceae_Afipia_Afipia-sp000178995
RS_GCF_000497575_Bacteria	Proteobacteria_Alphaproteobacteria_Rhizobiales_Xanthobacteraceae_Afipia_Afipia-sp000497575
RS_GCF_001425835_Bacteria	Proteobacteria_Alphaproteobacteria_Rhizobiales_Xanthobacteraceae_Afipia_Afipia-sp001425835
GB_GCA_001897755_Bacteria	Proteobacteria_Alphaproteobacteria_Rhizobiales_Xanthobacteraceae_Afipia_Afipia-sp001897755
GB_GCA_003963145_Bacteria	Proteobacteria_Alphaproteobacteria_Rhizobiales_Xanthobacteraceae_Afipia_Afipia-sp003963145
GB_GCA_017305455_Bacteria	Proteobacteria_Alphaproteobacteria_Rhizobiales_Xanthobacteraceae_Afipia_Afipia-sp017305455
GB_GCA_017474385_Bacteria	Proteobacteria_Alphaproteobacteria_Rhizobiales_Xanthobacteraceae_Afipia_Afipia-sp017474385
RS_GCF_018390645_Bacteria	Proteobacteria_Alphaproteobacteria_Rhizobiales_Xanthobacteraceae_Ancylobacter_Ancylobacter-dichloromethanicus
RS_GCF_900100155_Bacteria	Proteobacteria_Alphaproteobacteria_Rhizobiales_Xanthobacteraceae_Ancylobacter_Ancylobacter-rudongensis
RS_GCF_009223885_Bacteria	Proteobacteria_Alphaproteobacteria_Rhizobiales_Xanthobacteraceae_Ancylobacter_Ancylobacter-sp009223885
RS_GCF_018449475_Bacteria	Proteobacteria_Alphaproteobacteria_Rhizobiales_Xanthobacteraceae_Angulomicrobium_Angulomicrobium-sp018449475
RS_GCF_008630065_Bacteria	Proteobacteria_Alphaproteobacteria_Rhizobiales_Xanthobacteraceae_Blastochloris_Blastochloris-sulfoviridis
RS_GCF_003966715_Bacteria	Proteobacteria_Alphaproteobacteria_Rhizobiales_Xanthobacteraceae_Blastochloris_Blastochloris-tepida
RS_GCF_003062295_Bacteria	Proteobacteria_Alphaproteobacteria_Rhizobiales_Xanthobacteraceae_Bradyrhizobium_Bradyrhizobium-algeriense
RS_GCF_002266435_Bacteria	Proteobacteria_Alphaproteobacteria_Rhizobiales_Xanthobacteraceae_Bradyrhizobium_Bradyrhizobium-amphicarpaeae
RS_GCF_013114835_Bacteria	Proteobacteria_Alphaproteobacteria_Rhizobiales_Xanthobacteraceae_Bradyrhizobium_Bradyrhizobium-archetypum
RS_GCF_013114825_Bacteria	Proteobacteria_Alphaproteobacteria_Rhizobiales_Xanthobacteraceae_Bradyrhizobium_Bradyrhizobium-australiense
RS_GCF_000015165_Bacteria	Proteobacteria_Alphaproteobacteria_Rhizobiales_Xanthobacteraceae_Bradyrhizobium_Bradyrhizobium-denitrificans
RS_GCF_000011365_Bacteria	Proteobacteria_Alphaproteobacteria_Rhizobiales_Xanthobacteraceae_Bradyrhizobium_Bradyrhizobium-diazoefficiens
RS_GCF_900129505_Bacteria	Proteobacteria_Alphaproteobacteria_Rhizobiales_Xanthobacteraceae_Bradyrhizobium_Bradyrhizobium-erythrophlei_D
RS_GCF_004114975_Bacteria	Proteobacteria_Alphaproteobacteria_Rhizobiales_Xanthobacteraceae_Bradyrhizobium_Bradyrhizobium-guangdongense
RS_GCF_006483445_Bacteria	Proteobacteria_Alphaproteobacteria_Rhizobiales_Xanthobacteraceae_Bradyrhizobium_Bradyrhizobium-guangdongense_A
RS_GCF_004114915_Bacteria	Proteobacteria_Alphaproteobacteria_Rhizobiales_Xanthobacteraceae_Bradyrhizobium_Bradyrhizobium-guangxiense
RS_GCF_004114955_Bacteria	Proteobacteria_Alphaproteobacteria_Rhizobiales_Xanthobacteraceae_Bradyrhizobium_Bradyrhizobium-guangzhouense
RS_GCF_001693385_Bacteria	Proteobacteria_Alphaproteobacteria_Rhizobiales_Xanthobacteraceae_Bradyrhizobium_Bradyrhizobium-icense
RS_GCF_018130765_Bacteria	Proteobacteria_Alphaproteobacteria_Rhizobiales_Xanthobacteraceae_Bradyrhizobium_Bradyrhizobium-iriomotense_A
RS_GCF_018129405_Bacteria	Proteobacteria_Alphaproteobacteria_Rhizobiales_Xanthobacteraceae_Bradyrhizobium_Bradyrhizobium-iriomotense_B
RS_GCF_000482425_Bacteria	Proteobacteria_Alphaproteobacteria_Rhizobiales_Xanthobacteraceae_Bradyrhizobium_Bradyrhizobium-japonicum_B
RS_GCF_000426845_Bacteria	Proteobacteria_Alphaproteobacteria_Rhizobiales_Xanthobacteraceae_Bradyrhizobium_Bradyrhizobium-japonicum_C
RS_GCF_018130245_Bacteria	Proteobacteria_Alphaproteobacteria_Rhizobiales_Xanthobacteraceae_Bradyrhizobium_Bradyrhizobium-japonicum_F
RS_GCF_018129995_Bacteria	Proteobacteria_Alphaproteobacteria_Rhizobiales_Xanthobacteraceae_Bradyrhizobium_Bradyrhizobium-japonicum_G
RS_GCF_018129985_Bacteria	Proteobacteria_Alphaproteobacteria_Rhizobiales_Xanthobacteraceae_Bradyrhizobium_Bradyrhizobium-japonicum_H
RS_GCF_001440395_Bacteria	Proteobacteria_Alphaproteobacteria_Rhizobiales_Xanthobacteraceae_Bradyrhizobium_Bradyrhizobium-jicamae
RS_GCF_001440475_Bacteria	Proteobacteria_Alphaproteobacteria_Rhizobiales_Xanthobacteraceae_Bradyrhizobium_Bradyrhizobium-lablabi
RS_GCF_002797515_Bacteria	Proteobacteria_Alphaproteobacteria_Rhizobiales_Xanthobacteraceae_Bradyrhizobium_Bradyrhizobium-lablabi_B
RS_GCF_018130955_Bacteria	Proteobacteria_Alphaproteobacteria_Rhizobiales_Xanthobacteraceae_Bradyrhizobium_Bradyrhizobium-liaoningense_C
RS_GCF_004114535_Bacteria	Proteobacteria_Alphaproteobacteria_Rhizobiales_Xanthobacteraceae_Bradyrhizobium_Bradyrhizobium-nanningense
RS_GCF_001641695_Bacteria	Proteobacteria_Alphaproteobacteria_Rhizobiales_Xanthobacteraceae_Bradyrhizobium_Bradyrhizobium-neotropicale
RS_GCF_000344805_Bacteria	Proteobacteria_Alphaproteobacteria_Rhizobiales_Xanthobacteraceae_Bradyrhizobium_Bradyrhizobium-oligotrophicum
RS_GCF_002278135_Bacteria	Proteobacteria_Alphaproteobacteria_Rhizobiales_Xanthobacteraceae_Bradyrhizobium_Bradyrhizobium-ottawaense
RS_GCF_900099825_Bacteria	Proteobacteria_Alphaproteobacteria_Rhizobiales_Xanthobacteraceae_Bradyrhizobium_Bradyrhizobium-ottawaense_A
RS_GCF_001693515_Bacteria	Proteobacteria_Alphaproteobacteria_Rhizobiales_Xanthobacteraceae_Bradyrhizobium_Bradyrhizobium-paxllaeri
RS_GCF_013373795_Bacteria	Proteobacteria_Alphaproteobacteria_Rhizobiales_Xanthobacteraceae_Bradyrhizobium_Bradyrhizobium-quebecense
RS_GCF_001440415_Bacteria	Proteobacteria_Alphaproteobacteria_Rhizobiales_Xanthobacteraceae_Bradyrhizobium_Bradyrhizobium-retamae
RS_GCF_000026145_Bacteria	Proteobacteria_Alphaproteobacteria_Rhizobiales_Xanthobacteraceae_Bradyrhizobium_Bradyrhizobium-sp000026145
RS_GCF_000239775_Bacteria	Proteobacteria_Alphaproteobacteria_Rhizobiales_Xanthobacteraceae_Bradyrhizobium_Bradyrhizobium-sp000239775
RS_GCF_000239795_Bacteria	Proteobacteria_Alphaproteobacteria_Rhizobiales_Xanthobacteraceae_Bradyrhizobium_Bradyrhizobium-sp000239795
RS_GCF_000239815_Bacteria	Proteobacteria_Alphaproteobacteria_Rhizobiales_Xanthobacteraceae_Bradyrhizobium_Bradyrhizobium-sp000239815
RS_GCF_000244935_Bacteria	Proteobacteria_Alphaproteobacteria_Rhizobiales_Xanthobacteraceae_Bradyrhizobium_Bradyrhizobium-sp000244935
RS_GCF_000261685_Bacteria	Proteobacteria_Alphaproteobacteria_Rhizobiales_Xanthobacteraceae_Bradyrhizobium_Bradyrhizobium-sp000261685
GB_GCA_001464035_Bacteria	Proteobacteria_Alphaproteobacteria_Rhizobiales_Xanthobacteraceae_Bradyrhizobium_Bradyrhizobium-sp001464035
RS_GCF_001556045_Bacteria	Proteobacteria_Alphaproteobacteria_Rhizobiales_Xanthobacteraceae_Bradyrhizobium_Bradyrhizobium-sp001556045
RS_GCF_001590795_Bacteria	Proteobacteria_Alphaproteobacteria_Rhizobiales_Xanthobacteraceae_Bradyrhizobium_Bradyrhizobium-sp001590795
RS_GCF_001693485_Bacteria	Proteobacteria_Alphaproteobacteria_Rhizobiales_Xanthobacteraceae_Bradyrhizobium_Bradyrhizobium-sp001693485
RS_GCF_001908185_Bacteria	Proteobacteria_Alphaproteobacteria_Rhizobiales_Xanthobacteraceae_Bradyrhizobium_Bradyrhizobium-sp001908185
RS_GCF_001908205_Bacteria	Proteobacteria_Alphaproteobacteria_Rhizobiales_Xanthobacteraceae_Bradyrhizobium_Bradyrhizobium-sp001908205
RS_GCF_002531575_Bacteria	Proteobacteria_Alphaproteobacteria_Rhizobiales_Xanthobacteraceae_Bradyrhizobium_Bradyrhizobium-sp002531575
RS_GCF_003020125_Bacteria	Proteobacteria_Alphaproteobacteria_Rhizobiales_Xanthobacteraceae_Bradyrhizobium_Bradyrhizobium-sp003020125
GB_GCA_004799405_Bacteria	Proteobacteria_Alphaproteobacteria_Rhizobiales_Xanthobacteraceae_Bradyrhizobium_Bradyrhizobium-sp004799405
RS_GCF_005937885_Bacteria	Proteobacteria_Alphaproteobacteria_Rhizobiales_Xanthobacteraceae_Bradyrhizobium_Bradyrhizobium-sp005937885
RS_GCF_009930815_Bacteria	Proteobacteria_Alphaproteobacteria_Rhizobiales_Xanthobacteraceae_Bradyrhizobium_Bradyrhizobium-sp009930815
RS_GCF_013178945_Bacteria	Proteobacteria_Alphaproteobacteria_Rhizobiales_Xanthobacteraceae_Bradyrhizobium_Bradyrhizobium-sp013178945
RS_GCF_015291645_Bacteria	Proteobacteria_Alphaproteobacteria_Rhizobiales_Xanthobacteraceae_Bradyrhizobium_Bradyrhizobium-sp015291645
RS_GCF_015291665_Bacteria	Proteobacteria_Alphaproteobacteria_Rhizobiales_Xanthobacteraceae_Bradyrhizobium_Bradyrhizobium-sp015291665
RS_GCF_015291745_Bacteria	Proteobacteria_Alphaproteobacteria_Rhizobiales_Xanthobacteraceae_Bradyrhizobium_Bradyrhizobium-sp015291745
GB_GCA_016213215_Bacteria	Proteobacteria_Alphaproteobacteria_Rhizobiales_Xanthobacteraceae_Bradyrhizobium_Bradyrhizobium-sp016213215
GB_GCA_016219575_Bacteria	Proteobacteria_Alphaproteobacteria_Rhizobiales_Xanthobacteraceae_Bradyrhizobium_Bradyrhizobium-sp016219575
GB_GCA_017305715_Bacteria	Proteobacteria_Alphaproteobacteria_Rhizobiales_Xanthobacteraceae_Bradyrhizobium_Bradyrhizobium-sp017305715
RS_GCF_017872735_Bacteria	Proteobacteria_Alphaproteobacteria_Rhizobiales_Xanthobacteraceae_Bradyrhizobium_Bradyrhizobium-sp017872735
GB_GCA_017881085_Bacteria	Proteobacteria_Alphaproteobacteria_Rhizobiales_Xanthobacteraceae_Bradyrhizobium_Bradyrhizobium-sp017881085
RS_GCF_018130065_Bacteria	Proteobacteria_Alphaproteobacteria_Rhizobiales_Xanthobacteraceae_Bradyrhizobium_Bradyrhizobium-sp018130065
RS_GCF_018130145_Bacteria	Proteobacteria_Alphaproteobacteria_Rhizobiales_Xanthobacteraceae_Bradyrhizobium_Bradyrhizobium-sp018130145
RS_GCF_018130165_Bacteria	Proteobacteria_Alphaproteobacteria_Rhizobiales_Xanthobacteraceae_Bradyrhizobium_Bradyrhizobium-sp018130165
RS_GCF_018130385_Bacteria	Proteobacteria_Alphaproteobacteria_Rhizobiales_Xanthobacteraceae_Bradyrhizobium_Bradyrhizobium-sp018130385
RS_GCF_018131075_Bacteria	Proteobacteria_Alphaproteobacteria_Rhizobiales_Xanthobacteraceae_Bradyrhizobium_Bradyrhizobium-sp018131075
RS_GCF_018398875_Bacteria	Proteobacteria_Alphaproteobacteria_Rhizobiales_Xanthobacteraceae_Bradyrhizobium_Bradyrhizobium-sp018398875
RS_GCF_018398895_Bacteria	Proteobacteria_Alphaproteobacteria_Rhizobiales_Xanthobacteraceae_Bradyrhizobium_Bradyrhizobium-sp018398895
RS_GCF_018596315_Bacteria	Proteobacteria_Alphaproteobacteria_Rhizobiales_Xanthobacteraceae_Bradyrhizobium_Bradyrhizobium-sp018596315
RS_GCF_018736105_Bacteria	Proteobacteria_Alphaproteobacteria_Rhizobiales_Xanthobacteraceae_Bradyrhizobium_Bradyrhizobium-sp018736105
RS_GCF_900103365_Bacteria	Proteobacteria_Alphaproteobacteria_Rhizobiales_Xanthobacteraceae_Bradyrhizobium_Bradyrhizobium-sp900103365
RS_GCF_900114915_Bacteria	Proteobacteria_Alphaproteobacteria_Rhizobiales_Xanthobacteraceae_Bradyrhizobium_Bradyrhizobium-sp900114915
RS_GCF_900115265_Bacteria	Proteobacteria_Alphaproteobacteria_Rhizobiales_Xanthobacteraceae_Bradyrhizobium_Bradyrhizobium-sp900115265
RS_GCF_900176205_Bacteria	Proteobacteria_Alphaproteobacteria_Rhizobiales_Xanthobacteraceae_Bradyrhizobium_Bradyrhizobium-sp900176205
RS_GCF_001641335_Bacteria	Proteobacteria_Alphaproteobacteria_Rhizobiales_Xanthobacteraceae_Bradyrhizobium_Bradyrhizobium-stylosanthis
RS_GCF_002266465_Bacteria	Proteobacteria_Alphaproteobacteria_Rhizobiales_Xanthobacteraceae_Bradyrhizobium_Bradyrhizobium-symbiodeficiens
RS_GCF_001440405_Bacteria	Proteobacteria_Alphaproteobacteria_Rhizobiales_Xanthobacteraceae_Bradyrhizobium_Bradyrhizobium-valentinum
GB_GCA_001238275_Bacteria	Proteobacteria_Alphaproteobacteria_Rhizobiales_Xanthobacteraceae_Bradyrhizobium_Bradyrhizobium-viridifuturi
GB_GCA_018335895_Bacteria	Proteobacteria_Alphaproteobacteria_Rhizobiales_Xanthobacteraceae_Ga0077548_Ga0077548-sp018335895
RS_GCF_000702305_Bacteria	Proteobacteria_Alphaproteobacteria_Rhizobiales_Xanthobacteraceae_GCF-000702305_GCF-000702305-sp000702305
GB_GCA_002304505_Bacteria	Proteobacteria_Alphaproteobacteria_Rhizobiales_Xanthobacteraceae_NCEH01_NCEH01-sp002304505
GB_GCA_017305665_Bacteria	Proteobacteria_Alphaproteobacteria_Rhizobiales_Xanthobacteraceae_Nitrobacter_Nitrobacter-sp017305665
GB_GCA_018240625_Bacteria	Proteobacteria_Alphaproteobacteria_Rhizobiales_Xanthobacteraceae_Nitrobacter_Nitrobacter-sp018240625
RS_GCF_000516555_Bacteria	Proteobacteria_Alphaproteobacteria_Rhizobiales_Xanthobacteraceae_P52-10_P52-10-sp000516555
GB_GCA_014873415_Bacteria	Proteobacteria_Alphaproteobacteria_Rhizobiales_Xanthobacteraceae_P52-10_P52-10-sp014873415
GB_GCA_001899285_Bacteria	Proteobacteria_Alphaproteobacteria_Rhizobiales_Xanthobacteraceae_Pseudolabrys_Pseudolabrys-sp001899285
GB_GCA_009694265_Bacteria	Proteobacteria_Alphaproteobacteria_Rhizobiales_Xanthobacteraceae_Pseudolabrys_Pseudolabrys-sp009694265
GB_GCA_019246455_Bacteria	Proteobacteria_Alphaproteobacteria_Rhizobiales_Xanthobacteraceae_Pseudolabrys_Pseudolabrys-sp019246455
GB_GCA_903892675_Bacteria	Proteobacteria_Alphaproteobacteria_Rhizobiales_Xanthobacteraceae_Pseudolabrys_Pseudolabrys-sp903892675
RS_GCF_002119765_Bacteria	Proteobacteria_Alphaproteobacteria_Rhizobiales_Xanthobacteraceae_Pseudorhodoplanes_Pseudorhodoplanes-sinuspersici
GB_GCA_008933495_Bacteria	Proteobacteria_Alphaproteobacteria_Rhizobiales_Xanthobacteraceae_Pseudorhodoplanes_Pseudorhodoplanes-sp008933495
GB_GCA_019187085_Bacteria	Proteobacteria_Alphaproteobacteria_Rhizobiales_Xanthobacteraceae_Pseudorhodoplanes_Pseudorhodoplanes-sp019187085
RS_GCF_003217325_Bacteria	Proteobacteria_Alphaproteobacteria_Rhizobiales_Xanthobacteraceae_Rhodopseudomonas_Rhodopseudomonas-faecalis
RS_GCF_000014825_Bacteria	Proteobacteria_Alphaproteobacteria_Rhizobiales_Xanthobacteraceae_Rhodopseudomonas_Rhodopseudomonas-palustris_B
RS_GCF_000504425_Bacteria	Proteobacteria_Alphaproteobacteria_Rhizobiales_Xanthobacteraceae_Rhodopseudomonas_Rhodopseudomonas-palustris_C
RS_GCF_013415845_Bacteria	Proteobacteria_Alphaproteobacteria_Rhizobiales_Xanthobacteraceae_Rhodopseudomonas_Rhodopseudomonas-palustris_F
RS_GCF_000177255_Bacteria	Proteobacteria_Alphaproteobacteria_Rhizobiales_Xanthobacteraceae_Rhodopseudomonas_Rhodopseudomonas-palustris_G
RS_GCF_003031265_Bacteria	Proteobacteria_Alphaproteobacteria_Rhizobiales_Xanthobacteraceae_Rhodopseudomonas_Rhodopseudomonas-palustris_H
RS_GCF_003226555_Bacteria	Proteobacteria_Alphaproteobacteria_Rhizobiales_Xanthobacteraceae_Rhodopseudomonas_Rhodopseudomonas-palustris_I
RS_GCF_000013365_Bacteria	Proteobacteria_Alphaproteobacteria_Rhizobiales_Xanthobacteraceae_Rhodopseudomonas_Rhodopseudomonas-palustris_J
GB_GCA_016215605_Bacteria	Proteobacteria_Alphaproteobacteria_Rhizobiales_Xanthobacteraceae_Rhodopseudomonas_Rhodopseudomonas-palustris_L
RS_GCF_900218015_Bacteria	Proteobacteria_Alphaproteobacteria_Rhizobiales_Xanthobacteraceae_Rhodopseudomonas_Rhodopseudomonas-pentothenatexigens
RS_GCF_900110435_Bacteria	Proteobacteria_Alphaproteobacteria_Rhizobiales_Xanthobacteraceae_Rhodopseudomonas_Rhodopseudomonas-pseudopalustris
RS_GCF_010907035_Bacteria	Proteobacteria_Alphaproteobacteria_Rhizobiales_Xanthobacteraceae_Rhodopseudomonas_Rhodopseudomonas-sp010907035
GB_GCA_013377015_Bacteria	Proteobacteria_Alphaproteobacteria_Rhizobiales_Xanthobacteraceae_Rhodopseudomonas_Rhodopseudomonas-sp013377015
GB_GCA_002083525_Bacteria	Proteobacteria_Alphaproteobacteria_Rhizobiales_Xanthobacteraceae_SG-bin9_SG-bin9-sp002083525
RS_GCF_000092925_Bacteria	Proteobacteria_Alphaproteobacteria_Rhizobiales_Xanthobacteraceae_Starkeya_Starkeya-novella
RS_GCF_013359755_Bacteria	Proteobacteria_Alphaproteobacteria_Rhizobiales_Xanthobacteraceae_Tardiphaga_Tardiphaga-robiniae
RS_GCF_001618955_Bacteria	Proteobacteria_Alphaproteobacteria_Rhizobiales_Xanthobacteraceae_Tardiphaga_Tardiphaga-robiniae_A
GB_GCA_002256345_Bacteria	Proteobacteria_Alphaproteobacteria_Rhizobiales_Xanthobacteraceae_Tardiphaga_Tardiphaga-sp002256345
RS_GCF_003096755_Bacteria	Proteobacteria_Alphaproteobacteria_Rhizobiales_Xanthobacteraceae_Tardiphaga_Tardiphaga-sp003096755
RS_GCF_007018905_Bacteria	Proteobacteria_Alphaproteobacteria_Rhizobiales_Xanthobacteraceae_Tardiphaga_Tardiphaga-sp007018905
RS_GCF_008329525_Bacteria	Proteobacteria_Alphaproteobacteria_Rhizobiales_Xanthobacteraceae_Tardiphaga_Tardiphaga-sp008329525
GB_GCA_014377915_Bacteria	Proteobacteria_Alphaproteobacteria_Rhizobiales_Xanthobacteraceae_Tardiphaga_Tardiphaga-sp014377915
RS_GCF_018279705_Bacteria	Proteobacteria_Alphaproteobacteria_Rhizobiales_Xanthobacteraceae_Tardiphaga_Tardiphaga-sp018279705
RS_GCF_900114605_Bacteria	Proteobacteria_Alphaproteobacteria_Rhizobiales_Xanthobacteraceae_Tardiphaga_Tardiphaga-sp900114605
RS_GCF_018131225_Bacteria	Proteobacteria_Alphaproteobacteria_Rhizobiales_Xanthobacteraceae_U87765_U87765-sp018131225
RS_GCF_002355335_Bacteria	Proteobacteria_Alphaproteobacteria_Rhizobiales_Xanthobacteraceae_Variibacter_Variibacter-gotjawalensis
GB_GCA_000017645_Bacteria	Proteobacteria_Alphaproteobacteria_Rhizobiales_Xanthobacteraceae_Xanthobacter_Xanthobacter-autotrophicus
RS_GCF_005871085_Bacteria	Proteobacteria_Alphaproteobacteria_Rhizobiales_Xanthobacteraceae_Xanthobacter_Xanthobacter-autotrophicus_A
GB_GCA_017849325_Bacteria	Proteobacteria_Alphaproteobacteria_Rhizobiales_Xanthobacteraceae_Xanthobacter_Xanthobacter-autotrophicus_B
RS_GCF_017875275_Bacteria	Proteobacteria_Alphaproteobacteria_Rhizobiales_Xanthobacteraceae_Xanthobacter_Xanthobacter-flavus
RS_GCF_000702385_Bacteria	Proteobacteria_Alphaproteobacteria_Rhizobiales_Xanthobacteraceae_Xanthobacter_Xanthobacter-sp000702385
RS_GCF_008364685_Bacteria	Proteobacteria_Alphaproteobacteria_Rhizobiales_Xanthobacteraceae_Xanthobacter_Xanthobacter-sp008364685
RS_GCF_012275355_Bacteria	Proteobacteria_Alphaproteobacteria_Rhizobiales_Xanthobacteraceae_Xanthobacter_Xanthobacter-sp012275355
RS_GCF_012932745_Bacteria	Proteobacteria_Alphaproteobacteria_Rhizobiales_Xanthobacteraceae_Xanthobacter_Xanthobacter-sp012932745
RS_GCF_016807805_Bacteria	Proteobacteria_Alphaproteobacteria_Rhizobiales_Xanthobacteraceae_Xanthobacter_Xanthobacter-sp016807805
GB_GCA_016869215_Bacteria	Proteobacteria_Alphaproteobacteria_Rhizobiales_Xanthobacteraceae_Z2-YC6860_Z2-YC6860-sp016869215
RS_GCF_900106675_Bacteria	Proteobacteria_Alphaproteobacteria_Rhodobacterales_Rhodobacteraceae_Acidimangrovimonas_Acidimangrovimonas-indica
RS_GCF_900184935_Bacteria	Proteobacteria_Alphaproteobacteria_Rhodobacterales_Rhodobacteraceae_Actibacterium_A_Actibacterium_A-lipolyticum
RS_GCF_014196965_Bacteria	Proteobacteria_Alphaproteobacteria_Rhodobacterales_Rhodobacteraceae_Actibacterium_A_Actibacterium_A-naphthalenivorans
RS_GCF_000671395_Bacteria	Proteobacteria_Alphaproteobacteria_Rhodobacterales_Rhodobacteraceae_Actibacterium_Actibacterium-atlanticum
RS_GCF_000647975_Bacteria	Proteobacteria_Alphaproteobacteria_Rhodobacterales_Rhodobacteraceae_Actibacterium_Actibacterium-mucosum
RS_GCF_002285415_Bacteria	Proteobacteria_Alphaproteobacteria_Rhodobacterales_Rhodobacteraceae_Actibacterium_Actibacterium-pelagium
RS_GCF_000744955_Bacteria	Proteobacteria_Alphaproteobacteria_Rhodobacterales_Rhodobacteraceae_Actibacterium_Actibacterium-sp000744955
RS_GCF_002285435_Bacteria	Proteobacteria_Alphaproteobacteria_Rhodobacterales_Rhodobacteraceae_Actibacterium_Actibacterium-ureilyticum
RS_GCF_018224955_Bacteria	Proteobacteria_Alphaproteobacteria_Rhodobacterales_Rhodobacteraceae_Aestuariicoccus_Aestuariicoccus-sp018224955
RS_GCF_001262635_Bacteria	Proteobacteria_Alphaproteobacteria_Rhodobacterales_Rhodobacteraceae_Aestuariivita_Aestuariivita-boseongensis
GB_GCA_018401465_Bacteria	Proteobacteria_Alphaproteobacteria_Rhodobacterales_Rhodobacteraceae_Aestuariivita_Aestuariivita-sp018401465
RS_GCF_900302475_Bacteria	Proteobacteria_Alphaproteobacteria_Rhodobacterales_Rhodobacteraceae_Albidovulum_Albidovulum-aquaemixtae
RS_GCF_002973535_Bacteria	Proteobacteria_Alphaproteobacteria_Rhodobacterales_Rhodobacteraceae_Albidovulum_Albidovulum-denitrificans
RS_GCF_002927635_Bacteria	Proteobacteria_Alphaproteobacteria_Rhodobacterales_Rhodobacteraceae_Albidovulum_Albidovulum-inexpectatum
GB_GCA_002280515_Bacteria	Proteobacteria_Alphaproteobacteria_Rhodobacterales_Rhodobacteraceae_Albidovulum_Albidovulum-sp002280515
GB_GCA_011620265_Bacteria	Proteobacteria_Alphaproteobacteria_Rhodobacterales_Rhodobacteraceae_Albidovulum_Albidovulum-sp011620265
RS_GCF_900113695_Bacteria	Proteobacteria_Alphaproteobacteria_Rhodobacterales_Rhodobacteraceae_Albimonas_Albimonas-pacifica
RS_GCF_007004645_Bacteria	Proteobacteria_Alphaproteobacteria_Rhodobacterales_Rhodobacteraceae_Aliiroseovarius_Aliiroseovarius-halocynthiae
RS_GCF_018599245_Bacteria	Proteobacteria_Alphaproteobacteria_Rhodobacterales_Rhodobacteraceae_Aliiroseovarius_Aliiroseovarius-lamellibrachiae
RS_GCF_004360145_Bacteria	Proteobacteria_Alphaproteobacteria_Rhodobacterales_Rhodobacteraceae_Aliiroseovarius_Aliiroseovarius-marinus
RS_GCF_900302485_Bacteria	Proteobacteria_Alphaproteobacteria_Rhodobacterales_Rhodobacteraceae_Aliiroseovarius_Aliiroseovarius-pelagivivens
RS_GCF_900109955_Bacteria	Proteobacteria_Alphaproteobacteria_Rhodobacterales_Rhodobacteraceae_Aliiroseovarius_Aliiroseovarius-sediminilitoris
GB_GCA_002340515_Bacteria	Proteobacteria_Alphaproteobacteria_Rhodobacterales_Rhodobacteraceae_Aliiroseovarius_Aliiroseovarius-sp002340515
RS_GCF_010500215_Bacteria	Proteobacteria_Alphaproteobacteria_Rhodobacterales_Rhodobacteraceae_Aliiroseovarius_Aliiroseovarius-sp010500215
RS_GCF_014656375_Bacteria	Proteobacteria_Alphaproteobacteria_Rhodobacterales_Rhodobacteraceae_Aliiroseovarius_Aliiroseovarius-zhejiangensis
RS_GCF_004803475_Bacteria	Proteobacteria_Alphaproteobacteria_Rhodobacterales_Rhodobacteraceae_Aliishimia_Aliishimia-ponticola
RS_GCF_003054175_Bacteria	Proteobacteria_Alphaproteobacteria_Rhodobacterales_Rhodobacteraceae_Allosediminivita_Allosediminivita-pacifica
RS_GCF_014201905_Bacteria	Proteobacteria_Alphaproteobacteria_Rhodobacterales_Rhodobacteraceae_Amaricoccus_Amaricoccus-macauensis
RS_GCF_014643735_Bacteria	Proteobacteria_Alphaproteobacteria_Rhodobacterales_Rhodobacteraceae_Amylibacter_Amylibacter-cionae
GB_GCA_016764475_Bacteria	Proteobacteria_Alphaproteobacteria_Rhodobacterales_Rhodobacteraceae_Amylibacter_Amylibacter-sp016764475
GB_GCA_019090795_Bacteria	Proteobacteria_Alphaproteobacteria_Rhodobacterales_Rhodobacteraceae_Amylibacter_Amylibacter-sp019090795
GB_GCA_900197625_Bacteria	Proteobacteria_Alphaproteobacteria_Rhodobacterales_Rhodobacteraceae_Amylibacter_Amylibacter-sp900197625
GB_GCA_905181935_Bacteria	Proteobacteria_Alphaproteobacteria_Rhodobacterales_Rhodobacteraceae_Amylibacter_Amylibacter-sp905181935
GB_GCA_905182285_Bacteria	Proteobacteria_Alphaproteobacteria_Rhodobacterales_Rhodobacteraceae_Amylibacter_Amylibacter-sp905182285
RS_GCF_004358185_Bacteria	Proteobacteria_Alphaproteobacteria_Rhodobacterales_Rhodobacteraceae_Antarcticimicrobium_Antarcticimicrobium-luteum
RS_GCF_004348975_Bacteria	Proteobacteria_Alphaproteobacteria_Rhodobacterales_Rhodobacteraceae_Antarcticimicrobium_Antarcticimicrobium-sediminis
RS_GCF_900188425_Bacteria	Proteobacteria_Alphaproteobacteria_Rhodobacterales_Rhodobacteraceae_Antarctobacter_Antarctobacter-heliothermus
RS_GCF_002237555_Bacteria	Proteobacteria_Alphaproteobacteria_Rhodobacterales_Rhodobacteraceae_Antarctobacter_Antarctobacter-heliothermus_B
RS_GCF_008369105_Bacteria	Proteobacteria_Alphaproteobacteria_Rhodobacterales_Rhodobacteraceae_Aquicoccus_Aquicoccus-porphyridii
GB_GCA_001314705_Bacteria	Proteobacteria_Alphaproteobacteria_Rhodobacterales_Rhodobacteraceae_Aquicoccus_Aquicoccus-sp001314705
RS_GCF_900302465_Bacteria	Proteobacteria_Alphaproteobacteria_Rhodobacterales_Rhodobacteraceae_Ascidiaceihabitans_Ascidiaceihabitans-donghaensis
GB_GCA_002478745_Bacteria	Proteobacteria_Alphaproteobacteria_Rhodobacterales_Rhodobacteraceae_Ascidiaceihabitans_Ascidiaceihabitans-sp002478745
GB_GCA_019061145_Bacteria	Proteobacteria_Alphaproteobacteria_Rhodobacterales_Rhodobacteraceae_ASV31_ASV31-sp019061145
GB_GCA_016806125_Bacteria	Proteobacteria_Alphaproteobacteria_Rhodobacterales_Rhodobacteraceae_AWRV01_AWRV01-sp000504185
RS_GCF_017255395_Bacteria	Proteobacteria_Alphaproteobacteria_Rhodobacterales_Rhodobacteraceae_AWRV01_AWRV01-sp017255395
RS_GCF_900156695_Bacteria	Proteobacteria_Alphaproteobacteria_Rhodobacterales_Rhodobacteraceae_Bieblia_A_Bieblia_A-vinaykumarii
RS_GCF_900184815_Bacteria	Proteobacteria_Alphaproteobacteria_Rhodobacterales_Rhodobacteraceae_Boseongicola_Boseongicola-aestuarii
GB_GCA_013042105_Bacteria	Proteobacteria_Alphaproteobacteria_Rhodobacterales_Rhodobacteraceae_Boseongicola_Boseongicola-sp013042105
RS_GCF_002797755_Bacteria	Proteobacteria_Alphaproteobacteria_Rhodobacterales_Rhodobacteraceae_Brevirhabdus_Brevirhabdus-pacifica
RS_GCF_002210165_Bacteria	Proteobacteria_Alphaproteobacteria_Rhodobacterales_Rhodobacteraceae_CAU-1492_CAU-1492-sp002210165
GB_GCA_016758075_Bacteria	Proteobacteria_Alphaproteobacteria_Rhodobacterales_Rhodobacteraceae_CAU-1492_CAU-1492-sp016758075
RS_GCF_019104745_Bacteria	Proteobacteria_Alphaproteobacteria_Rhodobacterales_Rhodobacteraceae_CAU-1522_CAU-1522-sp019104745
GB_GCA_004005435_Bacteria	Proteobacteria_Alphaproteobacteria_Rhodobacterales_Rhodobacteraceae_CCMM004_CCMM004-sp004005435
RS_GCF_001308265_Bacteria	Proteobacteria_Alphaproteobacteria_Rhodobacterales_Rhodobacteraceae_Celeribacter_A_Celeribacter_A-marinus
RS_GCF_900102315_Bacteria	Proteobacteria_Alphaproteobacteria_Rhodobacterales_Rhodobacteraceae_Celeribacter_Celeribacter-baekdonensis
RS_GCF_000299875_Bacteria	Proteobacteria_Alphaproteobacteria_Rhodobacterales_Rhodobacteraceae_Celeribacter_Celeribacter-baekdonensis_A
RS_GCF_003047105_Bacteria	Proteobacteria_Alphaproteobacteria_Rhodobacterales_Rhodobacteraceae_Celeribacter_Celeribacter-baekdonensis_B
RS_GCF_001550095_Bacteria	Proteobacteria_Alphaproteobacteria_Rhodobacterales_Rhodobacteraceae_Celeribacter_Celeribacter-ethanolicus
RS_GCF_900113955_Bacteria	Proteobacteria_Alphaproteobacteria_Rhodobacterales_Rhodobacteraceae_Celeribacter_Celeribacter-neptunius
RS_GCF_003050785_Bacteria	Proteobacteria_Alphaproteobacteria_Rhodobacterales_Rhodobacteraceae_Celeribacter_Celeribacter-persicus
RS_GCF_011806455_Bacteria	Proteobacteria_Alphaproteobacteria_Rhodobacterales_Rhodobacteraceae_Celeribacter_Celeribacter-sp011806455
RS_GCF_900207575_Bacteria	Proteobacteria_Alphaproteobacteria_Rhodobacterales_Rhodobacteraceae_Cereibacter_A_Cereibacter_A-ovatus
RS_GCF_002407205_Bacteria	Proteobacteria_Alphaproteobacteria_Rhodobacterales_Rhodobacteraceae_Cereibacter_A_Cereibacter_A-sp002407205
RS_GCF_003034985_Bacteria	Proteobacteria_Alphaproteobacteria_Rhodobacterales_Rhodobacteraceae_Cereibacter_Cereibacter-changlensis
RS_GCF_009765275_Bacteria	Proteobacteria_Alphaproteobacteria_Rhodobacterales_Rhodobacteraceae_Chachezhania_Chachezhania-sp009765275
RS_GCF_900107235_Bacteria	Proteobacteria_Alphaproteobacteria_Rhodobacterales_Rhodobacteraceae_Citreimonas_Citreimonas-salinaria
RS_GCF_001458335_Bacteria	Proteobacteria_Alphaproteobacteria_Rhodobacterales_Rhodobacteraceae_Cognatishimia_Cognatishimia-activa
RS_GCF_017798205_Bacteria	Proteobacteria_Alphaproteobacteria_Rhodobacterales_Rhodobacteraceae_Cognatishimia_Cognatishimia-activa_A
RS_GCF_900109295_Bacteria	Proteobacteria_Alphaproteobacteria_Rhodobacterales_Rhodobacteraceae_Cognatiyoonia_Cognatiyoonia-koreensis
RS_GCF_900109035_Bacteria	Proteobacteria_Alphaproteobacteria_Rhodobacterales_Rhodobacteraceae_Cribrihabitans_Cribrihabitans-marinus
RS_GCF_000018145_Bacteria	Proteobacteria_Alphaproteobacteria_Rhodobacterales_Rhodobacteraceae_Dinoroseobacter_Dinoroseobacter-shibae
RS_GCF_900115865_Bacteria	Proteobacteria_Alphaproteobacteria_Rhodobacterales_Rhodobacteraceae_Donghicola_Donghicola-eburneus
RS_GCF_013377535_Bacteria	Proteobacteria_Alphaproteobacteria_Rhodobacterales_Rhodobacteraceae_Donghicola_Donghicola-mangrovi
RS_GCF_003003355_Bacteria	Proteobacteria_Alphaproteobacteria_Rhodobacterales_Rhodobacteraceae_Donghicola_Donghicola-tyrosinivorans
GB_GCA_019218285_Bacteria	Proteobacteria_Alphaproteobacteria_Rhodobacterales_Rhodobacteraceae_DP3N28-2_DP3N28-2-sp019218285
GB_GCA_001650895_Bacteria	Proteobacteria_Alphaproteobacteria_Rhodobacterales_Rhodobacteraceae_EhC02_EhC02-sp001650895
RS_GCF_001458415_Bacteria	Proteobacteria_Alphaproteobacteria_Rhodobacterales_Rhodobacteraceae_Epibacterium_Epibacterium-multivorans
GB_GCA_001874255_Bacteria	Proteobacteria_Alphaproteobacteria_Rhodobacterales_Rhodobacteraceae_Epibacterium_Epibacterium-sp001874255
RS_GCF_003443995_Bacteria	Proteobacteria_Alphaproteobacteria_Rhodobacterales_Rhodobacteraceae_ETT8_ETT8-sp003443995
RS_GCF_004745575_Bacteria	Proteobacteria_Alphaproteobacteria_Rhodobacterales_Rhodobacteraceae_ETT8_ETT8-sp004745575
RS_GCF_009380135_Bacteria	Proteobacteria_Alphaproteobacteria_Rhodobacterales_Rhodobacteraceae_Fertoeibacter_Fertoeibacter-niger
RS_GCF_900184895_Bacteria	Proteobacteria_Alphaproteobacteria_Rhodobacterales_Rhodobacteraceae_Flavimaricola_Flavimaricola-marinus
RS_GCF_004000435_Bacteria	Proteobacteria_Alphaproteobacteria_Rhodobacterales_Rhodobacteraceae_Flavimaricola_Flavimaricola-sp004000435
RS_GCF_009908165_Bacteria	Proteobacteria_Alphaproteobacteria_Rhodobacterales_Rhodobacteraceae_Frigidibacter_Frigidibacter-albus
RS_GCF_001620265_Bacteria	Proteobacteria_Alphaproteobacteria_Rhodobacterales_Rhodobacteraceae_Frigidibacter_Frigidibacter-mobilis
RS_GCF_004216475_Bacteria	Proteobacteria_Alphaproteobacteria_Rhodobacterales_Rhodobacteraceae_GCA-004216475_GCA-004216475-sp004216475
GB_GCA_002747035_Bacteria	Proteobacteria_Alphaproteobacteria_Rhodobacterales_Rhodobacteraceae_GCA-2747035_GCA-2747035-sp002747035
GB_GCA_002748265_Bacteria	Proteobacteria_Alphaproteobacteria_Rhodobacterales_Rhodobacteraceae_GCA-2748265_GCA-2748265-sp002748265
GB_GCA_009908265_Bacteria	Proteobacteria_Alphaproteobacteria_Rhodobacterales_Rhodobacteraceae_Gemmobacter_B_Gemmobacter_B-sp009908265
RS_GCF_011059185_Bacteria	Proteobacteria_Alphaproteobacteria_Rhodobacterales_Rhodobacteraceae_Gemmobacter_B_Gemmobacter_B-sp011059185
RS_GCF_004799285_Bacteria	Proteobacteria_Alphaproteobacteria_Rhodobacterales_Rhodobacteraceae_Gemmobacter_D_Gemmobacter_D-aestuarii
RS_GCF_003570715_Bacteria	Proteobacteria_Alphaproteobacteria_Rhodobacterales_Rhodobacteraceae_Gemmobacter_Gemmobacter-lutimaris
GB_GCA_009830125_Bacteria	Proteobacteria_Alphaproteobacteria_Rhodobacterales_Rhodobacteraceae_GH1-50_GH1-50-sp009830125
RS_GCF_003333265_Bacteria	Proteobacteria_Alphaproteobacteria_Rhodobacterales_Rhodobacteraceae_Halocyntiibacter_A_Halocyntiibacter_A-alkanivorans
RS_GCF_013093415_Bacteria	Proteobacteria_Alphaproteobacteria_Rhodobacterales_Rhodobacteraceae_Halovulum_Halovulum-dunhuangense
GB_GCA_000472185_Bacteria	Proteobacteria_Alphaproteobacteria_Rhodobacterales_Rhodobacteraceae_HIMB11_HIMB11-sp000472185
GB_GCA_009920225_Bacteria	Proteobacteria_Alphaproteobacteria_Rhodobacterales_Rhodobacteraceae_HIMB11_HIMB11-sp009920225
GB_GCA_015689685_Bacteria	Proteobacteria_Alphaproteobacteria_Rhodobacterales_Rhodobacteraceae_HKCCE3408_HKCCE3408-sp015689685
GB_GCA_001314685_Bacteria	Proteobacteria_Alphaproteobacteria_Rhodobacterales_Rhodobacteraceae_HLUCCA09_HLUCCA09-sp001314685
RS_GCF_003340565_Bacteria	Proteobacteria_Alphaproteobacteria_Rhodobacterales_Rhodobacteraceae_HLUCCA09_HLUCCA09-sp003340565
GB_GCA_013003075_Bacteria	Proteobacteria_Alphaproteobacteria_Rhodobacterales_Rhodobacteraceae_IMCC34051_IMCC34051-sp013003075
GB_GCA_013042605_Bacteria	Proteobacteria_Alphaproteobacteria_Rhodobacterales_Rhodobacteraceae_IMCC34051_IMCC34051-sp013042605
GB_GCA_003697125_Bacteria	Proteobacteria_Alphaproteobacteria_Rhodobacterales_Rhodobacteraceae_J013_J013-sp003697125
GB_GCA_016704435_Bacteria	Proteobacteria_Alphaproteobacteria_Rhodobacterales_Rhodobacteraceae_JAAKGP01_JAAKGP01-sp016704435
GB_GCA_013003245_Bacteria	Proteobacteria_Alphaproteobacteria_Rhodobacterales_Rhodobacteraceae_JABDJX01_JABDJX01-sp013003245
GB_GCA_014762635_Bacteria	Proteobacteria_Alphaproteobacteria_Rhodobacterales_Rhodobacteraceae_JABURR01_JABURR01-sp014762635
GB_GCA_014763725_Bacteria	Proteobacteria_Alphaproteobacteria_Rhodobacterales_Rhodobacteraceae_JACXUX01_JACXUX01-sp014763725
GB_GCA_016278285_Bacteria	Proteobacteria_Alphaproteobacteria_Rhodobacterales_Rhodobacteraceae_JADQCB01_JADQCB01-sp016278285
GB_GCA_016278325_Bacteria	Proteobacteria_Alphaproteobacteria_Rhodobacterales_Rhodobacteraceae_JADQCB01_JADQCB01-sp016278325
GB_GCA_017854585_Bacteria	Proteobacteria_Alphaproteobacteria_Rhodobacterales_Rhodobacteraceae_JAFMHK01_JAFMHK01-sp017854585
RS_GCF_018139985_Bacteria	Proteobacteria_Alphaproteobacteria_Rhodobacterales_Rhodobacteraceae_JAGSOU01_JAGSOU01-sp018139985
RS_GCF_001403735_Bacteria	Proteobacteria_Alphaproteobacteria_Rhodobacterales_Rhodobacteraceae_Jannaschia_Jannaschia-rubra
RS_GCF_016820245_Bacteria	Proteobacteria_Alphaproteobacteria_Rhodobacterales_Rhodobacteraceae_Jannaschia_Jannaschia-sp016820245
RS_GCF_003352045_Bacteria	Proteobacteria_Alphaproteobacteria_Rhodobacterales_Rhodobacteraceae_JL08_JL08-sp003352045
RS_GCF_001458395_Bacteria	Proteobacteria_Alphaproteobacteria_Rhodobacterales_Rhodobacteraceae_Leisingera_Leisingera-aquaemixtae
RS_GCF_000473165_Bacteria	Proteobacteria_Alphaproteobacteria_Rhodobacterales_Rhodobacteraceae_Leisingera_Leisingera-aquimarina
RS_GCF_000473325_Bacteria	Proteobacteria_Alphaproteobacteria_Rhodobacterales_Rhodobacteraceae_Leisingera_Leisingera-caerulea
RS_GCF_000473145_Bacteria	Proteobacteria_Alphaproteobacteria_Rhodobacterales_Rhodobacteraceae_Leisingera_Leisingera-daeponensis
RS_GCF_000511355_Bacteria	Proteobacteria_Alphaproteobacteria_Rhodobacterales_Rhodobacteraceae_Leisingera_Leisingera-methylohalidivorans
RS_GCF_000813725_Bacteria	Proteobacteria_Alphaproteobacteria_Rhodobacterales_Rhodobacteraceae_Leisingera_Leisingera-sp000813725
RS_GCF_000813745_Bacteria	Proteobacteria_Alphaproteobacteria_Rhodobacterales_Rhodobacteraceae_Leisingera_Leisingera-sp000813745
RS_GCF_001679925_Bacteria	Proteobacteria_Alphaproteobacteria_Rhodobacterales_Rhodobacteraceae_Leisingera_Leisingera-sp001679925
RS_GCF_004123675_Bacteria	Proteobacteria_Alphaproteobacteria_Rhodobacterales_Rhodobacteraceae_Leisingera_Leisingera-sp004123675
GB_GCA_011525185_Bacteria	Proteobacteria_Alphaproteobacteria_Rhodobacterales_Rhodobacteraceae_LFER01_LFER01-sp011525185
GB_GCA_001642945_Bacteria	Proteobacteria_Alphaproteobacteria_Rhodobacterales_Rhodobacteraceae_LGRT01_LGRT01-sp001642945
GB_GCA_016778765_Bacteria	Proteobacteria_Alphaproteobacteria_Rhodobacterales_Rhodobacteraceae_LGRT01_LGRT01-sp016778765
RS_GCF_016623495_Bacteria	Proteobacteria_Alphaproteobacteria_Rhodobacterales_Rhodobacteraceae_Limibaculum_Limibaculum-sp016623495
RS_GCF_900172345_Bacteria	Proteobacteria_Alphaproteobacteria_Rhodobacterales_Rhodobacteraceae_Limimaricola_Limimaricola-soesokkakensis
RS_GCF_900107015_Bacteria	Proteobacteria_Alphaproteobacteria_Rhodobacterales_Rhodobacteraceae_Litoreibacter_Litoreibacter-albidus
RS_GCF_000442275_Bacteria	Proteobacteria_Alphaproteobacteria_Rhodobacterales_Rhodobacteraceae_Litoreibacter_Litoreibacter-arenae
RS_GCF_900129235_Bacteria	Proteobacteria_Alphaproteobacteria_Rhodobacterales_Rhodobacteraceae_Litoreibacter_Litoreibacter-ascidiaceicola
RS_GCF_004365635_Bacteria	Proteobacteria_Alphaproteobacteria_Rhodobacterales_Rhodobacteraceae_Litoreibacter_Litoreibacter-halocynthiae
RS_GCF_900111945_Bacteria	Proteobacteria_Alphaproteobacteria_Rhodobacterales_Rhodobacteraceae_Litoreibacter_Litoreibacter-janthinus
RS_GCF_003663885_Bacteria	Proteobacteria_Alphaproteobacteria_Rhodobacterales_Rhodobacteraceae_Litoreibacter_Litoreibacter-meonggei
RS_GCF_003054285_Bacteria	Proteobacteria_Alphaproteobacteria_Rhodobacterales_Rhodobacteraceae_Litoreibacter_Litoreibacter-ponti
RS_GCF_003205515_Bacteria	Proteobacteria_Alphaproteobacteria_Rhodobacterales_Rhodobacteraceae_Litorivita_Litorivita-pollutaquae
RS_GCF_900114485_Bacteria	Proteobacteria_Alphaproteobacteria_Rhodobacterales_Rhodobacteraceae_Loktanella_Loktanella-salsilacus
RS_GCF_001420005_Bacteria	Proteobacteria_Alphaproteobacteria_Rhodobacterales_Rhodobacteraceae_Loktanella_Loktanella-sp001420005
RS_GCF_018263905_Bacteria	Proteobacteria_Alphaproteobacteria_Rhodobacterales_Rhodobacteraceae_Loktanella_Loktanella-sp018263905
RS_GCF_900142185_Bacteria	Proteobacteria_Alphaproteobacteria_Rhodobacterales_Rhodobacteraceae_Lutimaribacter_Lutimaribacter-pacificus
RS_GCF_900100005_Bacteria	Proteobacteria_Alphaproteobacteria_Rhodobacterales_Rhodobacteraceae_Lutimaribacter_Lutimaribacter-saemankumensis
RS_GCF_000526275_Bacteria	Proteobacteria_Alphaproteobacteria_Rhodobacterales_Rhodobacteraceae_Lutimaribacter_Lutimaribacter-sp000526275
GB_GCA_009924775_Bacteria	Proteobacteria_Alphaproteobacteria_Rhodobacterales_Rhodobacteraceae_Lutimaribacter_Lutimaribacter-sp009924775
GB_GCA_018401385_Bacteria	Proteobacteria_Alphaproteobacteria_Rhodobacterales_Rhodobacteraceae_M30B80_M30B80-sp018401385
RS_GCF_900184945_Bacteria	Proteobacteria_Alphaproteobacteria_Rhodobacterales_Rhodobacteraceae_Maliponia_Maliponia-aquimaris
RS_GCF_900101505_Bacteria	Proteobacteria_Alphaproteobacteria_Rhodobacterales_Rhodobacteraceae_Mameliella_Mameliella-alba
RS_GCF_013184745_Bacteria	Proteobacteria_Alphaproteobacteria_Rhodobacterales_Rhodobacteraceae_Mangrovicoccus_Mangrovicoccus-sp013184745
RS_GCF_005434965_Bacteria	Proteobacteria_Alphaproteobacteria_Rhodobacterales_Rhodobacteraceae_Marimonas_Marimonas-lutisalis
RS_GCF_002210095_Bacteria	Proteobacteria_Alphaproteobacteria_Rhodobacterales_Rhodobacteraceae_Marinibacterium_Marinibacterium-profundimaris
GB_GCA_002709405_Bacteria	Proteobacteria_Alphaproteobacteria_Rhodobacterales_Rhodobacteraceae_Marinibacterium_Marinibacterium-sp002709405
GB_GCA_003217735_Bacteria	Proteobacteria_Alphaproteobacteria_Rhodobacterales_Rhodobacteraceae_Marinibacterium_Marinibacterium-sp003217735
GB_GCA_006226775_Bacteria	Proteobacteria_Alphaproteobacteria_Rhodobacterales_Rhodobacteraceae_Marinovum_Marinovum-sp006226775
RS_GCF_000152805_Bacteria	Proteobacteria_Alphaproteobacteria_Rhodobacterales_Rhodobacteraceae_Maritimibacter_Maritimibacter-alkaliphilus
RS_GCF_009882975_Bacteria	Proteobacteria_Alphaproteobacteria_Rhodobacterales_Rhodobacteraceae_Maritimibacter_Maritimibacter-harenae
GB_GCA_001626765_Bacteria	Proteobacteria_Alphaproteobacteria_Rhodobacterales_Rhodobacteraceae_Maritimibacter_Maritimibacter-sp001626765
GB_GCA_002695005_Bacteria	Proteobacteria_Alphaproteobacteria_Rhodobacterales_Rhodobacteraceae_Maritimibacter_Maritimibacter-sp002695005
GB_GCA_011389895_Bacteria	Proteobacteria_Alphaproteobacteria_Rhodobacterales_Rhodobacteraceae_Maritimibacter_Maritimibacter-sp011389895
RS_GCF_019218265_Bacteria	Proteobacteria_Alphaproteobacteria_Rhodobacterales_Rhodobacteraceae_Maritimibacter_Maritimibacter-sp019218265
RS_GCF_019218295_Bacteria	Proteobacteria_Alphaproteobacteria_Rhodobacterales_Rhodobacteraceae_Maritimibacter_Maritimibacter-sp019218295
RS_GCF_002115725_Bacteria	Proteobacteria_Alphaproteobacteria_Rhodobacterales_Rhodobacteraceae_Marivita_Marivita-cryptomonadis
RS_GCF_002115805_Bacteria	Proteobacteria_Alphaproteobacteria_Rhodobacterales_Rhodobacteraceae_Marivita_Marivita-geojedonensis
RS_GCF_900129875_Bacteria	Proteobacteria_Alphaproteobacteria_Rhodobacterales_Rhodobacteraceae_Marivita_Marivita-hallyeonensis
RS_GCF_014637725_Bacteria	Proteobacteria_Alphaproteobacteria_Rhodobacterales_Rhodobacteraceae_Marivita_Marivita-lacus
GB_GCA_003149565_Bacteria	Proteobacteria_Alphaproteobacteria_Rhodobacterales_Rhodobacteraceae_Marivita_Marivita-sp003149565
RS_GCF_015220045_Bacteria	Proteobacteria_Alphaproteobacteria_Rhodobacterales_Rhodobacteraceae_Marivivens_Marivivens-aquimaris
RS_GCF_011806565_Bacteria	Proteobacteria_Alphaproteobacteria_Rhodobacterales_Rhodobacteraceae_Marivivens_Marivivens-donghaensis
RS_GCF_002150005_Bacteria	Proteobacteria_Alphaproteobacteria_Rhodobacterales_Rhodobacteraceae_Marivivens_Marivivens-niveibacter
RS_GCF_001908835_Bacteria	Proteobacteria_Alphaproteobacteria_Rhodobacterales_Rhodobacteraceae_Marivivens_Marivivens-sp001908835
GB_GCA_009920775_Bacteria	Proteobacteria_Alphaproteobacteria_Rhodobacterales_Rhodobacteraceae_Marivivens_Marivivens-sp009920775
RS_GCF_002850435_Bacteria	Proteobacteria_Alphaproteobacteria_Rhodobacterales_Rhodobacteraceae_Marivivens_Marivivens-zhoushanense
GB_GCA_016918935_Bacteria	Proteobacteria_Alphaproteobacteria_Rhodobacterales_Rhodobacteraceae_MCCB-386_MCCB-386-sp016918935
GB_GCA_002457055_Bacteria	Proteobacteria_Alphaproteobacteria_Rhodobacterales_Rhodobacteraceae_MED-G52_MED-G52-sp002457055
GB_GCA_002711145_Bacteria	Proteobacteria_Alphaproteobacteria_Rhodobacterales_Rhodobacteraceae_MED-G52_MED-G52-sp002711145
GB_GCA_003332035_Bacteria	Proteobacteria_Alphaproteobacteria_Rhodobacterales_Rhodobacteraceae_MED-G52_MED-G52-sp003332035
GB_GCA_902534325_Bacteria	Proteobacteria_Alphaproteobacteria_Rhodobacterales_Rhodobacteraceae_MED-G52_MED-G52-sp902534325
GB_GCA_902602765_Bacteria	Proteobacteria_Alphaproteobacteria_Rhodobacterales_Rhodobacteraceae_MED-G52_MED-G52-sp902602765
GB_GCA_902635985_Bacteria	Proteobacteria_Alphaproteobacteria_Rhodobacterales_Rhodobacteraceae_MED-G52_MED-G52-sp902635985
RS_GCF_900102905_Bacteria	Proteobacteria_Alphaproteobacteria_Rhodobacterales_Rhodobacteraceae_Meinhardsimonia_Meinhardsimonia-xiamenensis
RS_GCF_001049735_Bacteria	Proteobacteria_Alphaproteobacteria_Rhodobacterales_Rhodobacteraceae_Nereida_Nereida-ignava
RS_GCF_001879715_Bacteria	Proteobacteria_Alphaproteobacteria_Rhodobacterales_Rhodobacteraceae_Nioella_Nioella-nitratireducens
RS_GCF_004000255_Bacteria	Proteobacteria_Alphaproteobacteria_Rhodobacterales_Rhodobacteraceae_Nioella_Nioella-ostreopsis
GB_GCA_003428585_Bacteria	Proteobacteria_Alphaproteobacteria_Rhodobacterales_Rhodobacteraceae_Nioella_Nioella-sp003428585
GB_GCA_002732955_Bacteria	Proteobacteria_Alphaproteobacteria_Rhodobacterales_Rhodobacteraceae_NORP110_NORP110-sp002732955
GB_GCA_019090885_Bacteria	Proteobacteria_Alphaproteobacteria_Rhodobacterales_Rhodobacteraceae_NORP110_NORP110-sp019090885
GB_GCA_002400675_Bacteria	Proteobacteria_Alphaproteobacteria_Rhodobacterales_Rhodobacteraceae_NORP181_NORP181-sp002400675
RS_GCF_003057885_Bacteria	Proteobacteria_Alphaproteobacteria_Rhodobacterales_Rhodobacteraceae_Oceaniglobus_Oceaniglobus-ichthyenteri
RS_GCF_002869745_Bacteria	Proteobacteria_Alphaproteobacteria_Rhodobacterales_Rhodobacteraceae_Oceaniglobus_Oceaniglobus-roseus
RS_GCF_008085915_Bacteria	Proteobacteria_Alphaproteobacteria_Rhodobacterales_Rhodobacteraceae_Oceaniglobus_Oceaniglobus-sp008085915
RS_GCF_900185015_Bacteria	Proteobacteria_Alphaproteobacteria_Rhodobacterales_Rhodobacteraceae_Octadecabacter_Octadecabacter-ascidiaceicola
RS_GCF_018861045_Bacteria	Proteobacteria_Alphaproteobacteria_Rhodobacterales_Rhodobacteraceae_Octadecabacter_Octadecabacter-sp018861045
RS_GCF_001187845_Bacteria	Proteobacteria_Alphaproteobacteria_Rhodobacterales_Rhodobacteraceae_Octadecabacter_Octadecabacter-temperatus
GB_GCA_900313015_Bacteria	Proteobacteria_Alphaproteobacteria_Rhodobacterales_Rhodobacteraceae_OMPR01_OMPR01-sp900313015
RS_GCF_900109555_Bacteria	Proteobacteria_Alphaproteobacteria_Rhodobacterales_Rhodobacteraceae_Pacificibacter_Pacificibacter-marinus
RS_GCF_018860665_Bacteria	Proteobacteria_Alphaproteobacteria_Rhodobacterales_Rhodobacteraceae_Pacificibacter_Pacificibacter-marinus_A
RS_GCF_018860505_Bacteria	Proteobacteria_Alphaproteobacteria_Rhodobacterales_Rhodobacteraceae_Pacificibacter_Pacificibacter-marinus_B
RS_GCF_002504165_Bacteria	Proteobacteria_Alphaproteobacteria_Rhodobacterales_Rhodobacteraceae_Pacificitalea_Pacificitalea-manganoxidans
RS_GCF_003253995_Bacteria	Proteobacteria_Alphaproteobacteria_Rhodobacterales_Rhodobacteraceae_Palleronia_Palleronia-aestuarii
RS_GCF_007004065_Bacteria	Proteobacteria_Alphaproteobacteria_Rhodobacterales_Rhodobacteraceae_Palleronia_Palleronia-caenipelagi
RS_GCF_900110115_Bacteria	Proteobacteria_Alphaproteobacteria_Rhodobacterales_Rhodobacteraceae_Palleronia_Palleronia-pelagia
RS_GCF_000743715_Bacteria	Proteobacteria_Alphaproteobacteria_Rhodobacterales_Rhodobacteraceae_Palleronia_Palleronia-rufa
RS_GCF_009363795_Bacteria	Proteobacteria_Alphaproteobacteria_Rhodobacterales_Rhodobacteraceae_Palleronia_Palleronia-sp900609015
RS_GCF_003697785_Bacteria	Proteobacteria_Alphaproteobacteria_Rhodobacterales_Rhodobacteraceae_Paracoccus_Paracoccus-alkanivorans
RS_GCF_900108405_Bacteria	Proteobacteria_Alphaproteobacteria_Rhodobacterales_Rhodobacteraceae_Paracoccus_Paracoccus-alkenifer
RS_GCF_900100045_Bacteria	Proteobacteria_Alphaproteobacteria_Rhodobacterales_Rhodobacteraceae_Paracoccus_Paracoccus-denitrificans
RS_GCF_005048225_Bacteria	Proteobacteria_Alphaproteobacteria_Rhodobacterales_Rhodobacteraceae_Paracoccus_Paracoccus-gahaiensis
RS_GCF_000763905_Bacteria	Proteobacteria_Alphaproteobacteria_Rhodobacterales_Rhodobacteraceae_Paracoccus_Paracoccus-halophilus
RS_GCF_003007735_Bacteria	Proteobacteria_Alphaproteobacteria_Rhodobacterales_Rhodobacteraceae_Paracoccus_Paracoccus-marinus_A
RS_GCF_008824185_Bacteria	Proteobacteria_Alphaproteobacteria_Rhodobacterales_Rhodobacteraceae_Paracoccus_Paracoccus-pantotrophus
GB_GCA_900156835_Bacteria	Proteobacteria_Alphaproteobacteria_Rhodobacterales_Rhodobacteraceae_Paracoccus_Paracoccus-saliphilus
RS_GCF_900188295_Bacteria	Proteobacteria_Alphaproteobacteria_Rhodobacterales_Rhodobacteraceae_Paracoccus_Paracoccus-sediminis
RS_GCF_900142875_Bacteria	Proteobacteria_Alphaproteobacteria_Rhodobacterales_Rhodobacteraceae_Paracoccus_Paracoccus-solventivorans
RS_GCF_017744015_Bacteria	Proteobacteria_Alphaproteobacteria_Rhodobacterales_Rhodobacteraceae_Paracoccus_Paracoccus-sp002732665
RS_GCF_009696685_Bacteria	Proteobacteria_Alphaproteobacteria_Rhodobacterales_Rhodobacteraceae_Paracoccus_Paracoccus-sp009696685
RS_GCF_017315735_Bacteria	Proteobacteria_Alphaproteobacteria_Rhodobacterales_Rhodobacteraceae_Paracoccus_Paracoccus-sp017315735
RS_GCF_000763805_Bacteria	Proteobacteria_Alphaproteobacteria_Rhodobacterales_Rhodobacteraceae_Paracoccus_Paracoccus-sphaerophysae
RS_GCF_004310345_Bacteria	Proteobacteria_Alphaproteobacteria_Rhodobacterales_Rhodobacteraceae_Paracoccus_Paracoccus-subflavus
RS_GCF_003324675_Bacteria	Proteobacteria_Alphaproteobacteria_Rhodobacterales_Rhodobacteraceae_Paracoccus_Paracoccus-suum
RS_GCF_900156255_Bacteria	Proteobacteria_Alphaproteobacteria_Rhodobacterales_Rhodobacteraceae_Paracoccus_Paracoccus-thiocyanatus
RS_GCF_000763885_Bacteria	Proteobacteria_Alphaproteobacteria_Rhodobacterales_Rhodobacteraceae_Paracoccus_Paracoccus-versutus
RS_GCF_011308835_Bacteria	Proteobacteria_Alphaproteobacteria_Rhodobacterales_Rhodobacteraceae_Paracoccus_Paracoccus-xiamenensis
RS_GCF_003075525_Bacteria	Proteobacteria_Alphaproteobacteria_Rhodobacterales_Rhodobacteraceae_Pararhodobacter_Pararhodobacter-aggregans
RS_GCF_001691415_Bacteria	Proteobacteria_Alphaproteobacteria_Rhodobacterales_Rhodobacteraceae_Pararhodobacter_Pararhodobacter-sp001691415
GB_GCA_007117005_Bacteria	Proteobacteria_Alphaproteobacteria_Rhodobacterales_Rhodobacteraceae_Pararhodobacter_Pararhodobacter-sp007117005
RS_GCF_017303295_Bacteria	Proteobacteria_Alphaproteobacteria_Rhodobacterales_Rhodobacteraceae_Pararhodobacter_Pararhodobacter-sp017303295
RS_GCF_003990445_Bacteria	Proteobacteria_Alphaproteobacteria_Rhodobacterales_Rhodobacteraceae_Pararhodobacter_Pararhodobacter-zhoushanensis
RS_GCF_009753675_Bacteria	Proteobacteria_Alphaproteobacteria_Rhodobacterales_Rhodobacteraceae_Parasedimentitalea_Parasedimentitalea-huanghaiensis
RS_GCF_004006175_Bacteria	Proteobacteria_Alphaproteobacteria_Rhodobacterales_Rhodobacteraceae_Parasedimentitalea_Parasedimentitalea-marina
RS_GCF_005771405_Bacteria	Proteobacteria_Alphaproteobacteria_Rhodobacterales_Rhodobacteraceae_Parasedimentitalea_Parasedimentitalea-marina_A
GB_GCA_002162795_Bacteria	Proteobacteria_Alphaproteobacteria_Rhodobacterales_Rhodobacteraceae_Parasedimentitalea_Parasedimentitalea-sp002162795
GB_GCA_002401945_Bacteria	Proteobacteria_Alphaproteobacteria_Rhodobacterales_Rhodobacteraceae_Parasedimentitalea_Parasedimentitalea-sp002401945
RS_GCF_011813015_Bacteria	Proteobacteria_Alphaproteobacteria_Rhodobacterales_Rhodobacteraceae_Parasedimentitalea_Parasedimentitalea-sp011813015
GB_GCA_013214575_Bacteria	Proteobacteria_Alphaproteobacteria_Rhodobacterales_Rhodobacteraceae_Parasedimentitalea_Parasedimentitalea-sp013214575
RS_GCF_004364805_Bacteria	Proteobacteria_Alphaproteobacteria_Rhodobacterales_Rhodobacteraceae_Pelagimonas_Pelagimonas-phthalicica
RS_GCF_004804335_Bacteria	Proteobacteria_Alphaproteobacteria_Rhodobacterales_Rhodobacteraceae_Pelagimonas_Pelagimonas-sp004804335
RS_GCF_003208435_Bacteria	Proteobacteria_Alphaproteobacteria_Rhodobacterales_Rhodobacteraceae_Pelagimonas_Pelagimonas-varians
RS_GCF_007923355_Bacteria	Proteobacteria_Alphaproteobacteria_Rhodobacterales_Rhodobacteraceae_Phaeobacter_A_Phaeobacter_A-marinintestinus
RS_GCF_000511385_Bacteria	Proteobacteria_Alphaproteobacteria_Rhodobacterales_Rhodobacteraceae_Phaeobacter_Phaeobacter-gallaeciensis
RS_GCF_000473105_Bacteria	Proteobacteria_Alphaproteobacteria_Rhodobacterales_Rhodobacteraceae_Phaeobacter_Phaeobacter-inhibens
RS_GCF_001258055_Bacteria	Proteobacteria_Alphaproteobacteria_Rhodobacterales_Rhodobacteraceae_Phaeobacter_Phaeobacter-italicus
RS_GCF_002407245_Bacteria	Proteobacteria_Alphaproteobacteria_Rhodobacterales_Rhodobacteraceae_Phaeobacter_Phaeobacter-piscinae
RS_GCF_001888185_Bacteria	Proteobacteria_Alphaproteobacteria_Rhodobacterales_Rhodobacteraceae_Phaeobacter_Phaeobacter-porticola
GB_GCA_002422085_Bacteria	Proteobacteria_Alphaproteobacteria_Rhodobacterales_Rhodobacteraceae_Phaeovulum_Phaeovulum-sp002422085
RS_GCF_003034995_Bacteria	Proteobacteria_Alphaproteobacteria_Rhodobacterales_Rhodobacteraceae_Phaeovulum_Phaeovulum-veldkampii
GB_GCA_000981705_Bacteria	Proteobacteria_Alphaproteobacteria_Rhodobacterales_Rhodobacteraceae_Planktomarina_Planktomarina-sp000981705
GB_GCA_002698165_Bacteria	Proteobacteria_Alphaproteobacteria_Rhodobacterales_Rhodobacteraceae_Planktomarina_Planktomarina-sp002698165
GB_GCA_905182195_Bacteria	Proteobacteria_Alphaproteobacteria_Rhodobacterales_Rhodobacteraceae_Planktomarina_Planktomarina-sp905182195
GB_GCA_905182455_Bacteria	Proteobacteria_Alphaproteobacteria_Rhodobacterales_Rhodobacteraceae_Planktomarina_Planktomarina-sp905182455
GB_GCA_905182535_Bacteria	Proteobacteria_Alphaproteobacteria_Rhodobacterales_Rhodobacteraceae_Planktomarina_Planktomarina-sp905182535
RS_GCF_000738435_Bacteria	Proteobacteria_Alphaproteobacteria_Rhodobacterales_Rhodobacteraceae_Planktomarina_Planktomarina-temperata
GB_GCA_000156115_Bacteria	Proteobacteria_Alphaproteobacteria_Rhodobacterales_Rhodobacteraceae_Planktotalea_Planktotalea-sp000156115
GB_GCA_018607965_Bacteria	Proteobacteria_Alphaproteobacteria_Rhodobacterales_Rhodobacteraceae_Planktotalea_Planktotalea-sp018607965
GB_GCA_018607995_Bacteria	Proteobacteria_Alphaproteobacteria_Rhodobacterales_Rhodobacteraceae_Planktotalea_Planktotalea-sp018607995
RS_GCF_016307205_Bacteria	Proteobacteria_Alphaproteobacteria_Rhodobacterales_Rhodobacteraceae_Pontibaca_Pontibaca-sp016307205
RS_GCF_001482405_Bacteria	Proteobacteria_Alphaproteobacteria_Rhodobacterales_Rhodobacteraceae_Ponticoccus_Ponticoccus-marisrubri
RS_GCF_900111875_Bacteria	Proteobacteria_Alphaproteobacteria_Rhodobacterales_Rhodobacteraceae_Poseidonocella_Poseidonocella-pacifica
RS_GCF_900116005_Bacteria	Proteobacteria_Alphaproteobacteria_Rhodobacterales_Rhodobacteraceae_Poseidonocella_Poseidonocella-sedimentorum
RS_GCF_900176485_Bacteria	Proteobacteria_Alphaproteobacteria_Rhodobacterales_Rhodobacteraceae_Primorskyibacter_Primorskyibacter-flagellatus_A
RS_GCF_003313245_Bacteria	Proteobacteria_Alphaproteobacteria_Rhodobacterales_Rhodobacteraceae_Primorskyibacter_Primorskyibacter-marinus
RS_GCF_004342065_Bacteria	Proteobacteria_Alphaproteobacteria_Rhodobacterales_Rhodobacteraceae_Primorskyibacter_Primorskyibacter-sedentarius
RS_GCF_003544895_Bacteria	Proteobacteria_Alphaproteobacteria_Rhodobacterales_Rhodobacteraceae_Profundibacter_Profundibacter-amoris
GB_GCA_002732995_Bacteria	Proteobacteria_Alphaproteobacteria_Rhodobacterales_Rhodobacteraceae_Profundibacter_Profundibacter-sp002732995
GB_GCA_015488685_Bacteria	Proteobacteria_Alphaproteobacteria_Rhodobacterales_Rhodobacteraceae_Profundibacter_Profundibacter-sp015488685
RS_GCF_009835145_Bacteria	Proteobacteria_Alphaproteobacteria_Rhodobacterales_Rhodobacteraceae_Profundibacterium_Profundibacterium-mesophilum
RS_GCF_001205715_Bacteria	Proteobacteria_Alphaproteobacteria_Rhodobacterales_Rhodobacteraceae_Pseudaestuariivita_Pseudaestuariivita-atlantica
RS_GCF_900609055_Bacteria	Proteobacteria_Alphaproteobacteria_Rhodobacterales_Rhodobacteraceae_Pseudogemmobacter_Pseudogemmobacter-humi
RS_GCF_018457175_Bacteria	Proteobacteria_Alphaproteobacteria_Rhodobacterales_Rhodobacteraceae_Pseudohalocynthiibacter_Pseudohalocynthiibacter-aestuariivivens
RS_GCF_000768315_Bacteria	Proteobacteria_Alphaproteobacteria_Rhodobacterales_Rhodobacteraceae_Pseudooceanicola_Pseudooceanicola-atlanticus
RS_GCF_900109195_Bacteria	Proteobacteria_Alphaproteobacteria_Rhodobacterales_Rhodobacteraceae_Pseudooceanicola_Pseudooceanicola-nitratireducens
RS_GCF_004959925_Bacteria	Proteobacteria_Alphaproteobacteria_Rhodobacterales_Rhodobacteraceae_Pseudooceanicola_Pseudooceanicola-onchidii
RS_GCF_009789075_Bacteria	Proteobacteria_Alphaproteobacteria_Rhodobacterales_Rhodobacteraceae_Pseudooceanicola_Pseudooceanicola-pacificus
RS_GCF_002210105_Bacteria	Proteobacteria_Alphaproteobacteria_Rhodobacterales_Rhodobacteraceae_Pseudooceanicola_Pseudooceanicola-sp002210105
GB_GCA_002709085_Bacteria	Proteobacteria_Alphaproteobacteria_Rhodobacterales_Rhodobacteraceae_Pseudooceanicola_Pseudooceanicola-sp002709085
RS_GCF_001678945_Bacteria	Proteobacteria_Alphaproteobacteria_Rhodobacterales_Rhodobacteraceae_Pseudophaeobacter_A_Pseudophaeobacter_A-gallaeciensis_A
RS_GCF_014884385_Bacteria	Proteobacteria_Alphaproteobacteria_Rhodobacterales_Rhodobacteraceae_Pseudophaeobacter_A_Pseudophaeobacter_A-sp014884385
RS_GCF_000473205_Bacteria	Proteobacteria_Alphaproteobacteria_Rhodobacterales_Rhodobacteraceae_Pseudophaeobacter_Pseudophaeobacter-arcticus
RS_GCF_002087335_Bacteria	Proteobacteria_Alphaproteobacteria_Rhodobacterales_Rhodobacteraceae_Pseudophaeobacter_Pseudophaeobacter-leonis
RS_GCF_000152965_Bacteria	Proteobacteria_Alphaproteobacteria_Rhodobacterales_Rhodobacteraceae_Pseudophaeobacter_Pseudophaeobacter-sp000152965
RS_GCF_001294455_Bacteria	Proteobacteria_Alphaproteobacteria_Rhodobacterales_Rhodobacteraceae_Pseudophaeobacter_Pseudophaeobacter-sp001294455
RS_GCF_001457775_Bacteria	Proteobacteria_Alphaproteobacteria_Rhodobacterales_Rhodobacteraceae_Pseudophaeobacter_Pseudophaeobacter-sp001457775
GB_GCA_015665415_Bacteria	Proteobacteria_Alphaproteobacteria_Rhodobacterales_Rhodobacteraceae_Pseudophaeobacter_Pseudophaeobacter-sp015665415
RS_GCF_900313025_Bacteria	Proteobacteria_Alphaproteobacteria_Rhodobacterales_Rhodobacteraceae_Pseudophaeobacter_Pseudophaeobacter-sp900313025
GB_GCA_905479575_Bacteria	Proteobacteria_Alphaproteobacteria_Rhodobacterales_Rhodobacteraceae_Pseudophaeobacter_Pseudophaeobacter-sp905479575
RS_GCF_900110135_Bacteria	Proteobacteria_Alphaproteobacteria_Rhodobacterales_Rhodobacteraceae_Pseudorhodobacter_Pseudorhodobacter-antarcticus
RS_GCF_001202025_Bacteria	Proteobacteria_Alphaproteobacteria_Rhodobacterales_Rhodobacteraceae_Pseudorhodobacter_Pseudorhodobacter-aquimaris
RS_GCF_000420745_Bacteria	Proteobacteria_Alphaproteobacteria_Rhodobacterales_Rhodobacteraceae_Pseudorhodobacter_Pseudorhodobacter-ferrugineus
RS_GCF_003991405_Bacteria	Proteobacteria_Alphaproteobacteria_Rhodobacterales_Rhodobacteraceae_Pseudorhodobacter_Pseudorhodobacter-sp003991405
RS_GCF_016765775_Bacteria	Proteobacteria_Alphaproteobacteria_Rhodobacterales_Rhodobacteraceae_Pseudorhodobacter_Pseudorhodobacter-sp016765775
RS_GCF_005234135_Bacteria	Proteobacteria_Alphaproteobacteria_Rhodobacterales_Rhodobacteraceae_Pseudorhodobacter_Pseudorhodobacter-turbinis
RS_GCF_001202035_Bacteria	Proteobacteria_Alphaproteobacteria_Rhodobacterales_Rhodobacteraceae_Pseudorhodobacter_Pseudorhodobacter-wandonensis
RS_GCF_007923445_Bacteria	Proteobacteria_Alphaproteobacteria_Rhodobacterales_Rhodobacteraceae_Puniceibacterium_Puniceibacterium-confluentis
RS_GCF_003344785_Bacteria	Proteobacteria_Alphaproteobacteria_Rhodobacterales_Rhodobacteraceae_Puniceibacterium_Puniceibacterium-profundi
RS_GCF_900188035_Bacteria	Proteobacteria_Alphaproteobacteria_Rhodobacterales_Rhodobacteraceae_Puniceibacterium_Puniceibacterium-sediminis
RS_GCF_001038505_Bacteria	Proteobacteria_Alphaproteobacteria_Rhodobacterales_Rhodobacteraceae_Puniceibacterium_Puniceibacterium-sp001038505
GB_GCA_007123625_Bacteria	Proteobacteria_Alphaproteobacteria_Rhodobacterales_Rhodobacteraceae_PUOA01_PUOA01-sp007123625
RS_GCF_001078595_Bacteria	Proteobacteria_Alphaproteobacteria_Rhodobacterales_Rhodobacteraceae_Rhodobacter_B_Rhodobacter_B-lobularis
RS_GCF_013184805_Bacteria	Proteobacteria_Alphaproteobacteria_Rhodobacterales_Rhodobacteraceae_Rhodobacter_B_Rhodobacter_B-sp013184805
GB_GCA_017792445_Bacteria	Proteobacteria_Alphaproteobacteria_Rhodobacterales_Rhodobacteraceae_Rhodobacter_B_Rhodobacter_B-sp017792445
GB_GCA_007827395_Bacteria	Proteobacteria_Alphaproteobacteria_Rhodobacterales_Rhodobacteraceae_Rhodophyticola_Rhodophyticola-sp007827395
RS_GCF_003385555_Bacteria	Proteobacteria_Alphaproteobacteria_Rhodobacterales_Rhodobacteraceae_Rhodosalinus_Rhodosalinus-sediminis
RS_GCF_003298775_Bacteria	Proteobacteria_Alphaproteobacteria_Rhodobacterales_Rhodobacteraceae_Rhodosalinus_Rhodosalinus-sp003298775
RS_GCF_004345735_Bacteria	Proteobacteria_Alphaproteobacteria_Rhodobacterales_Rhodobacteraceae_Rhodovulum_Rhodovulum-adriaticum
RS_GCF_004343505_Bacteria	Proteobacteria_Alphaproteobacteria_Rhodobacterales_Rhodobacteraceae_Rhodovulum_Rhodovulum-bhavnagarense
RS_GCF_004342445_Bacteria	Proteobacteria_Alphaproteobacteria_Rhodobacterales_Rhodobacteraceae_Rhodovulum_Rhodovulum-euryhalinum
RS_GCF_003046545_Bacteria	Proteobacteria_Alphaproteobacteria_Rhodobacterales_Rhodobacteraceae_Rhodovulum_Rhodovulum-imhoffii
RS_GCF_003053725_Bacteria	Proteobacteria_Alphaproteobacteria_Rhodobacterales_Rhodobacteraceae_Rhodovulum_Rhodovulum-kholense
RS_GCF_004343075_Bacteria	Proteobacteria_Alphaproteobacteria_Rhodobacterales_Rhodobacteraceae_Rhodovulum_Rhodovulum-marinum
RS_GCF_003944755_Bacteria	Proteobacteria_Alphaproteobacteria_Rhodobacterales_Rhodobacteraceae_Rhodovulum_Rhodovulum-robiginosum
RS_GCF_002073975_Bacteria	Proteobacteria_Alphaproteobacteria_Rhodobacterales_Rhodobacteraceae_Rhodovulum_Rhodovulum-sp002073975
RS_GCF_002079305_Bacteria	Proteobacteria_Alphaproteobacteria_Rhodobacterales_Rhodobacteraceae_Rhodovulum_Rhodovulum-sp002079305
GB_GCA_011048875_Bacteria	Proteobacteria_Alphaproteobacteria_Rhodobacterales_Rhodobacteraceae_Rhodovulum_Rhodovulum-sp011048875
GB_GCA_016938875_Bacteria	Proteobacteria_Alphaproteobacteria_Rhodobacterales_Rhodobacteraceae_Rhodovulum_Rhodovulum-sp016938875
RS_GCF_900142935_Bacteria	Proteobacteria_Alphaproteobacteria_Rhodobacterales_Rhodobacteraceae_Rhodovulum_Rhodovulum-sp900142935
RS_GCF_004339675_Bacteria	Proteobacteria_Alphaproteobacteria_Rhodobacterales_Rhodobacteraceae_Rhodovulum_Rhodovulum-steppense
RS_GCF_001633165_Bacteria	Proteobacteria_Alphaproteobacteria_Rhodobacterales_Rhodobacteraceae_Rhodovulum_Rhodovulum-sulfidophilum
RS_GCF_004365965_Bacteria	Proteobacteria_Alphaproteobacteria_Rhodobacterales_Rhodobacteraceae_Rhodovulum_Rhodovulum-visakhapatnamense
RS_GCF_000590925_Bacteria	Proteobacteria_Alphaproteobacteria_Rhodobacterales_Rhodobacteraceae_Roseicyclus_Roseicyclus-elongatus
RS_GCF_003148775_Bacteria	Proteobacteria_Alphaproteobacteria_Rhodobacterales_Rhodobacteraceae_Roseicyclus_Roseicyclus-mahoneyensis
GB_GCA_001314805_Bacteria	Proteobacteria_Alphaproteobacteria_Rhodobacterales_Rhodobacteraceae_Roseicyclus_Roseicyclus-sp001314805
GB_GCA_019195455_Bacteria	Proteobacteria_Alphaproteobacteria_Rhodobacterales_Rhodobacteraceae_Roseicyclus_Roseicyclus-sp001650845
RS_GCF_012395815_Bacteria	Proteobacteria_Alphaproteobacteria_Rhodobacterales_Rhodobacteraceae_Roseicyclus_Roseicyclus-sp012395815
GB_GCA_015689645_Bacteria	Proteobacteria_Alphaproteobacteria_Rhodobacterales_Rhodobacteraceae_Roseicyclus_Roseicyclus-sp015689645
GB_GCA_015689735_Bacteria	Proteobacteria_Alphaproteobacteria_Rhodobacterales_Rhodobacteraceae_Roseicyclus_Roseicyclus-sp015689735
GB_GCA_015689745_Bacteria	Proteobacteria_Alphaproteobacteria_Rhodobacterales_Rhodobacteraceae_Roseicyclus_Roseicyclus-sp015689745
GB_GCA_018401055_Bacteria	Proteobacteria_Alphaproteobacteria_Rhodobacterales_Rhodobacteraceae_Roseicyclus_Roseicyclus-sp018401055
GB_GCA_018402035_Bacteria	Proteobacteria_Alphaproteobacteria_Rhodobacterales_Rhodobacteraceae_Roseicyclus_Roseicyclus-sp018402035
RS_GCF_004366635_Bacteria	Proteobacteria_Alphaproteobacteria_Rhodobacterales_Rhodobacteraceae_Roseinatronobacter_Roseinatronobacter-bogoriensis
RS_GCF_001517585_Bacteria	Proteobacteria_Alphaproteobacteria_Rhodobacterales_Rhodobacteraceae_Roseinatronobacter_Roseinatronobacter-calidilacus
RS_GCF_900499075_Bacteria	Proteobacteria_Alphaproteobacteria_Rhodobacterales_Rhodobacteraceae_Roseinatronobacter_Roseinatronobacter-ekhonensis
RS_GCF_006716865_Bacteria	Proteobacteria_Alphaproteobacteria_Rhodobacterales_Rhodobacteraceae_Roseinatronobacter_Roseinatronobacter-monicus
GB_GCA_007118445_Bacteria	Proteobacteria_Alphaproteobacteria_Rhodobacterales_Rhodobacteraceae_Roseinatronobacter_Roseinatronobacter-sp007118445
GB_GCA_016937725_Bacteria	Proteobacteria_Alphaproteobacteria_Rhodobacterales_Rhodobacteraceae_Roseinatronobacter_Roseinatronobacter-sp016937725
RS_GCF_001870675_Bacteria	Proteobacteria_Alphaproteobacteria_Rhodobacterales_Rhodobacteraceae_Roseinatronobacter_Roseinatronobacter-thiooxidans
RS_GCF_001884735_Bacteria	Proteobacteria_Alphaproteobacteria_Rhodobacterales_Rhodobacteraceae_Roseinatronobacter_Roseinatronobacter-thiooxidans_A
RS_GCF_000521865_Bacteria	Proteobacteria_Alphaproteobacteria_Rhodobacterales_Rhodobacteraceae_Roseivivax_Roseivivax-isoporae
RS_GCF_900172265_Bacteria	Proteobacteria_Alphaproteobacteria_Rhodobacterales_Rhodobacteraceae_Roseivivax_Roseivivax-jejudonensis
RS_GCF_900109705_Bacteria	Proteobacteria_Alphaproteobacteria_Rhodobacterales_Rhodobacteraceae_Roseivivax_Roseivivax-marinus
RS_GCF_009363255_Bacteria	Proteobacteria_Alphaproteobacteria_Rhodobacterales_Rhodobacteraceae_Roseivivax_Roseivivax-sp009363255
RS_GCF_009811755_Bacteria	Proteobacteria_Alphaproteobacteria_Rhodobacterales_Rhodobacteraceae_Roseobacter_Roseobacter-cerasinus
RS_GCF_000014045_Bacteria	Proteobacteria_Alphaproteobacteria_Rhodobacterales_Rhodobacteraceae_Roseobacter_Roseobacter-denitrificans
RS_GCF_000154785_Bacteria	Proteobacteria_Alphaproteobacteria_Rhodobacterales_Rhodobacteraceae_Roseobacter_Roseobacter-litoralis
RS_GCF_012932215_Bacteria	Proteobacteria_Alphaproteobacteria_Rhodobacterales_Rhodobacteraceae_Roseobacter_Roseobacter-ponti
RS_GCF_900172285_Bacteria	Proteobacteria_Alphaproteobacteria_Rhodobacterales_Rhodobacteraceae_Roseovarius_Roseovarius-aestuarii
RS_GCF_004761875_Bacteria	Proteobacteria_Alphaproteobacteria_Rhodobacterales_Rhodobacteraceae_Roseovarius_Roseovarius-aestuariivivens
RS_GCF_006125015_Bacteria	Proteobacteria_Alphaproteobacteria_Rhodobacterales_Rhodobacteraceae_Roseovarius_Roseovarius-arcticus
RS_GCF_001441615_Bacteria	Proteobacteria_Alphaproteobacteria_Rhodobacterales_Rhodobacteraceae_Roseovarius_Roseovarius-atlanticus
RS_GCF_009669325_Bacteria	Proteobacteria_Alphaproteobacteria_Rhodobacterales_Rhodobacteraceae_Roseovarius_Roseovarius-bejariae
RS_GCF_002917925_Bacteria	Proteobacteria_Alphaproteobacteria_Rhodobacterales_Rhodobacteraceae_Roseovarius_Roseovarius-confluentis
RS_GCF_009762325_Bacteria	Proteobacteria_Alphaproteobacteria_Rhodobacterales_Rhodobacteraceae_Roseovarius_Roseovarius-faecimaris
RS_GCF_900172365_Bacteria	Proteobacteria_Alphaproteobacteria_Rhodobacterales_Rhodobacteraceae_Roseovarius_Roseovarius-gaetbuli
RS_GCF_011601345_Bacteria	Proteobacteria_Alphaproteobacteria_Rhodobacterales_Rhodobacteraceae_Roseovarius_Roseovarius-gahaiensis
RS_GCF_900172255_Bacteria	Proteobacteria_Alphaproteobacteria_Rhodobacterales_Rhodobacteraceae_Roseovarius_Roseovarius-halotolerans
RS_GCF_008728195_Bacteria	Proteobacteria_Alphaproteobacteria_Rhodobacterales_Rhodobacteraceae_Roseovarius_Roseovarius-indicus
RS_GCF_900142765_Bacteria	Proteobacteria_Alphaproteobacteria_Rhodobacterales_Rhodobacteraceae_Roseovarius_Roseovarius-litoreus
RS_GCF_900172295_Bacteria	Proteobacteria_Alphaproteobacteria_Rhodobacterales_Rhodobacteraceae_Roseovarius_Roseovarius-litorisediminis
RS_GCF_900115165_Bacteria	Proteobacteria_Alphaproteobacteria_Rhodobacterales_Rhodobacteraceae_Roseovarius_Roseovarius-lutimaris
RS_GCF_900142625_Bacteria	Proteobacteria_Alphaproteobacteria_Rhodobacterales_Rhodobacteraceae_Roseovarius_Roseovarius-marisflavi
RS_GCF_000768555_Bacteria	Proteobacteria_Alphaproteobacteria_Rhodobacterales_Rhodobacteraceae_Roseovarius_Roseovarius-mucosus
RS_GCF_002080415_Bacteria	Proteobacteria_Alphaproteobacteria_Rhodobacterales_Rhodobacteraceae_Roseovarius_Roseovarius-mucosus_A
RS_GCF_900156535_Bacteria	Proteobacteria_Alphaproteobacteria_Rhodobacterales_Rhodobacteraceae_Roseovarius_Roseovarius-nanhaiticus
RS_GCF_002925845_Bacteria	Proteobacteria_Alphaproteobacteria_Rhodobacterales_Rhodobacteraceae_Roseovarius_Roseovarius-nitratireducens
RS_GCF_000152625_Bacteria	Proteobacteria_Alphaproteobacteria_Rhodobacterales_Rhodobacteraceae_Roseovarius_Roseovarius-nubinhibens
RS_GCF_900142665_Bacteria	Proteobacteria_Alphaproteobacteria_Rhodobacterales_Rhodobacteraceae_Roseovarius_Roseovarius-pacificus
RS_GCF_002834145_Bacteria	Proteobacteria_Alphaproteobacteria_Rhodobacterales_Rhodobacteraceae_Roseovarius_Roseovarius-salinarum
RS_GCF_003072125_Bacteria	Proteobacteria_Alphaproteobacteria_Rhodobacterales_Rhodobacteraceae_Roseovarius_Roseovarius-sediminicola
RS_GCF_000152845_Bacteria	Proteobacteria_Alphaproteobacteria_Rhodobacterales_Rhodobacteraceae_Roseovarius_Roseovarius-sp000152845
RS_GCF_000744325_Bacteria	Proteobacteria_Alphaproteobacteria_Rhodobacterales_Rhodobacteraceae_Roseovarius_Roseovarius-sp000744325
RS_GCF_002072155_Bacteria	Proteobacteria_Alphaproteobacteria_Rhodobacterales_Rhodobacteraceae_Roseovarius_Roseovarius-sp002072155
GB_GCA_002166865_Bacteria	Proteobacteria_Alphaproteobacteria_Rhodobacterales_Rhodobacteraceae_Roseovarius_Roseovarius-sp002166865
RS_GCF_003298505_Bacteria	Proteobacteria_Alphaproteobacteria_Rhodobacterales_Rhodobacteraceae_Roseovarius_Roseovarius-sp003298505
RS_GCF_009363655_Bacteria	Proteobacteria_Alphaproteobacteria_Rhodobacterales_Rhodobacteraceae_Roseovarius_Roseovarius-sp009363655
RS_GCF_009363715_Bacteria	Proteobacteria_Alphaproteobacteria_Rhodobacterales_Rhodobacteraceae_Roseovarius_Roseovarius-sp009363715
GB_GCA_014359765_Bacteria	Proteobacteria_Alphaproteobacteria_Rhodobacterales_Rhodobacteraceae_Roseovarius_Roseovarius-sp014359765
RS_GCF_018069895_Bacteria	Proteobacteria_Alphaproteobacteria_Rhodobacterales_Rhodobacteraceae_Roseovarius_Roseovarius-sp018069895
GB_GCA_900313005_Bacteria	Proteobacteria_Alphaproteobacteria_Rhodobacterales_Rhodobacteraceae_Roseovarius_Roseovarius-sp900313005
RS_GCF_900109855_Bacteria	Proteobacteria_Alphaproteobacteria_Rhodobacterales_Rhodobacteraceae_Roseovarius_Roseovarius-tolerans
RS_GCF_009904055_Bacteria	Proteobacteria_Alphaproteobacteria_Rhodobacterales_Rhodobacteraceae_Rubellimicrobium_Rubellimicrobium-sp009904055
RS_GCF_000442315_Bacteria	Proteobacteria_Alphaproteobacteria_Rhodobacterales_Rhodobacteraceae_Rubellimicrobium_Rubellimicrobium-thermophilum
RS_GCF_900107585_Bacteria	Proteobacteria_Alphaproteobacteria_Rhodobacterales_Rhodobacteraceae_Rubrimonas_Rubrimonas-cliftonensis
RS_GCF_900101475_Bacteria	Proteobacteria_Alphaproteobacteria_Rhodobacterales_Rhodobacteraceae_Ruegeria_B_Ruegeria_B-marina
RS_GCF_000011965_Bacteria	Proteobacteria_Alphaproteobacteria_Rhodobacterales_Rhodobacteraceae_Ruegeria_B_Ruegeria_B-pomeroyi
RS_GCF_010500245_Bacteria	Proteobacteria_Alphaproteobacteria_Rhodobacterales_Rhodobacteraceae_Ruegeria_B_Ruegeria_B-sp010500245
RS_GCF_900172225_Bacteria	Proteobacteria_Alphaproteobacteria_Rhodobacterales_Rhodobacteraceae_Ruegeria_E_Ruegeria_E-litorea
RS_GCF_900302455_Bacteria	Proteobacteria_Alphaproteobacteria_Rhodobacterales_Rhodobacteraceae_Ruegeria_E_Ruegeria_E-mediterranea
RS_GCF_017743935_Bacteria	Proteobacteria_Alphaproteobacteria_Rhodobacterales_Rhodobacteraceae_Ruegeria_E_Ruegeria_E-sp017743935
RS_GCF_900537075_Bacteria	Proteobacteria_Alphaproteobacteria_Rhodobacterales_Rhodobacteraceae_Ruegeria_E_Ruegeria_E-sp900537075
RS_GCF_013035425_Bacteria	Proteobacteria_Alphaproteobacteria_Rhodobacterales_Rhodobacteraceae_Ruegeria_Ruegeria-arenilitoris_A
RS_GCF_013030985_Bacteria	Proteobacteria_Alphaproteobacteria_Rhodobacterales_Rhodobacteraceae_Ruegeria_Ruegeria-arenilitoris_B
RS_GCF_001458195_Bacteria	Proteobacteria_Alphaproteobacteria_Rhodobacterales_Rhodobacteraceae_Ruegeria_Ruegeria-atlantica
RS_GCF_013032025_Bacteria	Proteobacteria_Alphaproteobacteria_Rhodobacterales_Rhodobacteraceae_Ruegeria_Ruegeria-atlantica_C
RS_GCF_900182615_Bacteria	Proteobacteria_Alphaproteobacteria_Rhodobacterales_Rhodobacteraceae_Ruegeria_Ruegeria-faecimaris
RS_GCF_900129345_Bacteria	Proteobacteria_Alphaproteobacteria_Rhodobacterales_Rhodobacteraceae_Ruegeria_Ruegeria-intermedia
RS_GCF_000161775_Bacteria	Proteobacteria_Alphaproteobacteria_Rhodobacterales_Rhodobacteraceae_Ruegeria_Ruegeria-lacuscaerulensis
RS_GCF_013033355_Bacteria	Proteobacteria_Alphaproteobacteria_Rhodobacterales_Rhodobacteraceae_Ruegeria_Ruegeria-lacuscaerulensis_A
RS_GCF_013031245_Bacteria	Proteobacteria_Alphaproteobacteria_Rhodobacterales_Rhodobacteraceae_Ruegeria_Ruegeria-lacuscaerulensis_C
RS_GCF_001507595_Bacteria	Proteobacteria_Alphaproteobacteria_Rhodobacterales_Rhodobacteraceae_Ruegeria_Ruegeria-marisrubri
RS_GCF_001507545_Bacteria	Proteobacteria_Alphaproteobacteria_Rhodobacterales_Rhodobacteraceae_Ruegeria_Ruegeria-profundi
RS_GCF_005938215_Bacteria	Proteobacteria_Alphaproteobacteria_Rhodobacterales_Rhodobacteraceae_Ruegeria_Ruegeria-sediminis
RS_GCF_003443535_Bacteria	Proteobacteria_Alphaproteobacteria_Rhodobacterales_Rhodobacteraceae_Ruegeria_Ruegeria-sp003443535
RS_GCF_009363615_Bacteria	Proteobacteria_Alphaproteobacteria_Rhodobacterales_Rhodobacteraceae_Ruegeria_Ruegeria-sp009363615
RS_GCF_013031405_Bacteria	Proteobacteria_Alphaproteobacteria_Rhodobacterales_Rhodobacteraceae_Ruegeria_Ruegeria-sp013031405
RS_GCF_013111185_Bacteria	Proteobacteria_Alphaproteobacteria_Rhodobacterales_Rhodobacteraceae_Ruegeria_Ruegeria-sp013111185
RS_GCF_017872555_Bacteria	Proteobacteria_Alphaproteobacteria_Rhodobacterales_Rhodobacteraceae_Ruegeria_Ruegeria-sp017872555
RS_GCF_900313035_Bacteria	Proteobacteria_Alphaproteobacteria_Rhodobacterales_Rhodobacteraceae_Ruegeria_Ruegeria-sp900313035
RS_GCF_014196795_Bacteria	Proteobacteria_Alphaproteobacteria_Rhodobacterales_Rhodobacteraceae_Sagittula_Sagittula-marina
RS_GCF_002814095_Bacteria	Proteobacteria_Alphaproteobacteria_Rhodobacterales_Rhodobacteraceae_Sagittula_Sagittula-sp002814095
RS_GCF_017813235_Bacteria	Proteobacteria_Alphaproteobacteria_Rhodobacterales_Rhodobacteraceae_Sagittula_Sagittula-sp017813235
RS_GCF_000169415_Bacteria	Proteobacteria_Alphaproteobacteria_Rhodobacterales_Rhodobacteraceae_Sagittula_Sagittula-stellata
RS_GCF_003129565_Bacteria	Proteobacteria_Alphaproteobacteria_Rhodobacterales_Rhodobacteraceae_Salibaculum_Salibaculum-griseiflavum
RS_GCF_002094885_Bacteria	Proteobacteria_Alphaproteobacteria_Rhodobacterales_Rhodobacteraceae_Salibaculum_Salibaculum-halophilum
GB_GCA_001314655_Bacteria	Proteobacteria_Alphaproteobacteria_Rhodobacterales_Rhodobacteraceae_Salibaculum_Salibaculum-sp001314655
GB_GCA_009908505_Bacteria	Proteobacteria_Alphaproteobacteria_Rhodobacterales_Rhodobacteraceae_Salibaculum_Salibaculum-sp009908505
RS_GCF_900110425_Bacteria	Proteobacteria_Alphaproteobacteria_Rhodobacterales_Rhodobacteraceae_Salinihabitans_Salinihabitans-flavidus
RS_GCF_001975705_Bacteria	Proteobacteria_Alphaproteobacteria_Rhodobacterales_Rhodobacteraceae_Salipiger_Salipiger-abyssi
RS_GCF_017311415_Bacteria	Proteobacteria_Alphaproteobacteria_Rhodobacterales_Rhodobacteraceae_Salipiger_Salipiger-abyssi_A
RS_GCF_003259905_Bacteria	Proteobacteria_Alphaproteobacteria_Rhodobacterales_Rhodobacteraceae_Salipiger_Salipiger-aestuarii
RS_GCF_000153725_Bacteria	Proteobacteria_Alphaproteobacteria_Rhodobacterales_Rhodobacteraceae_Salipiger_Salipiger-bermudensis
RS_GCF_900100085_Bacteria	Proteobacteria_Alphaproteobacteria_Rhodobacterales_Rhodobacteraceae_Salipiger_Salipiger-marinus
RS_GCF_000442255_Bacteria	Proteobacteria_Alphaproteobacteria_Rhodobacterales_Rhodobacteraceae_Salipiger_Salipiger-mucosus
RS_GCF_900116195_Bacteria	Proteobacteria_Alphaproteobacteria_Rhodobacterales_Rhodobacteraceae_Salipiger_Salipiger-pacificus
RS_GCF_003111685_Bacteria	Proteobacteria_Alphaproteobacteria_Rhodobacterales_Rhodobacteraceae_Salipiger_Salipiger-pacificus_A
RS_GCF_015223355_Bacteria	Proteobacteria_Alphaproteobacteria_Rhodobacterales_Rhodobacteraceae_Salipiger_Salipiger-pacificus_B
RS_GCF_001969385_Bacteria	Proteobacteria_Alphaproteobacteria_Rhodobacterales_Rhodobacteraceae_Salipiger_Salipiger-profundus
RS_GCF_001687105_Bacteria	Proteobacteria_Alphaproteobacteria_Rhodobacterales_Rhodobacteraceae_Salipiger_Salipiger-sp001687105
RS_GCF_900102075_Bacteria	Proteobacteria_Alphaproteobacteria_Rhodobacterales_Rhodobacteraceae_Salipiger_Salipiger-thiooxidans
RS_GCF_000473225_Bacteria	Proteobacteria_Alphaproteobacteria_Rhodobacterales_Rhodobacteraceae_Sedimentitalea_Sedimentitalea-nanhaiensis
RS_GCF_016428585_Bacteria	Proteobacteria_Alphaproteobacteria_Rhodobacterales_Rhodobacteraceae_Sedimentitalea_Sedimentitalea-sp016428585
GB_GCA_016521575_Bacteria	Proteobacteria_Alphaproteobacteria_Rhodobacterales_Rhodobacteraceae_Sedimentitalea_Sedimentitalea-sp016521575
RS_GCF_000423645_Bacteria	Proteobacteria_Alphaproteobacteria_Rhodobacterales_Rhodobacteraceae_Sediminimonas_Sediminimonas-qiaohouensis
RS_GCF_014656415_Bacteria	Proteobacteria_Alphaproteobacteria_Rhodobacterales_Rhodobacteraceae_Seohaeicola_Seohaeicola-zhoushanensis
RS_GCF_016888515_Bacteria	Proteobacteria_Alphaproteobacteria_Rhodobacterales_Rhodobacteraceae_Shimia_A_Shimia_A-biformata
RS_GCF_900114635_Bacteria	Proteobacteria_Alphaproteobacteria_Rhodobacterales_Rhodobacteraceae_Shimia_Shimia-aestuarii
RS_GCF_900142085_Bacteria	Proteobacteria_Alphaproteobacteria_Rhodobacterales_Rhodobacteraceae_Shimia_Shimia-gijangensis
RS_GCF_005518135_Bacteria	Proteobacteria_Alphaproteobacteria_Rhodobacterales_Rhodobacteraceae_Shimia_Shimia-litoralis
RS_GCF_003990645_Bacteria	Proteobacteria_Alphaproteobacteria_Rhodobacterales_Rhodobacteraceae_Shimia_Shimia-sediminis
RS_GCF_001292625_Bacteria	Proteobacteria_Alphaproteobacteria_Rhodobacterales_Rhodobacteraceae_Shimia_Shimia-sp001292625
GB_GCA_014872815_Bacteria	Proteobacteria_Alphaproteobacteria_Rhodobacterales_Rhodobacteraceae_Shimia_Shimia-sp014872815
RS_GCF_016019955_Bacteria	Proteobacteria_Alphaproteobacteria_Rhodobacterales_Rhodobacteraceae_Shimia_Shimia-sp016019955
GB_GCA_018223085_Bacteria	Proteobacteria_Alphaproteobacteria_Rhodobacterales_Rhodobacteraceae_Shimia_Shimia-sp018223085
GB_GCA_900143615_Bacteria	Proteobacteria_Alphaproteobacteria_Rhodobacterales_Rhodobacteraceae_Shimia_Shimia-sp900143615
RS_GCF_001458215_Bacteria	Proteobacteria_Alphaproteobacteria_Rhodobacterales_Rhodobacteraceae_Shimia_Shimia-thalassica
RS_GCF_003148765_Bacteria	Proteobacteria_Alphaproteobacteria_Rhodobacterales_Rhodobacteraceae_Silicimonas_Silicimonas-algicola
RS_GCF_005887615_Bacteria	Proteobacteria_Alphaproteobacteria_Rhodobacterales_Rhodobacteraceae_Sulfitobacter_E_Sulfitobacter_E-sabulilitoris
RS_GCF_900112755_Bacteria	Proteobacteria_Alphaproteobacteria_Rhodobacterales_Rhodobacteraceae_Sulfitobacter_Sulfitobacter-brevis
RS_GCF_900102535_Bacteria	Proteobacteria_Alphaproteobacteria_Rhodobacterales_Rhodobacteraceae_Sulfitobacter_Sulfitobacter-delicatus
RS_GCF_000622405_Bacteria	Proteobacteria_Alphaproteobacteria_Rhodobacterales_Rhodobacteraceae_Sulfitobacter_Sulfitobacter-donghicola
RS_GCF_900113435_Bacteria	Proteobacteria_Alphaproteobacteria_Rhodobacterales_Rhodobacteraceae_Sulfitobacter_Sulfitobacter-dubius
RS_GCF_000622325_Bacteria	Proteobacteria_Alphaproteobacteria_Rhodobacterales_Rhodobacteraceae_Sulfitobacter_Sulfitobacter-geojensis
RS_GCF_000172095_Bacteria	Proteobacteria_Alphaproteobacteria_Rhodobacterales_Rhodobacteraceae_Sulfitobacter_Sulfitobacter-indolifex
RS_GCF_900103185_Bacteria	Proteobacteria_Alphaproteobacteria_Rhodobacterales_Rhodobacteraceae_Sulfitobacter_Sulfitobacter-litoralis
RS_GCF_900116285_Bacteria	Proteobacteria_Alphaproteobacteria_Rhodobacterales_Rhodobacteraceae_Sulfitobacter_Sulfitobacter-marinus
RS_GCF_013346665_Bacteria	Proteobacteria_Alphaproteobacteria_Rhodobacterales_Rhodobacteraceae_Sulfitobacter_Sulfitobacter-maritimus
RS_GCF_003054325_Bacteria	Proteobacteria_Alphaproteobacteria_Rhodobacterales_Rhodobacteraceae_Sulfitobacter_Sulfitobacter-mediterraneus
RS_GCF_016801775_Bacteria	Proteobacteria_Alphaproteobacteria_Rhodobacterales_Rhodobacteraceae_Sulfitobacter_Sulfitobacter-mediterraneus_A
RS_GCF_000622365_Bacteria	Proteobacteria_Alphaproteobacteria_Rhodobacterales_Rhodobacteraceae_Sulfitobacter_Sulfitobacter-noctilucae
RS_GCF_000622385_Bacteria	Proteobacteria_Alphaproteobacteria_Rhodobacterales_Rhodobacteraceae_Sulfitobacter_Sulfitobacter-noctilucicola
RS_GCF_900106935_Bacteria	Proteobacteria_Alphaproteobacteria_Rhodobacterales_Rhodobacteraceae_Sulfitobacter_Sulfitobacter-pontiacus
RS_GCF_010667575_Bacteria	Proteobacteria_Alphaproteobacteria_Rhodobacterales_Rhodobacteraceae_Sulfitobacter_Sulfitobacter-sediminilitoris
RS_GCF_000156335_Bacteria	Proteobacteria_Alphaproteobacteria_Rhodobacterales_Rhodobacteraceae_Sulfitobacter_Sulfitobacter-sp000156335
RS_GCF_003611275_Bacteria	Proteobacteria_Alphaproteobacteria_Rhodobacterales_Rhodobacteraceae_Sulfitobacter_Sulfitobacter-sp001634775
RS_GCF_017743885_Bacteria	Proteobacteria_Alphaproteobacteria_Rhodobacterales_Rhodobacteraceae_Sulfitobacter_Sulfitobacter-sp001635605
RS_GCF_001650875_Bacteria	Proteobacteria_Alphaproteobacteria_Rhodobacterales_Rhodobacteraceae_Sulfitobacter_Sulfitobacter-sp001650875
GB_GCA_002703405_Bacteria	Proteobacteria_Alphaproteobacteria_Rhodobacterales_Rhodobacteraceae_Sulfitobacter_Sulfitobacter-sp002703405
GB_GCA_002731875_Bacteria	Proteobacteria_Alphaproteobacteria_Rhodobacterales_Rhodobacteraceae_Sulfitobacter_Sulfitobacter-sp002731875
RS_GCF_003335585_Bacteria	Proteobacteria_Alphaproteobacteria_Rhodobacterales_Rhodobacteraceae_Sulfitobacter_Sulfitobacter-sp003335585
RS_GCF_003352065_Bacteria	Proteobacteria_Alphaproteobacteria_Rhodobacterales_Rhodobacteraceae_Sulfitobacter_Sulfitobacter-sp003352065
RS_GCF_003352085_Bacteria	Proteobacteria_Alphaproteobacteria_Rhodobacterales_Rhodobacteraceae_Sulfitobacter_Sulfitobacter-sp003352085
RS_GCF_006064855_Bacteria	Proteobacteria_Alphaproteobacteria_Rhodobacterales_Rhodobacteraceae_Sulfitobacter_Sulfitobacter-sp006064855
GB_GCA_011050655_Bacteria	Proteobacteria_Alphaproteobacteria_Rhodobacterales_Rhodobacteraceae_Sulfitobacter_Sulfitobacter-sp011050655
GB_GCA_013002405_Bacteria	Proteobacteria_Alphaproteobacteria_Rhodobacterales_Rhodobacteraceae_Sulfitobacter_Sulfitobacter-sp013002405
GB_GCA_017854855_Bacteria	Proteobacteria_Alphaproteobacteria_Rhodobacterales_Rhodobacteraceae_Sulfitobacter_Sulfitobacter-sp017854855
RS_GCF_014196805_Bacteria	Proteobacteria_Alphaproteobacteria_Rhodobacterales_Rhodobacteraceae_Sulfitobacter_Sulfitobacter-undariae
RS_GCF_008065155_Bacteria	Proteobacteria_Alphaproteobacteria_Rhodobacterales_Rhodobacteraceae_SW4_SW4-sp002732825
GB_GCA_003249215_Bacteria	Proteobacteria_Alphaproteobacteria_Rhodobacterales_Rhodobacteraceae_SZUA-611_SZUA-611-sp003249215
RS_GCF_002900975_Bacteria	Proteobacteria_Alphaproteobacteria_Rhodobacterales_Rhodobacteraceae_Tabrizicola_Tabrizicola-aquatica
RS_GCF_008271465_Bacteria	Proteobacteria_Alphaproteobacteria_Rhodobacterales_Rhodobacteraceae_Tabrizicola_Tabrizicola-flagellata
RS_GCF_015999335_Bacteria	Proteobacteria_Alphaproteobacteria_Rhodobacterales_Rhodobacteraceae_Tabrizicola_Tabrizicola-soli
RS_GCF_004762095_Bacteria	Proteobacteria_Alphaproteobacteria_Rhodobacterales_Rhodobacteraceae_Tabrizicola_Tabrizicola-sp004762095
RS_GCF_011174775_Bacteria	Proteobacteria_Alphaproteobacteria_Rhodobacterales_Rhodobacteraceae_Tabrizicola_Tabrizicola-sp011174775
GB_GCA_013821825_Bacteria	Proteobacteria_Alphaproteobacteria_Rhodobacterales_Rhodobacteraceae_Tabrizicola_Tabrizicola-sp013821825
RS_GCF_003574395_Bacteria	Proteobacteria_Alphaproteobacteria_Rhodobacterales_Rhodobacteraceae_Tabrizicola_Tabrizicola-thermarum
RS_GCF_014651375_Bacteria	Proteobacteria_Alphaproteobacteria_Rhodobacterales_Rhodobacteraceae_Tateyamaria_Tateyamaria-omphalii
RS_GCF_000814025_Bacteria	Proteobacteria_Alphaproteobacteria_Rhodobacterales_Rhodobacteraceae_Tateyamaria_Tateyamaria-sp000814025
RS_GCF_007995245_Bacteria	Proteobacteria_Alphaproteobacteria_Rhodobacterales_Rhodobacteraceae_Tateyamaria_Tateyamaria-sp007995245
RS_GCF_001458315_Bacteria	Proteobacteria_Alphaproteobacteria_Rhodobacterales_Rhodobacteraceae_Thalassobacter_Thalassobacter-stenotrophicus
RS_GCF_018219815_Bacteria	Proteobacteria_Alphaproteobacteria_Rhodobacterales_Rhodobacteraceae_Thalassobius_Thalassobius-aquimarinus
RS_GCF_001458355_Bacteria	Proteobacteria_Alphaproteobacteria_Rhodobacterales_Rhodobacteraceae_Thalassobius_Thalassobius-gelatinovorus
RS_GCF_900182725_Bacteria	Proteobacteria_Alphaproteobacteria_Rhodobacterales_Rhodobacteraceae_Thalassobius_Thalassobius-litoralis
RS_GCF_009857745_Bacteria	Proteobacteria_Alphaproteobacteria_Rhodobacterales_Rhodobacteraceae_Thalassobius_Thalassobius-mangrovi
GB_GCA_017792425_Bacteria	Proteobacteria_Alphaproteobacteria_Rhodobacterales_Rhodobacteraceae_Thalassobius_Thalassobius-sp017792425
RS_GCF_004799325_Bacteria	Proteobacteria_Alphaproteobacteria_Rhodobacterales_Rhodobacteraceae_Thalassobius_Thalassobius-vesicularis
RS_GCF_002358085_Bacteria	Proteobacteria_Alphaproteobacteria_Rhodobacterales_Rhodobacteraceae_Thioclava_Thioclava-arenosa
RS_GCF_000737065_Bacteria	Proteobacteria_Alphaproteobacteria_Rhodobacterales_Rhodobacteraceae_Thioclava_Thioclava-atlantica
RS_GCF_002085925_Bacteria	Proteobacteria_Alphaproteobacteria_Rhodobacterales_Rhodobacteraceae_Thioclava_Thioclava-electrotropha
RS_GCF_000714545_Bacteria	Proteobacteria_Alphaproteobacteria_Rhodobacterales_Rhodobacteraceae_Thioclava_Thioclava-indica
RS_GCF_002020135_Bacteria	Proteobacteria_Alphaproteobacteria_Rhodobacterales_Rhodobacteraceae_Thioclava_Thioclava-marina
RS_GCF_001940525_Bacteria	Proteobacteria_Alphaproteobacteria_Rhodobacterales_Rhodobacteraceae_Thioclava_Thioclava-nitratireducens
RS_GCF_000714535_Bacteria	Proteobacteria_Alphaproteobacteria_Rhodobacterales_Rhodobacteraceae_Thioclava_Thioclava-pacifica
RS_GCF_002563775_Bacteria	Proteobacteria_Alphaproteobacteria_Rhodobacterales_Rhodobacteraceae_Thioclava_Thioclava-sp002563775
RS_GCF_009296265_Bacteria	Proteobacteria_Alphaproteobacteria_Rhodobacterales_Rhodobacteraceae_Thioclava_Thioclava-sp009296265
RS_GCF_900176475_Bacteria	Proteobacteria_Alphaproteobacteria_Rhodobacterales_Rhodobacteraceae_Tropicibacter_Tropicibacter-naphthalenivorans
RS_GCF_003667315_Bacteria	Proteobacteria_Alphaproteobacteria_Rhodobacterales_Rhodobacteraceae_Tropicibacter_Tropicibacter-sp003667315
RS_GCF_900112335_Bacteria	Proteobacteria_Alphaproteobacteria_Rhodobacterales_Rhodobacteraceae_Tropicimonas_Tropicimonas-isoalkanivorans
RS_GCF_900099935_Bacteria	Proteobacteria_Alphaproteobacteria_Rhodobacterales_Rhodobacteraceae_Tropicimonas_Tropicimonas-lutimaris
RS_GCF_001509585_Bacteria	Proteobacteria_Alphaproteobacteria_Rhodobacterales_Rhodobacteraceae_Tropicimonas_Tropicimonas-marinistellae
RS_GCF_001558155_Bacteria	Proteobacteria_Alphaproteobacteria_Rhodobacterales_Rhodobacteraceae_Tropicimonas_Tropicimonas-sabulilitoris
RS_GCF_900188335_Bacteria	Proteobacteria_Alphaproteobacteria_Rhodobacterales_Rhodobacteraceae_Tropicimonas_Tropicimonas-sediminicola
RS_GCF_003390845_Bacteria	Proteobacteria_Alphaproteobacteria_Rhodobacterales_Rhodobacteraceae_Tropicimonas_Tropicimonas-sp003390845
RS_GCF_004146235_Bacteria	Proteobacteria_Alphaproteobacteria_Rhodobacterales_Rhodobacteraceae_Tropicimonas_Tropicimonas-sp004146235
GB_GCA_002366795_Bacteria	Proteobacteria_Alphaproteobacteria_Rhodobacterales_Rhodobacteraceae_UBA3069_UBA3069-sp002366795
GB_GCA_002366645_Bacteria	Proteobacteria_Alphaproteobacteria_Rhodobacterales_Rhodobacteraceae_UBA3077_UBA3077-sp002366645
GB_GCA_002746395_Bacteria	Proteobacteria_Alphaproteobacteria_Rhodobacterales_Rhodobacteraceae_UBA3077_UBA3077-sp002746395
GB_GCA_015485375_Bacteria	Proteobacteria_Alphaproteobacteria_Rhodobacterales_Rhodobacteraceae_UBA3077_UBA3077-sp015485375
GB_GCA_016765235_Bacteria	Proteobacteria_Alphaproteobacteria_Rhodobacterales_Rhodobacteraceae_UBA3077_UBA3077-sp016765235
GB_GCA_013151535_Bacteria	Proteobacteria_Alphaproteobacteria_Rhodobacterales_Rhodobacteraceae_UBA5972_UBA5972-sp013151535
GB_GCA_015487165_Bacteria	Proteobacteria_Alphaproteobacteria_Rhodobacterales_Rhodobacteraceae_UBA5972_UBA5972-sp015487165
GB_GCA_002452815_Bacteria	Proteobacteria_Alphaproteobacteria_Rhodobacterales_Rhodobacteraceae_UBA6796_UBA6796-sp002452815
GB_GCA_003512825_Bacteria	Proteobacteria_Alphaproteobacteria_Rhodobacterales_Rhodobacteraceae_UBA9554_UBA9554-sp003512825
RS_GCF_900142295_Bacteria	Proteobacteria_Alphaproteobacteria_Rhodobacterales_Rhodobacteraceae_Vannielia_Vannielia-litorea
RS_GCF_018424695_Bacteria	Proteobacteria_Alphaproteobacteria_Rhodobacterales_Rhodobacteraceae_Vannielia_Vannielia-litorea_A
RS_GCF_006351965_Bacteria	Proteobacteria_Alphaproteobacteria_Rhodobacterales_Rhodobacteraceae_Vannielia_Vannielia-sp006351965
GB_GCA_017792405_Bacteria	Proteobacteria_Alphaproteobacteria_Rhodobacterales_Rhodobacteraceae_Vannielia_Vannielia-sp017792405
RS_GCF_004054105_Bacteria	Proteobacteria_Alphaproteobacteria_Rhodobacterales_Rhodobacteraceae_Wagnerdoeblera_Wagnerdoeblera-intermedia
RS_GCF_900156815_Bacteria	Proteobacteria_Alphaproteobacteria_Rhodobacterales_Rhodobacteraceae_Wagnerdoeblera_Wagnerdoeblera-megaterium
RS_GCF_000429765_Bacteria	Proteobacteria_Alphaproteobacteria_Rhodobacterales_Rhodobacteraceae_Wagnerdoeblera_Wagnerdoeblera-nectariphila
GB_GCA_015487815_Bacteria	Proteobacteria_Alphaproteobacteria_Rhodobacterales_Rhodobacteraceae_WFPA01_WFPA01-sp015487815
GB_GCA_015491895_Bacteria	Proteobacteria_Alphaproteobacteria_Rhodobacterales_Rhodobacteraceae_WFVA01_WFVA01-sp015491895
GB_GCA_014872875_Bacteria	Proteobacteria_Alphaproteobacteria_Rhodobacterales_Rhodobacteraceae_WKFI01_WKFI01-sp014872875
RS_GCF_007995215_Bacteria	Proteobacteria_Alphaproteobacteria_Rhodobacterales_Rhodobacteraceae_WX04_WX04-sp007995215
RS_GCF_003058085_Bacteria	Proteobacteria_Alphaproteobacteria_Rhodobacterales_Rhodobacteraceae_Yoonia_Yoonia-sediminilitoris
RS_GCF_001419985_Bacteria	Proteobacteria_Alphaproteobacteria_Rhodobacterales_Rhodobacteraceae_Yoonia_Yoonia-sp001419985
GB_GCA_002378665_Bacteria	Proteobacteria_Alphaproteobacteria_Rhodobacterales_Rhodobacteraceae_Yoonia_Yoonia-sp002378665
RS_GCF_003201935_Bacteria	Proteobacteria_Alphaproteobacteria_Rhodobacterales_Rhodobacteraceae_Yoonia_Yoonia-sp003201935
GB_GCA_014859355_Bacteria	Proteobacteria_Alphaproteobacteria_Rhodobacterales_Rhodobacteraceae_Yoonia_Yoonia-sp014859355
GB_GCA_017854565_Bacteria	Proteobacteria_Alphaproteobacteria_Rhodobacterales_Rhodobacteraceae_Yoonia_Yoonia-sp017854565
GB_GCA_905182645_Bacteria	Proteobacteria_Alphaproteobacteria_Rhodobacterales_Rhodobacteraceae_Yoonia_Yoonia-sp905182645
GB_GCA_002325375_Bacteria	Proteobacteria_Alphaproteobacteria_Rhodospirillales_Casp-alpha2_UBA1479_UBA1479-sp002325375
GB_GCA_002433335_Bacteria	Proteobacteria_Alphaproteobacteria_Rhodospirillales_Casp-alpha2_UBA1479_UBA1479-sp002433335
GB_GCA_002706405_Bacteria	Proteobacteria_Alphaproteobacteria_Rhodospirillales_Casp-alpha2_UBA1479_UBA1479-sp002706405
GB_GCA_017640505_Bacteria	Proteobacteria_Alphaproteobacteria_Rhodospirillales_Casp-alpha2_UBA4479_UBA4479-sp017640505
GB_GCA_017644185_Bacteria	Proteobacteria_Alphaproteobacteria_Rhodospirillales_Casp-alpha2_UBA4479_UBA4479-sp017644185
RS_GCF_003403095_Bacteria	Proteobacteria_Alphaproteobacteria_Rhodospirillales_Thalassospiraceae_Thalassospira_Thalassospira-indica
RS_GCF_000300275_Bacteria	Proteobacteria_Alphaproteobacteria_Rhodospirillales_Thalassospiraceae_Thalassospira_Thalassospira-profundimaris
RS_GCF_000948415_Bacteria	Proteobacteria_Alphaproteobacteria_Rhodospirillales_Thalassospiraceae_Thalassospira_Thalassospira-sp000948415
GB_GCA_002709775_Bacteria	Proteobacteria_Alphaproteobacteria_Rhodospirillales_Thalassospiraceae_Thalassospira_Thalassospira-sp002709775
RS_GCF_011806525_Bacteria	Proteobacteria_Alphaproteobacteria_Rhodospirillales_Thalassospiraceae_Thalassospira_Thalassospira-sp011806525
RS_GCF_017922435_Bacteria	Proteobacteria_Alphaproteobacteria_Rhodospirillales_Thalassospiraceae_Thalassospira_Thalassospira-sp017922435
RS_GCF_001662875_Bacteria	Proteobacteria_Alphaproteobacteria_Rhodospirillales_Thalassospiraceae_Thalassospira_Thalassospira-tepidiphila
GB_GCA_009694185_Bacteria	Proteobacteria_Alphaproteobacteria_SHVR01_SHVR01_SHVR01_SHVR01-sp009694185
GB_GCA_016869645_Bacteria	Proteobacteria_Alphaproteobacteria_SHVW01_SHVW01_SHVW01_SHVW01-sp016869645
GB_GCA_002238645_Bacteria	Proteobacteria_Alphaproteobacteria_Thalassobaculales_Thalassobaculaceae_Bin52_Bin52-sp002238645
RS_GCF_000426505_Bacteria	Proteobacteria_Alphaproteobacteria_Thalassobaculales_Thalassobaculaceae_Nisaea_Nisaea-denitrificans
RS_GCF_014904795_Bacteria	Proteobacteria_Alphaproteobacteria_Thalassobaculales_Thalassobaculaceae_Nisaea_Nisaea-nitritireducens
RS_GCF_014904705_Bacteria	Proteobacteria_Alphaproteobacteria_Thalassobaculales_Thalassobaculaceae_Nisaea_Nisaea-sp014904705
GB_GCA_017640745_Bacteria	Proteobacteria_Alphaproteobacteria_Thalassobaculales_Thalassobaculaceae_Nisaea_Nisaea-sp017640745
RS_GCF_014652915_Bacteria	Proteobacteria_Alphaproteobacteria_Thalassobaculales_Thalassobaculaceae_Thalassobaculum_A_Thalassobaculum_A-fulvum
GB_GCA_018401495_Bacteria	Proteobacteria_Alphaproteobacteria_Thalassobaculales_Thalassobaculaceae_Thalassobaculum_A_Thalassobaculum_A-sp018401495
GB_GCA_905480575_Bacteria	Proteobacteria_Alphaproteobacteria_UBA7985_UBA7985_CAJQQZ01_CAJQQZ01-sp905480575
GB_GCA_012926505_Bacteria	Proteobacteria_Alphaproteobacteria_UBA8366_GCA-2696645_GCA-2696645_GCA-2696645-sp012926505
RS_GCF_004005845_Bacteria	Proteobacteria_Alphaproteobacteria_UBA8366_GCA-2696645_Hwanghaeella_Hwanghaeella-grinnelliae
GB_GCA_001295775_Bacteria	Proteobacteria_Gammaproteobacteria_Burkholderiales_Burkholderiaceae_AAP99_AAP99-sp001295775
RS_GCF_014489595_Bacteria	Proteobacteria_Gammaproteobacteria_Burkholderiales_Burkholderiaceae_Acidovorax_F_Acidovorax_F-monticola
GB_GCA_000272025_Bacteria	Proteobacteria_Gammaproteobacteria_Burkholderiales_Burkholderiaceae_AKCV01_AKCV01-sp000272025
GB_GCA_001770815_Bacteria	Proteobacteria_Gammaproteobacteria_Burkholderiales_Burkholderiaceae_Aquabacterium_A_Aquabacterium_A-sp001770815
GB_GCA_017992055_Bacteria	Proteobacteria_Gammaproteobacteria_Burkholderiales_Burkholderiaceae_Aquabacterium_A_Aquabacterium_A-sp017992055
GB_GCA_011390055_Bacteria	Proteobacteria_Gammaproteobacteria_Burkholderiales_Burkholderiaceae_CADEEN01_CADEEN01-sp011390055
GB_GCA_014377155_Bacteria	Proteobacteria_Gammaproteobacteria_Burkholderiales_Burkholderiaceae_CAILRJ01_CAILRJ01-sp014377155
GB_GCA_016710525_Bacteria	Proteobacteria_Gammaproteobacteria_Burkholderiales_Burkholderiaceae_CAIZPE01_CAIZPE01-sp016710525
GB_GCA_903934295_Bacteria	Proteobacteria_Gammaproteobacteria_Burkholderiales_Burkholderiaceae_CAIZPE01_CAIZPE01-sp903934295
GB_GCA_903934795_Bacteria	Proteobacteria_Gammaproteobacteria_Burkholderiales_Burkholderiaceae_CAIZPE01_CAIZPE01-sp903934795
RS_GCF_000381125_Bacteria	Proteobacteria_Gammaproteobacteria_Burkholderiales_Burkholderiaceae_Caldimonas_Caldimonas-manganoxidans
RS_GCF_003574675_Bacteria	Proteobacteria_Gammaproteobacteria_Burkholderiales_Burkholderiaceae_Calidifontimicrobium_Calidifontimicrobium-sediminis
RS_GCF_014207855_Bacteria	Proteobacteria_Gammaproteobacteria_Burkholderiales_Burkholderiaceae_Comamonas_Comamonas-odontotermitis
GB_GCA_018384835_Bacteria	Proteobacteria_Gammaproteobacteria_Burkholderiales_Burkholderiaceae_Comamonas_Comamonas-sp018384835
GB_GCA_019236485_Bacteria	Proteobacteria_Gammaproteobacteria_Burkholderiales_Burkholderiaceae_Comamonas_Comamonas-sp019236485
RS_GCF_900564145_Bacteria	Proteobacteria_Gammaproteobacteria_Burkholderiales_Burkholderiaceae_Comamonas_Comamonas-sp900564145
RS_GCF_902706035_Bacteria	Proteobacteria_Gammaproteobacteria_Burkholderiales_Burkholderiaceae_Comamonas_Comamonas-sp902706035
RS_GCF_000241525_Bacteria	Proteobacteria_Gammaproteobacteria_Burkholderiales_Burkholderiaceae_Comamonas_Comamonas-testosteroni
RS_GCF_000739375_Bacteria	Proteobacteria_Gammaproteobacteria_Burkholderiales_Burkholderiaceae_Comamonas_Comamonas-testosteroni_B
RS_GCF_000761245_Bacteria	Proteobacteria_Gammaproteobacteria_Burkholderiales_Burkholderiaceae_Comamonas_Comamonas-testosteroni_C
RS_GCF_008727115_Bacteria	Proteobacteria_Gammaproteobacteria_Burkholderiales_Burkholderiaceae_Comamonas_Comamonas-testosteroni_E
RS_GCF_014076415_Bacteria	Proteobacteria_Gammaproteobacteria_Burkholderiales_Burkholderiaceae_Comamonas_Comamonas-testosteroni_F
RS_GCF_000964545_Bacteria	Proteobacteria_Gammaproteobacteria_Burkholderiales_Burkholderiaceae_Comamonas_Comamonas-thiooxydans
RS_GCF_900094595_Bacteria	Proteobacteria_Gammaproteobacteria_Burkholderiales_Burkholderiaceae_Cupriavidus_Cupriavidus-alkaliphilus
RS_GCF_008801925_Bacteria	Proteobacteria_Gammaproteobacteria_Burkholderiales_Burkholderiaceae_Cupriavidus_Cupriavidus-basilensis
RS_GCF_000243095_Bacteria	Proteobacteria_Gammaproteobacteria_Burkholderiales_Burkholderiaceae_Cupriavidus_Cupriavidus-basilensis_D
RS_GCF_008632125_Bacteria	Proteobacteria_Gammaproteobacteria_Burkholderiales_Burkholderiaceae_Cupriavidus_Cupriavidus-cauae
RS_GCF_008801915_Bacteria	Proteobacteria_Gammaproteobacteria_Burkholderiales_Burkholderiaceae_Cupriavidus_Cupriavidus-gilardii
RS_GCF_013314895_Bacteria	Proteobacteria_Gammaproteobacteria_Burkholderiales_Burkholderiaceae_Cupriavidus_Cupriavidus-gilardii_C
RS_GCF_007829435_Bacteria	Proteobacteria_Gammaproteobacteria_Burkholderiales_Burkholderiaceae_Cupriavidus_Cupriavidus-gilardii_D
RS_GCF_003353055_Bacteria	Proteobacteria_Gammaproteobacteria_Burkholderiales_Burkholderiaceae_Cupriavidus_Cupriavidus-lacunae
RS_GCF_001854325_Bacteria	Proteobacteria_Gammaproteobacteria_Burkholderiales_Burkholderiaceae_Cupriavidus_Cupriavidus-malaysiensis
RS_GCF_001598055_Bacteria	Proteobacteria_Gammaproteobacteria_Burkholderiales_Burkholderiaceae_Cupriavidus_Cupriavidus-nantongensis
RS_GCF_000219215_Bacteria	Proteobacteria_Gammaproteobacteria_Burkholderiales_Burkholderiaceae_Cupriavidus_Cupriavidus-necator
RS_GCF_000744095_Bacteria	Proteobacteria_Gammaproteobacteria_Burkholderiales_Burkholderiaceae_Cupriavidus_Cupriavidus-necator_A
RS_GCF_013141915_Bacteria	Proteobacteria_Gammaproteobacteria_Burkholderiales_Burkholderiaceae_Cupriavidus_Cupriavidus-necator_B
RS_GCF_000372525_Bacteria	Proteobacteria_Gammaproteobacteria_Burkholderiales_Burkholderiaceae_Cupriavidus_Cupriavidus-neocaledonicus
RS_GCF_905397435_Bacteria	Proteobacteria_Gammaproteobacteria_Burkholderiales_Burkholderiaceae_Cupriavidus_Cupriavidus-numazuensis
RS_GCF_016894385_Bacteria	Proteobacteria_Gammaproteobacteria_Burkholderiales_Burkholderiaceae_Cupriavidus_Cupriavidus-oxalaticus
RS_GCF_004768545_Bacteria	Proteobacteria_Gammaproteobacteria_Burkholderiales_Burkholderiaceae_Cupriavidus_Cupriavidus-oxalaticus_A
GB_GCA_000471925_Bacteria	Proteobacteria_Gammaproteobacteria_Burkholderiales_Burkholderiaceae_Cupriavidus_Cupriavidus-pickettii_A
RS_GCF_000203875_Bacteria	Proteobacteria_Gammaproteobacteria_Burkholderiales_Burkholderiaceae_Cupriavidus_Cupriavidus-pinatubonensis
RS_GCF_000379565_Bacteria	Proteobacteria_Gammaproteobacteria_Burkholderiales_Burkholderiaceae_Cupriavidus_Cupriavidus-sp000379565
RS_GCF_000426345_Bacteria	Proteobacteria_Gammaproteobacteria_Burkholderiales_Burkholderiaceae_Cupriavidus_Cupriavidus-sp000426345
RS_GCF_000812465_Bacteria	Proteobacteria_Gammaproteobacteria_Burkholderiales_Burkholderiaceae_Cupriavidus_Cupriavidus-sp000812465
GB_GCA_000955785_Bacteria	Proteobacteria_Gammaproteobacteria_Burkholderiales_Burkholderiaceae_Cupriavidus_Cupriavidus-sp000955785
GB_GCA_001725945_Bacteria	Proteobacteria_Gammaproteobacteria_Burkholderiales_Burkholderiaceae_Cupriavidus_Cupriavidus-sp001725945
RS_GCF_003402535_Bacteria	Proteobacteria_Gammaproteobacteria_Burkholderiales_Burkholderiaceae_Cupriavidus_Cupriavidus-sp003402535
RS_GCF_017814975_Bacteria	Proteobacteria_Gammaproteobacteria_Burkholderiales_Burkholderiaceae_Cupriavidus_Cupriavidus-sp017814975
RS_GCF_000069785_Bacteria	Proteobacteria_Gammaproteobacteria_Burkholderiales_Burkholderiaceae_Cupriavidus_Cupriavidus-taiwanensis
RS_GCF_900250115_Bacteria	Proteobacteria_Gammaproteobacteria_Burkholderiales_Burkholderiaceae_Cupriavidus_Cupriavidus-taiwanensis_B
RS_GCF_900250075_Bacteria	Proteobacteria_Gammaproteobacteria_Burkholderiales_Burkholderiaceae_Cupriavidus_Cupriavidus-taiwanensis_C
RS_GCF_900249755_Bacteria	Proteobacteria_Gammaproteobacteria_Burkholderiales_Burkholderiaceae_Cupriavidus_Cupriavidus-taiwanensis_D
RS_GCF_905397275_Bacteria	Proteobacteria_Gammaproteobacteria_Burkholderiales_Burkholderiaceae_Cupriavidus_Cupriavidus-yeoncheonensis
RS_GCF_014395975_Bacteria	Proteobacteria_Gammaproteobacteria_Burkholderiales_Burkholderiaceae_Diaphorobacter_A_Diaphorobacter_A-ruginosibacter
GB_GCA_002331385_Bacteria	Proteobacteria_Gammaproteobacteria_Burkholderiales_Burkholderiaceae_Diaphorobacter_A_Diaphorobacter_A-sp002331385
RS_GCF_011305995_Bacteria	Proteobacteria_Gammaproteobacteria_Burkholderiales_Burkholderiaceae_Diaphorobacter_A_Diaphorobacter_A-sp011305995
GB_GCA_016861185_Bacteria	Proteobacteria_Gammaproteobacteria_Burkholderiales_Burkholderiaceae_DSNY01_DSNY01-sp016861185
RS_GCF_001189915_Bacteria	Proteobacteria_Gammaproteobacteria_Burkholderiales_Burkholderiaceae_Herbaspirillum_Herbaspirillum-autotrophicum
GB_GCA_000026125_Bacteria	Proteobacteria_Gammaproteobacteria_Burkholderiales_Burkholderiaceae_Herminiimonas_Herminiimonas-arsenicoxydans
RS_GCF_900130075_Bacteria	Proteobacteria_Gammaproteobacteria_Burkholderiales_Burkholderiaceae_Herminiimonas_Herminiimonas-arsenitoxidans
RS_GCF_015645465_Bacteria	Proteobacteria_Gammaproteobacteria_Burkholderiales_Burkholderiaceae_Herminiimonas_Herminiimonas-contaminans
RS_GCF_000013625_Bacteria	Proteobacteria_Gammaproteobacteria_Burkholderiales_Burkholderiaceae_Herminiimonas_Herminiimonas-sp000013625
RS_GCF_003852535_Bacteria	Proteobacteria_Gammaproteobacteria_Burkholderiales_Burkholderiaceae_Herminiimonas_Herminiimonas-sp003852535
RS_GCF_013387465_Bacteria	Proteobacteria_Gammaproteobacteria_Burkholderiales_Burkholderiaceae_Hydrogenophaga_Hydrogenophaga-aromaticivorans
RS_GCF_001761385_Bacteria	Proteobacteria_Gammaproteobacteria_Burkholderiales_Burkholderiaceae_Hydrogenophaga_Hydrogenophaga-crassostreae
RS_GCF_001592285_Bacteria	Proteobacteria_Gammaproteobacteria_Burkholderiales_Burkholderiaceae_Hydrogenophaga_Hydrogenophaga-pseudoflava
GB_GCA_001770905_Bacteria	Proteobacteria_Gammaproteobacteria_Burkholderiales_Burkholderiaceae_Hydrogenophaga_Hydrogenophaga-sp001770905
GB_GCA_002842215_Bacteria	Proteobacteria_Gammaproteobacteria_Burkholderiales_Burkholderiaceae_Hydrogenophaga_Hydrogenophaga-sp002842215
RS_GCF_004795855_Bacteria	Proteobacteria_Gammaproteobacteria_Burkholderiales_Burkholderiaceae_Hydrogenophaga_Hydrogenophaga-sp004795855
GB_GCA_006227825_Bacteria	Proteobacteria_Gammaproteobacteria_Burkholderiales_Burkholderiaceae_Hydrogenophaga_Hydrogenophaga-sp006227825
GB_GCA_011390835_Bacteria	Proteobacteria_Gammaproteobacteria_Burkholderiales_Burkholderiaceae_Hydrogenophaga_Hydrogenophaga-sp011390835
GB_GCA_011391495_Bacteria	Proteobacteria_Gammaproteobacteria_Burkholderiales_Burkholderiaceae_Hydrogenophaga_Hydrogenophaga-sp011391495
GB_GCA_013823655_Bacteria	Proteobacteria_Gammaproteobacteria_Burkholderiales_Burkholderiaceae_Hydrogenophaga_Hydrogenophaga-sp013823655
RS_GCF_001592305_Bacteria	Proteobacteria_Gammaproteobacteria_Burkholderiales_Burkholderiaceae_Hydrogenophaga_Hydrogenophaga-taeniospiralis
RS_GCF_001592265_Bacteria	Proteobacteria_Gammaproteobacteria_Burkholderiales_Burkholderiaceae_Hylemonella_Hylemonella-delicata
RS_GCF_004328645_Bacteria	Proteobacteria_Gammaproteobacteria_Burkholderiales_Burkholderiaceae_Hylemonella_Hylemonella-gracilis_B
RS_GCF_001432305_Bacteria	Proteobacteria_Gammaproteobacteria_Burkholderiales_Burkholderiaceae_Hylemonella_Hylemonella-sp001432305
GB_GCA_002454975_Bacteria	Proteobacteria_Gammaproteobacteria_Burkholderiales_Burkholderiaceae_Hylemonella_Hylemonella-sp002454975
GB_GCA_002633085_Bacteria	Proteobacteria_Gammaproteobacteria_Burkholderiales_Burkholderiaceae_Hylemonella_Hylemonella-sp002633085
RS_GCF_013334205_Bacteria	Proteobacteria_Gammaproteobacteria_Burkholderiales_Burkholderiaceae_Hylemonella_Hylemonella-sp013334205
GB_GCA_016185015_Bacteria	Proteobacteria_Gammaproteobacteria_Burkholderiales_Burkholderiaceae_Hylemonella_Hylemonella-sp016185015
GB_GCA_018815325_Bacteria	Proteobacteria_Gammaproteobacteria_Burkholderiales_Burkholderiaceae_Hylemonella_Hylemonella-sp018815325
RS_GCF_001293525_Bacteria	Proteobacteria_Gammaproteobacteria_Burkholderiales_Burkholderiaceae_Ideonella_A_Ideonella_A-sakaiensis
RS_GCF_008801845_Bacteria	Proteobacteria_Gammaproteobacteria_Burkholderiales_Burkholderiaceae_Ideonella_Ideonella-dechloratans
RS_GCF_002222655_Bacteria	Proteobacteria_Gammaproteobacteria_Burkholderiales_Burkholderiaceae_Ideonella_Ideonella-filiformis
RS_GCF_018069755_Bacteria	Proteobacteria_Gammaproteobacteria_Burkholderiales_Burkholderiaceae_Ideonella_Ideonella-sp018069755
RS_GCF_018069875_Bacteria	Proteobacteria_Gammaproteobacteria_Burkholderiales_Burkholderiaceae_Ideonella_Ideonella-sp018069875
RS_GCF_004004565_Bacteria	Proteobacteria_Gammaproteobacteria_Burkholderiales_Burkholderiaceae_Inhella_Inhella-crocodyli
RS_GCF_016093275_Bacteria	Proteobacteria_Gammaproteobacteria_Burkholderiales_Burkholderiaceae_Inhella_Inhella-proteolytica
GB_GCA_017302655_Bacteria	Proteobacteria_Gammaproteobacteria_Burkholderiales_Burkholderiaceae_Inhella_Inhella-sp017302655
GB_GCA_011391595_Bacteria	Proteobacteria_Gammaproteobacteria_Burkholderiales_Burkholderiaceae_JAABQG01_JAABQG01-sp011391595
GB_GCA_016721925_Bacteria	Proteobacteria_Gammaproteobacteria_Burkholderiales_Burkholderiaceae_JAABQG01_JAABQG01-sp016721925
GB_GCA_013297865_Bacteria	Proteobacteria_Gammaproteobacteria_Burkholderiales_Burkholderiaceae_JAAFIP01_JAAFIP01-sp013297865
GB_GCA_013297925_Bacteria	Proteobacteria_Gammaproteobacteria_Burkholderiales_Burkholderiaceae_JAAFIP01_JAAFIP01-sp013297925
RS_GCF_018413605_Bacteria	Proteobacteria_Gammaproteobacteria_Burkholderiales_Burkholderiaceae_JAAFIP01_JAAFIP01-sp018413605
GB_GCA_013297985_Bacteria	Proteobacteria_Gammaproteobacteria_Burkholderiales_Burkholderiaceae_JAAFIY01_JAAFIY01-sp013297985
GB_GCA_013696665_Bacteria	Proteobacteria_Gammaproteobacteria_Burkholderiales_Burkholderiaceae_JACCZX01_JACCZX01-sp013696665
GB_GCA_013813185_Bacteria	Proteobacteria_Gammaproteobacteria_Burkholderiales_Burkholderiaceae_JACCZX01_JACCZX01-sp013813185
GB_GCA_013297875_Bacteria	Proteobacteria_Gammaproteobacteria_Burkholderiales_Burkholderiaceae_JACMQX01_JACMQX01-sp013297875
GB_GCA_016703665_Bacteria	Proteobacteria_Gammaproteobacteria_Burkholderiales_Burkholderiaceae_JADJBS01_JADJBS01-sp016703665
GB_GCA_016703325_Bacteria	Proteobacteria_Gammaproteobacteria_Burkholderiales_Burkholderiaceae_JADJCH01_JADJCH01-sp016703325
GB_GCA_016790575_Bacteria	Proteobacteria_Gammaproteobacteria_Burkholderiales_Burkholderiaceae_JAEUOU01_JAEUOU01-sp016790575
GB_GCA_019234295_Bacteria	Proteobacteria_Gammaproteobacteria_Burkholderiales_Burkholderiaceae_JAFALK01_JAFALK01-sp019234295
GB_GCA_019232985_Bacteria	Proteobacteria_Gammaproteobacteria_Burkholderiales_Burkholderiaceae_JAFAMW01_JAFAMW01-sp019232985
RS_GCF_004362405_Bacteria	Proteobacteria_Gammaproteobacteria_Burkholderiales_Burkholderiaceae_Kinneretia_Kinneretia-asaccharophila
GB_GCA_013824165_Bacteria	Proteobacteria_Gammaproteobacteria_Burkholderiales_Burkholderiaceae_Kinneretia_Kinneretia-sp013824165
GB_GCA_015657635_Bacteria	Proteobacteria_Gammaproteobacteria_Burkholderiales_Burkholderiaceae_Kinneretia_Kinneretia-sp015657635
RS_GCF_001984095_Bacteria	Proteobacteria_Gammaproteobacteria_Burkholderiales_Burkholderiaceae_KK5_KK5-sp001984095
RS_GCF_008831265_Bacteria	Proteobacteria_Gammaproteobacteria_Burkholderiales_Burkholderiaceae_Lacisediminimonas_Lacisediminimonas-profundi
GB_GCA_016467405_Bacteria	Proteobacteria_Gammaproteobacteria_Burkholderiales_Burkholderiaceae_Lacisediminimonas_Lacisediminimonas-sp016467405
RS_GCF_001269345_Bacteria	Proteobacteria_Gammaproteobacteria_Burkholderiales_Burkholderiaceae_Limnohabitans_A_Limnohabitans_A-sp001269345
RS_GCF_001269365_Bacteria	Proteobacteria_Gammaproteobacteria_Burkholderiales_Burkholderiaceae_Limnohabitans_A_Limnohabitans_A-sp001269365
RS_GCF_001269385_Bacteria	Proteobacteria_Gammaproteobacteria_Burkholderiales_Burkholderiaceae_Limnohabitans_A_Limnohabitans_A-sp001269385
RS_GCF_001412535_Bacteria	Proteobacteria_Gammaproteobacteria_Burkholderiales_Burkholderiaceae_Limnohabitans_A_Limnohabitans_A-sp001412535
RS_GCF_001412575_Bacteria	Proteobacteria_Gammaproteobacteria_Burkholderiales_Burkholderiaceae_Limnohabitans_A_Limnohabitans_A-sp001412575
RS_GCF_001517545_Bacteria	Proteobacteria_Gammaproteobacteria_Burkholderiales_Burkholderiaceae_Limnohabitans_A_Limnohabitans_A-sp001517545
GB_GCA_002255935_Bacteria	Proteobacteria_Gammaproteobacteria_Burkholderiales_Burkholderiaceae_Limnohabitans_A_Limnohabitans_A-sp002255935
GB_GCA_002256145_Bacteria	Proteobacteria_Gammaproteobacteria_Burkholderiales_Burkholderiaceae_Limnohabitans_A_Limnohabitans_A-sp002256145
RS_GCF_002778275_Bacteria	Proteobacteria_Gammaproteobacteria_Burkholderiales_Burkholderiaceae_Limnohabitans_A_Limnohabitans_A-sp002778275
RS_GCF_003063265_Bacteria	Proteobacteria_Gammaproteobacteria_Burkholderiales_Burkholderiaceae_Limnohabitans_A_Limnohabitans_A-sp003063265
RS_GCF_003063315_Bacteria	Proteobacteria_Gammaproteobacteria_Burkholderiales_Burkholderiaceae_Limnohabitans_A_Limnohabitans_A-sp003063315
RS_GCF_003063335_Bacteria	Proteobacteria_Gammaproteobacteria_Burkholderiales_Burkholderiaceae_Limnohabitans_A_Limnohabitans_A-sp003063335
RS_GCF_003063355_Bacteria	Proteobacteria_Gammaproteobacteria_Burkholderiales_Burkholderiaceae_Limnohabitans_A_Limnohabitans_A-sp003063355
RS_GCF_003063415_Bacteria	Proteobacteria_Gammaproteobacteria_Burkholderiales_Burkholderiaceae_Limnohabitans_A_Limnohabitans_A-sp003063415
RS_GCF_003063435_Bacteria	Proteobacteria_Gammaproteobacteria_Burkholderiales_Burkholderiaceae_Limnohabitans_A_Limnohabitans_A-sp003063435
RS_GCF_003063505_Bacteria	Proteobacteria_Gammaproteobacteria_Burkholderiales_Burkholderiaceae_Limnohabitans_A_Limnohabitans_A-sp003063505
RS_GCF_003063575_Bacteria	Proteobacteria_Gammaproteobacteria_Burkholderiales_Burkholderiaceae_Limnohabitans_A_Limnohabitans_A-sp003063575
RS_GCF_003063645_Bacteria	Proteobacteria_Gammaproteobacteria_Burkholderiales_Burkholderiaceae_Limnohabitans_A_Limnohabitans_A-sp003063645
GB_GCA_009693505_Bacteria	Proteobacteria_Gammaproteobacteria_Burkholderiales_Burkholderiaceae_Limnohabitans_A_Limnohabitans_A-sp009693505
GB_GCA_017848645_Bacteria	Proteobacteria_Gammaproteobacteria_Burkholderiales_Burkholderiaceae_Limnohabitans_A_Limnohabitans_A-sp017848645
GB_GCA_017986605_Bacteria	Proteobacteria_Gammaproteobacteria_Burkholderiales_Burkholderiaceae_Limnohabitans_A_Limnohabitans_A-sp017986605
GB_GCA_903844775_Bacteria	Proteobacteria_Gammaproteobacteria_Burkholderiales_Burkholderiaceae_Limnohabitans_A_Limnohabitans_A-sp903844775
GB_GCA_903870145_Bacteria	Proteobacteria_Gammaproteobacteria_Burkholderiales_Burkholderiaceae_Limnohabitans_A_Limnohabitans_A-sp903870145
GB_GCA_903932865_Bacteria	Proteobacteria_Gammaproteobacteria_Burkholderiales_Burkholderiaceae_Limnohabitans_A_Limnohabitans_A-sp903932865
RS_GCF_003063475_Bacteria	Proteobacteria_Gammaproteobacteria_Burkholderiales_Burkholderiaceae_Limnohabitans_Limnohabitans-curvus
GB_GCA_002282445_Bacteria	Proteobacteria_Gammaproteobacteria_Burkholderiales_Burkholderiaceae_Limnohabitans_Limnohabitans-sp002282445
GB_GCA_002347905_Bacteria	Proteobacteria_Gammaproteobacteria_Burkholderiales_Burkholderiaceae_Limnohabitans_Limnohabitans-sp002347905
RS_GCF_002778315_Bacteria	Proteobacteria_Gammaproteobacteria_Burkholderiales_Burkholderiaceae_Limnohabitans_Limnohabitans-sp002778315
RS_GCF_002778325_Bacteria	Proteobacteria_Gammaproteobacteria_Burkholderiales_Burkholderiaceae_Limnohabitans_Limnohabitans-sp002778325
RS_GCF_003063545_Bacteria	Proteobacteria_Gammaproteobacteria_Burkholderiales_Burkholderiaceae_Limnohabitans_Limnohabitans-sp003063545
GB_GCA_005786815_Bacteria	Proteobacteria_Gammaproteobacteria_Burkholderiales_Burkholderiaceae_Limnohabitans_Limnohabitans-sp005786815
GB_GCA_009919175_Bacteria	Proteobacteria_Gammaproteobacteria_Burkholderiales_Burkholderiaceae_Limnohabitans_Limnohabitans-sp009919175
GB_GCA_009921265_Bacteria	Proteobacteria_Gammaproteobacteria_Burkholderiales_Burkholderiaceae_Limnohabitans_Limnohabitans-sp009921265
GB_GCA_009923345_Bacteria	Proteobacteria_Gammaproteobacteria_Burkholderiales_Burkholderiaceae_Limnohabitans_Limnohabitans-sp009923345
GB_GCA_009923505_Bacteria	Proteobacteria_Gammaproteobacteria_Burkholderiales_Burkholderiaceae_Limnohabitans_Limnohabitans-sp009923505
GB_GCA_018882835_Bacteria	Proteobacteria_Gammaproteobacteria_Burkholderiales_Burkholderiaceae_Limnohabitans_Limnohabitans-sp018882835
GB_GCA_018883455_Bacteria	Proteobacteria_Gammaproteobacteria_Burkholderiales_Burkholderiaceae_Limnohabitans_Limnohabitans-sp018883455
GB_GCA_018969975_Bacteria	Proteobacteria_Gammaproteobacteria_Burkholderiales_Burkholderiaceae_Limnohabitans_Limnohabitans-sp018969975
GB_GCA_903845315_Bacteria	Proteobacteria_Gammaproteobacteria_Burkholderiales_Burkholderiaceae_Limnohabitans_Limnohabitans-sp903845315
GB_GCA_903850735_Bacteria	Proteobacteria_Gammaproteobacteria_Burkholderiales_Burkholderiaceae_Limnohabitans_Limnohabitans-sp903850735
GB_GCA_903880855_Bacteria	Proteobacteria_Gammaproteobacteria_Burkholderiales_Burkholderiaceae_Limnohabitans_Limnohabitans-sp903880855
GB_GCA_903887325_Bacteria	Proteobacteria_Gammaproteobacteria_Burkholderiales_Burkholderiaceae_Limnohabitans_Limnohabitans-sp903887325
GB_GCA_903892175_Bacteria	Proteobacteria_Gammaproteobacteria_Burkholderiales_Burkholderiaceae_Limnohabitans_Limnohabitans-sp903892175
GB_GCA_001263235_Bacteria	Proteobacteria_Gammaproteobacteria_Burkholderiales_Burkholderiaceae_LMDS01_LMDS01-sp001263235
RS_GCF_001425865_Bacteria	Proteobacteria_Gammaproteobacteria_Burkholderiales_Burkholderiaceae_LMDS01_LMDS01-sp001425865
RS_GCF_014042345_Bacteria	Proteobacteria_Gammaproteobacteria_Burkholderiales_Burkholderiaceae_LX47W_LX47W-sp014042345
RS_GCF_014042355_Bacteria	Proteobacteria_Gammaproteobacteria_Burkholderiales_Burkholderiaceae_LX47W_LX47W-sp014042355
RS_GCF_014042365_Bacteria	Proteobacteria_Gammaproteobacteria_Burkholderiales_Burkholderiaceae_LX47W_LX47W-sp014042365
RS_GCF_000427785_Bacteria	Proteobacteria_Gammaproteobacteria_Burkholderiales_Burkholderiaceae_Massilia_Massilia-alkalitolerans
RS_GCF_011682045_Bacteria	Proteobacteria_Gammaproteobacteria_Burkholderiales_Burkholderiaceae_Massilia_Massilia-aquatica
RS_GCF_003953935_Bacteria	Proteobacteria_Gammaproteobacteria_Burkholderiales_Burkholderiaceae_Massilia_Massilia-atriviolacea
RS_GCF_002760655_Bacteria	Proteobacteria_Gammaproteobacteria_Burkholderiales_Burkholderiaceae_Massilia_Massilia-eurypsychrophila
RS_GCF_011682175_Bacteria	Proteobacteria_Gammaproteobacteria_Burkholderiales_Burkholderiaceae_Massilia_Massilia-frigida
RS_GCF_011682145_Bacteria	Proteobacteria_Gammaproteobacteria_Burkholderiales_Burkholderiaceae_Massilia_Massilia-mucilaginosa
RS_GCF_011682065_Bacteria	Proteobacteria_Gammaproteobacteria_Burkholderiales_Burkholderiaceae_Massilia_Massilia-rubra
RS_GCF_015689335_Bacteria	Proteobacteria_Gammaproteobacteria_Burkholderiales_Burkholderiaceae_Massilia_Massilia-sp001485665
GB_GCA_002428015_Bacteria	Proteobacteria_Gammaproteobacteria_Burkholderiales_Burkholderiaceae_Massilia_Massilia-sp002428015
RS_GCF_003590855_Bacteria	Proteobacteria_Gammaproteobacteria_Burkholderiales_Burkholderiaceae_Massilia_Massilia-sp003590855
RS_GCF_017811175_Bacteria	Proteobacteria_Gammaproteobacteria_Burkholderiales_Burkholderiaceae_Melaminivora_A_Melaminivora_A-jejuensis
RS_GCF_003008575_Bacteria	Proteobacteria_Gammaproteobacteria_Burkholderiales_Burkholderiaceae_Melaminivora_A_Melaminivora_A-sp003008575
RS_GCF_000015725_Bacteria	Proteobacteria_Gammaproteobacteria_Burkholderiales_Burkholderiaceae_Methylibium_Methylibium-petroleiphilum
GB_GCA_013817345_Bacteria	Proteobacteria_Gammaproteobacteria_Burkholderiales_Burkholderiaceae_Methylibium_Methylibium-sp013817345
RS_GCF_002205645_Bacteria	Proteobacteria_Gammaproteobacteria_Burkholderiales_Burkholderiaceae_Mitsuaria_Mitsuaria-aquatilis
RS_GCF_000400995_Bacteria	Proteobacteria_Gammaproteobacteria_Burkholderiales_Burkholderiaceae_MR-S7_MR-S7-sp000400995
RS_GCF_003590875_Bacteria	Proteobacteria_Gammaproteobacteria_Burkholderiales_Burkholderiaceae_Noviherbaspirillum_Noviherbaspirillum-sp003590875
RS_GCF_003591035_Bacteria	Proteobacteria_Gammaproteobacteria_Burkholderiales_Burkholderiaceae_Noviherbaspirillum_Noviherbaspirillum-sp003591035
RS_GCF_004804275_Bacteria	Proteobacteria_Gammaproteobacteria_Burkholderiales_Burkholderiaceae_Noviherbaspirillum_Noviherbaspirillum-sp004804275
RS_GCF_016467315_Bacteria	Proteobacteria_Gammaproteobacteria_Burkholderiales_Burkholderiaceae_OAE585_OAE585-sp016467315
GB_GCA_013423955_Bacteria	Proteobacteria_Gammaproteobacteria_Burkholderiales_Burkholderiaceae_Ottowia_Ottowia-beijingensis
GB_GCA_001897615_Bacteria	Proteobacteria_Gammaproteobacteria_Burkholderiales_Burkholderiaceae_Ottowia_Ottowia-sp001897615
RS_GCF_008017535_Bacteria	Proteobacteria_Gammaproteobacteria_Burkholderiales_Burkholderiaceae_Ottowia_Ottowia-sp008017535
GB_GCA_016703145_Bacteria	Proteobacteria_Gammaproteobacteria_Burkholderiales_Burkholderiaceae_Ottowia_Ottowia-sp016703145
GB_GCA_017307865_Bacteria	Proteobacteria_Gammaproteobacteria_Burkholderiales_Burkholderiaceae_Ottowia_Ottowia-sp017307865
RS_GCF_017498525_Bacteria	Proteobacteria_Gammaproteobacteria_Burkholderiales_Burkholderiaceae_Ottowia_Ottowia-sp017498525
GB_GCA_018241325_Bacteria	Proteobacteria_Gammaproteobacteria_Burkholderiales_Burkholderiaceae_Ottowia_Ottowia-sp018241325
RS_GCF_000422885_Bacteria	Proteobacteria_Gammaproteobacteria_Burkholderiales_Burkholderiaceae_Ottowia_Ottowia-thiooxydans
RS_GCF_902459765_Bacteria	Proteobacteria_Gammaproteobacteria_Burkholderiales_Burkholderiaceae_Pandoraea_Pandoraea-anapnoica
RS_GCF_902459655_Bacteria	Proteobacteria_Gammaproteobacteria_Burkholderiales_Burkholderiaceae_Pandoraea_Pandoraea-anhela
RS_GCF_001465595_Bacteria	Proteobacteria_Gammaproteobacteria_Burkholderiales_Burkholderiaceae_Pandoraea_Pandoraea-apista
RS_GCF_902459565_Bacteria	Proteobacteria_Gammaproteobacteria_Burkholderiales_Burkholderiaceae_Pandoraea_Pandoraea-aquatica
RS_GCF_902459805_Bacteria	Proteobacteria_Gammaproteobacteria_Burkholderiales_Burkholderiaceae_Pandoraea_Pandoraea-bronchicola
RS_GCF_902459735_Bacteria	Proteobacteria_Gammaproteobacteria_Burkholderiales_Burkholderiaceae_Pandoraea_Pandoraea-capi
RS_GCF_902459775_Bacteria	Proteobacteria_Gammaproteobacteria_Burkholderiales_Burkholderiaceae_Pandoraea_Pandoraea-captiosa
RS_GCF_902459665_Bacteria	Proteobacteria_Gammaproteobacteria_Burkholderiales_Burkholderiaceae_Pandoraea_Pandoraea-cepalis
RS_GCF_902459615_Bacteria	Proteobacteria_Gammaproteobacteria_Burkholderiales_Burkholderiaceae_Pandoraea_Pandoraea-commovens
RS_GCF_902459745_Bacteria	Proteobacteria_Gammaproteobacteria_Burkholderiales_Burkholderiaceae_Pandoraea_Pandoraea-communis
RS_GCF_902459725_Bacteria	Proteobacteria_Gammaproteobacteria_Burkholderiales_Burkholderiaceae_Pandoraea_Pandoraea-eparura
RS_GCF_001029105_Bacteria	Proteobacteria_Gammaproteobacteria_Burkholderiales_Burkholderiaceae_Pandoraea_Pandoraea-faecigallinarum
RS_GCF_000807775_Bacteria	Proteobacteria_Gammaproteobacteria_Burkholderiales_Burkholderiaceae_Pandoraea_Pandoraea-fibrosis
RS_GCF_902459555_Bacteria	Proteobacteria_Gammaproteobacteria_Burkholderiales_Burkholderiaceae_Pandoraea_Pandoraea-horticolens
RS_GCF_902459685_Bacteria	Proteobacteria_Gammaproteobacteria_Burkholderiales_Burkholderiaceae_Pandoraea_Pandoraea-iniqua
RS_GCF_001465545_Bacteria	Proteobacteria_Gammaproteobacteria_Burkholderiales_Burkholderiaceae_Pandoraea_Pandoraea-norimbergensis
RS_GCF_902459585_Bacteria	Proteobacteria_Gammaproteobacteria_Burkholderiales_Burkholderiaceae_Pandoraea_Pandoraea-nosoerga
RS_GCF_000972785_Bacteria	Proteobacteria_Gammaproteobacteria_Burkholderiales_Burkholderiaceae_Pandoraea_Pandoraea-oxalativorans
RS_GCF_902459645_Bacteria	Proteobacteria_Gammaproteobacteria_Burkholderiales_Burkholderiaceae_Pandoraea_Pandoraea-pneumonica
RS_GCF_000767615_Bacteria	Proteobacteria_Gammaproteobacteria_Burkholderiales_Burkholderiaceae_Pandoraea_Pandoraea-pnomenusa
RS_GCF_000815105_Bacteria	Proteobacteria_Gammaproteobacteria_Burkholderiales_Burkholderiaceae_Pandoraea_Pandoraea-pulmonicola
RS_GCF_002179965_Bacteria	Proteobacteria_Gammaproteobacteria_Burkholderiales_Burkholderiaceae_Pandoraea_Pandoraea-sp002179965
RS_GCF_000814845_Bacteria	Proteobacteria_Gammaproteobacteria_Burkholderiales_Burkholderiaceae_Pandoraea_Pandoraea-sputorum
RS_GCF_902459695_Bacteria	Proteobacteria_Gammaproteobacteria_Burkholderiales_Burkholderiaceae_Pandoraea_Pandoraea-terrae
RS_GCF_902459705_Bacteria	Proteobacteria_Gammaproteobacteria_Burkholderiales_Burkholderiaceae_Pandoraea_Pandoraea-terrigena
RS_GCF_000934605_Bacteria	Proteobacteria_Gammaproteobacteria_Burkholderiales_Burkholderiaceae_Pandoraea_Pandoraea-vervacti
RS_GCF_003852425_Bacteria	Proteobacteria_Gammaproteobacteria_Burkholderiales_Burkholderiaceae_Paucibacter_A_Paucibacter_A-sp003852425
GB_GCA_005503085_Bacteria	Proteobacteria_Gammaproteobacteria_Burkholderiales_Burkholderiaceae_Paucibacter_A_Paucibacter_A-sp005503085
GB_GCA_903820745_Bacteria	Proteobacteria_Gammaproteobacteria_Burkholderiales_Burkholderiaceae_Paucibacter_A_Paucibacter_A-sp903820745
GB_GCA_018780645_Bacteria	Proteobacteria_Gammaproteobacteria_Burkholderiales_Burkholderiaceae_Paucibacter_Paucibacter-sp018780645
RS_GCF_004362525_Bacteria	Proteobacteria_Gammaproteobacteria_Burkholderiales_Burkholderiaceae_Paucibacter_Paucibacter-toxinivorans
GB_GCA_017848435_Bacteria	Proteobacteria_Gammaproteobacteria_Burkholderiales_Burkholderiaceae_PCRC01_PCRC01-sp017848435
RS_GCF_002205845_Bacteria	Proteobacteria_Gammaproteobacteria_Burkholderiales_Burkholderiaceae_Pelomonas_Pelomonas-puraquae
RS_GCF_004342485_Bacteria	Proteobacteria_Gammaproteobacteria_Burkholderiales_Burkholderiaceae_Pelomonas_Pelomonas-saccharophila
RS_GCF_001425705_Bacteria	Proteobacteria_Gammaproteobacteria_Burkholderiales_Burkholderiaceae_Pelomonas_Pelomonas-sp001425705
GB_GCA_009996515_Bacteria	Proteobacteria_Gammaproteobacteria_Burkholderiales_Burkholderiaceae_Pelomonas_Pelomonas-sp009996515
GB_GCA_016790285_Bacteria	Proteobacteria_Gammaproteobacteria_Burkholderiales_Burkholderiaceae_Pelomonas_Pelomonas-sp016790285
GB_GCA_019237615_Bacteria	Proteobacteria_Gammaproteobacteria_Burkholderiales_Burkholderiaceae_Pelomonas_Pelomonas-sp019237615
GB_GCA_007994965_Bacteria	Proteobacteria_Gammaproteobacteria_Burkholderiales_Burkholderiaceae_Piscinibacter_Piscinibacter-aquaticus
RS_GCF_004011805_Bacteria	Proteobacteria_Gammaproteobacteria_Burkholderiales_Burkholderiaceae_Piscinibacter_Piscinibacter-defluvii
GB_GCA_016706565_Bacteria	Proteobacteria_Gammaproteobacteria_Burkholderiales_Burkholderiaceae_Piscinibacter_Piscinibacter-sp016706565
RS_GCF_017795745_Bacteria	Proteobacteria_Gammaproteobacteria_Burkholderiales_Burkholderiaceae_Piscinibacter_Piscinibacter-sp017795745
RS_GCF_014641715_Bacteria	Proteobacteria_Gammaproteobacteria_Burkholderiales_Burkholderiaceae_Polaromonas_Polaromonas-eurypsychrophila
RS_GCF_001598235_Bacteria	Proteobacteria_Gammaproteobacteria_Burkholderiales_Burkholderiaceae_Polaromonas_Polaromonas-jejuensis
RS_GCF_000013865_Bacteria	Proteobacteria_Gammaproteobacteria_Burkholderiales_Burkholderiaceae_Polaromonas_Polaromonas-sp000013865
RS_GCF_000282655_Bacteria	Proteobacteria_Gammaproteobacteria_Burkholderiales_Burkholderiaceae_Polaromonas_Polaromonas-sp000282655
RS_GCF_002001015_Bacteria	Proteobacteria_Gammaproteobacteria_Burkholderiales_Burkholderiaceae_Polaromonas_Polaromonas-sp002001015
GB_GCA_002256925_Bacteria	Proteobacteria_Gammaproteobacteria_Burkholderiales_Burkholderiaceae_Polaromonas_Polaromonas-sp002256925
RS_GCF_003711205_Bacteria	Proteobacteria_Gammaproteobacteria_Burkholderiales_Burkholderiaceae_Polaromonas_Polaromonas-sp003711205
GB_GCA_013824015_Bacteria	Proteobacteria_Gammaproteobacteria_Burkholderiales_Burkholderiaceae_Polaromonas_Polaromonas-sp013824015
GB_GCA_016185115_Bacteria	Proteobacteria_Gammaproteobacteria_Burkholderiales_Burkholderiaceae_Polaromonas_Polaromonas-sp016185115
GB_GCA_016868205_Bacteria	Proteobacteria_Gammaproteobacteria_Burkholderiales_Burkholderiaceae_Polaromonas_Polaromonas-sp016868205
GB_GCA_018780625_Bacteria	Proteobacteria_Gammaproteobacteria_Burkholderiales_Burkholderiaceae_Polaromonas_Polaromonas-sp018780625
RS_GCF_900103405_Bacteria	Proteobacteria_Gammaproteobacteria_Burkholderiales_Burkholderiaceae_Polaromonas_Polaromonas-sp900103405
RS_GCF_900112285_Bacteria	Proteobacteria_Gammaproteobacteria_Burkholderiales_Burkholderiaceae_Polaromonas_Polaromonas-sp900112285
RS_GCF_900116715_Bacteria	Proteobacteria_Gammaproteobacteria_Burkholderiales_Burkholderiaceae_Polaromonas_Polaromonas-sp900116715
GB_GCA_903844825_Bacteria	Proteobacteria_Gammaproteobacteria_Burkholderiales_Burkholderiaceae_Polaromonas_Polaromonas-sp903844825
GB_GCA_903941205_Bacteria	Proteobacteria_Gammaproteobacteria_Burkholderiales_Burkholderiaceae_Polaromonas_Polaromonas-sp903941205
RS_GCF_003065385_Bacteria	Proteobacteria_Gammaproteobacteria_Burkholderiales_Burkholderiaceae_Polynucleobacter_Polynucleobacter-acidiphobus
RS_GCF_002206635_Bacteria	Proteobacteria_Gammaproteobacteria_Burkholderiales_Burkholderiaceae_Polynucleobacter_Polynucleobacter-aenigmaticus
RS_GCF_000016345_Bacteria	Proteobacteria_Gammaproteobacteria_Burkholderiales_Burkholderiaceae_Polynucleobacter_Polynucleobacter-asymbioticus
RS_GCF_018687575_Bacteria	Proteobacteria_Gammaproteobacteria_Burkholderiales_Burkholderiaceae_Polynucleobacter_Polynucleobacter-asymbioticus_C
RS_GCF_003065365_Bacteria	Proteobacteria_Gammaproteobacteria_Burkholderiales_Burkholderiaceae_Polynucleobacter_Polynucleobacter-difficilis
RS_GCF_000973625_Bacteria	Proteobacteria_Gammaproteobacteria_Burkholderiales_Burkholderiaceae_Polynucleobacter_Polynucleobacter-duraquae
RS_GCF_002192535_Bacteria	Proteobacteria_Gammaproteobacteria_Burkholderiales_Burkholderiaceae_Polynucleobacter_Polynucleobacter-hirudinilacicola
RS_GCF_900095205_Bacteria	Proteobacteria_Gammaproteobacteria_Burkholderiales_Burkholderiaceae_Polynucleobacter_Polynucleobacter-necessarius_E
RS_GCF_900095175_Bacteria	Proteobacteria_Gammaproteobacteria_Burkholderiales_Burkholderiaceae_Polynucleobacter_Polynucleobacter-necessarius_I
GB_GCA_900095165_Bacteria	Proteobacteria_Gammaproteobacteria_Burkholderiales_Burkholderiaceae_Polynucleobacter_Polynucleobacter-necessarius_J
RS_GCF_900096755_Bacteria	Proteobacteria_Gammaproteobacteria_Burkholderiales_Burkholderiaceae_Polynucleobacter_Polynucleobacter-necessarius_K
RS_GCF_001595985_Bacteria	Proteobacteria_Gammaproteobacteria_Burkholderiales_Burkholderiaceae_Polynucleobacter_Polynucleobacter-sinensis
GB_GCA_000342265_Bacteria	Proteobacteria_Gammaproteobacteria_Burkholderiales_Burkholderiaceae_Polynucleobacter_Polynucleobacter-sp000342265
GB_GCA_001830325_Bacteria	Proteobacteria_Gammaproteobacteria_Burkholderiales_Burkholderiaceae_Polynucleobacter_Polynucleobacter-sp001830325
RS_GCF_002797575_Bacteria	Proteobacteria_Gammaproteobacteria_Burkholderiales_Burkholderiaceae_Polynucleobacter_Polynucleobacter-sp002797575
GB_GCA_009927445_Bacteria	Proteobacteria_Gammaproteobacteria_Burkholderiales_Burkholderiaceae_Polynucleobacter_Polynucleobacter-sp009927445
RS_GCF_018687475_Bacteria	Proteobacteria_Gammaproteobacteria_Burkholderiales_Burkholderiaceae_Polynucleobacter_Polynucleobacter-sp009928245
GB_GCA_013205155_Bacteria	Proteobacteria_Gammaproteobacteria_Burkholderiales_Burkholderiaceae_Polynucleobacter_Polynucleobacter-sp013205155
RS_GCF_013307245_Bacteria	Proteobacteria_Gammaproteobacteria_Burkholderiales_Burkholderiaceae_Polynucleobacter_Polynucleobacter-sp013307245
GB_GCA_016462905_Bacteria	Proteobacteria_Gammaproteobacteria_Burkholderiales_Burkholderiaceae_Polynucleobacter_Polynucleobacter-sp016462905
RS_GCF_018687075_Bacteria	Proteobacteria_Gammaproteobacteria_Burkholderiales_Burkholderiaceae_Polynucleobacter_Polynucleobacter-sp018687075
RS_GCF_018687275_Bacteria	Proteobacteria_Gammaproteobacteria_Burkholderiales_Burkholderiaceae_Polynucleobacter_Polynucleobacter-sp018687275
RS_GCF_018687355_Bacteria	Proteobacteria_Gammaproteobacteria_Burkholderiales_Burkholderiaceae_Polynucleobacter_Polynucleobacter-sp018687355
RS_GCF_018687535_Bacteria	Proteobacteria_Gammaproteobacteria_Burkholderiales_Burkholderiaceae_Polynucleobacter_Polynucleobacter-sp018687535
RS_GCF_018687635_Bacteria	Proteobacteria_Gammaproteobacteria_Burkholderiales_Burkholderiaceae_Polynucleobacter_Polynucleobacter-sp018687635
RS_GCF_018687675_Bacteria	Proteobacteria_Gammaproteobacteria_Burkholderiales_Burkholderiaceae_Polynucleobacter_Polynucleobacter-sp018687675
RS_GCF_018687695_Bacteria	Proteobacteria_Gammaproteobacteria_Burkholderiales_Burkholderiaceae_Polynucleobacter_Polynucleobacter-sp018687695
RS_GCF_018687735_Bacteria	Proteobacteria_Gammaproteobacteria_Burkholderiales_Burkholderiaceae_Polynucleobacter_Polynucleobacter-sp018687735
RS_GCF_018687755_Bacteria	Proteobacteria_Gammaproteobacteria_Burkholderiales_Burkholderiaceae_Polynucleobacter_Polynucleobacter-sp018687755
RS_GCF_018687815_Bacteria	Proteobacteria_Gammaproteobacteria_Burkholderiales_Burkholderiaceae_Polynucleobacter_Polynucleobacter-sp018687815
RS_GCF_018687895_Bacteria	Proteobacteria_Gammaproteobacteria_Burkholderiales_Burkholderiaceae_Polynucleobacter_Polynucleobacter-sp018687895
RS_GCF_018687935_Bacteria	Proteobacteria_Gammaproteobacteria_Burkholderiales_Burkholderiaceae_Polynucleobacter_Polynucleobacter-sp018687935
RS_GCF_018687955_Bacteria	Proteobacteria_Gammaproteobacteria_Burkholderiales_Burkholderiaceae_Polynucleobacter_Polynucleobacter-sp018687955
RS_GCF_018687975_Bacteria	Proteobacteria_Gammaproteobacteria_Burkholderiales_Burkholderiaceae_Polynucleobacter_Polynucleobacter-sp018687975
RS_GCF_018688095_Bacteria	Proteobacteria_Gammaproteobacteria_Burkholderiales_Burkholderiaceae_Polynucleobacter_Polynucleobacter-sp018688095
RS_GCF_018688155_Bacteria	Proteobacteria_Gammaproteobacteria_Burkholderiales_Burkholderiaceae_Polynucleobacter_Polynucleobacter-sp018688155
RS_GCF_018688235_Bacteria	Proteobacteria_Gammaproteobacteria_Burkholderiales_Burkholderiaceae_Polynucleobacter_Polynucleobacter-sp018688235
RS_GCF_018688255_Bacteria	Proteobacteria_Gammaproteobacteria_Burkholderiales_Burkholderiaceae_Polynucleobacter_Polynucleobacter-sp018688255
RS_GCF_018688315_Bacteria	Proteobacteria_Gammaproteobacteria_Burkholderiales_Burkholderiaceae_Polynucleobacter_Polynucleobacter-sp018688315
RS_GCF_018688335_Bacteria	Proteobacteria_Gammaproteobacteria_Burkholderiales_Burkholderiaceae_Polynucleobacter_Polynucleobacter-sp018688335
RS_GCF_018688355_Bacteria	Proteobacteria_Gammaproteobacteria_Burkholderiales_Burkholderiaceae_Polynucleobacter_Polynucleobacter-sp018688355
RS_GCF_018688375_Bacteria	Proteobacteria_Gammaproteobacteria_Burkholderiales_Burkholderiaceae_Polynucleobacter_Polynucleobacter-sp018688375
RS_GCF_018688495_Bacteria	Proteobacteria_Gammaproteobacteria_Burkholderiales_Burkholderiaceae_Polynucleobacter_Polynucleobacter-sp018688495
RS_GCF_018881505_Bacteria	Proteobacteria_Gammaproteobacteria_Burkholderiales_Burkholderiaceae_Polynucleobacter_Polynucleobacter-sp018881505
RS_GCF_018881545_Bacteria	Proteobacteria_Gammaproteobacteria_Burkholderiales_Burkholderiaceae_Polynucleobacter_Polynucleobacter-sp018881545
RS_GCF_018881575_Bacteria	Proteobacteria_Gammaproteobacteria_Burkholderiales_Burkholderiaceae_Polynucleobacter_Polynucleobacter-sp018881575
RS_GCF_018881605_Bacteria	Proteobacteria_Gammaproteobacteria_Burkholderiales_Burkholderiaceae_Polynucleobacter_Polynucleobacter-sp018881605
RS_GCF_018881635_Bacteria	Proteobacteria_Gammaproteobacteria_Burkholderiales_Burkholderiaceae_Polynucleobacter_Polynucleobacter-sp018881635
RS_GCF_018881715_Bacteria	Proteobacteria_Gammaproteobacteria_Burkholderiales_Burkholderiaceae_Polynucleobacter_Polynucleobacter-sp018881715
RS_GCF_018881795_Bacteria	Proteobacteria_Gammaproteobacteria_Burkholderiales_Burkholderiaceae_Polynucleobacter_Polynucleobacter-sp018881795
RS_GCF_018881815_Bacteria	Proteobacteria_Gammaproteobacteria_Burkholderiales_Burkholderiaceae_Polynucleobacter_Polynucleobacter-sp018881815
RS_GCF_018881835_Bacteria	Proteobacteria_Gammaproteobacteria_Burkholderiales_Burkholderiaceae_Polynucleobacter_Polynucleobacter-sp018881835
RS_GCF_018881855_Bacteria	Proteobacteria_Gammaproteobacteria_Burkholderiales_Burkholderiaceae_Polynucleobacter_Polynucleobacter-sp018881855
RS_GCF_018881905_Bacteria	Proteobacteria_Gammaproteobacteria_Burkholderiales_Burkholderiaceae_Polynucleobacter_Polynucleobacter-sp018881905
RS_GCF_018881965_Bacteria	Proteobacteria_Gammaproteobacteria_Burkholderiales_Burkholderiaceae_Polynucleobacter_Polynucleobacter-sp018881965
RS_GCF_018882055_Bacteria	Proteobacteria_Gammaproteobacteria_Burkholderiales_Burkholderiaceae_Polynucleobacter_Polynucleobacter-sp018882055
RS_GCF_018882085_Bacteria	Proteobacteria_Gammaproteobacteria_Burkholderiales_Burkholderiaceae_Polynucleobacter_Polynucleobacter-sp018882085
RS_GCF_018882095_Bacteria	Proteobacteria_Gammaproteobacteria_Burkholderiales_Burkholderiaceae_Polynucleobacter_Polynucleobacter-sp018882095
RS_GCF_018882125_Bacteria	Proteobacteria_Gammaproteobacteria_Burkholderiales_Burkholderiaceae_Polynucleobacter_Polynucleobacter-sp018882125
RS_GCF_018882155_Bacteria	Proteobacteria_Gammaproteobacteria_Burkholderiales_Burkholderiaceae_Polynucleobacter_Polynucleobacter-sp018882155
RS_GCF_018882185_Bacteria	Proteobacteria_Gammaproteobacteria_Burkholderiales_Burkholderiaceae_Polynucleobacter_Polynucleobacter-sp018882185
RS_GCF_018882205_Bacteria	Proteobacteria_Gammaproteobacteria_Burkholderiales_Burkholderiaceae_Polynucleobacter_Polynucleobacter-sp018882205
RS_GCF_018882245_Bacteria	Proteobacteria_Gammaproteobacteria_Burkholderiales_Burkholderiaceae_Polynucleobacter_Polynucleobacter-sp018882245
RS_GCF_018882295_Bacteria	Proteobacteria_Gammaproteobacteria_Burkholderiales_Burkholderiaceae_Polynucleobacter_Polynucleobacter-sp018882295
RS_GCF_018882325_Bacteria	Proteobacteria_Gammaproteobacteria_Burkholderiales_Burkholderiaceae_Polynucleobacter_Polynucleobacter-sp018882325
RS_GCF_018882335_Bacteria	Proteobacteria_Gammaproteobacteria_Burkholderiales_Burkholderiaceae_Polynucleobacter_Polynucleobacter-sp018882335
RS_GCF_018882365_Bacteria	Proteobacteria_Gammaproteobacteria_Burkholderiales_Burkholderiaceae_Polynucleobacter_Polynucleobacter-sp018882365
RS_GCF_018882405_Bacteria	Proteobacteria_Gammaproteobacteria_Burkholderiales_Burkholderiaceae_Polynucleobacter_Polynucleobacter-sp018882405
RS_GCF_018882415_Bacteria	Proteobacteria_Gammaproteobacteria_Burkholderiales_Burkholderiaceae_Polynucleobacter_Polynucleobacter-sp018882415
RS_GCF_018882445_Bacteria	Proteobacteria_Gammaproteobacteria_Burkholderiales_Burkholderiaceae_Polynucleobacter_Polynucleobacter-sp018882445
RS_GCF_018882465_Bacteria	Proteobacteria_Gammaproteobacteria_Burkholderiales_Burkholderiaceae_Polynucleobacter_Polynucleobacter-sp018882465
GB_GCA_903837335_Bacteria	Proteobacteria_Gammaproteobacteria_Burkholderiales_Burkholderiaceae_Polynucleobacter_Polynucleobacter-sp903837335
GB_GCA_903843315_Bacteria	Proteobacteria_Gammaproteobacteria_Burkholderiales_Burkholderiaceae_Polynucleobacter_Polynucleobacter-sp903843315
GB_GCA_903871735_Bacteria	Proteobacteria_Gammaproteobacteria_Burkholderiales_Burkholderiaceae_Polynucleobacter_Polynucleobacter-sp903871735
GB_GCA_903909925_Bacteria	Proteobacteria_Gammaproteobacteria_Burkholderiales_Burkholderiaceae_Polynucleobacter_Polynucleobacter-sp903909925
GB_GCA_903918115_Bacteria	Proteobacteria_Gammaproteobacteria_Burkholderiales_Burkholderiaceae_Polynucleobacter_Polynucleobacter-sp903918115
GB_GCA_903935355_Bacteria	Proteobacteria_Gammaproteobacteria_Burkholderiales_Burkholderiaceae_Polynucleobacter_Polynucleobacter-sp903935355
GB_GCA_903944725_Bacteria	Proteobacteria_Gammaproteobacteria_Burkholderiales_Burkholderiaceae_Polynucleobacter_Polynucleobacter-sp903944725
RS_GCF_018881755_Bacteria	Proteobacteria_Gammaproteobacteria_Burkholderiales_Burkholderiaceae_Polynucleobacter_Polynucleobacter-sp903953215
GB_GCA_903995005_Bacteria	Proteobacteria_Gammaproteobacteria_Burkholderiales_Burkholderiaceae_Polynucleobacter_Polynucleobacter-sp903995005
RS_GCF_001595965_Bacteria	Proteobacteria_Gammaproteobacteria_Burkholderiales_Burkholderiaceae_Polynucleobacter_Polynucleobacter-yangtzensis
RS_GCF_009857595_Bacteria	Proteobacteria_Gammaproteobacteria_Burkholderiales_Burkholderiaceae_Pseudoduganella_Pseudoduganella-aquatica_A
RS_GCF_001425045_Bacteria	Proteobacteria_Gammaproteobacteria_Burkholderiales_Burkholderiaceae_Pseudoduganella_Pseudoduganella-sp001425045
RS_GCF_001425265_Bacteria	Proteobacteria_Gammaproteobacteria_Burkholderiales_Burkholderiaceae_Pseudoduganella_Pseudoduganella-sp001425265
RS_GCF_003053665_Bacteria	Proteobacteria_Gammaproteobacteria_Burkholderiales_Burkholderiaceae_Pseudoduganella_Pseudoduganella-sp003053665
RS_GCF_003337555_Bacteria	Proteobacteria_Gammaproteobacteria_Burkholderiales_Burkholderiaceae_Pseudorhodoferax_Pseudorhodoferax-soli
RS_GCF_001422365_Bacteria	Proteobacteria_Gammaproteobacteria_Burkholderiales_Burkholderiaceae_Pseudorhodoferax_Pseudorhodoferax-sp001422365
RS_GCF_001422405_Bacteria	Proteobacteria_Gammaproteobacteria_Burkholderiales_Burkholderiaceae_Pseudorhodoferax_Pseudorhodoferax-sp001422405
RS_GCF_014202215_Bacteria	Proteobacteria_Gammaproteobacteria_Burkholderiales_Burkholderiaceae_Quisquiliibacterium_Quisquiliibacterium-transsilvanicum
RS_GCF_015159745_Bacteria	Proteobacteria_Gammaproteobacteria_Burkholderiales_Burkholderiaceae_Ramlibacter_Ramlibacter-aquaticus
RS_GCF_016654015_Bacteria	Proteobacteria_Gammaproteobacteria_Burkholderiales_Burkholderiaceae_Ramlibacter_Ramlibacter-ginsenosidimutans
RS_GCF_004682015_Bacteria	Proteobacteria_Gammaproteobacteria_Burkholderiales_Burkholderiaceae_Ramlibacter_Ramlibacter-henchirensis
RS_GCF_009646335_Bacteria	Proteobacteria_Gammaproteobacteria_Burkholderiales_Burkholderiaceae_Ramlibacter_Ramlibacter-koreensis
RS_GCF_012184415_Bacteria	Proteobacteria_Gammaproteobacteria_Burkholderiales_Burkholderiaceae_Ramlibacter_Ramlibacter-lithotrophicus
RS_GCF_004681965_Bacteria	Proteobacteria_Gammaproteobacteria_Burkholderiales_Burkholderiaceae_Ramlibacter_Ramlibacter-rhizophilus
RS_GCF_001044395_Bacteria	Proteobacteria_Gammaproteobacteria_Burkholderiales_Burkholderiaceae_Ramlibacter_Ramlibacter-sp001044395
RS_GCF_001424545_Bacteria	Proteobacteria_Gammaproteobacteria_Burkholderiales_Burkholderiaceae_Ramlibacter_Ramlibacter-sp001424545
RS_GCF_003797765_Bacteria	Proteobacteria_Gammaproteobacteria_Burkholderiales_Burkholderiaceae_Ramlibacter_Ramlibacter-sp003797765
GB_GCA_004144865_Bacteria	Proteobacteria_Gammaproteobacteria_Burkholderiales_Burkholderiaceae_Ramlibacter_Ramlibacter-sp004144865
RS_GCF_004681975_Bacteria	Proteobacteria_Gammaproteobacteria_Burkholderiales_Burkholderiaceae_Ramlibacter_Ramlibacter-sp004681975
RS_GCF_007833165_Bacteria	Proteobacteria_Gammaproteobacteria_Burkholderiales_Burkholderiaceae_Ramlibacter_Ramlibacter-sp007833165
GB_GCA_013815685_Bacteria	Proteobacteria_Gammaproteobacteria_Burkholderiales_Burkholderiaceae_Ramlibacter_Ramlibacter-sp013815685
RS_GCF_014297445_Bacteria	Proteobacteria_Gammaproteobacteria_Burkholderiales_Burkholderiaceae_Ramlibacter_Ramlibacter-sp014297445
RS_GCF_014297465_Bacteria	Proteobacteria_Gammaproteobacteria_Burkholderiales_Burkholderiaceae_Ramlibacter_Ramlibacter-sp014297465
GB_GCA_014376915_Bacteria	Proteobacteria_Gammaproteobacteria_Burkholderiales_Burkholderiaceae_Ramlibacter_Ramlibacter-sp014376915
RS_GCF_014874145_Bacteria	Proteobacteria_Gammaproteobacteria_Burkholderiales_Burkholderiaceae_Ramlibacter_Ramlibacter-sp014874145
RS_GCF_015070875_Bacteria	Proteobacteria_Gammaproteobacteria_Burkholderiales_Burkholderiaceae_Ramlibacter_Ramlibacter-sp015070875
GB_GCA_016191525_Bacteria	Proteobacteria_Gammaproteobacteria_Burkholderiales_Burkholderiaceae_Ramlibacter_Ramlibacter-sp016191525
GB_GCA_016213325_Bacteria	Proteobacteria_Gammaproteobacteria_Burkholderiales_Burkholderiaceae_Ramlibacter_Ramlibacter-sp016213325
RS_GCF_016641735_Bacteria	Proteobacteria_Gammaproteobacteria_Burkholderiales_Burkholderiaceae_Ramlibacter_Ramlibacter-sp016641735
GB_GCA_016713005_Bacteria	Proteobacteria_Gammaproteobacteria_Burkholderiales_Burkholderiaceae_Ramlibacter_Ramlibacter-sp016713005
RS_GCF_016722895_Bacteria	Proteobacteria_Gammaproteobacteria_Burkholderiales_Burkholderiaceae_Ramlibacter_Ramlibacter-sp016722895
GB_GCA_017988075_Bacteria	Proteobacteria_Gammaproteobacteria_Burkholderiales_Burkholderiaceae_Ramlibacter_Ramlibacter-sp017988075
RS_GCF_000215705_Bacteria	Proteobacteria_Gammaproteobacteria_Burkholderiales_Burkholderiaceae_Ramlibacter_Ramlibacter-tataouinensis
RS_GCF_001580455_Bacteria	Proteobacteria_Gammaproteobacteria_Burkholderiales_Burkholderiaceae_Ramlibacter_Ramlibacter-tataouinensis_B
GB_GCA_009923315_Bacteria	Proteobacteria_Gammaproteobacteria_Burkholderiales_Burkholderiaceae_RFTU01_RFTU01-sp009923315
GB_GCA_016868355_Bacteria	Proteobacteria_Gammaproteobacteria_Burkholderiales_Burkholderiaceae_RFTU01_RFTU01-sp016868355
GB_GCA_018780185_Bacteria	Proteobacteria_Gammaproteobacteria_Burkholderiales_Burkholderiaceae_Rhizobacter_Rhizobacter-sp018780185
GB_GCA_002083775_Bacteria	Proteobacteria_Gammaproteobacteria_Burkholderiales_Burkholderiaceae_Rhodoferax_Rhodoferax-ferrireducens_A
GB_GCA_001771065_Bacteria	Proteobacteria_Gammaproteobacteria_Burkholderiales_Burkholderiaceae_Rhodoferax_Rhodoferax-sp001771065
GB_GCA_002381045_Bacteria	Proteobacteria_Gammaproteobacteria_Burkholderiales_Burkholderiaceae_Rhodoferax_Rhodoferax-sp002381045
RS_GCF_003347515_Bacteria	Proteobacteria_Gammaproteobacteria_Burkholderiales_Burkholderiaceae_Rhodoferax_Rhodoferax-sp003347515
GB_GCA_005793295_Bacteria	Proteobacteria_Gammaproteobacteria_Burkholderiales_Burkholderiaceae_Rhodoferax_Rhodoferax-sp005793295
GB_GCA_011391545_Bacteria	Proteobacteria_Gammaproteobacteria_Burkholderiales_Burkholderiaceae_Rhodoferax_Rhodoferax-sp011391545
GB_GCA_011391645_Bacteria	Proteobacteria_Gammaproteobacteria_Burkholderiales_Burkholderiaceae_Rhodoferax_Rhodoferax-sp011391645
GB_GCA_016463455_Bacteria	Proteobacteria_Gammaproteobacteria_Burkholderiales_Burkholderiaceae_Rhodoferax_Rhodoferax-sp016463455
GB_GCA_016705575_Bacteria	Proteobacteria_Gammaproteobacteria_Burkholderiales_Burkholderiaceae_Rhodoferax_Rhodoferax-sp016705575
RS_GCF_017948265_Bacteria	Proteobacteria_Gammaproteobacteria_Burkholderiales_Burkholderiaceae_Rhodoferax_Rhodoferax-sp017948265
GB_GCA_018780565_Bacteria	Proteobacteria_Gammaproteobacteria_Burkholderiales_Burkholderiaceae_Rhodoferax_Rhodoferax-sp018780565
GB_GCA_903845935_Bacteria	Proteobacteria_Gammaproteobacteria_Burkholderiales_Burkholderiaceae_Rhodoferax_Rhodoferax-sp903845935
GB_GCA_903869595_Bacteria	Proteobacteria_Gammaproteobacteria_Burkholderiales_Burkholderiaceae_Rhodoferax_Rhodoferax-sp903869595
GB_GCA_903948045_Bacteria	Proteobacteria_Gammaproteobacteria_Burkholderiales_Burkholderiaceae_Rhodoferax_Rhodoferax-sp903948045
GB_GCA_903960915_Bacteria	Proteobacteria_Gammaproteobacteria_Burkholderiales_Burkholderiaceae_Rhodoferax_Rhodoferax-sp903960915
GB_GCA_000496475_Bacteria	Proteobacteria_Gammaproteobacteria_Burkholderiales_Burkholderiaceae_RS62_RS62-sp000496475
GB_GCA_001295865_Bacteria	Proteobacteria_Gammaproteobacteria_Burkholderiales_Burkholderiaceae_Rubrivivax_Rubrivivax-sp001295865
GB_GCA_001295905_Bacteria	Proteobacteria_Gammaproteobacteria_Burkholderiales_Burkholderiaceae_Rubrivivax_Rubrivivax-sp001295905
GB_GCA_001724995_Bacteria	Proteobacteria_Gammaproteobacteria_Burkholderiales_Burkholderiaceae_Rubrivivax_Rubrivivax-sp001724995
GB_GCA_009923895_Bacteria	Proteobacteria_Gammaproteobacteria_Burkholderiales_Burkholderiaceae_Rubrivivax_Rubrivivax-sp009923895
GB_GCA_013822265_Bacteria	Proteobacteria_Gammaproteobacteria_Burkholderiales_Burkholderiaceae_Rubrivivax_Rubrivivax-sp013822265
GB_GCA_016704535_Bacteria	Proteobacteria_Gammaproteobacteria_Burkholderiales_Burkholderiaceae_Rubrivivax_Rubrivivax-sp016704535
GB_GCA_016707445_Bacteria	Proteobacteria_Gammaproteobacteria_Burkholderiales_Burkholderiaceae_Rubrivivax_Rubrivivax-sp016707445
GB_GCA_016789955_Bacteria	Proteobacteria_Gammaproteobacteria_Burkholderiales_Burkholderiaceae_Rubrivivax_Rubrivivax-sp016789955
GB_GCA_018780805_Bacteria	Proteobacteria_Gammaproteobacteria_Burkholderiales_Burkholderiaceae_Rubrivivax_Rubrivivax-sp018780805
GB_GCA_018971105_Bacteria	Proteobacteria_Gammaproteobacteria_Burkholderiales_Burkholderiaceae_Rubrivivax_Rubrivivax-sp018971105
GB_GCA_903822435_Bacteria	Proteobacteria_Gammaproteobacteria_Burkholderiales_Burkholderiaceae_Rubrivivax_Rubrivivax-sp903822435
GB_GCA_903914615_Bacteria	Proteobacteria_Gammaproteobacteria_Burkholderiales_Burkholderiaceae_Rubrivivax_Rubrivivax-sp903914615
GB_GCA_001898645_Bacteria	Proteobacteria_Gammaproteobacteria_Burkholderiales_Burkholderiaceae_SCN-69-89_SCN-69-89-sp001898645
GB_GCA_003576795_Bacteria	Proteobacteria_Gammaproteobacteria_Burkholderiales_Burkholderiaceae_SCN-69-89_SCN-69-89-sp003576795
GB_GCA_012513825_Bacteria	Proteobacteria_Gammaproteobacteria_Burkholderiales_Burkholderiaceae_SCN-69-89_SCN-69-89-sp012513825
RS_GCF_014145335_Bacteria	Proteobacteria_Gammaproteobacteria_Burkholderiales_Burkholderiaceae_SJAQ100_SJAQ100-sp014145335
RS_GCF_016735685_Bacteria	Proteobacteria_Gammaproteobacteria_Burkholderiales_Burkholderiaceae_SJAQ100_SJAQ100-sp016735685
RS_GCF_013410775_Bacteria	Proteobacteria_Gammaproteobacteria_Burkholderiales_Burkholderiaceae_Sphaerotilus_Sphaerotilus-montanus
GB_GCA_013299055_Bacteria	Proteobacteria_Gammaproteobacteria_Burkholderiales_Burkholderiaceae_Sphaerotilus_Sphaerotilus-sp013299055
GB_GCA_013299175_Bacteria	Proteobacteria_Gammaproteobacteria_Burkholderiales_Burkholderiaceae_Sphaerotilus_Sphaerotilus-sp013299175
RS_GCF_008329925_Bacteria	Proteobacteria_Gammaproteobacteria_Burkholderiales_Burkholderiaceae_Sphaerotilus_Sphaerotilus-sulfidivorans
GB_GCA_005798775_Bacteria	Proteobacteria_Gammaproteobacteria_Burkholderiales_Burkholderiaceae_SYIM01_SYIM01-sp005798775
GB_GCA_009921765_Bacteria	Proteobacteria_Gammaproteobacteria_Burkholderiales_Burkholderiaceae_SYIM01_SYIM01-sp009921765
GB_GCA_016868375_Bacteria	Proteobacteria_Gammaproteobacteria_Burkholderiales_Burkholderiaceae_SYIM01_SYIM01-sp016868375
GB_GCA_903866395_Bacteria	Proteobacteria_Gammaproteobacteria_Burkholderiales_Burkholderiaceae_SYIM01_SYIM01-sp903866395
GB_GCA_903907905_Bacteria	Proteobacteria_Gammaproteobacteria_Burkholderiales_Burkholderiaceae_SYIM01_SYIM01-sp903907905
RS_GCF_007556755_Bacteria	Proteobacteria_Gammaproteobacteria_Burkholderiales_Burkholderiaceae_Tepidimonas_Tepidimonas-fonticaldi
RS_GCF_007556605_Bacteria	Proteobacteria_Gammaproteobacteria_Burkholderiales_Burkholderiaceae_Tepidimonas_Tepidimonas-sediminis
RS_GCF_000253115_Bacteria	Proteobacteria_Gammaproteobacteria_Burkholderiales_Burkholderiaceae_Thiomonas_Thiomonas-arsenitoxydans
RS_GCF_001418255_Bacteria	Proteobacteria_Gammaproteobacteria_Burkholderiales_Burkholderiaceae_Thiomonas_Thiomonas-bhubaneswarensis
RS_GCF_900088825_Bacteria	Proteobacteria_Gammaproteobacteria_Burkholderiales_Burkholderiaceae_Thiomonas_Thiomonas-delicata
RS_GCF_002028405_Bacteria	Proteobacteria_Gammaproteobacteria_Burkholderiales_Burkholderiaceae_Thiomonas_Thiomonas-intermedia
RS_GCF_000377645_Bacteria	Proteobacteria_Gammaproteobacteria_Burkholderiales_Burkholderiaceae_Thiomonas_Thiomonas-sp000377645
RS_GCF_000733775_Bacteria	Proteobacteria_Gammaproteobacteria_Burkholderiales_Burkholderiaceae_Thiomonas_Thiomonas-sp000733775
GB_GCA_013044035_Bacteria	Proteobacteria_Gammaproteobacteria_Burkholderiales_Burkholderiaceae_Thiomonas_Thiomonas-sp013044035
GB_GCA_016936875_Bacteria	Proteobacteria_Gammaproteobacteria_Burkholderiales_Burkholderiaceae_Thiomonas_Thiomonas-sp016936875
RS_GCF_900089495_Bacteria	Proteobacteria_Gammaproteobacteria_Burkholderiales_Burkholderiaceae_Thiomonas_Thiomonas-sp900089495
RS_GCF_003843835_Bacteria	Proteobacteria_Gammaproteobacteria_Burkholderiales_Burkholderiaceae_Tibeticola_Tibeticola-sediminis
GB_GCA_013693755_Bacteria	Proteobacteria_Gammaproteobacteria_Burkholderiales_Burkholderiaceae_Tibeticola_Tibeticola-sp013693755
GB_GCA_002344885_Bacteria	Proteobacteria_Gammaproteobacteria_Burkholderiales_Burkholderiaceae_UBA2334_UBA2334-sp002344885
GB_GCA_013823635_Bacteria	Proteobacteria_Gammaproteobacteria_Burkholderiales_Burkholderiaceae_UBA2334_UBA2334-sp013823635
GB_GCA_903928495_Bacteria	Proteobacteria_Gammaproteobacteria_Burkholderiales_Burkholderiaceae_UBA2334_UBA2334-sp903928495
GB_GCA_009646425_Bacteria	Proteobacteria_Gammaproteobacteria_Burkholderiales_Burkholderiaceae_UBA2463_UBA2463-sp009646425
GB_GCA_016868255_Bacteria	Proteobacteria_Gammaproteobacteria_Burkholderiales_Burkholderiaceae_UBA2463_UBA2463-sp016868255
GB_GCA_016868305_Bacteria	Proteobacteria_Gammaproteobacteria_Burkholderiales_Burkholderiaceae_UBA2463_UBA2463-sp016868305
GB_GCA_018401615_Bacteria	Proteobacteria_Gammaproteobacteria_Burkholderiales_Burkholderiaceae_UBA2463_UBA2463-sp018401615
GB_GCA_018402635_Bacteria	Proteobacteria_Gammaproteobacteria_Burkholderiales_Burkholderiaceae_UBA2463_UBA2463-sp018402635
GB_GCA_002359635_Bacteria	Proteobacteria_Gammaproteobacteria_Burkholderiales_Burkholderiaceae_UBA3064_UBA3064-sp002359635
GB_GCA_016868095_Bacteria	Proteobacteria_Gammaproteobacteria_Burkholderiales_Burkholderiaceae_UBA3064_UBA3064-sp016868095
GB_GCA_016868175_Bacteria	Proteobacteria_Gammaproteobacteria_Burkholderiales_Burkholderiaceae_UBA3064_UBA3064-sp016868175
GB_GCA_009924525_Bacteria	Proteobacteria_Gammaproteobacteria_Burkholderiales_Burkholderiaceae_UBA954_UBA954-sp009924525
GB_GCA_018882785_Bacteria	Proteobacteria_Gammaproteobacteria_Burkholderiales_Burkholderiaceae_UBA954_UBA954-sp018882785
GB_GCA_018882795_Bacteria	Proteobacteria_Gammaproteobacteria_Burkholderiales_Burkholderiaceae_UBA954_UBA954-sp018882795
GB_GCA_018970545_Bacteria	Proteobacteria_Gammaproteobacteria_Burkholderiales_Burkholderiaceae_UBA954_UBA954-sp018970545
RS_GCF_014636315_Bacteria	Proteobacteria_Gammaproteobacteria_Burkholderiales_Burkholderiaceae_Undibacterium_Undibacterium-terreum
RS_GCF_001591345_Bacteria	Proteobacteria_Gammaproteobacteria_Burkholderiales_Burkholderiaceae_Variovorax_Variovorax-boronicumulans
RS_GCF_009498455_Bacteria	Proteobacteria_Gammaproteobacteria_Burkholderiales_Burkholderiaceae_Variovorax_Variovorax-paradoxus_H
RS_GCF_001426505_Bacteria	Proteobacteria_Gammaproteobacteria_Burkholderiales_Burkholderiaceae_Variovorax_Variovorax-sp001426505
RS_GCF_001541225_Bacteria	Proteobacteria_Gammaproteobacteria_Burkholderiales_Burkholderiaceae_Variovorax_Variovorax-sp001541225
RS_GCF_002754375_Bacteria	Proteobacteria_Gammaproteobacteria_Burkholderiales_Burkholderiaceae_Variovorax_Variovorax-sp002754375
RS_GCF_003852515_Bacteria	Proteobacteria_Gammaproteobacteria_Burkholderiales_Burkholderiaceae_Variovorax_Variovorax-sp003852515
RS_GCF_014302995_Bacteria	Proteobacteria_Gammaproteobacteria_Burkholderiales_Burkholderiaceae_Variovorax_Variovorax-sp014302995
GB_GCA_016082275_Bacteria	Proteobacteria_Gammaproteobacteria_Burkholderiales_Burkholderiaceae_Variovorax_Variovorax-sp016082275
GB_GCA_018820395_Bacteria	Proteobacteria_Gammaproteobacteria_Burkholderiales_Burkholderiaceae_Variovorax_Variovorax-sp018820395
RS_GCF_900100965_Bacteria	Proteobacteria_Gammaproteobacteria_Burkholderiales_Burkholderiaceae_Variovorax_Variovorax-sp900100965
RS_GCF_016806145_Bacteria	Proteobacteria_Gammaproteobacteria_Burkholderiales_Burkholderiaceae_Variovorax_Variovorax-sp900115375
RS_GCF_002930615_Bacteria	Proteobacteria_Gammaproteobacteria_Burkholderiales_Burkholderiaceae_Zhizhongheella_Zhizhongheella-caldifontis
RS_GCF_009746125_Bacteria	Proteobacteria_Gammaproteobacteria_Burkholderiales_Casimicrobiaceae_Casimicrobium_Casimicrobium-huifangae
GB_GCA_004293675_Bacteria	Proteobacteria_Gammaproteobacteria_Burkholderiales_Casimicrobiaceae_Casimicrobium_Casimicrobium-sp004293675
GB_GCA_013298145_Bacteria	Proteobacteria_Gammaproteobacteria_Burkholderiales_Casimicrobiaceae_Casimicrobium_Casimicrobium-sp004294365
GB_GCA_013298695_Bacteria	Proteobacteria_Gammaproteobacteria_Burkholderiales_Casimicrobiaceae_Casimicrobium_Casimicrobium-sp013298695
GB_GCA_013298765_Bacteria	Proteobacteria_Gammaproteobacteria_Burkholderiales_Casimicrobiaceae_Casimicrobium_Casimicrobium-sp013298765
GB_GCA_016790165_Bacteria	Proteobacteria_Gammaproteobacteria_Burkholderiales_Casimicrobiaceae_Casimicrobium_Casimicrobium-sp016790165
GB_GCA_017989135_Bacteria	Proteobacteria_Gammaproteobacteria_Burkholderiales_Casimicrobiaceae_Casimicrobium_Casimicrobium-sp017989135
GB_GCA_018241765_Bacteria	Proteobacteria_Gammaproteobacteria_Burkholderiales_Casimicrobiaceae_Casimicrobium_Casimicrobium-sp018241765
GB_GCA_016861105_Bacteria	Proteobacteria_Gammaproteobacteria_Burkholderiales_Casimicrobiaceae_VBCG01_VBCG01-sp016861105
GB_GCA_018241745_Bacteria	Proteobacteria_Gammaproteobacteria_Burkholderiales_Casimicrobiaceae_VBCG01_VBCG01-sp018241745
RS_GCF_003226565_Bacteria	Proteobacteria_Gammaproteobacteria_Burkholderiales_Rhodocyclaceae_Azoarcus_C_Azoarcus_C-communis
RS_GCF_003111645_Bacteria	Proteobacteria_Gammaproteobacteria_Burkholderiales_Rhodocyclaceae_Azoarcus_C_Azoarcus_C-communis_A
RS_GCF_003111665_Bacteria	Proteobacteria_Gammaproteobacteria_Burkholderiales_Rhodocyclaceae_Azoarcus_C_Azoarcus_C-communis_B
RS_GCF_018122735_Bacteria	Proteobacteria_Gammaproteobacteria_Burkholderiales_Rhodocyclaceae_Azoarcus_C_Azoarcus_C-sp018122735
RS_GCF_002872475_Bacteria	Proteobacteria_Gammaproteobacteria_Burkholderiales_Rhodocyclaceae_Azoarcus_D_Azoarcus_D-pumilus
GB_GCA_013911595_Bacteria	Proteobacteria_Gammaproteobacteria_Burkholderiales_Rhodocyclaceae_Azoarcus_D_Azoarcus_D-sp013911595
RS_GCF_009800965_Bacteria	Proteobacteria_Gammaproteobacteria_Burkholderiales_Rhodocyclaceae_Azoarcus_E_Azoarcus_E-halotolerans
RS_GCF_000519045_Bacteria	Proteobacteria_Gammaproteobacteria_Burkholderiales_Rhodocyclaceae_Azonexus_Azonexus-agitatus
RS_GCF_000012425_Bacteria	Proteobacteria_Gammaproteobacteria_Burkholderiales_Rhodocyclaceae_Azonexus_Azonexus-aromaticus_A
GB_GCA_017848965_Bacteria	Proteobacteria_Gammaproteobacteria_Burkholderiales_Rhodocyclaceae_Azonexus_Azonexus-aromaticus_B
RS_GCF_001551835_Bacteria	Proteobacteria_Gammaproteobacteria_Burkholderiales_Rhodocyclaceae_Azonexus_Azonexus-denitrificans
RS_GCF_003634965_Bacteria	Proteobacteria_Gammaproteobacteria_Burkholderiales_Rhodocyclaceae_Azonexus_Azonexus-fungiphilus
RS_GCF_009469765_Bacteria	Proteobacteria_Gammaproteobacteria_Burkholderiales_Rhodocyclaceae_Azonexus_Azonexus-hortensis
RS_GCF_000429605_Bacteria	Proteobacteria_Gammaproteobacteria_Burkholderiales_Rhodocyclaceae_Azonexus_Azonexus-hydrophilus
RS_GCF_001956855_Bacteria	Proteobacteria_Gammaproteobacteria_Burkholderiales_Rhodocyclaceae_Azonexus_Azonexus-hydrophilus_A
GB_GCA_002345845_Bacteria	Proteobacteria_Gammaproteobacteria_Burkholderiales_Rhodocyclaceae_Azonexus_Azonexus-sp002345845
GB_GCA_002425245_Bacteria	Proteobacteria_Gammaproteobacteria_Burkholderiales_Rhodocyclaceae_Azonexus_Azonexus-sp002425245
GB_GCA_002440665_Bacteria	Proteobacteria_Gammaproteobacteria_Burkholderiales_Rhodocyclaceae_Azonexus_Azonexus-sp002440665
GB_GCA_002470165_Bacteria	Proteobacteria_Gammaproteobacteria_Burkholderiales_Rhodocyclaceae_Azonexus_Azonexus-sp002470165
GB_GCA_002840765_Bacteria	Proteobacteria_Gammaproteobacteria_Burkholderiales_Rhodocyclaceae_Azonexus_Azonexus-sp002840765
GB_GCA_002840785_Bacteria	Proteobacteria_Gammaproteobacteria_Burkholderiales_Rhodocyclaceae_Azonexus_Azonexus-sp002840785
GB_GCA_002842345_Bacteria	Proteobacteria_Gammaproteobacteria_Burkholderiales_Rhodocyclaceae_Azonexus_Azonexus-sp002842345
RS_GCF_003441615_Bacteria	Proteobacteria_Gammaproteobacteria_Burkholderiales_Rhodocyclaceae_Azonexus_Azonexus-sp003441615
GB_GCA_004379165_Bacteria	Proteobacteria_Gammaproteobacteria_Burkholderiales_Rhodocyclaceae_Azonexus_Azonexus-sp004379165
RS_GCF_008711155_Bacteria	Proteobacteria_Gammaproteobacteria_Burkholderiales_Rhodocyclaceae_Azonexus_Azonexus-sp008711155
GB_GCA_008933675_Bacteria	Proteobacteria_Gammaproteobacteria_Burkholderiales_Rhodocyclaceae_Azonexus_Azonexus-sp008933675
RS_GCF_009469585_Bacteria	Proteobacteria_Gammaproteobacteria_Burkholderiales_Rhodocyclaceae_Azonexus_Azonexus-sp009469585
RS_GCF_009469615_Bacteria	Proteobacteria_Gammaproteobacteria_Burkholderiales_Rhodocyclaceae_Azonexus_Azonexus-sp009469615
GB_GCA_013335535_Bacteria	Proteobacteria_Gammaproteobacteria_Burkholderiales_Rhodocyclaceae_Azonexus_Azonexus-sp013335535
GB_GCA_013363835_Bacteria	Proteobacteria_Gammaproteobacteria_Burkholderiales_Rhodocyclaceae_Azonexus_Azonexus-sp013363835
GB_GCA_016705475_Bacteria	Proteobacteria_Gammaproteobacteria_Burkholderiales_Rhodocyclaceae_Azonexus_Azonexus-sp016705475
GB_GCA_016709495_Bacteria	Proteobacteria_Gammaproteobacteria_Burkholderiales_Rhodocyclaceae_Azonexus_Azonexus-sp016709495
GB_GCA_016709965_Bacteria	Proteobacteria_Gammaproteobacteria_Burkholderiales_Rhodocyclaceae_Azonexus_Azonexus-sp016709965
GB_GCA_016790815_Bacteria	Proteobacteria_Gammaproteobacteria_Burkholderiales_Rhodocyclaceae_Azonexus_Azonexus-sp016790815
GB_GCA_016791065_Bacteria	Proteobacteria_Gammaproteobacteria_Burkholderiales_Rhodocyclaceae_Azonexus_Azonexus-sp016791065
RS_GCF_016864195_Bacteria	Proteobacteria_Gammaproteobacteria_Burkholderiales_Rhodocyclaceae_Azonexus_Azonexus-sp016864195
GB_GCA_017983755_Bacteria	Proteobacteria_Gammaproteobacteria_Burkholderiales_Rhodocyclaceae_Azonexus_Azonexus-sp017983755
GB_GCA_018261895_Bacteria	Proteobacteria_Gammaproteobacteria_Burkholderiales_Rhodocyclaceae_Azonexus_Azonexus-sp018261895
GB_GCA_018262195_Bacteria	Proteobacteria_Gammaproteobacteria_Burkholderiales_Rhodocyclaceae_Azonexus_Azonexus-sp018262195
GB_GCA_018780195_Bacteria	Proteobacteria_Gammaproteobacteria_Burkholderiales_Rhodocyclaceae_Azonexus_Azonexus-sp018780195
GB_GCA_018828385_Bacteria	Proteobacteria_Gammaproteobacteria_Burkholderiales_Rhodocyclaceae_Azonexus_Azonexus-sp018828385
RS_GCF_010983895_Bacteria	Proteobacteria_Gammaproteobacteria_Burkholderiales_Rhodocyclaceae_Denitromonas_Denitromonas-sp010983895
GB_GCA_017309585_Bacteria	Proteobacteria_Gammaproteobacteria_Burkholderiales_Rhodocyclaceae_Denitromonas_Denitromonas-sp017309585
RS_GCF_000527135_Bacteria	Proteobacteria_Gammaproteobacteria_Burkholderiales_Rhodocyclaceae_Methyloversatilis_Methyloversatilis-discipulorum
RS_GCF_000385375_Bacteria	Proteobacteria_Gammaproteobacteria_Burkholderiales_Rhodocyclaceae_Methyloversatilis_Methyloversatilis-discipulorum_A
RS_GCF_001713355_Bacteria	Proteobacteria_Gammaproteobacteria_Burkholderiales_Rhodocyclaceae_Methyloversatilis_Methyloversatilis-sp001713355
GB_GCA_016791045_Bacteria	Proteobacteria_Gammaproteobacteria_Burkholderiales_Rhodocyclaceae_Methyloversatilis_Methyloversatilis-sp016791045
GB_GCA_018824085_Bacteria	Proteobacteria_Gammaproteobacteria_Burkholderiales_Rhodocyclaceae_Methyloversatilis_Methyloversatilis-sp018824085
RS_GCF_000372885_Bacteria	Proteobacteria_Gammaproteobacteria_Burkholderiales_Rhodocyclaceae_Methyloversatilis_Methyloversatilis-thermotolerans
RS_GCF_008274805_Bacteria	Proteobacteria_Gammaproteobacteria_Burkholderiales_Rhodocyclaceae_Oryzomicrobium_Oryzomicrobium-terrae
RS_GCF_003034845_Bacteria	Proteobacteria_Gammaproteobacteria_Burkholderiales_Rhodocyclaceae_Thauera_A_Thauera_A-sp003034845
RS_GCF_001051995_Bacteria	Proteobacteria_Gammaproteobacteria_Burkholderiales_Rhodocyclaceae_Thauera_Thauera-humireducens
RS_GCF_001696715_Bacteria	Proteobacteria_Gammaproteobacteria_Burkholderiales_Rhodocyclaceae_Thauera_Thauera-phenolivorans
RS_GCF_002245655_Bacteria	Proteobacteria_Gammaproteobacteria_Burkholderiales_Rhodocyclaceae_Thauera_Thauera-propionica
GB_GCA_017997795_Bacteria	Proteobacteria_Gammaproteobacteria_Burkholderiales_Rhodocyclaceae_Thauera_Thauera-sp017997795
RS_GCF_000443165_Bacteria	Proteobacteria_Gammaproteobacteria_Burkholderiales_Rhodocyclaceae_Thauera_Thauera-terpenica
GB_GCA_016790005_Bacteria	Proteobacteria_Gammaproteobacteria_Burkholderiales_Rhodocyclaceae_UBA2357_UBA2357-sp016790005
GB_GCA_903895005_Bacteria	Proteobacteria_Gammaproteobacteria_Burkholderiales_SG8-39_CAITSH01_CAITSH01-sp903895005
GB_GCA_016210745_Bacteria	Proteobacteria_Gammaproteobacteria_Burkholderiales_SG8-39_JACQTO01_JACQTO01-sp016210745
GB_GCA_009693345_Bacteria	Proteobacteria_Gammaproteobacteria_Burkholderiales_SG8-39_RBG-16-66-20_RBG-16-66-20-sp009693345
GB_GCA_016713125_Bacteria	Proteobacteria_Gammaproteobacteria_Burkholderiales_SG8-39_SZAS-79_SZAS-79-sp016713125
GB_GCA_001464815_Bacteria	Proteobacteria_Gammaproteobacteria_Burkholderiales_SG8-41_Ga0077527_Ga0077527-sp001464815
GB_GCA_016709665_Bacteria	Proteobacteria_Gammaproteobacteria_Burkholderiales_Usitatibacteraceae_FEB-7_FEB-7-sp016709665
GB_GCA_016711875_Bacteria	Proteobacteria_Gammaproteobacteria_Burkholderiales_Usitatibacteraceae_FEB-7_FEB-7-sp016711875
GB_GCA_016791265_Bacteria	Proteobacteria_Gammaproteobacteria_Burkholderiales_Usitatibacteraceae_JAEUMY01_JAEUMY01-sp016791265
GB_GCA_016790625_Bacteria	Proteobacteria_Gammaproteobacteria_Burkholderiales_Usitatibacteraceae_JAEUMZ01_JAEUMZ01-sp016790625
GB_GCA_016790765_Bacteria	Proteobacteria_Gammaproteobacteria_Burkholderiales_Usitatibacteraceae_JAEUMZ01_JAEUMZ01-sp016790765
GB_GCA_001602455_Bacteria	Proteobacteria_Gammaproteobacteria_Burkholderiales_Usitatibacteraceae_UKL13-2_UKL13-2-sp001602455
RS_GCF_013003985_Bacteria	Proteobacteria_Gammaproteobacteria_Burkholderiales_Usitatibacteraceae_Usitatibacter_Usitatibacter-palustris
RS_GCF_013003965_Bacteria	Proteobacteria_Gammaproteobacteria_Burkholderiales_Usitatibacteraceae_Usitatibacter_Usitatibacter-rugosus
GB_GCA_001953215_Bacteria	Proteobacteria_Gammaproteobacteria_Burkholderiales_Usitatibacteraceae_Usitatibacter_Usitatibacter-sp001953215
GB_GCA_017880705_Bacteria	Proteobacteria_Gammaproteobacteria_Burkholderiales_Usitatibacteraceae_Usitatibacter_Usitatibacter-sp017880705
GB_GCA_903825645_Bacteria	Proteobacteria_Gammaproteobacteria_Ga0077536_Ga0077536_CAIKBL01_CAIKBL01-sp903825645
GB_GCA_001730015_Bacteria	Proteobacteria_Gammaproteobacteria_Granulosicoccales_Granulosicoccaceae_GCA-1730015_GCA-1730015-sp001730015
GB_GCA_013002205_Bacteria	Proteobacteria_Gammaproteobacteria_Granulosicoccales_Granulosicoccaceae_Granulosicoccus_Granulosicoccus-sp013002205
GB_GCA_012103455_Bacteria	Proteobacteria_Gammaproteobacteria_HK1_HK1_WLWT01_WLWT01-sp012103455
RS_GCF_009910365_Bacteria	Proteobacteria_Gammaproteobacteria_Pseudomonadales_Halieaceae_Aequoribacter_Aequoribacter-fuscus
RS_GCF_000153125_Bacteria	Proteobacteria_Gammaproteobacteria_Pseudomonadales_Halieaceae_Congregibacter_Congregibacter-litoralis
GB_GCA_000158155_Bacteria	Proteobacteria_Gammaproteobacteria_Pseudomonadales_Halieaceae_Congregibacter_Congregibacter-sp000158155
GB_GCA_018657645_Bacteria	Proteobacteria_Gammaproteobacteria_Pseudomonadales_Halieaceae_Halioglobus_Halioglobus-sp018657645
GB_GCA_002726655_Bacteria	Proteobacteria_Gammaproteobacteria_Pseudomonadales_HTCC2089_GCA-002726655_GCA-002726655-sp002726655
GB_GCA_002389265_Bacteria	Proteobacteria_Gammaproteobacteria_Pseudomonadales_HTCC2089_UBA4582_UBA4582-sp002389265
GB_GCA_012960755_Bacteria	Proteobacteria_Gammaproteobacteria_Pseudomonadales_HTCC2089_UBA4582_UBA4582-sp012960755
GB_GCA_016763855_Bacteria	Proteobacteria_Gammaproteobacteria_Pseudomonadales_HTCC2089_UBA4582_UBA4582-sp016763855
GB_GCA_012961165_Bacteria	Proteobacteria_Gammaproteobacteria_Pseudomonadales_HTCC2089_UBA9659_UBA9659-sp012961165
GB_GCA_016779585_Bacteria	Proteobacteria_Gammaproteobacteria_Pseudomonadales_HTCC2089_UBA9659_UBA9659-sp016779585
GB_GCA_018607685_Bacteria	Proteobacteria_Gammaproteobacteria_Pseudomonadales_HTCC2089_UBA9659_UBA9659-sp018607685
GB_GCA_018656865_Bacteria	Proteobacteria_Gammaproteobacteria_Pseudomonadales_HTCC2089_UBA9659_UBA9659-sp018656865
GB_GCA_018665025_Bacteria	Proteobacteria_Gammaproteobacteria_Pseudomonadales_HTCC2089_UBA9659_UBA9659-sp018665025
GB_GCA_012960535_Bacteria	Proteobacteria_Gammaproteobacteria_Pseudomonadales_HTCC2089_UBA9926_UBA9926-sp012960535
GB_GCA_013151645_Bacteria	Proteobacteria_Gammaproteobacteria_Woeseiales_Woeseiaceae_JAADHU01_JAADHU01-sp013151645
GB_GCA_004357475_Bacteria	Proteobacteria_Gammaproteobacteria_Woeseiales_Woeseiaceae_SZUA-117_SZUA-117-sp004357475
GB_GCA_013042835_Bacteria	Proteobacteria_Gammaproteobacteria_Xanthomonadales_SZUA-36_SZUA-36_SZUA-36-sp013042835
GB_GCA_003232965_Bacteria	Proteobacteria_Gammaproteobacteria_Xanthomonadales_SZUA-36_SZUA-51_SZUA-51-sp003232965
GB_GCA_015222805_Bacteria	Proteobacteria_Gammaproteobacteria_Xanthomonadales_SZUA-36_SZUA-51_SZUA-51-sp015222805

## Sheet: Truncated Sox, no SoxR
Species containing the truncated Sox system without SoxR
Accession_Prokaryotic domain	GTDB taxonomy_phylum_class_order_family_genus_species	RS: NCBI RefSeq database
RS_GCF_000008625_Bacteria	Aquificota_Aquificae_Aquificales_Aquificaceae_Aquifex_Aquifex-aeolicus	GB: NCBI GeneBank database
GB_GCA_015661465_Bacteria	Aquificota_Aquificae_Aquificales_Aquificaceae_Aquifex_Aquifex-aeolicus_B
GB_GCA_003978875_Bacteria	Aquificota_Aquificae_Aquificales_Aquificaceae_Aquifex_Aquifex-sp003978875
GB_GCA_013153455_Bacteria	Aquificota_Aquificae_Aquificales_Aquificaceae_Aquifex_Aquifex-sp013153455
GB_GCA_011375045_Bacteria	Aquificota_Aquificae_Aquificales_Aquificaceae_Hydrogenivirga_Hydrogenivirga-aeolica_A
RS_GCF_003664005_Bacteria	Aquificota_Aquificae_Aquificales_Aquificaceae_Hydrogenivirga_Hydrogenivirga-caldilitoris
GB_GCA_013153495_Bacteria	Aquificota_Aquificae_Aquificales_Aquificaceae_Hydrogenivirga_Hydrogenivirga-sp013153495
GB_GCA_015487835_Bacteria	Aquificota_Aquificae_Aquificales_Aquificaceae_Hydrogenivirga_Hydrogenivirga-sp015487835
GB_GCA_015490105_Bacteria	Aquificota_Aquificae_Aquificales_Aquificaceae_Hydrogenivirga_Hydrogenivirga-sp015490105
GB_GCA_015490115_Bacteria	Aquificota_Aquificae_Aquificales_Aquificaceae_Hydrogenivirga_Hydrogenivirga-sp015490115
GB_GCA_015490215_Bacteria	Aquificota_Aquificae_Aquificales_Aquificaceae_Hydrogenivirga_Hydrogenivirga-sp015490215
GB_GCA_015492115_Bacteria	Aquificota_Aquificae_Aquificales_Aquificaceae_Hydrogenivirga_Hydrogenivirga-sp015492115
RS_GCF_900215655_Bacteria	Aquificota_Aquificae_Aquificales_Aquificaceae_Hydrogenobacter_Hydrogenobacter-hydrogenophilus
RS_GCF_000010785_Bacteria	Aquificota_Aquificae_Aquificales_Aquificaceae_Hydrogenobacter_Hydrogenobacter-thermophilus
RS_GCF_900142435_Bacteria	Aquificota_Aquificae_Aquificales_Aquificaceae_Thermocrinis_A_Thermocrinis_A-minervae
RS_GCF_000025605_Bacteria	Aquificota_Aquificae_Aquificales_Aquificaceae_Thermocrinis_Thermocrinis-albus
RS_GCF_000512735_Bacteria	Aquificota_Aquificae_Aquificales_Aquificaceae_Thermocrinis_Thermocrinis-ruber
GB_GCA_011375435_Bacteria	Aquificota_Aquificae_Aquificales_Aquificaceae_Thermocrinis_Thermocrinis-ruber_A
RS_GCF_000702425_Bacteria	Aquificota_Aquificae_Aquificales_Aquificaceae_Thermocrinis_Thermocrinis-sp000702425
GB_GCA_018771605_Bacteria	Aquificota_Aquificae_Aquificales_Aquificaceae_UBA11096_UBA11096-sp003534055
GB_GCA_003696155_Bacteria	Aquificota_Aquificae_Aquificales_Aquificaceae_UBA11096_UBA11096-sp003696155
RS_GCF_011006175_Bacteria	Aquificota_Aquificae_Aquificales_Aquificaceae_UBA11096_UBA11096-sp011006175
GB_GCA_011054805_Bacteria	Aquificota_Aquificae_Aquificales_Aquificaceae_UBA11096_UBA11096-sp011054805
GB_GCA_015487615_Bacteria	Aquificota_Aquificae_Aquificales_Aquificaceae_WFWF01_WFWF01-sp015487615
GB_GCA_015491275_Bacteria	Aquificota_Aquificae_Aquificales_Aquificaceae_WFWF01_WFWF01-sp015491275
GB_GCA_015490155_Bacteria	Aquificota_Aquificae_Aquificales_Aquificaceae_WFYI01_WFYI01-sp015490155
RS_GCF_003688665_Bacteria	Aquificota_Aquificae_Hydrogenothermales_Hydrogenothermaceae_Hydrogenothermus_Hydrogenothermus-marinus
GB_GCA_003978675_Bacteria	Aquificota_Aquificae_Hydrogenothermales_Hydrogenothermaceae_Hydrogenothermus_Hydrogenothermus-sp003978675
GB_GCA_012961365_Bacteria	Aquificota_Aquificae_Hydrogenothermales_Hydrogenothermaceae_Hydrogenothermus_Hydrogenothermus-sp012961365
GB_GCA_015519975_Bacteria	Aquificota_Aquificae_Hydrogenothermales_Hydrogenothermaceae_Hydrogenothermus_Hydrogenothermus-sp015519975
GB_GCA_013153795_Bacteria	Aquificota_Aquificae_Hydrogenothermales_Hydrogenothermaceae_JAADDV01_JAADDV01-sp013153795
GB_GCA_013153635_Bacteria	Aquificota_Aquificae_Hydrogenothermales_Hydrogenothermaceae_JAADDZ01_JAADDZ01-sp013153635
RS_GCF_016617615_Bacteria	Aquificota_Aquificae_Hydrogenothermales_Hydrogenothermaceae_Persephonella_Persephonella-atlantica
RS_GCF_900215515_Bacteria	Aquificota_Aquificae_Hydrogenothermales_Hydrogenothermaceae_Persephonella_Persephonella-hydrogeniphila
RS_GCF_000021565_Bacteria	Aquificota_Aquificae_Hydrogenothermales_Hydrogenothermaceae_Persephonella_Persephonella-marina
RS_GCF_000703085_Bacteria	Aquificota_Aquificae_Hydrogenothermales_Hydrogenothermaceae_Persephonella_Persephonella-sp000703085
GB_GCA_015487465_Bacteria	Aquificota_Aquificae_Hydrogenothermales_Hydrogenothermaceae_Persephonella_Persephonella-sp015487465
RS_GCF_000021545_Bacteria	Aquificota_Aquificae_Hydrogenothermales_Hydrogenothermaceae_Sulfurihydrogenibium_Sulfurihydrogenibium-azorense
RS_GCF_000020325_Bacteria	Aquificota_Aquificae_Hydrogenothermales_Hydrogenothermaceae_Sulfurihydrogenibium_Sulfurihydrogenibium-sp000020325
GB_GCA_002878035_Bacteria	Aquificota_Aquificae_Hydrogenothermales_Hydrogenothermaceae_Sulfurihydrogenibium_Sulfurihydrogenibium-sp002878035
RS_GCF_000619805_Bacteria	Aquificota_Aquificae_Hydrogenothermales_Hydrogenothermaceae_Sulfurihydrogenibium_Sulfurihydrogenibium-subterraneum
RS_GCF_001747405_Bacteria	Bacteroidota_Chlorobia_Chlorobiales_Chlorobiaceae_Chlorobaculum_Chlorobaculum-limnaeum
RS_GCF_000020505_Bacteria	Bacteroidota_Chlorobia_Chlorobiales_Chlorobiaceae_Chlorobaculum_Chlorobaculum-parvum_A
GB_GCA_011372505_Bacteria	Bacteroidota_Chlorobia_Chlorobiales_Chlorobiaceae_Chlorobaculum_Chlorobaculum-parvum_B
GB_GCA_001602925_Bacteria	Bacteroidota_Chlorobia_Chlorobiales_Chlorobiaceae_Chlorobaculum_Chlorobaculum-sp001602925
RS_GCF_004118635_Bacteria	Bacteroidota_Chlorobia_Chlorobiales_Chlorobiaceae_Chlorobaculum_Chlorobaculum-sp004118635
GB_GCA_013334855_Bacteria	Bacteroidota_Chlorobia_Chlorobiales_Chlorobiaceae_Chlorobaculum_Chlorobaculum-sp013334855
GB_GCA_013334925_Bacteria	Bacteroidota_Chlorobia_Chlorobiales_Chlorobiaceae_Chlorobaculum_Chlorobaculum-sp013334925
GB_GCA_013334975_Bacteria	Bacteroidota_Chlorobia_Chlorobiales_Chlorobiaceae_Chlorobaculum_Chlorobaculum-sp013334975
GB_GCA_016931495_Bacteria	Bacteroidota_Chlorobia_Chlorobiales_Chlorobiaceae_Chlorobaculum_Chlorobaculum-sp016931495
GB_GCA_900299075_Bacteria	Bacteroidota_Chlorobia_Chlorobiales_Chlorobiaceae_Chlorobaculum_Chlorobaculum-sp900299075
RS_GCF_000006985_Bacteria	Bacteroidota_Chlorobia_Chlorobiales_Chlorobiaceae_Chlorobaculum_Chlorobaculum-tepidum
RS_GCF_006265165_Bacteria	Bacteroidota_Chlorobia_Chlorobiales_Chlorobiaceae_Chlorobaculum_Chlorobaculum-thiosulfatiphilum
RS_GCF_003182595_Bacteria	Bacteroidota_Chlorobia_Chlorobiales_Chlorobiaceae_Chlorobium_A_Chlorobium_A-marina
GB_GCA_015482705_Bacteria	Bacteroidota_Chlorobia_Chlorobiales_Chlorobiaceae_Chlorobium_A_Chlorobium_A-sp015482705
RS_GCF_000012585_Bacteria	Bacteroidota_Chlorobia_Chlorobiales_Chlorobiaceae_Chlorobium_Chlorobium-chlorochromatii
RS_GCF_000020645_Bacteria	Bacteroidota_Chlorobia_Chlorobiales_Chlorobiaceae_Chlorobium_Chlorobium-phaeoclathratiforme
RS_GCF_000016085_Bacteria	Bacteroidota_Chlorobia_Chlorobiales_Chlorobiaceae_Chlorobium_Chlorobium-phaeovibrioides
GB_GCA_903869365_Bacteria	Bacteroidota_Chlorobia_Chlorobiales_Chlorobiaceae_Chlorobium_Chlorobium-sp903869365
GB_GCA_903874585_Bacteria	Bacteroidota_Chlorobia_Chlorobiales_Chlorobiaceae_Chlorobium_Chlorobium-sp903874585
RS_GCF_014844135_Bacteria	Campylobacterota_Campylobacteria_Campylobacterales_Arcobacteraceae_UBA6211_UBA6211-sp014844135
GB_GCA_015484905_Bacteria	Campylobacterota_Campylobacteria_Campylobacterales_Hydrogenimonadaceae_Hydrogenimonas_Hydrogenimonas-sp015484905
RS_GCF_900115615_Bacteria	Campylobacterota_Campylobacteria_Campylobacterales_Hydrogenimonadaceae_Hydrogenimonas_Hydrogenimonas-thermophila
GB_GCA_015494595_Bacteria	Campylobacterota_Campylobacteria_Campylobacterales_Nitratiruptoraceae_Nitratiruptor_Nitratiruptor-sp015494595
RS_GCF_900176045_Bacteria	Campylobacterota_Campylobacteria_Campylobacterales_Nitratiruptoraceae_Nitratiruptor_Nitratiruptor-tergarcus
GB_GCA_009659925_Bacteria	Campylobacterota_Campylobacteria_Campylobacterales_Nitratiruptoraceae_PUXW01_PUXW01-sp009659925
GB_GCA_016744895_Bacteria	Campylobacterota_Campylobacteria_Campylobacterales_QNZT01_SZUA-1433_SZUA-1433-sp016744895
GB_GCA_016744575_Bacteria	Campylobacterota_Campylobacteria_Campylobacterales_Sulfurimonadaceae_BB26_BB26-sp016744575
GB_GCA_014764025_Bacteria	Campylobacterota_Campylobacteria_Campylobacterales_Sulfurimonadaceae_JACXUD01_JACXUD01-sp014764025
GB_GCA_016938735_Bacteria	Campylobacterota_Campylobacteria_Campylobacterales_Sulfurimonadaceae_JAFGUB01_JAFGUB01-sp016938735
GB_GCA_000830255_Bacteria	Campylobacterota_Campylobacteria_Campylobacterales_Sulfurimonadaceae_PC08-66_PC08-66-sp000830255
RS_GCF_000183725_Bacteria	Campylobacterota_Campylobacteria_Campylobacterales_Sulfurimonadaceae_Sulfuricurvum_Sulfuricurvum-kujiense
GB_GCA_000310245_Bacteria	Campylobacterota_Campylobacteria_Campylobacterales_Sulfurimonadaceae_Sulfuricurvum_Sulfuricurvum-sp000310245
GB_GCA_000747095_Bacteria	Campylobacterota_Campylobacteria_Campylobacterales_Sulfurimonadaceae_Sulfuricurvum_Sulfuricurvum-sp000747095
RS_GCF_004347735_Bacteria	Campylobacterota_Campylobacteria_Campylobacterales_Sulfurimonadaceae_Sulfuricurvum_Sulfuricurvum-sp002327465
GB_GCA_002633015_Bacteria	Campylobacterota_Campylobacteria_Campylobacterales_Sulfurimonadaceae_Sulfuricurvum_Sulfuricurvum-sp002633015
GB_GCA_014764075_Bacteria	Campylobacterota_Campylobacteria_Campylobacterales_Sulfurimonadaceae_Sulfuricurvum_Sulfuricurvum-sp014764075
GB_GCA_016938595_Bacteria	Campylobacterota_Campylobacteria_Campylobacterales_Sulfurimonadaceae_Sulfuricurvum_Sulfuricurvum-sp016938595
RS_GCF_000242915_Bacteria	Campylobacterota_Campylobacteria_Campylobacterales_Sulfurimonadaceae_Sulfurimonas_Sulfurimonas-gotlandica
RS_GCF_000445475_Bacteria	Campylobacterota_Campylobacteria_Campylobacterales_Sulfurimonadaceae_Sulfurimonas_Sulfurimonas-hongkongensis
GB_GCA_002452425_Bacteria	Campylobacterota_Campylobacteria_Campylobacterales_Sulfurimonadaceae_Sulfurimonas_Sulfurimonas-sp002452425
GB_GCA_002733945_Bacteria	Campylobacterota_Campylobacteria_Campylobacterales_Sulfurimonadaceae_Sulfurimonas_Sulfurimonas-sp002733945
GB_GCA_014859695_Bacteria	Campylobacterota_Campylobacteria_Campylobacterales_Sulfurimonadaceae_Sulfurimonas_Sulfurimonas-sp014859695
RS_GCF_014905095_Bacteria	Campylobacterota_Campylobacteria_Campylobacterales_Sulfurimonadaceae_Sulfurimonas_Sulfurimonas-sp014905095
GB_GCA_015663215_Bacteria	Campylobacterota_Campylobacteria_Campylobacterales_Sulfurimonadaceae_Sulfurimonas_Sulfurimonas-sp015663215
GB_GCA_016744115_Bacteria	Campylobacterota_Campylobacteria_Campylobacterales_Sulfurimonadaceae_Sulfurimonas_Sulfurimonas-sp016744115
GB_GCA_016938175_Bacteria	Campylobacterota_Campylobacteria_Campylobacterales_Sulfurimonadaceae_Sulfurimonas_Sulfurimonas-sp016938175
GB_GCA_018825665_Bacteria	Campylobacterota_Campylobacteria_Campylobacterales_Sulfurimonadaceae_Sulfurimonas_Sulfurimonas-sp018825665
RS_GCF_014931715_Bacteria	Campylobacterota_Campylobacteria_Campylobacterales_Sulfurovaceae_Sulfurovum_Sulfurovum-indicum
RS_GCF_000296775_Bacteria	Campylobacterota_Campylobacteria_Campylobacterales_Sulfurovaceae_Sulfurovum_Sulfurovum-sp000296775
GB_GCA_003978375_Bacteria	Campylobacterota_Campylobacteria_Campylobacterales_Sulfurovaceae_Sulfurovum_Sulfurovum-sp003978375
GB_GCA_013607775_Bacteria	Campylobacterota_Campylobacteria_Campylobacterales_Sulfurovaceae_Sulfurovum_Sulfurovum-sp013607775
GB_GCA_015490315_Bacteria	Campylobacterota_Campylobacteria_Campylobacterales_Sulfurovaceae_Sulfurovum_Sulfurovum-sp015490315
GB_GCA_015661795_Bacteria	Campylobacterota_Campylobacteria_Campylobacterales_Sulfurovaceae_Sulfurovum_Sulfurovum-sp015661795
GB_GCA_015488875_Bacteria	Campylobacterota_Campylobacteria_Campylobacterales_Sulfurovaceae_SZUA-451_SZUA-451-sp015488875
GB_GCA_016744315_Bacteria	Campylobacterota_Campylobacteria_Campylobacterales_Sulfurovaceae_SZUA-451_SZUA-451-sp016744315
GB_GCA_902727895_Bacteria	Campylobacterota_Campylobacteria_Campylobacterales_Sulfurovaceae_UBA1140_UBA1140-sp902727895
GB_GCA_902727915_Bacteria	Campylobacterota_Campylobacteria_Campylobacterales_Sulfurovaceae_UBA1140_UBA1140-sp902727915
GB_GCA_902727935_Bacteria	Campylobacterota_Campylobacteria_Campylobacterales_Sulfurovaceae_UBA1140_UBA1140-sp902727935
GB_GCA_003250175_Bacteria	Campylobacterota_Campylobacteria_Campylobacterales_SZUA-545_SZUA-545_SZUA-545-sp003250175
GB_GCA_002428055_Bacteria	Campylobacterota_Campylobacteria_Campylobacterales_UBA6016_UBA6016_UBA6016-sp002428055
GB_GCA_013151235_Bacteria	CG2-30-53-67_CG2-30-53-67_CG2-30-53-67_CG2-30-53-67_JAADIO01_JAADIO01-sp013151235
RS_GCF_003574355_Bacteria	Deinococcota_Deinococci_Deinococcales_Thermaceae_Meiothermus_Meiothermus-granaticius
GB_GCA_001311545_Bacteria	Deinococcota_Deinococci_Deinococcales_Thermaceae_Thermus_Thermus-kawarayensis
GB_GCA_002897615_Bacteria	Desulfobacterota_Desulfobulbia_Desulfobulbales_Desulfobulbaceae_BMS3Abin13_BMS3Abin13-sp002897615
GB_GCA_013151365_Bacteria	Desulfobacterota_Desulfobulbia_Desulfobulbales_Desulfobulbaceae_BMS3Abin13_BMS3Abin13-sp013151365
GB_GCA_015484845_Bacteria	Desulfobacterota_Desulfobulbia_Desulfobulbales_Desulfobulbaceae_DRKI01_DRKI01-sp015484845
GB_GCA_011051825_Bacteria	Desulfobacterota_Desulfobulbia_Desulfobulbales_Desulfobulbaceae_DRLX01_DRLX01-sp011051825
GB_GCA_011330685_Bacteria	Desulfobacterota_Desulfobulbia_Desulfobulbales_Desulfurivibrionaceae_JAADIV01_JAADIV01-sp011330685
GB_GCA_013151175_Bacteria	Desulfobacterota_Desulfobulbia_Desulfobulbales_Desulfurivibrionaceae_JAADIV01_JAADIV01-sp013151175
GB_GCA_003220335_Bacteria	Methylomirabilota_Methylomirabilia_Rokubacteriales_CSP1-6_AR12_AR12-sp003220335
GB_GCA_003220475_Bacteria	Methylomirabilota_Methylomirabilia_Rokubacteriales_CSP1-6_AR12_AR12-sp003220475
GB_GCA_003220495_Bacteria	Methylomirabilota_Methylomirabilia_Rokubacteriales_CSP1-6_AR31_AR31-sp003220495
GB_GCA_003221515_Bacteria	Methylomirabilota_Methylomirabilia_Rokubacteriales_CSP1-6_AR31_AR31-sp003221515
GB_GCA_003221615_Bacteria	Methylomirabilota_Methylomirabilia_Rokubacteriales_CSP1-6_AR31_AR31-sp003221615
GB_GCA_003221635_Bacteria	Methylomirabilota_Methylomirabilia_Rokubacteriales_CSP1-6_AR31_AR31-sp003221635
GB_GCA_016179165_Bacteria	Methylomirabilota_Methylomirabilia_Rokubacteriales_CSP1-6_AR37_AR37-sp016179165
GB_GCA_003220265_Bacteria	Methylomirabilota_Methylomirabilia_Rokubacteriales_CSP1-6_AR5_AR5-sp003220265
GB_GCA_003220195_Bacteria	Methylomirabilota_Methylomirabilia_Rokubacteriales_CSP1-6_AR8_AR8-sp003220195
GB_GCA_001443385_Bacteria	Methylomirabilota_Methylomirabilia_Rokubacteriales_CSP1-6_CSP1-6_CSP1-6-sp001443385
GB_GCA_016179925_Bacteria	Methylomirabilota_Methylomirabilia_Rokubacteriales_CSP1-6_JACPCG01_JACPCG01-sp016179925
GB_GCA_001788395_Bacteria	Methylomirabilota_Methylomirabilia_Rokubacteriales_CSP1-6_UBA12499_UBA12499-sp001788395
GB_GCA_001788415_Bacteria	Methylomirabilota_Methylomirabilia_Rokubacteriales_CSP1-6_UBA12499_UBA12499-sp001788415
GB_GCA_016188005_Bacteria	Methylomirabilota_Methylomirabilia_Rokubacteriales_CSP1-6_UBA12499_UBA12499-sp016188005
GB_GCA_016866775_Bacteria	Methylomirabilota_Methylomirabilia_Rokubacteriales_CSP1-6_VGLJ01_VGLJ01-sp016866775
GB_GCA_016208975_Bacteria	Nitrospinota_UBA7883_UBA7883_JACRLM01_JACQXA01_JACQXA01-sp016208975
GB_GCA_001803815_Bacteria	Nitrospirota_9FT-COMBO-42-15_9FT-COMBO-42-15_9FT-COMBO-42-15_9FT-COMBO-42-15_9FT-COMBO-42-15-sp001803815
GB_GCA_016217625_Bacteria	Nitrospirota_RBG-16-64-22_JACRHK01_JACRHK01_JACRHK01_JACRHK01-sp016217625
GB_GCA_002897855_Bacteria	Nitrospirota_Thermodesulfovibrionia_Thermodesulfovibrionales_BMS3Bbin05_BMS3Bbin05_BMS3Bbin05-sp002897855
GB_GCA_002897935_Bacteria	Nitrospirota_Thermodesulfovibrionia_Thermodesulfovibrionales_JdFR-85_BMS3Abin08_BMS3Abin08-sp002897935
GB_GCA_015485235_Bacteria	Nitrospirota_Thermodesulfovibrionia_Thermodesulfovibrionales_JdFR-85_BMS3Abin08_BMS3Abin08-sp015485235
GB_GCA_013151785_Bacteria	Nitrospirota_Thermodesulfovibrionia_Thermodesulfovibrionales_JdFR-85_JAADHP01_JAADHP01-sp013151785
GB_GCA_015484595_Bacteria	Nitrospirota_Thermodesulfovibrionia_Thermodesulfovibrionales_JdFR-85_JAADIE01_JAADIE01-sp015484595
GB_GCA_014874185_Bacteria	Nitrospirota_Thermodesulfovibrionia_Thermodesulfovibrionales_JdFR-88_JACWAF01_JACWAF01-sp014874185
GB_GCA_900696535_Bacteria	Planctomycetota_Phycisphaerae_UBA1845_Fen-1342_CAADGM01_CAADGM01-sp900696535
GB_GCA_900696465_Bacteria	Planctomycetota_Phycisphaerae_UBA1845_UTPLA1_UTPLA1_UTPLA1-sp900696465
RS_GCF_000745835_Bacteria	Proteobacteria_Alphaproteobacteria_Acetobacterales_Acetobacteraceae_Belnapia_Belnapia-moabensis
RS_GCF_900101615_Bacteria	Proteobacteria_Alphaproteobacteria_Acetobacterales_Acetobacteraceae_Belnapia_Belnapia-rosea
RS_GCF_000802185_Bacteria	Proteobacteria_Alphaproteobacteria_Acetobacterales_Acetobacteraceae_Belnapia_Belnapia-sp000802185
RS_GCF_016773205_Bacteria	Proteobacteria_Alphaproteobacteria_Acetobacterales_Acetobacteraceae_Belnapia_Belnapia-sp016773205
RS_GCF_016775475_Bacteria	Proteobacteria_Alphaproteobacteria_Acetobacterales_Acetobacteraceae_Belnapia_Belnapia-sp016775475
GB_GCA_902805545_Bacteria	Proteobacteria_Alphaproteobacteria_Acetobacterales_Acetobacteraceae_Belnapia_Belnapia-sp902805545
GB_GCA_003164305_Bacteria	Proteobacteria_Alphaproteobacteria_Acetobacterales_Acetobacteraceae_BOG-934_BOG-934-sp003164305
GB_GCA_902805645_Bacteria	Proteobacteria_Alphaproteobacteria_Acetobacterales_Acetobacteraceae_CADCTG01_CADCTG01-sp902805645
GB_GCA_903835235_Bacteria	Proteobacteria_Alphaproteobacteria_Acetobacterales_Acetobacteraceae_CAIMOR01_CAIMOR01-sp903835235
GB_GCA_903843125_Bacteria	Proteobacteria_Alphaproteobacteria_Acetobacterales_Acetobacteraceae_CAIMOR01_CAIMOR01-sp903843125
GB_GCA_903932545_Bacteria	Proteobacteria_Alphaproteobacteria_Acetobacterales_Acetobacteraceae_CAIQQQ01_CAIQQQ01-sp903932545
GB_GCA_903896535_Bacteria	Proteobacteria_Alphaproteobacteria_Acetobacterales_Acetobacteraceae_CAITYE01_CAITYE01-sp903896535
GB_GCA_903865895_Bacteria	Proteobacteria_Alphaproteobacteria_Acetobacterales_Acetobacteraceae_CAIYPH01_CAIYPH01-sp903865895
RS_GCF_004761865_Bacteria	Proteobacteria_Alphaproteobacteria_Acetobacterales_Acetobacteraceae_Crenalkalicoccus_Crenalkalicoccus-roseus
RS_GCF_004353985_Bacteria	Proteobacteria_Alphaproteobacteria_Acetobacterales_Acetobacteraceae_Paracraurococcus_Paracraurococcus-ruber
RS_GCF_004355005_Bacteria	Proteobacteria_Alphaproteobacteria_Acetobacterales_Acetobacteraceae_Paracraurococcus_Paracraurococcus-ruber_A
RS_GCF_012163145_Bacteria	Proteobacteria_Alphaproteobacteria_Acetobacterales_Acetobacteraceae_Roseomonas_A_Roseomonas_A-frigidaquae
RS_GCF_900114315_Bacteria	Proteobacteria_Alphaproteobacteria_Acetobacterales_Acetobacteraceae_Roseomonas_A_Roseomonas_A-stagni
GB_GCA_903927465_Bacteria	Proteobacteria_Alphaproteobacteria_Acetobacterales_Acetobacteraceae_Roseomonas_B_Roseomonas_B-sp903927465
RS_GCF_014490445_Bacteria	Proteobacteria_Alphaproteobacteria_Acetobacterales_Acetobacteraceae_Roseomonas_Roseomonas-ludipueritiae
RS_GCF_017654485_Bacteria	Proteobacteria_Alphaproteobacteria_Acetobacterales_Acetobacteraceae_Roseomonas_Roseomonas-sp017654485
RS_GCF_014283215_Bacteria	Proteobacteria_Alphaproteobacteria_Acetobacterales_Acetobacteraceae_Siccirubricoccus_Siccirubricoccus-deserti
GB_GCA_005888515_Bacteria	Proteobacteria_Alphaproteobacteria_ATCC43930_Stellaceae_AP-15_AP-15-sp005888515
GB_GCA_019237135_Bacteria	Proteobacteria_Alphaproteobacteria_ATCC43930_Stellaceae_AP-15_AP-15-sp019237135
GB_GCA_019240125_Bacteria	Proteobacteria_Alphaproteobacteria_ATCC43930_Stellaceae_AP-15_AP-15-sp019240125
GB_GCA_019244535_Bacteria	Proteobacteria_Alphaproteobacteria_ATCC43930_Stellaceae_AP-15_AP-15-sp019244535
RS_GCF_006738645_Bacteria	Proteobacteria_Alphaproteobacteria_ATCC43930_Stellaceae_Stella_Stella-humosa
GB_GCA_006739055_Bacteria	Proteobacteria_Alphaproteobacteria_ATCC43930_Stellaceae_Stella_Stella-vacuolata
GB_GCA_000518365_Bacteria	Proteobacteria_Alphaproteobacteria_ATCC43930_Stellaceae_URHD0088_URHD0088-sp000518365
RS_GCF_003116015_Bacteria	Proteobacteria_Alphaproteobacteria_Azospirillales_Azospirillaceae_Azospirillum_Azospirillum-sp003116015
RS_GCF_017356015_Bacteria	Proteobacteria_Alphaproteobacteria_Azospirillales_Azospirillaceae_Azospirillum_Azospirillum-sp017356015
RS_GCF_017355985_Bacteria	Proteobacteria_Alphaproteobacteria_Azospirillales_Azospirillaceae_Desertibacter_Desertibacter-sp017355985
RS_GCF_000936425_Bacteria	Proteobacteria_Alphaproteobacteria_Azospirillales_Azospirillaceae_Skermanella_Skermanella-aerolata
RS_GCF_008843145_Bacteria	Proteobacteria_Alphaproteobacteria_Azospirillales_Azospirillaceae_Skermanella_Skermanella-pratensis
RS_GCF_000576635_Bacteria	Proteobacteria_Alphaproteobacteria_Azospirillales_Azospirillaceae_Skermanella_Skermanella-stibiiresistens
GB_GCA_002238725_Bacteria	Proteobacteria_Alphaproteobacteria_Bin65_Bin65_Bin65_Bin65-sp002238725
GB_GCA_011523655_Bacteria	Proteobacteria_Alphaproteobacteria_Bin65_Bin65_Bin65_Bin65-sp011523655
GB_GCA_900197615_Bacteria	Proteobacteria_Alphaproteobacteria_Bin65_Bin65_Bin65_Bin65-sp900197615
GB_GCA_005240015_Bacteria	Proteobacteria_Alphaproteobacteria_Bin65_Bin65_SBBV01_SBBV01-sp005240015
GB_GCA_018332375_Bacteria	Proteobacteria_Alphaproteobacteria_BOG-932_BOG-932_TMPK1_TMPK1-sp018332375
GB_GCA_016793165_Bacteria	Proteobacteria_Alphaproteobacteria_CACIAM-22H2_CACIAM-22H2_CAIOSQ01_CAIOSQ01-sp016793165
GB_GCA_903860935_Bacteria	Proteobacteria_Alphaproteobacteria_CACIAM-22H2_CACIAM-22H2_CAIOSQ01_CAIOSQ01-sp903860935
GB_GCA_016195145_Bacteria	Proteobacteria_Alphaproteobacteria_CACIAM-22H2_CACIAM-22H2_JACQAF01_JACQAF01-sp016195145
GB_GCA_016201015_Bacteria	Proteobacteria_Alphaproteobacteria_CACIAM-22H2_CACIAM-22H2_JACQDQ01_JACQDQ01-sp016201015
GB_GCA_016124335_Bacteria	Proteobacteria_Alphaproteobacteria_CACIAM-22H2_CACIAM-22H2_Tagaea_Tagaea-sp016124335
RS_GCF_001557235_Bacteria	Proteobacteria_Alphaproteobacteria_Caulobacterales_Caulobacteraceae_Phenylobacterium_Phenylobacterium-sp001557235
RS_GCF_003576245_Bacteria	Proteobacteria_Alphaproteobacteria_Caulobacterales_Hyphomonadaceae_Henriciella_Henriciella-algicola
RS_GCF_002088975_Bacteria	Proteobacteria_Alphaproteobacteria_Caulobacterales_Hyphomonadaceae_Henriciella_Henriciella-aquimarina
RS_GCF_003576345_Bacteria	Proteobacteria_Alphaproteobacteria_Caulobacterales_Hyphomonadaceae_Henriciella_Henriciella-barbarensis
RS_GCF_002088935_Bacteria	Proteobacteria_Alphaproteobacteria_Caulobacterales_Hyphomonadaceae_Henriciella_Henriciella-litoralis
RS_GCF_000376805_Bacteria	Proteobacteria_Alphaproteobacteria_Caulobacterales_Hyphomonadaceae_Henriciella_Henriciella-marina
RS_GCF_002088945_Bacteria	Proteobacteria_Alphaproteobacteria_Caulobacterales_Hyphomonadaceae_Henriciella_Henriciella-pelagia
RS_GCF_001854405_Bacteria	Proteobacteria_Alphaproteobacteria_Caulobacterales_Hyphomonadaceae_Henriciella_Henriciella-sp001854405
GB_GCA_002733705_Bacteria	Proteobacteria_Alphaproteobacteria_Caulobacterales_Hyphomonadaceae_Henriciella_Henriciella-sp002733705
GB_GCA_012960415_Bacteria	Proteobacteria_Alphaproteobacteria_Caulobacterales_Hyphomonadaceae_Henriciella_Henriciella-sp012960415
GB_GCA_013213785_Bacteria	Proteobacteria_Alphaproteobacteria_Caulobacterales_Hyphomonadaceae_Henriciella_Henriciella-sp013213785
GB_GCA_013213825_Bacteria	Proteobacteria_Alphaproteobacteria_Caulobacterales_Hyphomonadaceae_Henriciella_Henriciella-sp013213825
GB_GCA_013214545_Bacteria	Proteobacteria_Alphaproteobacteria_Caulobacterales_Hyphomonadaceae_Henriciella_Henriciella-sp013214545
GB_GCA_017642885_Bacteria	Proteobacteria_Alphaproteobacteria_Caulobacterales_Hyphomonadaceae_Henriciella_Henriciella-sp017642885
RS_GCF_000685215_Bacteria	Proteobacteria_Alphaproteobacteria_Caulobacterales_Hyphomonadaceae_Hyphomonas_Hyphomonas-jannaschiana
RS_GCF_000685315_Bacteria	Proteobacteria_Alphaproteobacteria_Caulobacterales_Hyphomonadaceae_Hyphomonas_Hyphomonas-polymorpha
RS_GCF_000682735_Bacteria	Proteobacteria_Alphaproteobacteria_Caulobacterales_Hyphomonadaceae_Hyphomonas_Hyphomonas-sp000682735
GB_GCA_002700305_Bacteria	Proteobacteria_Alphaproteobacteria_Caulobacterales_Hyphomonadaceae_Hyphomonas_Hyphomonas-sp002700305
RS_GCF_000420665_Bacteria	Proteobacteria_Alphaproteobacteria_Caulobacterales_Hyphomonadaceae_Ponticaulis_Ponticaulis-koreensis
GB_GCA_002173095_Bacteria	Proteobacteria_Alphaproteobacteria_Caulobacterales_Hyphomonadaceae_Ponticaulis_Ponticaulis-sp002173095
GB_GCA_002338565_Bacteria	Proteobacteria_Alphaproteobacteria_Caulobacterales_Hyphomonadaceae_Ponticaulis_Ponticaulis-sp002338565
GB_GCA_002723155_Bacteria	Proteobacteria_Alphaproteobacteria_Caulobacterales_Hyphomonadaceae_Ponticaulis_Ponticaulis-sp002723155
GB_GCA_009909065_Bacteria	Proteobacteria_Alphaproteobacteria_Caulobacterales_Hyphomonadaceae_UBA5336_UBA5336-sp009909065
RS_GCF_000423185_Bacteria	Proteobacteria_Alphaproteobacteria_DSM-16000_Inquilinaceae_Inquilinus_Inquilinus-limosus
GB_GCA_002482765_Bacteria	Proteobacteria_Alphaproteobacteria_Ferrovibrionales_Ferrovibrionaceae_Ferrovibrio_Ferrovibrio-sp002482765
GB_GCA_018336035_Bacteria	Proteobacteria_Alphaproteobacteria_Ferrovibrionales_Ferrovibrionaceae_Ferrovibrio_Ferrovibrio-sp018336035
RS_GCF_007197755_Bacteria	Proteobacteria_Alphaproteobacteria_Ferrovibrionales_Ferrovibrionaceae_Ferrovibrio_Ferrovibrio-terrae
GB_GCA_002731375_Bacteria	Proteobacteria_Alphaproteobacteria_GCA-2731375_GCA-2731375_GCA-2731375_GCA-2731375-sp002731375
GB_GCA_016776605_Bacteria	Proteobacteria_Alphaproteobacteria_GCA-2731375_GCA-2731375_GCA-2731375_GCA-2731375-sp016776605
RS_GCF_003572205_Bacteria	Proteobacteria_Alphaproteobacteria_Kiloniellales_DSM-21159_Algihabitans_Algihabitans-albus
GB_GCA_006969625_Bacteria	Proteobacteria_Alphaproteobacteria_Kiloniellales_DSM-21159_Algihabitans_Algihabitans-sp006969625
RS_GCF_900177295_Bacteria	Proteobacteria_Alphaproteobacteria_Kiloniellales_DSM-21159_Tistlia_Tistlia-consotensis
GB_GCA_016869145_Bacteria	Proteobacteria_Alphaproteobacteria_MPNO01_VGEU01_VGEU01_VGEU01-sp016869145
RS_GCF_000299935_Bacteria	Proteobacteria_Alphaproteobacteria_Oceanibaculales_Oceanibaculaceae_Oceanibaculum_Oceanibaculum-indicum
RS_GCF_001618175_Bacteria	Proteobacteria_Alphaproteobacteria_Oceanibaculales_Oceanibaculaceae_Oceanibaculum_Oceanibaculum-pacificum
GB_GCA_011524995_Bacteria	Proteobacteria_Alphaproteobacteria_Puniceispirillales_Puniceispirillaceae_UBA685_UBA685-sp011524995
RS_GCF_900167455_Bacteria	Proteobacteria_Alphaproteobacteria_Reyranellales_Reyranellaceae_Reyranella_Reyranella-aerosaccus
GB_GCA_903832005_Bacteria	Proteobacteria_Alphaproteobacteria_Reyranellales_Reyranellaceae_Reyranella_Reyranella-aerosaccus_B
GB_GCA_903915535_Bacteria	Proteobacteria_Alphaproteobacteria_Reyranellales_Reyranellaceae_Reyranella_Reyranella-aerosaccus_C
RS_GCF_000312425_Bacteria	Proteobacteria_Alphaproteobacteria_Reyranellales_Reyranellaceae_Reyranella_Reyranella-massiliensis
RS_GCF_007992495_Bacteria	Proteobacteria_Alphaproteobacteria_Reyranellales_Reyranellaceae_Reyranella_Reyranella-soli
GB_GCA_001557035_Bacteria	Proteobacteria_Alphaproteobacteria_Reyranellales_Reyranellaceae_Reyranella_Reyranella-sp001557035
GB_GCA_001897995_Bacteria	Proteobacteria_Alphaproteobacteria_Reyranellales_Reyranellaceae_Reyranella_Reyranella-sp001897995
GB_GCA_002281855_Bacteria	Proteobacteria_Alphaproteobacteria_Reyranellales_Reyranellaceae_Reyranella_Reyranella-sp002281855
GB_GCA_003153415_Bacteria	Proteobacteria_Alphaproteobacteria_Reyranellales_Reyranellaceae_Reyranella_Reyranella-sp003153415
GB_GCA_004296935_Bacteria	Proteobacteria_Alphaproteobacteria_Reyranellales_Reyranellaceae_Reyranella_Reyranella-sp004296935
GB_GCA_004297265_Bacteria	Proteobacteria_Alphaproteobacteria_Reyranellales_Reyranellaceae_Reyranella_Reyranella-sp004297265
GB_GCA_004297405_Bacteria	Proteobacteria_Alphaproteobacteria_Reyranellales_Reyranellaceae_Reyranella_Reyranella-sp004297405
GB_GCA_009377525_Bacteria	Proteobacteria_Alphaproteobacteria_Reyranellales_Reyranellaceae_Reyranella_Reyranella-sp009377525
GB_GCA_010032545_Bacteria	Proteobacteria_Alphaproteobacteria_Reyranellales_Reyranellaceae_Reyranella_Reyranella-sp010032545
GB_GCA_013205335_Bacteria	Proteobacteria_Alphaproteobacteria_Reyranellales_Reyranellaceae_Reyranella_Reyranella-sp013205335
GB_GCA_013290035_Bacteria	Proteobacteria_Alphaproteobacteria_Reyranellales_Reyranellaceae_Reyranella_Reyranella-sp013290035
GB_GCA_016185145_Bacteria	Proteobacteria_Alphaproteobacteria_Reyranellales_Reyranellaceae_Reyranella_Reyranella-sp016185145
GB_GCA_016191685_Bacteria	Proteobacteria_Alphaproteobacteria_Reyranellales_Reyranellaceae_Reyranella_Reyranella-sp016191685
RS_GCF_016467395_Bacteria	Proteobacteria_Alphaproteobacteria_Reyranellales_Reyranellaceae_Reyranella_Reyranella-sp016467395
GB_GCA_016780605_Bacteria	Proteobacteria_Alphaproteobacteria_Reyranellales_Reyranellaceae_Reyranella_Reyranella-sp016780605
GB_GCA_017305915_Bacteria	Proteobacteria_Alphaproteobacteria_Reyranellales_Reyranellaceae_Reyranella_Reyranella-sp017305915
GB_GCA_017307275_Bacteria	Proteobacteria_Alphaproteobacteria_Reyranellales_Reyranellaceae_Reyranella_Reyranella-sp017307275
GB_GCA_017308235_Bacteria	Proteobacteria_Alphaproteobacteria_Reyranellales_Reyranellaceae_Reyranella_Reyranella-sp017308235
GB_GCA_017990895_Bacteria	Proteobacteria_Alphaproteobacteria_Reyranellales_Reyranellaceae_Reyranella_Reyranella-sp017990895
GB_GCA_018240685_Bacteria	Proteobacteria_Alphaproteobacteria_Reyranellales_Reyranellaceae_Reyranella_Reyranella-sp018240685
GB_GCA_018240745_Bacteria	Proteobacteria_Alphaproteobacteria_Reyranellales_Reyranellaceae_Reyranella_Reyranella-sp018240745
GB_GCA_018242505_Bacteria	Proteobacteria_Alphaproteobacteria_Reyranellales_Reyranellaceae_Reyranella_Reyranella-sp018242505
RS_GCF_019039055_Bacteria	Proteobacteria_Alphaproteobacteria_Reyranellales_Reyranellaceae_Reyranella_Reyranella-sp019039055
GB_GCA_019235415_Bacteria	Proteobacteria_Alphaproteobacteria_Reyranellales_Reyranellaceae_Reyranella_Reyranella-sp019235415
GB_GCA_900110395_Bacteria	Proteobacteria_Alphaproteobacteria_Reyranellales_Reyranellaceae_Reyranella_Reyranella-sp900110395
GB_GCA_902825855_Bacteria	Proteobacteria_Alphaproteobacteria_Reyranellales_Reyranellaceae_Reyranella_Reyranella-sp902825855
GB_GCA_003574685_Bacteria	Proteobacteria_Alphaproteobacteria_Reyranellales_Reyranellaceae_SYSU-D60007_SYSU-D60007-sp003574685
RS_GCF_007859315_Bacteria	Proteobacteria_Alphaproteobacteria_Reyranellales_Reyranellaceae_SYSU-D60007_SYSU-D60007-sp007859315
GB_GCA_016870115_Bacteria	Proteobacteria_Alphaproteobacteria_Reyranellales_Reyranellaceae_VGCH01_VGCH01-sp016870115
GB_GCA_013041995_Bacteria	Proteobacteria_Alphaproteobacteria_Rhizobiales_Aestuariivirgaceae_Anderseniella_Anderseniella-sp013041995
GB_GCA_003574785_Bacteria	Proteobacteria_Alphaproteobacteria_Rhizobiales_Aestuariivirgaceae_Nordella_Nordella-sp003574785
GB_GCA_903825465_Bacteria	Proteobacteria_Alphaproteobacteria_Rhizobiales_Beijerinckiaceae_28-YEA-48_28-YEA-48-sp903825465
GB_GCA_903851305_Bacteria	Proteobacteria_Alphaproteobacteria_Rhizobiales_Beijerinckiaceae_28-YEA-48_28-YEA-48-sp903851305
GB_GCA_903861645_Bacteria	Proteobacteria_Alphaproteobacteria_Rhizobiales_Beijerinckiaceae_28-YEA-48_28-YEA-48-sp903861645
GB_GCA_903884435_Bacteria	Proteobacteria_Alphaproteobacteria_Rhizobiales_Beijerinckiaceae_28-YEA-48_28-YEA-48-sp903884435
GB_GCA_903889985_Bacteria	Proteobacteria_Alphaproteobacteria_Rhizobiales_Beijerinckiaceae_28-YEA-48_28-YEA-48-sp903889985
GB_GCA_903916165_Bacteria	Proteobacteria_Alphaproteobacteria_Rhizobiales_Beijerinckiaceae_28-YEA-48_28-YEA-48-sp903916165
RS_GCF_004341515_Bacteria	Proteobacteria_Alphaproteobacteria_Rhizobiales_Beijerinckiaceae_Bosea_Bosea-sp004341515
RS_GCF_014196925_Bacteria	Proteobacteria_Alphaproteobacteria_Rhizobiales_Beijerinckiaceae_Chelatococcus_A_Chelatococcus_A-caeni
RS_GCF_001418005_Bacteria	Proteobacteria_Alphaproteobacteria_Rhizobiales_Beijerinckiaceae_Chelatococcus_A_Chelatococcus_A-sambhunathii
RS_GCF_013044135_Bacteria	Proteobacteria_Alphaproteobacteria_Rhizobiales_Beijerinckiaceae_Enterovirga_Enterovirga-sp013044135
RS_GCF_902141855_Bacteria	Proteobacteria_Alphaproteobacteria_Rhizobiales_Beijerinckiaceae_Methylobacterium_Methylobacterium-dankookense
RS_GCF_003173735_Bacteria	Proteobacteria_Alphaproteobacteria_Rhizobiales_Beijerinckiaceae_Methylobacterium_Methylobacterium-radiodurans
RS_GCF_014199935_Bacteria	Proteobacteria_Alphaproteobacteria_Rhizobiales_Beijerinckiaceae_Methylobacterium_Methylobacterium-rhodinum
RS_GCF_008806385_Bacteria	Proteobacteria_Alphaproteobacteria_Rhizobiales_Beijerinckiaceae_Methylobacterium_Methylobacterium-soli
RS_GCF_001422885_Bacteria	Proteobacteria_Alphaproteobacteria_Rhizobiales_Beijerinckiaceae_Methylobacterium_Methylobacterium-sp001422885
RS_GCF_001422985_Bacteria	Proteobacteria_Alphaproteobacteria_Rhizobiales_Beijerinckiaceae_Methylobacterium_Methylobacterium-sp001422985
RS_GCF_001423085_Bacteria	Proteobacteria_Alphaproteobacteria_Rhizobiales_Beijerinckiaceae_Methylobacterium_Methylobacterium-sp001423085
RS_GCF_001423265_Bacteria	Proteobacteria_Alphaproteobacteria_Rhizobiales_Beijerinckiaceae_Methylobacterium_Methylobacterium-sp001423265
RS_GCF_001424705_Bacteria	Proteobacteria_Alphaproteobacteria_Rhizobiales_Beijerinckiaceae_Methylobacterium_Methylobacterium-sp001424705
RS_GCF_003201865_Bacteria	Proteobacteria_Alphaproteobacteria_Rhizobiales_Beijerinckiaceae_Methylobacterium_Methylobacterium-sp003201865
RS_GCF_003217615_Bacteria	Proteobacteria_Alphaproteobacteria_Rhizobiales_Beijerinckiaceae_Methylobacterium_Methylobacterium-sp003217615
RS_GCF_008806345_Bacteria	Proteobacteria_Alphaproteobacteria_Rhizobiales_Beijerinckiaceae_Methylobacterium_Methylobacterium-sp008806345
RS_GCF_900112625_Bacteria	Proteobacteria_Alphaproteobacteria_Rhizobiales_Beijerinckiaceae_Methylobacterium_Methylobacterium-sp900112625
RS_GCF_016743775_Bacteria	Proteobacteria_Alphaproteobacteria_Rhizobiales_Beijerinckiaceae_Microvirga_Microvirga-aerilata
RS_GCF_016811235_Bacteria	Proteobacteria_Alphaproteobacteria_Rhizobiales_Beijerinckiaceae_Microvirga_Microvirga-arabica
GB_GCA_000517005_Bacteria	Proteobacteria_Alphaproteobacteria_Rhizobiales_Beijerinckiaceae_Microvirga_Microvirga-lupini
RS_GCF_014191055_Bacteria	Proteobacteria_Alphaproteobacteria_Rhizobiales_Beijerinckiaceae_Microvirga_Microvirga-lupini_A
RS_GCF_009830105_Bacteria	Proteobacteria_Alphaproteobacteria_Rhizobiales_Beijerinckiaceae_Microvirga_Microvirga-makkahensis
RS_GCF_001006805_Bacteria	Proteobacteria_Alphaproteobacteria_Rhizobiales_Beijerinckiaceae_Microvirga_Microvirga-massiliensis
RS_GCF_000739015_Bacteria	Proteobacteria_Alphaproteobacteria_Rhizobiales_Beijerinckiaceae_Microvirga_Microvirga-sp000739015
RS_GCF_014699075_Bacteria	Proteobacteria_Alphaproteobacteria_Rhizobiales_Beijerinckiaceae_Microvirga_Microvirga-sp014699075
GB_GCA_019075905_Bacteria	Proteobacteria_Alphaproteobacteria_Rhizobiales_Beijerinckiaceae_REEB77_REEB77-sp019075905
GB_GCA_018882635_Bacteria	Proteobacteria_Alphaproteobacteria_Rhizobiales_Beijerinckiaceae_TNE-4_TNE-4-sp018882635
GB_GCA_019083985_Bacteria	Proteobacteria_Alphaproteobacteria_Rhizobiales_Beijerinckiaceae_TNE-4_TNE-4-sp019083985
RS_GCF_016698665_Bacteria	Proteobacteria_Alphaproteobacteria_Rhizobiales_Devosiaceae_Devosia_Devosia-sp016698665
RS_GCF_008000755_Bacteria	Proteobacteria_Alphaproteobacteria_Rhizobiales_Devosiaceae_Youhaiella_Youhaiella-tibetensis
GB_GCA_017353825_Bacteria	Proteobacteria_Alphaproteobacteria_Rhizobiales_Hyphomicrobiaceae_AWTP1-13_AWTP1-13-sp017353825
GB_GCA_001464855_Bacteria	Proteobacteria_Alphaproteobacteria_Rhizobiales_Hyphomicrobiaceae_Ga0077555_Ga0077555-sp001464855
GB_GCA_013141255_Bacteria	Proteobacteria_Alphaproteobacteria_Rhizobiales_Hyphomicrobiaceae_JABFRJ01_JABFRJ01-sp013141255
GB_GCA_002919265_Bacteria	Proteobacteria_Alphaproteobacteria_Rhizobiales_Hyphomicrobiaceae_ZC4RG25_ZC4RG25-sp002919265
GB_GCA_003242645_Bacteria	Proteobacteria_Alphaproteobacteria_Rhizobiales_Hyphomicrobiaceae_ZC4RG25_ZC4RG25-sp003242645
GB_GCA_003347645_Bacteria	Proteobacteria_Alphaproteobacteria_Rhizobiales_Methylopilaceae_Ga0077545_Ga0077545-sp003347645
RS_GCF_002750855_Bacteria	Proteobacteria_Alphaproteobacteria_Rhizobiales_Rhizobiaceae_Georhizobium_Georhizobium-haloflavum
RS_GCF_000759435_Bacteria	Proteobacteria_Alphaproteobacteria_Rhizobiales_Rhizobiaceae_Hoeflea_Hoeflea-sp000759435
GB_GCA_018829385_Bacteria	Proteobacteria_Alphaproteobacteria_Rhizobiales_Rhizobiaceae_Hoeflea_Hoeflea-sp018829385
GB_GCA_016711085_Bacteria	Proteobacteria_Alphaproteobacteria_Rhizobiales_Rhizobiaceae_JADJTR01_JADJTR01-sp016711085
GB_GCA_905479965_Bacteria	Proteobacteria_Alphaproteobacteria_Rhizobiales_Rhizobiaceae_Lentilitoribacter_Lentilitoribacter-sp905479965
RS_GCF_014595955_Bacteria	Proteobacteria_Alphaproteobacteria_Rhizobiales_Rhizobiaceae_Mesorhizobium_D_Mesorhizobium_D-sp014595955
GB_GCA_000985895_Bacteria	Proteobacteria_Alphaproteobacteria_Rhizobiales_Rhizobiaceae_Neorhizobium_Neorhizobium-galegae_B
RS_GCF_003425685_Bacteria	Proteobacteria_Alphaproteobacteria_Rhizobiales_Rhizobiaceae_Neorhizobium_Neorhizobium-sp003425685
GB_GCA_002968845_Bacteria	Proteobacteria_Alphaproteobacteria_Rhizobiales_Rhizobiaceae_Neorhizobium_Neorhizobium-tomejilense
GB_GCA_003232595_Bacteria	Proteobacteria_Alphaproteobacteria_Rhizobiales_Rhizobiaceae_SZUA-100_SZUA-100-sp003232595
RS_GCF_002198715_Bacteria	Proteobacteria_Alphaproteobacteria_Rhizobiales_Rhodomicrobiaceae_R-RK-3_R-RK-3-sp002198715
GB_GCA_011374735_Bacteria	Proteobacteria_Alphaproteobacteria_Rhizobiales_Thermopetrobacteraceae_Thermopetrobacter_Thermopetrobacter-sp011374735
GB_GCA_017305515_Bacteria	Proteobacteria_Alphaproteobacteria_Rhizobiales_Xanthobacteraceae_Afipia_Afipia-sp017305515
RS_GCF_018390605_Bacteria	Proteobacteria_Alphaproteobacteria_Rhizobiales_Xanthobacteraceae_Ancylobacter_B_Ancylobacter_B-defluvii
RS_GCF_018390555_Bacteria	Proteobacteria_Alphaproteobacteria_Rhizobiales_Xanthobacteraceae_Ancylobacter_B_Ancylobacter_B-oerskovii
GB_GCA_019243195_Bacteria	Proteobacteria_Alphaproteobacteria_Rhizobiales_Xanthobacteraceae_AP-16_AP-16-sp019243195
RS_GCF_000473085_Bacteria	Proteobacteria_Alphaproteobacteria_Rhizobiales_Xanthobacteraceae_Azorhizobium_Azorhizobium-doebereinerae
RS_GCF_016031625_Bacteria	Proteobacteria_Alphaproteobacteria_Rhizobiales_Xanthobacteraceae_Bradyrhizobium_Bradyrhizobium-agreste
RS_GCF_015291705_Bacteria	Proteobacteria_Alphaproteobacteria_Rhizobiales_Xanthobacteraceae_Bradyrhizobium_Bradyrhizobium-arachidis
RS_GCF_008932115_Bacteria	Proteobacteria_Alphaproteobacteria_Rhizobiales_Xanthobacteraceae_Bradyrhizobium_Bradyrhizobium-betae
RS_GCF_004123905_Bacteria	Proteobacteria_Alphaproteobacteria_Rhizobiales_Xanthobacteraceae_Bradyrhizobium_Bradyrhizobium-betae_A
RS_GCF_009759665_Bacteria	Proteobacteria_Alphaproteobacteria_Rhizobiales_Xanthobacteraceae_Bradyrhizobium_Bradyrhizobium-cajani
RS_GCF_014529705_Bacteria	Proteobacteria_Alphaproteobacteria_Rhizobiales_Xanthobacteraceae_Bradyrhizobium_Bradyrhizobium-campsiandrae
RS_GCF_016907215_Bacteria	Proteobacteria_Alphaproteobacteria_Rhizobiales_Xanthobacteraceae_Bradyrhizobium_Bradyrhizobium-canariense
RS_GCF_900105125_Bacteria	Proteobacteria_Alphaproteobacteria_Rhizobiales_Xanthobacteraceae_Bradyrhizobium_Bradyrhizobium-canariense_A
RS_GCF_018130465_Bacteria	Proteobacteria_Alphaproteobacteria_Rhizobiales_Xanthobacteraceae_Bradyrhizobium_Bradyrhizobium-canariense_C
RS_GCF_001641635_Bacteria	Proteobacteria_Alphaproteobacteria_Rhizobiales_Xanthobacteraceae_Bradyrhizobium_Bradyrhizobium-centrolobii
RS_GCF_007290395_Bacteria	Proteobacteria_Alphaproteobacteria_Rhizobiales_Xanthobacteraceae_Bradyrhizobium_Bradyrhizobium-cosmicum
RS_GCF_008123515_Bacteria	Proteobacteria_Alphaproteobacteria_Rhizobiales_Xanthobacteraceae_Bradyrhizobium_Bradyrhizobium-cytisi
RS_GCF_007830205_Bacteria	Proteobacteria_Alphaproteobacteria_Rhizobiales_Xanthobacteraceae_Bradyrhizobium_Bradyrhizobium-daqingense
RS_GCF_018129965_Bacteria	Proteobacteria_Alphaproteobacteria_Rhizobiales_Xanthobacteraceae_Bradyrhizobium_Bradyrhizobium-diazoefficiens_A
RS_GCF_018131015_Bacteria	Proteobacteria_Alphaproteobacteria_Rhizobiales_Xanthobacteraceae_Bradyrhizobium_Bradyrhizobium-diazoefficiens_B
RS_GCF_016612535_Bacteria	Proteobacteria_Alphaproteobacteria_Rhizobiales_Xanthobacteraceae_Bradyrhizobium_Bradyrhizobium-diazoefficiens_C
RS_GCF_016599855_Bacteria	Proteobacteria_Alphaproteobacteria_Rhizobiales_Xanthobacteraceae_Bradyrhizobium_Bradyrhizobium-diazoefficiens_D
RS_GCF_016616425_Bacteria	Proteobacteria_Alphaproteobacteria_Rhizobiales_Xanthobacteraceae_Bradyrhizobium_Bradyrhizobium-diazoefficiens_E
RS_GCF_016616885_Bacteria	Proteobacteria_Alphaproteobacteria_Rhizobiales_Xanthobacteraceae_Bradyrhizobium_Bradyrhizobium-diazoefficiens_F
RS_GCF_018131185_Bacteria	Proteobacteria_Alphaproteobacteria_Rhizobiales_Xanthobacteraceae_Bradyrhizobium_Bradyrhizobium-diazoefficiens_G
RS_GCF_016616235_Bacteria	Proteobacteria_Alphaproteobacteria_Rhizobiales_Xanthobacteraceae_Bradyrhizobium_Bradyrhizobium-diazoefficiens_H
RS_GCF_016031635_Bacteria	Proteobacteria_Alphaproteobacteria_Rhizobiales_Xanthobacteraceae_Bradyrhizobium_Bradyrhizobium-diversitatis
RS_GCF_000379145_Bacteria	Proteobacteria_Alphaproteobacteria_Rhizobiales_Xanthobacteraceae_Bradyrhizobium_Bradyrhizobium-elkanii
RS_GCF_001189235_Bacteria	Proteobacteria_Alphaproteobacteria_Rhizobiales_Xanthobacteraceae_Bradyrhizobium_Bradyrhizobium-embrapense
RS_GCF_900129675_Bacteria	Proteobacteria_Alphaproteobacteria_Rhizobiales_Xanthobacteraceae_Bradyrhizobium_Bradyrhizobium-erythrophlei_A
RS_GCF_900142985_Bacteria	Proteobacteria_Alphaproteobacteria_Rhizobiales_Xanthobacteraceae_Bradyrhizobium_Bradyrhizobium-erythrophlei_B
RS_GCF_900129425_Bacteria	Proteobacteria_Alphaproteobacteria_Rhizobiales_Xanthobacteraceae_Bradyrhizobium_Bradyrhizobium-erythrophlei_C
RS_GCF_900105845_Bacteria	Proteobacteria_Alphaproteobacteria_Rhizobiales_Xanthobacteraceae_Bradyrhizobium_Bradyrhizobium-erythrophlei_E
RS_GCF_002795245_Bacteria	Proteobacteria_Alphaproteobacteria_Rhizobiales_Xanthobacteraceae_Bradyrhizobium_Bradyrhizobium-forestalis
RS_GCF_004570865_Bacteria	Proteobacteria_Alphaproteobacteria_Rhizobiales_Xanthobacteraceae_Bradyrhizobium_Bradyrhizobium-frederickii
RS_GCF_016031655_Bacteria	Proteobacteria_Alphaproteobacteria_Rhizobiales_Xanthobacteraceae_Bradyrhizobium_Bradyrhizobium-glycinis
RS_GCF_008123965_Bacteria	Proteobacteria_Alphaproteobacteria_Rhizobiales_Xanthobacteraceae_Bradyrhizobium_Bradyrhizobium-hipponense
RS_GCF_007830635_Bacteria	Proteobacteria_Alphaproteobacteria_Rhizobiales_Xanthobacteraceae_Bradyrhizobium_Bradyrhizobium-huanghuaihaiense
RS_GCF_900696085_Bacteria	Proteobacteria_Alphaproteobacteria_Rhizobiales_Xanthobacteraceae_Bradyrhizobium_Bradyrhizobium-ivorense
RS_GCF_000284375_Bacteria	Proteobacteria_Alphaproteobacteria_Rhizobiales_Xanthobacteraceae_Bradyrhizobium_Bradyrhizobium-japonicum
RS_GCF_015291725_Bacteria	Proteobacteria_Alphaproteobacteria_Rhizobiales_Xanthobacteraceae_Bradyrhizobium_Bradyrhizobium-japonicum_D
RS_GCF_018130215_Bacteria	Proteobacteria_Alphaproteobacteria_Rhizobiales_Xanthobacteraceae_Bradyrhizobium_Bradyrhizobium-jicamae_A
RS_GCF_018130695_Bacteria	Proteobacteria_Alphaproteobacteria_Rhizobiales_Xanthobacteraceae_Bradyrhizobium_Bradyrhizobium-jicamae_B
RS_GCF_900141755_Bacteria	Proteobacteria_Alphaproteobacteria_Rhizobiales_Xanthobacteraceae_Bradyrhizobium_Bradyrhizobium-lablabi_A
RS_GCF_018131005_Bacteria	Proteobacteria_Alphaproteobacteria_Rhizobiales_Xanthobacteraceae_Bradyrhizobium_Bradyrhizobium-lablabi_D
RS_GCF_018130785_Bacteria	Proteobacteria_Alphaproteobacteria_Rhizobiales_Xanthobacteraceae_Bradyrhizobium_Bradyrhizobium-liaoningense_A
RS_GCF_018130825_Bacteria	Proteobacteria_Alphaproteobacteria_Rhizobiales_Xanthobacteraceae_Bradyrhizobium_Bradyrhizobium-liaoningense_B
RS_GCF_001542415_Bacteria	Proteobacteria_Alphaproteobacteria_Rhizobiales_Xanthobacteraceae_Bradyrhizobium_Bradyrhizobium-macuxiense
RS_GCF_007993935_Bacteria	Proteobacteria_Alphaproteobacteria_Rhizobiales_Xanthobacteraceae_Bradyrhizobium_Bradyrhizobium-macuxiense_A
RS_GCF_001440035_Bacteria	Proteobacteria_Alphaproteobacteria_Rhizobiales_Xanthobacteraceae_Bradyrhizobium_Bradyrhizobium-manausense
RS_GCF_018130615_Bacteria	Proteobacteria_Alphaproteobacteria_Rhizobiales_Xanthobacteraceae_Bradyrhizobium_Bradyrhizobium-manausense_A
RS_GCF_018131105_Bacteria	Proteobacteria_Alphaproteobacteria_Rhizobiales_Xanthobacteraceae_Bradyrhizobium_Bradyrhizobium-manausense_B
RS_GCF_018130945_Bacteria	Proteobacteria_Alphaproteobacteria_Rhizobiales_Xanthobacteraceae_Bradyrhizobium_Bradyrhizobium-manausense_C
RS_GCF_018129685_Bacteria	Proteobacteria_Alphaproteobacteria_Rhizobiales_Xanthobacteraceae_Bradyrhizobium_Bradyrhizobium-manausense_D
RS_GCF_001982635_Bacteria	Proteobacteria_Alphaproteobacteria_Rhizobiales_Xanthobacteraceae_Bradyrhizobium_Bradyrhizobium-mercantei
RS_GCF_004571025_Bacteria	Proteobacteria_Alphaproteobacteria_Rhizobiales_Xanthobacteraceae_Bradyrhizobium_Bradyrhizobium-niftali
RS_GCF_001189245_Bacteria	Proteobacteria_Alphaproteobacteria_Rhizobiales_Xanthobacteraceae_Bradyrhizobium_Bradyrhizobium-pachyrhizi
RS_GCF_008123425_Bacteria	Proteobacteria_Alphaproteobacteria_Rhizobiales_Xanthobacteraceae_Bradyrhizobium_Bradyrhizobium-rifense
RS_GCF_002068095_Bacteria	Proteobacteria_Alphaproteobacteria_Rhizobiales_Xanthobacteraceae_Bradyrhizobium_Bradyrhizobium-sacchari
RS_GCF_011516645_Bacteria	Proteobacteria_Alphaproteobacteria_Rhizobiales_Xanthobacteraceae_Bradyrhizobium_Bradyrhizobium-septentrionale
RS_GCF_900094605_Bacteria	Proteobacteria_Alphaproteobacteria_Rhizobiales_Xanthobacteraceae_Bradyrhizobium_Bradyrhizobium-shewense
RS_GCF_000244915_Bacteria	Proteobacteria_Alphaproteobacteria_Rhizobiales_Xanthobacteraceae_Bradyrhizobium_Bradyrhizobium-sp000244915
RS_GCF_000282615_Bacteria	Proteobacteria_Alphaproteobacteria_Rhizobiales_Xanthobacteraceae_Bradyrhizobium_Bradyrhizobium-sp000282615
RS_GCF_000296215_Bacteria	Proteobacteria_Alphaproteobacteria_Rhizobiales_Xanthobacteraceae_Bradyrhizobium_Bradyrhizobium-sp000296215
RS_GCF_000426105_Bacteria	Proteobacteria_Alphaproteobacteria_Rhizobiales_Xanthobacteraceae_Bradyrhizobium_Bradyrhizobium-sp000426105
RS_GCF_000472385_Bacteria	Proteobacteria_Alphaproteobacteria_Rhizobiales_Xanthobacteraceae_Bradyrhizobium_Bradyrhizobium-sp000472385
RS_GCF_000472425_Bacteria	Proteobacteria_Alphaproteobacteria_Rhizobiales_Xanthobacteraceae_Bradyrhizobium_Bradyrhizobium-sp000472425
RS_GCF_000472925_Bacteria	Proteobacteria_Alphaproteobacteria_Rhizobiales_Xanthobacteraceae_Bradyrhizobium_Bradyrhizobium-sp000472925
RS_GCF_000473045_Bacteria	Proteobacteria_Alphaproteobacteria_Rhizobiales_Xanthobacteraceae_Bradyrhizobium_Bradyrhizobium-sp000473045
RS_GCF_000473065_Bacteria	Proteobacteria_Alphaproteobacteria_Rhizobiales_Xanthobacteraceae_Bradyrhizobium_Bradyrhizobium-sp000473065
RS_GCF_000515415_Bacteria	Proteobacteria_Alphaproteobacteria_Rhizobiales_Xanthobacteraceae_Bradyrhizobium_Bradyrhizobium-sp000515415
RS_GCF_000617845_Bacteria	Proteobacteria_Alphaproteobacteria_Rhizobiales_Xanthobacteraceae_Bradyrhizobium_Bradyrhizobium-sp000617845
RS_GCF_000938255_Bacteria	Proteobacteria_Alphaproteobacteria_Rhizobiales_Xanthobacteraceae_Bradyrhizobium_Bradyrhizobium-sp000938255
RS_GCF_000938305_Bacteria	Proteobacteria_Alphaproteobacteria_Rhizobiales_Xanthobacteraceae_Bradyrhizobium_Bradyrhizobium-sp000938305
RS_GCF_001908235_Bacteria	Proteobacteria_Alphaproteobacteria_Rhizobiales_Xanthobacteraceae_Bradyrhizobium_Bradyrhizobium-sp001908235
RS_GCF_002532045_Bacteria	Proteobacteria_Alphaproteobacteria_Rhizobiales_Xanthobacteraceae_Bradyrhizobium_Bradyrhizobium-sp002532045
RS_GCF_002831585_Bacteria	Proteobacteria_Alphaproteobacteria_Rhizobiales_Xanthobacteraceae_Bradyrhizobium_Bradyrhizobium-sp002831585
RS_GCF_003001755_Bacteria	Proteobacteria_Alphaproteobacteria_Rhizobiales_Xanthobacteraceae_Bradyrhizobium_Bradyrhizobium-sp003001755
RS_GCF_016839165_Bacteria	Proteobacteria_Alphaproteobacteria_Rhizobiales_Xanthobacteraceae_Bradyrhizobium_Bradyrhizobium-sp003020075
RS_GCF_003020115_Bacteria	Proteobacteria_Alphaproteobacteria_Rhizobiales_Xanthobacteraceae_Bradyrhizobium_Bradyrhizobium-sp003020115
RS_GCF_003837805_Bacteria	Proteobacteria_Alphaproteobacteria_Rhizobiales_Xanthobacteraceae_Bradyrhizobium_Bradyrhizobium-sp003837805
GB_GCA_003963435_Bacteria	Proteobacteria_Alphaproteobacteria_Rhizobiales_Xanthobacteraceae_Bradyrhizobium_Bradyrhizobium-sp003963435
RS_GCF_004212635_Bacteria	Proteobacteria_Alphaproteobacteria_Rhizobiales_Xanthobacteraceae_Bradyrhizobium_Bradyrhizobium-sp004212635
RS_GCF_004216735_Bacteria	Proteobacteria_Alphaproteobacteria_Rhizobiales_Xanthobacteraceae_Bradyrhizobium_Bradyrhizobium-sp004216735
GB_GCA_004799445_Bacteria	Proteobacteria_Alphaproteobacteria_Rhizobiales_Xanthobacteraceae_Bradyrhizobium_Bradyrhizobium-sp004799445
GB_GCA_005884765_Bacteria	Proteobacteria_Alphaproteobacteria_Rhizobiales_Xanthobacteraceae_Bradyrhizobium_Bradyrhizobium-sp005884765
GB_GCA_005885285_Bacteria	Proteobacteria_Alphaproteobacteria_Rhizobiales_Xanthobacteraceae_Bradyrhizobium_Bradyrhizobium-sp005885285
RS_GCF_009766005_Bacteria	Proteobacteria_Alphaproteobacteria_Rhizobiales_Xanthobacteraceae_Bradyrhizobium_Bradyrhizobium-sp009766005
RS_GCF_011516635_Bacteria	Proteobacteria_Alphaproteobacteria_Rhizobiales_Xanthobacteraceae_Bradyrhizobium_Bradyrhizobium-sp011516635
RS_GCF_011602485_Bacteria	Proteobacteria_Alphaproteobacteria_Rhizobiales_Xanthobacteraceae_Bradyrhizobium_Bradyrhizobium-sp011602485
RS_GCF_013240495_Bacteria	Proteobacteria_Alphaproteobacteria_Rhizobiales_Xanthobacteraceae_Bradyrhizobium_Bradyrhizobium-sp013240495
RS_GCF_014198245_Bacteria	Proteobacteria_Alphaproteobacteria_Rhizobiales_Xanthobacteraceae_Bradyrhizobium_Bradyrhizobium-sp014198245
RS_GCF_015291625_Bacteria	Proteobacteria_Alphaproteobacteria_Rhizobiales_Xanthobacteraceae_Bradyrhizobium_Bradyrhizobium-sp015291625
RS_GCF_015624505_Bacteria	Proteobacteria_Alphaproteobacteria_Rhizobiales_Xanthobacteraceae_Bradyrhizobium_Bradyrhizobium-sp015624505
RS_GCF_017872875_Bacteria	Proteobacteria_Alphaproteobacteria_Rhizobiales_Xanthobacteraceae_Bradyrhizobium_Bradyrhizobium-sp017872875
RS_GCF_018449525_Bacteria	Proteobacteria_Alphaproteobacteria_Rhizobiales_Xanthobacteraceae_Bradyrhizobium_Bradyrhizobium-sp018449525
RS_GCF_018449695_Bacteria	Proteobacteria_Alphaproteobacteria_Rhizobiales_Xanthobacteraceae_Bradyrhizobium_Bradyrhizobium-sp018449695
GB_GCA_018971625_Bacteria	Proteobacteria_Alphaproteobacteria_Rhizobiales_Xanthobacteraceae_Bradyrhizobium_Bradyrhizobium-sp018971625
GB_GCA_018971675_Bacteria	Proteobacteria_Alphaproteobacteria_Rhizobiales_Xanthobacteraceae_Bradyrhizobium_Bradyrhizobium-sp018971675
GB_GCA_019242285_Bacteria	Proteobacteria_Alphaproteobacteria_Rhizobiales_Xanthobacteraceae_Bradyrhizobium_Bradyrhizobium-sp019242285
GB_GCA_019243075_Bacteria	Proteobacteria_Alphaproteobacteria_Rhizobiales_Xanthobacteraceae_Bradyrhizobium_Bradyrhizobium-sp019243075
RS_GCF_900109945_Bacteria	Proteobacteria_Alphaproteobacteria_Rhizobiales_Xanthobacteraceae_Bradyrhizobium_Bradyrhizobium-sp900109945
RS_GCF_900113735_Bacteria	Proteobacteria_Alphaproteobacteria_Rhizobiales_Xanthobacteraceae_Bradyrhizobium_Bradyrhizobium-sp900113735
RS_GCF_001189845_Bacteria	Proteobacteria_Alphaproteobacteria_Rhizobiales_Xanthobacteraceae_Bradyrhizobium_Bradyrhizobium-tropiciagri
RS_GCF_018130545_Bacteria	Proteobacteria_Alphaproteobacteria_Rhizobiales_Xanthobacteraceae_Bradyrhizobium_Bradyrhizobium-tropiciagri_A
RS_GCF_018130505_Bacteria	Proteobacteria_Alphaproteobacteria_Rhizobiales_Xanthobacteraceae_Bradyrhizobium_Bradyrhizobium-tropiciagri_B
RS_GCF_004114425_Bacteria	Proteobacteria_Alphaproteobacteria_Rhizobiales_Xanthobacteraceae_Bradyrhizobium_Bradyrhizobium-vignae
RS_GCF_900094575_Bacteria	Proteobacteria_Alphaproteobacteria_Rhizobiales_Xanthobacteraceae_Bradyrhizobium_Bradyrhizobium-yuanmingense
RS_GCF_004114935_Bacteria	Proteobacteria_Alphaproteobacteria_Rhizobiales_Xanthobacteraceae_Bradyrhizobium_Bradyrhizobium-zhanjiangense
GB_GCA_019241285_Bacteria	Proteobacteria_Alphaproteobacteria_Rhizobiales_Xanthobacteraceae_JAFAXD01_JAFAXD01-sp019241285
GB_GCA_001896955_Bacteria	Proteobacteria_Alphaproteobacteria_Rhizobiales_Xanthobacteraceae_Nitrobacter_Nitrobacter-sp001896955
GB_GCA_001897285_Bacteria	Proteobacteria_Alphaproteobacteria_Rhizobiales_Xanthobacteraceae_Nitrobacter_Nitrobacter-sp001897285
GB_GCA_903891395_Bacteria	Proteobacteria_Alphaproteobacteria_Rhizobiales_Xanthobacteraceae_Pseudolabrys_Pseudolabrys-sp903891395
GB_GCA_903929045_Bacteria	Proteobacteria_Alphaproteobacteria_Rhizobiales_Xanthobacteraceae_Pseudolabrys_Pseudolabrys-sp903929045
RS_GCF_003258865_Bacteria	Proteobacteria_Alphaproteobacteria_Rhizobiales_Xanthobacteraceae_Rhodoplanes_Rhodoplanes-roseus
RS_GCF_017872635_Bacteria	Proteobacteria_Alphaproteobacteria_Rhizobiales_Xanthobacteraceae_Starkeya_Starkeya-sp017872635
GB_GCA_005883115_Bacteria	Proteobacteria_Alphaproteobacteria_Rhizobiales_Xanthobacteraceae_VAZQ01_VAZQ01-sp005883115
GB_GCA_009377695_Bacteria	Proteobacteria_Alphaproteobacteria_Rhizobiales_Xanthobacteraceae_VAZQ01_VAZQ01-sp009377695
GB_GCA_019237215_Bacteria	Proteobacteria_Alphaproteobacteria_Rhizobiales_Xanthobacteraceae_VAZQ01_VAZQ01-sp019237215
RS_GCF_001579845_Bacteria	Proteobacteria_Alphaproteobacteria_Rhizobiales_Xanthobacteraceae_Z2-YC6860_Z2-YC6860-sp001579845
GB_GCA_003169835_Bacteria	Proteobacteria_Alphaproteobacteria_Rhizobiales_Xanthobacteraceae_Z2-YC6860_Z2-YC6860-sp003169835
GB_GCA_017304505_Bacteria	Proteobacteria_Alphaproteobacteria_Rhizobiales_Xanthobacteraceae_Z2-YC6860_Z2-YC6860-sp017304505
RS_GCF_012070395_Bacteria	Proteobacteria_Alphaproteobacteria_Rhodobacterales_Rhodobacteraceae_CLL3-39_CLL3-39-sp012070395
GB_GCA_002282555_Bacteria	Proteobacteria_Alphaproteobacteria_Rhodobacterales_Rhodobacteraceae_EhC02_EhC02-sp002282555
GB_GCA_013042765_Bacteria	Proteobacteria_Alphaproteobacteria_Rhodobacterales_Rhodobacteraceae_Litoreibacter_Litoreibacter-sp013042765
GB_GCA_902573175_Bacteria	Proteobacteria_Alphaproteobacteria_Rhodobacterales_Rhodobacteraceae_MED-G52_MED-G52-sp902573175
RS_GCF_014640115_Bacteria	Proteobacteria_Alphaproteobacteria_Rhodobacterales_Rhodobacteraceae_Muriiphilus_Muriiphilus-lacisalsi
GB_GCA_003694465_Bacteria	Proteobacteria_Alphaproteobacteria_Rhodobacterales_Rhodobacteraceae_Muriiphilus_Muriiphilus-sp003694465
RS_GCF_900177545_Bacteria	Proteobacteria_Alphaproteobacteria_Rhodobacterales_Rhodobacteraceae_Muriiphilus_Muriiphilus-sp900177545
RS_GCF_900172315_Bacteria	Proteobacteria_Alphaproteobacteria_Rhodobacterales_Rhodobacteraceae_Palleronia_Palleronia-marisminoris
RS_GCF_004522155_Bacteria	Proteobacteria_Alphaproteobacteria_Rhodobacterales_Rhodobacteraceae_Paracoccus_Paracoccus-luteus
RS_GCF_900199195_Bacteria	Proteobacteria_Alphaproteobacteria_Rhodobacterales_Rhodobacteraceae_Paracoccus_Paracoccus-seriniphilus
RS_GCF_003591515_Bacteria	Proteobacteria_Alphaproteobacteria_Rhodobacterales_Rhodobacteraceae_Paracoccus_Paracoccus-sp003591515
RS_GCF_009674885_Bacteria	Proteobacteria_Alphaproteobacteria_Rhodobacterales_Rhodobacteraceae_Paracoccus_Paracoccus-sp009674885
GB_GCA_003561595_Bacteria	Proteobacteria_Alphaproteobacteria_Rhodobacterales_Rhodobacteraceae_Roseinatronobacter_Roseinatronobacter-sp003561595
RS_GCF_017916275_Bacteria	Proteobacteria_Alphaproteobacteria_Rhodobacterales_Rhodobacteraceae_Rubellimicrobium_Rubellimicrobium-sp017916275
GB_GCA_016124615_Bacteria	Proteobacteria_Alphaproteobacteria_Rhodobacterales_Rhodobacteraceae_Solirhodobacter_Solirhodobacter-sp016124615
GB_GCA_013139555_Bacteria	Proteobacteria_Alphaproteobacteria_Rhodobacterales_Rhodobacteraceae_Sulfitobacter_Sulfitobacter-sp013139555
GB_GCA_003250135_Bacteria	Proteobacteria_Alphaproteobacteria_Rhodobacterales_Rhodobacteraceae_SZUA-547_SZUA-547-sp003250135
GB_GCA_003536295_Bacteria	Proteobacteria_Alphaproteobacteria_Rhodobacterales_Rhodobacteraceae_UBA10365_UBA10365-sp003536295
GB_GCA_015485015_Bacteria	Proteobacteria_Alphaproteobacteria_Rhodobacterales_Rhodobacteraceae_UBA3077_UBA3077-sp015485015
GB_GCA_002430125_Bacteria	Proteobacteria_Alphaproteobacteria_Rhodobacterales_Rhodobacteraceae_UBA5972_UBA5972-sp002430125
GB_GCA_002717285_Bacteria	Proteobacteria_Alphaproteobacteria_Rhodospirillales_2-02-FULL-58-16_A_GCA-2717285_GCA-2717285-sp002717285
GB_GCA_013204045_Bacteria	Proteobacteria_Alphaproteobacteria_Rhodospirillales_2-02-FULL-58-16_A_JABMOQ01_JABMOQ01-sp013204045
GB_GCA_014382375_Bacteria	Proteobacteria_Alphaproteobacteria_Rhodospirillales_2-02-FULL-58-16_A_JACNJU01_JACNJU01-sp014382375
GB_GCA_016872535_Bacteria	Proteobacteria_Alphaproteobacteria_Rhodospirillales_2-12-FULL-67-15_2-12-FULL-67-15_2-12-FULL-67-15-sp016872535
GB_GCA_009694195_Bacteria	Proteobacteria_Alphaproteobacteria_Rhodospirillales_2-12-FULL-67-15_SHVQ01_SHVQ01-sp009694195
GB_GCA_002938315_Bacteria	Proteobacteria_Alphaproteobacteria_Rhodospirillales_Casp-alpha2_Casp-alpha2_Casp-alpha2-sp002938315
GB_GCA_013203955_Bacteria	Proteobacteria_Alphaproteobacteria_Rhodospirillales_Casp-alpha2_Casp-alpha2_Casp-alpha2-sp013203955
GB_GCA_013204265_Bacteria	Proteobacteria_Alphaproteobacteria_Rhodospirillales_Casp-alpha2_Casp-alpha2_Casp-alpha2-sp013204265
GB_GCA_013203595_Bacteria	Proteobacteria_Alphaproteobacteria_Rhodospirillales_Casp-alpha2_JABMNT01_JABMNT01-sp013203595
GB_GCA_002938045_Bacteria	Proteobacteria_Alphaproteobacteria_Rhodospirillales_Casp-alpha2_PTLJ01_PTLJ01-sp002938045
GB_GCA_002781745_Bacteria	Proteobacteria_Alphaproteobacteria_Rhodospirillales_Casp-alpha2_UBA1479_UBA1479-sp002781745
GB_GCA_002378125_Bacteria	Proteobacteria_Alphaproteobacteria_Rhodospirillales_Casp-alpha2_UBA3470_UBA3470-sp002378125
GB_GCA_018665815_Bacteria	Proteobacteria_Alphaproteobacteria_Rhodospirillales_Casp-alpha2_UBA3470_UBA3470-sp018665815
GB_GCA_017857825_Bacteria	Proteobacteria_Alphaproteobacteria_Rhodospirillales_Casp-alpha2_UBA4479_UBA4479-sp017857825
GB_GCA_003354135_Bacteria	Proteobacteria_Alphaproteobacteria_Rhodospirillales_GLO-3_GLO-3_GLO-3-sp003354135
GB_GCA_018660465_Bacteria	Proteobacteria_Alphaproteobacteria_Rhodospirillales_JABJKH01_JABJKH01_JABJKH01-sp018660465
GB_GCA_016776525_Bacteria	Proteobacteria_Alphaproteobacteria_Rhodospirillales_JADHTD01_JADHTD01_JADHTD01-sp016776525
RS_GCF_000968135_Bacteria	Proteobacteria_Alphaproteobacteria_Rhodospirillales_Magnetospiraceae_Magnetospira_Magnetospira-sp000968135
GB_GCA_903899885_Bacteria	Proteobacteria_Alphaproteobacteria_Rhodospirillales_Magnetospirillaceae_CAIULK01_CAIULK01-sp903899885
RS_GCF_000513295_Bacteria	Proteobacteria_Alphaproteobacteria_Rhodospirillales_Magnetospirillaceae_Magnetospirillum_Magnetospirillum-gryphiswaldense
RS_GCF_001650635_Bacteria	Proteobacteria_Alphaproteobacteria_Rhodospirillales_Magnetospirillaceae_Magnetospirillum_Magnetospirillum-moscoviense
GB_GCA_001898825_Bacteria	Proteobacteria_Alphaproteobacteria_Rhodospirillales_Magnetospirillaceae_Magnetospirillum_Magnetospirillum-sp001898825
GB_GCA_002435715_Bacteria	Proteobacteria_Alphaproteobacteria_Rhodospirillales_Magnetospirillaceae_Magnetospirillum_Magnetospirillum-sp002435715
GB_GCA_006218045_Bacteria	Proteobacteria_Alphaproteobacteria_Rhodospirillales_Magnetospirillaceae_Magnetospirillum_Magnetospirillum-sp006218045
RS_GCF_018224925_Bacteria	Proteobacteria_Alphaproteobacteria_Rhodospirillales_Magnetospirillaceae_Magnetospirillum_Magnetospirillum-sp018224925
RS_GCF_902729435_Bacteria	Proteobacteria_Alphaproteobacteria_Rhodospirillales_Magnetospirillaceae_Magnetospirillum_Magnetospirillum-sp902729435
GB_GCA_903941095_Bacteria	Proteobacteria_Alphaproteobacteria_Rhodospirillales_Magnetospirillaceae_Magnetospirillum_Magnetospirillum-sp903941095
RS_GCF_003284725_Bacteria	Proteobacteria_Alphaproteobacteria_Rhodospirillales_Magnetospirillaceae_Phaeospirillum_Phaeospirillum-kuznetsovii
GB_GCA_903853455_Bacteria	Proteobacteria_Alphaproteobacteria_Rhodospirillales_Magnetospirillaceae_Phaeospirillum_Phaeospirillum-sp903853455
RS_GCF_002845745_Bacteria	Proteobacteria_Alphaproteobacteria_Rhodospirillales_Magnetospirillaceae_Telmatospirillum_Telmatospirillum-siberiense
GB_GCA_002401565_Bacteria	Proteobacteria_Alphaproteobacteria_Rhodospirillales_Magnetovibrionaceae_Magnetovibrio_Magnetovibrio-sp002401565
GB_GCA_002732845_Bacteria	Proteobacteria_Alphaproteobacteria_Rhodospirillales_Magnetovibrionaceae_Magnetovibrio_Magnetovibrio-sp002732845
GB_GCA_016763255_Bacteria	Proteobacteria_Alphaproteobacteria_Rhodospirillales_Magnetovibrionaceae_Magnetovibrio_Magnetovibrio-sp016763255
GB_GCA_000961745_Bacteria	Proteobacteria_Alphaproteobacteria_Rhodospirillales_Rhodospirillaceae_BRH-c57_BRH-c57-sp000961745
RS_GCF_900156605_Bacteria	Proteobacteria_Alphaproteobacteria_Rhodospirillales_Rhodospirillaceae_Insolitispirillum_Insolitispirillum-peregrinum
GB_GCA_015228695_Bacteria	Proteobacteria_Alphaproteobacteria_Rhodospirillales_Rhodospirillaceae_JADGDA01_JADGDA01-sp015228695
RS_GCF_014197795_Bacteria	Proteobacteria_Alphaproteobacteria_Rhodospirillales_Rhodospirillaceae_Rhodospira_Rhodospira-goensis
RS_GCF_014197855_Bacteria	Proteobacteria_Alphaproteobacteria_Rhodospirillales_Rhodospirillaceae_Rhodospira_Rhodospira-marina
RS_GCF_009601025_Bacteria	Proteobacteria_Alphaproteobacteria_Rhodospirillales_Rhodospirillaceae_Rhodospira_Rhodospira-navarrensis
RS_GCF_014197915_Bacteria	Proteobacteria_Alphaproteobacteria_Rhodospirillales_Rhodospirillaceae_Rhodospira_Rhodospira-visakhapatnamensis
GB_GCA_002725625_Bacteria	Proteobacteria_Alphaproteobacteria_Rhodospirillales_UBA2165_GCA-2725625_GCA-2725625-sp002725625
GB_GCA_018649725_Bacteria	Proteobacteria_Alphaproteobacteria_Rhodospirillales_UBA2165_TMED23_TMED23-sp018649725
GB_GCA_016214125_Bacteria	Proteobacteria_Alphaproteobacteria_Rhodospirillales_WMHbin7_JACRPC01_JACRPC01-sp016214125
GB_GCA_002753155_Bacteria	Proteobacteria_Alphaproteobacteria_Rhodospirillales_WMHbin7_WMHbin7_WMHbin7-sp002753155
GB_GCA_015232335_Bacteria	Proteobacteria_Alphaproteobacteria_Rhodospirillales_WMHbin7_WMHbin7_WMHbin7-sp015232335
GB_GCA_016215555_Bacteria	Proteobacteria_Alphaproteobacteria_Rhodospirillales_WMHbin7_WMHbin7_WMHbin7-sp016215555
GB_GCA_016195085_Bacteria	Proteobacteria_Alphaproteobacteria_SHVZ01_SHVZ01_JACQAG01_JACQAG01-sp016195085
GB_GCA_016792585_Bacteria	Proteobacteria_Alphaproteobacteria_SHVZ01_SHVZ01_SHVZ01_SHVZ01-sp016792585
GB_GCA_016869285_Bacteria	Proteobacteria_Alphaproteobacteria_SHVZ01_SHVZ01_SHVZ01_SHVZ01-sp016869285
GB_GCA_016869375_Bacteria	Proteobacteria_Alphaproteobacteria_SHVZ01_SHVZ01_SHVZ01_SHVZ01-sp016869375
GB_GCA_002428885_Bacteria	Proteobacteria_Alphaproteobacteria_Sneathiellales_Sneathiellaceae_Sneathiella_Sneathiella-sp002428885
GB_GCA_016781555_Bacteria	Proteobacteria_Alphaproteobacteria_Sphingomonadales_Sphingomonadaceae_Allosphingosinicella_Allosphingosinicella-sp016781555
GB_GCA_002715265_Bacteria	Proteobacteria_Alphaproteobacteria_TMED109_TMED109_GCA-002727615_GCA-002727615-sp002715265
GB_GCA_002171375_Bacteria	Proteobacteria_Alphaproteobacteria_TMED109_TMED109_TMED109_TMED109-sp002171375
GB_GCA_002684605_Bacteria	Proteobacteria_Alphaproteobacteria_TMED109_TMED109_TMED109_TMED109-sp002684605
GB_GCA_002720535_Bacteria	Proteobacteria_Alphaproteobacteria_TMED109_TMED109_TMED109_TMED109-sp002720535
GB_GCA_002937655_Bacteria	Proteobacteria_Alphaproteobacteria_TMED109_TMED109_TMED109_TMED109-sp002937655
GB_GCA_002469865_Bacteria	Proteobacteria_Alphaproteobacteria_UBA8317_UBA8317_UBA8317_UBA8317-sp002469865
GB_GCA_016869515_Bacteria	Proteobacteria_Alphaproteobacteria_VGDZ01_VGDZ01_VGDZ01_VGDZ01-sp016869515
GB_GCA_002255365_Bacteria	Proteobacteria_Gammaproteobacteria_21-64-14_21-64-14_21-64-14_21-64-14-sp002255365
GB_GCA_002897735_Bacteria	Proteobacteria_Gammaproteobacteria_21-64-14_21-64-14_BMS3Abin12_BMS3Abin12-sp002897735
RS_GCF_003184265_Bacteria	Proteobacteria_Gammaproteobacteria_Acidiferrobacterales_Acidiferrobacteraceae_Acidiferrobacter_Acidiferrobacter-sp003184265
RS_GCF_003333315_Bacteria	Proteobacteria_Gammaproteobacteria_Acidiferrobacterales_Acidiferrobacteraceae_Acidiferrobacter_Acidiferrobacter-thiooxydans
GB_GCA_003251795_Bacteria	Proteobacteria_Gammaproteobacteria_Acidiferrobacterales_SPGG2_SZUA-472_SZUA-472-sp003251795
GB_GCA_004298065_Bacteria	Proteobacteria_Gammaproteobacteria_Acidiferrobacterales_Sulfurifustaceae_SCRL01_SCRL01-sp004298065
GB_GCA_001304215_Bacteria	Proteobacteria_Gammaproteobacteria_Acidiferrobacterales_Sulfurifustaceae_SM1-46_SM1-46-sp001304215
RS_GCF_002355735_Bacteria	Proteobacteria_Gammaproteobacteria_Acidiferrobacterales_Sulfurifustaceae_Sulfuricaulis_Sulfuricaulis-limicola
GB_GCA_001785195_Bacteria	Proteobacteria_Gammaproteobacteria_Acidiferrobacterales_Sulfurifustaceae_Sulfuricaulis_Sulfuricaulis-sp001785195
GB_GCA_016194665_Bacteria	Proteobacteria_Gammaproteobacteria_Acidiferrobacterales_Sulfurifustaceae_Sulfuricaulis_Sulfuricaulis-sp016194665
RS_GCF_002355415_Bacteria	Proteobacteria_Gammaproteobacteria_Acidiferrobacterales_Sulfurifustaceae_Sulfurifustis_Sulfurifustis-variabilis
GB_GCA_003228915_Bacteria	Proteobacteria_Gammaproteobacteria_Acidiferrobacterales_SZUA-150_SZUA-150_SZUA-150-sp003228915
GB_GCA_002451085_Bacteria	Proteobacteria_Gammaproteobacteria_Acidiferrobacterales_UBA6901_UBA6901_UBA6901-sp002451085
RS_GCF_000175575_Bacteria	Proteobacteria_Gammaproteobacteria_Acidithiobacillales_Acidithiobacillaceae_Acidithiobacillus_A_Acidithiobacillus_A-caldus
RS_GCF_002847505_Bacteria	Proteobacteria_Gammaproteobacteria_Acidithiobacillales_Acidithiobacillaceae_Acidithiobacillus_Acidithiobacillus-sp002847505
RS_GCF_015100155_Bacteria	Proteobacteria_Gammaproteobacteria_Acidithiobacillales_Acidithiobacillaceae_Acidithiobacillus_Acidithiobacillus-sp015100155
RS_GCF_018853445_Bacteria	Proteobacteria_Gammaproteobacteria_Acidithiobacillales_Acidithiobacillaceae_Acidithiobacillus_Acidithiobacillus-sp018853445
RS_GCF_018853465_Bacteria	Proteobacteria_Gammaproteobacteria_Acidithiobacillales_Acidithiobacillaceae_Acidithiobacillus_Acidithiobacillus-sp018853465
RS_GCF_018853815_Bacteria	Proteobacteria_Gammaproteobacteria_Acidithiobacillales_Acidithiobacillaceae_Acidithiobacillus_Acidithiobacillus-sp018853815
RS_GCF_009662475_Bacteria	Proteobacteria_Gammaproteobacteria_Acidithiobacillales_Acidithiobacillaceae_Acidithiobacillus_Acidithiobacillus-thiooxidans
RS_GCF_003721225_Bacteria	Proteobacteria_Gammaproteobacteria_Acidithiobacillales_Acidithiobacillaceae_Acidithiobacillus_B_Acidithiobacillus_B-sulfuriphilus
RS_GCF_018854025_Bacteria	Proteobacteria_Gammaproteobacteria_Acidithiobacillales_Acidithiobacillaceae_UBA2486_UBA2486-sp018854025
RS_GCF_000423825_Bacteria	Proteobacteria_Gammaproteobacteria_Acidithiobacillales_Thermithiobacillaceae_Thermithiobacillus_Thermithiobacillus-tepidarius
RS_GCF_003967195_Bacteria	Proteobacteria_Gammaproteobacteria_AKS1_AKS1_Sulfuriflexus_Sulfuriflexus-mobilis
GB_GCA_002897635_Bacteria	Proteobacteria_Gammaproteobacteria_Arenicellales_BMS3Bbin11_BMS3Bbin11_BMS3Bbin11-sp002897635
GB_GCA_013150915_Bacteria	Proteobacteria_Gammaproteobacteria_Arenicellales_BMS3Bbin11_BMS3Bbin11_BMS3Bbin11-sp013150915
GB_GCA_905478855_Bacteria	Proteobacteria_Gammaproteobacteria_Arenicellales_CAJQKF01_CAJQKF01_CAJQKF01-sp905478855
GB_GCA_011052015_Bacteria	Proteobacteria_Gammaproteobacteria_Arenicellales_HyVt-429_HyVt-429_HyVt-429-sp011052015
GB_GCA_013152415_Bacteria	Proteobacteria_Gammaproteobacteria_Arenicellales_HyVt-429_HyVt-429_HyVt-429-sp013152415
GB_GCA_009842505_Bacteria	Proteobacteria_Gammaproteobacteria_Arenicellales_LS-SOB_VYFG01_VYFG01-sp009842505
GB_GCA_009839585_Bacteria	Proteobacteria_Gammaproteobacteria_Arenicellales_LS-SOB_VYGS01_VYGS01-sp009839585
GB_GCA_009841725_Bacteria	Proteobacteria_Gammaproteobacteria_Arenicellales_LS-SOB_VYGS01_VYGS01-sp009841725
GB_GCA_012103395_Bacteria	Proteobacteria_Gammaproteobacteria_Arenicellales_LS-SOB_WLWV01_WLWV01-sp012103395
GB_GCA_003972845_Bacteria	Proteobacteria_Gammaproteobacteria_Arenicellales_QOAV01_QOAV01_QOAV01-sp003972845
GB_GCA_011052285_Bacteria	Proteobacteria_Gammaproteobacteria_Arenicellales_UBA5680_DRJH01_DRJH01-sp011052285
GB_GCA_002726415_Bacteria	Proteobacteria_Gammaproteobacteria_Arenicellales_UBA868_GCA-2726415_GCA-2726415-sp002726415
GB_GCA_014239255_Bacteria	Proteobacteria_Gammaproteobacteria_Arenicellales_UBA868_GCA-2726415_GCA-2726415-sp014239255
GB_GCA_014239575_Bacteria	Proteobacteria_Gammaproteobacteria_Arenicellales_UBA868_GCA-2726415_GCA-2726415-sp014239575
GB_GCA_018698075_Bacteria	Proteobacteria_Gammaproteobacteria_Arenicellales_UBA868_GCA-2726415_GCA-2726415-sp018698075
GB_GCA_001629395_Bacteria	Proteobacteria_Gammaproteobacteria_Arenicellales_UBA868_REDSEA-S09-B13_REDSEA-S09-B13-sp001629395
GB_GCA_002456995_Bacteria	Proteobacteria_Gammaproteobacteria_Arenicellales_UBA868_REDSEA-S09-B13_REDSEA-S09-B13-sp002456995
GB_GCA_002714255_Bacteria	Proteobacteria_Gammaproteobacteria_Arenicellales_UBA868_UBA11791_UBA11791-sp002714255
GB_GCA_012960345_Bacteria	Proteobacteria_Gammaproteobacteria_Arenicellales_UBA868_UBA11791_UBA11791-sp012960345
GB_GCA_905612355_Bacteria	Proteobacteria_Gammaproteobacteria_Arenicellales_UBA868_UBA11791_UBA11791-sp905612355
GB_GCA_002729195_Bacteria	Proteobacteria_Gammaproteobacteria_Arenicellales_UBA868_UBA12578_UBA12578-sp002729195
GB_GCA_002171735_Bacteria	Proteobacteria_Gammaproteobacteria_Arenicellales_UBA868_UBA868_UBA868-sp002171735
GB_GCA_004212795_Bacteria	Proteobacteria_Gammaproteobacteria_Arenicellales_UBA868_UBA868_UBA868-sp002295285
GB_GCA_002327725_Bacteria	Proteobacteria_Gammaproteobacteria_Arenicellales_UBA868_UBA868_UBA868-sp002327725
GB_GCA_002346525_Bacteria	Proteobacteria_Gammaproteobacteria_Arenicellales_UBA868_UBA868_UBA868-sp002346525
GB_GCA_002477475_Bacteria	Proteobacteria_Gammaproteobacteria_Arenicellales_UBA868_UBA868_UBA868-sp002477475
GB_GCA_002694065_Bacteria	Proteobacteria_Gammaproteobacteria_Arenicellales_UBA868_UBA868_UBA868-sp002694065
GB_GCA_010025385_Bacteria	Proteobacteria_Gammaproteobacteria_Arenicellales_UBA868_UBA868_UBA868-sp010025385
GB_GCA_011523045_Bacteria	Proteobacteria_Gammaproteobacteria_Arenicellales_UBA868_UBA868_UBA868-sp011523045
GB_GCA_016776875_Bacteria	Proteobacteria_Gammaproteobacteria_Arenicellales_UBA868_UBA868_UBA868-sp016776875
GB_GCA_018672825_Bacteria	Proteobacteria_Gammaproteobacteria_Arenicellales_UBA868_UBA868_UBA868-sp018672825
GB_GCA_002718155_Bacteria	Proteobacteria_Gammaproteobacteria_Arenicellales_UBA868_UBA9619_UBA9619-sp002718155
GB_GCA_016745035_Bacteria	Proteobacteria_Gammaproteobacteria_Beggiatoales_Beggiatoaceae_BB2_BB2-sp016745035
GB_GCA_016744475_Bacteria	Proteobacteria_Gammaproteobacteria_Beggiatoales_Beggiatoaceae_BB31_BB31-sp016744475
RS_GCF_012928505_Bacteria	Proteobacteria_Gammaproteobacteria_Burkholderiales_Burkholderiaceae_Achromobacter_Achromobacter-sp012928505
RS_GCF_002192695_Bacteria	Proteobacteria_Gammaproteobacteria_Burkholderiales_Burkholderiaceae_Achromobacter_Achromobacter-xylosoxidans_C
GB_GCA_000244995_Bacteria	Proteobacteria_Gammaproteobacteria_Burkholderiales_Burkholderiaceae_Aquabacterium_A_Aquabacterium_A-sp000244995
RS_GCF_002198735_Bacteria	Proteobacteria_Gammaproteobacteria_Burkholderiales_Burkholderiaceae_Aquabacterium_A_Aquabacterium_A-sp002198735
GB_GCA_010030205_Bacteria	Proteobacteria_Gammaproteobacteria_Burkholderiales_Burkholderiaceae_Aquabacterium_A_Aquabacterium_A-sp010030205
RS_GCF_013266755_Bacteria	Proteobacteria_Gammaproteobacteria_Burkholderiales_Burkholderiaceae_Aquabacterium_A_Aquabacterium_A-terrae
RS_GCF_000430725_Bacteria	Proteobacteria_Gammaproteobacteria_Burkholderiales_Burkholderiaceae_Azohydromonas_Azohydromonas-australica
GB_GCA_014879745_Bacteria	Proteobacteria_Gammaproteobacteria_Burkholderiales_Burkholderiaceae_CAIKUF01_CAIKUF01-sp014879745
GB_GCA_016702655_Bacteria	Proteobacteria_Gammaproteobacteria_Burkholderiales_Burkholderiaceae_CAIKUF01_CAIKUF01-sp016702655
GB_GCA_903830565_Bacteria	Proteobacteria_Gammaproteobacteria_Burkholderiales_Burkholderiaceae_CAIKUF01_CAIKUF01-sp903830565
GB_GCA_903832285_Bacteria	Proteobacteria_Gammaproteobacteria_Burkholderiales_Burkholderiaceae_CAIKVZ01_CAIKVZ01-sp903832285
GB_GCA_903909815_Bacteria	Proteobacteria_Gammaproteobacteria_Burkholderiales_Burkholderiaceae_CAIKVZ01_CAIKVZ01-sp903909815
GB_GCA_014376645_Bacteria	Proteobacteria_Gammaproteobacteria_Burkholderiales_Burkholderiaceae_CAILRJ01_CAILRJ01-sp014376645
GB_GCA_016790475_Bacteria	Proteobacteria_Gammaproteobacteria_Burkholderiales_Burkholderiaceae_CAISIP01_CAISIP01-sp016790475
RS_GCF_000876015_Bacteria	Proteobacteria_Gammaproteobacteria_Burkholderiales_Burkholderiaceae_Cupriavidus_Cupriavidus-basilensis_B
RS_GCF_905397395_Bacteria	Proteobacteria_Gammaproteobacteria_Burkholderiales_Burkholderiaceae_Cupriavidus_Cupriavidus-campinensis
RS_GCF_000196015_Bacteria	Proteobacteria_Gammaproteobacteria_Burkholderiales_Burkholderiaceae_Cupriavidus_Cupriavidus-metallidurans
RS_GCF_009663685_Bacteria	Proteobacteria_Gammaproteobacteria_Burkholderiales_Burkholderiaceae_Cupriavidus_Cupriavidus-necator_C
RS_GCF_008801835_Bacteria	Proteobacteria_Gammaproteobacteria_Burkholderiales_Burkholderiaceae_Cupriavidus_Cupriavidus-pauculus
RS_GCF_002858765_Bacteria	Proteobacteria_Gammaproteobacteria_Burkholderiales_Burkholderiaceae_Cupriavidus_Cupriavidus-pauculus_B
RS_GCF_003854935_Bacteria	Proteobacteria_Gammaproteobacteria_Burkholderiales_Burkholderiaceae_Cupriavidus_Cupriavidus-pauculus_C
RS_GCF_008693385_Bacteria	Proteobacteria_Gammaproteobacteria_Burkholderiales_Burkholderiaceae_Cupriavidus_Cupriavidus-pauculus_D
RS_GCF_905397285_Bacteria	Proteobacteria_Gammaproteobacteria_Burkholderiales_Burkholderiaceae_Cupriavidus_Cupriavidus-plantarum
RS_GCF_001652915_Bacteria	Proteobacteria_Gammaproteobacteria_Burkholderiales_Burkholderiaceae_Cupriavidus_Cupriavidus-sp001652915
RS_GCF_004217045_Bacteria	Proteobacteria_Gammaproteobacteria_Burkholderiales_Burkholderiaceae_Cupriavidus_Cupriavidus-sp004217045
RS_GCF_005503625_Bacteria	Proteobacteria_Gammaproteobacteria_Burkholderiales_Burkholderiaceae_Cupriavidus_Cupriavidus-sp005503625
RS_GCF_018729255_Bacteria	Proteobacteria_Gammaproteobacteria_Burkholderiales_Burkholderiaceae_Cupriavidus_Cupriavidus-sp018729255
RS_GCF_900101625_Bacteria	Proteobacteria_Gammaproteobacteria_Burkholderiales_Burkholderiaceae_Cupriavidus_Cupriavidus-sp900101625
RS_GCF_900104095_Bacteria	Proteobacteria_Gammaproteobacteria_Burkholderiales_Burkholderiaceae_Cupriavidus_Cupriavidus-sp900104095
GB_GCA_011056935_Bacteria	Proteobacteria_Gammaproteobacteria_Burkholderiales_Burkholderiaceae_DSNY01_DSNY01-sp011056935
RS_GCF_011090165_Bacteria	Proteobacteria_Gammaproteobacteria_Burkholderiales_Burkholderiaceae_Duganella_Duganella-aceris
RS_GCF_009674495_Bacteria	Proteobacteria_Gammaproteobacteria_Burkholderiales_Burkholderiaceae_Duganella_Duganella-alba
RS_GCF_004614165_Bacteria	Proteobacteria_Gammaproteobacteria_Burkholderiales_Burkholderiaceae_Duganella_Duganella-callida
RS_GCF_009857605_Bacteria	Proteobacteria_Gammaproteobacteria_Burkholderiales_Burkholderiaceae_Duganella_Duganella-levis
RS_GCF_009857535_Bacteria	Proteobacteria_Gammaproteobacteria_Burkholderiales_Burkholderiaceae_Duganella_Duganella-margarita
RS_GCF_009720825_Bacteria	Proteobacteria_Gammaproteobacteria_Burkholderiales_Burkholderiaceae_Duganella_Duganella-radicis
RS_GCF_009674565_Bacteria	Proteobacteria_Gammaproteobacteria_Burkholderiales_Burkholderiaceae_Duganella_Duganella-rivi
RS_GCF_012849375_Bacteria	Proteobacteria_Gammaproteobacteria_Burkholderiales_Burkholderiaceae_Duganella_Duganella-sp003217375
RS_GCF_009857495_Bacteria	Proteobacteria_Gammaproteobacteria_Burkholderiales_Burkholderiaceae_Duganella_Duganella-sp009857495
RS_GCF_013375995_Bacteria	Proteobacteria_Gammaproteobacteria_Burkholderiales_Burkholderiaceae_Duganella_Duganella-sp013375995
RS_GCF_013376005_Bacteria	Proteobacteria_Gammaproteobacteria_Burkholderiales_Burkholderiaceae_Duganella_Duganella-sp013376005
RS_GCF_017833525_Bacteria	Proteobacteria_Gammaproteobacteria_Burkholderiales_Burkholderiaceae_Duganella_Duganella-sp017833525
RS_GCF_019219065_Bacteria	Proteobacteria_Gammaproteobacteria_Burkholderiales_Burkholderiaceae_Duganella_Duganella-sp019219065
RS_GCF_900100205_Bacteria	Proteobacteria_Gammaproteobacteria_Burkholderiales_Burkholderiaceae_Duganella_Duganella-sp900100205
RS_GCF_900109645_Bacteria	Proteobacteria_Gammaproteobacteria_Burkholderiales_Burkholderiaceae_Duganella_Duganella-sp900109645
RS_GCF_900110275_Bacteria	Proteobacteria_Gammaproteobacteria_Burkholderiales_Burkholderiaceae_Duganella_Duganella-sp900110275
GB_GCA_013823505_Bacteria	Proteobacteria_Gammaproteobacteria_Burkholderiales_Burkholderiaceae_Hydrogenophaga_Hydrogenophaga-sp013823505
GB_GCA_018780385_Bacteria	Proteobacteria_Gammaproteobacteria_Burkholderiales_Burkholderiaceae_Hydrogenophaga_Hydrogenophaga-sp018780385
GB_GCA_002342165_Bacteria	Proteobacteria_Gammaproteobacteria_Burkholderiales_Burkholderiaceae_Hylemonella_Hylemonella-sp002342165
GB_GCA_017856435_Bacteria	Proteobacteria_Gammaproteobacteria_Burkholderiales_Burkholderiaceae_Hylemonella_Hylemonella-sp017856435
GB_GCA_011391155_Bacteria	Proteobacteria_Gammaproteobacteria_Burkholderiales_Burkholderiaceae_JAABQG01_JAABQG01-sp011391155
GB_GCA_013298415_Bacteria	Proteobacteria_Gammaproteobacteria_Burkholderiales_Burkholderiaceae_JAAFHN01_JAAFHN01-sp013298415
GB_GCA_013695705_Bacteria	Proteobacteria_Gammaproteobacteria_Burkholderiales_Burkholderiaceae_JACCZX01_JACCZX01-sp013695705
GB_GCA_016716275_Bacteria	Proteobacteria_Gammaproteobacteria_Burkholderiales_Burkholderiaceae_JADJWR01_JADJWR01-sp016716275
GB_GCA_015075545_Bacteria	Proteobacteria_Gammaproteobacteria_Burkholderiales_Burkholderiaceae_JAEUPI01_JAEUPI01-sp008933545
GB_GCA_015075165_Bacteria	Proteobacteria_Gammaproteobacteria_Burkholderiales_Burkholderiaceae_JAEUPI01_JAEUPI01-sp015075165
GB_GCA_016790175_Bacteria	Proteobacteria_Gammaproteobacteria_Burkholderiales_Burkholderiaceae_JAEUPI01_JAEUPI01-sp016790175
GB_GCA_018241265_Bacteria	Proteobacteria_Gammaproteobacteria_Burkholderiales_Burkholderiaceae_JAFEEF01_JAFEEF01-sp018241265
GB_GCA_012513675_Bacteria	Proteobacteria_Gammaproteobacteria_Burkholderiales_Burkholderiaceae_Lautropia_Lautropia-sp012513675
GB_GCA_903935585_Bacteria	Proteobacteria_Gammaproteobacteria_Burkholderiales_Burkholderiaceae_Limnohabitans_A_Limnohabitans_A-sp903935585
GB_GCA_903842945_Bacteria	Proteobacteria_Gammaproteobacteria_Burkholderiales_Burkholderiaceae_Limnohabitans_Limnohabitans-sp903842945
GB_GCA_903856995_Bacteria	Proteobacteria_Gammaproteobacteria_Burkholderiales_Burkholderiaceae_Limnohabitans_Limnohabitans-sp903856995
GB_GCA_903906635_Bacteria	Proteobacteria_Gammaproteobacteria_Burkholderiales_Burkholderiaceae_Limnohabitans_Limnohabitans-sp903906635
GB_GCA_903933115_Bacteria	Proteobacteria_Gammaproteobacteria_Burkholderiales_Burkholderiaceae_Limnohabitans_Limnohabitans-sp903933115
GB_GCA_903956845_Bacteria	Proteobacteria_Gammaproteobacteria_Burkholderiales_Burkholderiaceae_Limnohabitans_Limnohabitans-sp903956845
RS_GCF_002760665_Bacteria	Proteobacteria_Gammaproteobacteria_Burkholderiales_Burkholderiaceae_Massilia_Massilia-psychrophila
RS_GCF_010499255_Bacteria	Proteobacteria_Gammaproteobacteria_Burkholderiales_Burkholderiaceae_NBD-18_NBD-18-sp003507735
GB_GCA_903865015_Bacteria	Proteobacteria_Gammaproteobacteria_Burkholderiales_Burkholderiaceae_NBD-18_NBD-18-sp903865015
GB_GCA_903903735_Bacteria	Proteobacteria_Gammaproteobacteria_Burkholderiales_Burkholderiaceae_NBD-18_NBD-18-sp903903735
GB_GCA_903929925_Bacteria	Proteobacteria_Gammaproteobacteria_Burkholderiales_Burkholderiaceae_NBD-18_NBD-18-sp903929925
GB_GCA_903932425_Bacteria	Proteobacteria_Gammaproteobacteria_Burkholderiales_Burkholderiaceae_NBD-18_NBD-18-sp903932425
GB_GCA_903958565_Bacteria	Proteobacteria_Gammaproteobacteria_Burkholderiales_Burkholderiaceae_NBD-18_NBD-18-sp903958565
RS_GCF_015352955_Bacteria	Proteobacteria_Gammaproteobacteria_Burkholderiales_Burkholderiaceae_Noviherbaspirillum_A_Noviherbaspirillum_A-soli
RS_GCF_019052805_Bacteria	Proteobacteria_Gammaproteobacteria_Burkholderiales_Burkholderiaceae_Noviherbaspirillum_A_Noviherbaspirillum_A-sp019052805
RS_GCF_008929045_Bacteria	Proteobacteria_Gammaproteobacteria_Burkholderiales_Burkholderiaceae_Noviherbaspirillum_Noviherbaspirillum-aerium
RS_GCF_010974945_Bacteria	Proteobacteria_Gammaproteobacteria_Burkholderiales_Burkholderiaceae_Noviherbaspirillum_Noviherbaspirillum-galbum
RS_GCF_900188095_Bacteria	Proteobacteria_Gammaproteobacteria_Burkholderiales_Burkholderiaceae_Noviherbaspirillum_Noviherbaspirillum-humi
RS_GCF_015352985_Bacteria	Proteobacteria_Gammaproteobacteria_Burkholderiales_Burkholderiaceae_Noviherbaspirillum_Noviherbaspirillum-malthae
RS_GCF_001428545_Bacteria	Proteobacteria_Gammaproteobacteria_Burkholderiales_Burkholderiaceae_Noviherbaspirillum_Noviherbaspirillum-sp001428545
GB_GCA_012927455_Bacteria	Proteobacteria_Gammaproteobacteria_Burkholderiales_Burkholderiaceae_Polaromonas_Polaromonas-sp012927455
GB_GCA_001017435_Bacteria	Proteobacteria_Gammaproteobacteria_Burkholderiales_Burkholderiaceae_Polyangium_A_Polyangium_A-brachysporum
RS_GCF_002206625_Bacteria	Proteobacteria_Gammaproteobacteria_Burkholderiales_Burkholderiaceae_Polynucleobacter_Polynucleobacter-campilacus
RS_GCF_900205755_Bacteria	Proteobacteria_Gammaproteobacteria_Burkholderiales_Burkholderiaceae_Polynucleobacter_Polynucleobacter-meluiroseus
RS_GCF_000019745_Bacteria	Proteobacteria_Gammaproteobacteria_Burkholderiales_Burkholderiaceae_Polynucleobacter_Polynucleobacter-necessarius_D
RS_GCF_900096765_Bacteria	Proteobacteria_Gammaproteobacteria_Burkholderiales_Burkholderiaceae_Polynucleobacter_Polynucleobacter-necessarius_F
RS_GCF_003261235_Bacteria	Proteobacteria_Gammaproteobacteria_Burkholderiales_Burkholderiaceae_Polynucleobacter_Polynucleobacter-paneuropaeus
RS_GCF_003072505_Bacteria	Proteobacteria_Gammaproteobacteria_Burkholderiales_Burkholderiaceae_Polynucleobacter_Polynucleobacter-rarus
GB_GCA_009924985_Bacteria	Proteobacteria_Gammaproteobacteria_Burkholderiales_Burkholderiaceae_Polynucleobacter_Polynucleobacter-sp009924985
RS_GCF_018687555_Bacteria	Proteobacteria_Gammaproteobacteria_Burkholderiales_Burkholderiaceae_Polynucleobacter_Polynucleobacter-sp018687555
RS_GCF_018881595_Bacteria	Proteobacteria_Gammaproteobacteria_Burkholderiales_Burkholderiaceae_Polynucleobacter_Polynucleobacter-sp018881595
RS_GCF_018881975_Bacteria	Proteobacteria_Gammaproteobacteria_Burkholderiales_Burkholderiaceae_Polynucleobacter_Polynucleobacter-sp018881975
RS_GCF_018882215_Bacteria	Proteobacteria_Gammaproteobacteria_Burkholderiales_Burkholderiaceae_Polynucleobacter_Polynucleobacter-sp018882215
RS_GCF_900176405_Bacteria	Proteobacteria_Gammaproteobacteria_Burkholderiales_Burkholderiaceae_Polynucleobacter_Polynucleobacter-sp900176405
GB_GCA_903843235_Bacteria	Proteobacteria_Gammaproteobacteria_Burkholderiales_Burkholderiaceae_Polynucleobacter_Polynucleobacter-sp903843235
GB_GCA_903846025_Bacteria	Proteobacteria_Gammaproteobacteria_Burkholderiales_Burkholderiaceae_Polynucleobacter_Polynucleobacter-sp903846025
GB_GCA_903858445_Bacteria	Proteobacteria_Gammaproteobacteria_Burkholderiales_Burkholderiaceae_Polynucleobacter_Polynucleobacter-sp903858445
GB_GCA_903867305_Bacteria	Proteobacteria_Gammaproteobacteria_Burkholderiales_Burkholderiaceae_Polynucleobacter_Polynucleobacter-sp903867305
GB_GCA_903875135_Bacteria	Proteobacteria_Gammaproteobacteria_Burkholderiales_Burkholderiaceae_Polynucleobacter_Polynucleobacter-sp903875135
GB_GCA_903892315_Bacteria	Proteobacteria_Gammaproteobacteria_Burkholderiales_Burkholderiaceae_Polynucleobacter_Polynucleobacter-sp903892315
GB_GCA_903900805_Bacteria	Proteobacteria_Gammaproteobacteria_Burkholderiales_Burkholderiaceae_Polynucleobacter_Polynucleobacter-sp903900805
GB_GCA_903944255_Bacteria	Proteobacteria_Gammaproteobacteria_Burkholderiales_Burkholderiaceae_Polynucleobacter_Polynucleobacter-sp903944255
RS_GCF_001953355_Bacteria	Proteobacteria_Gammaproteobacteria_Burkholderiales_Burkholderiaceae_Polynucleobacter_Polynucleobacter-sphagniphilus
RS_GCF_001659725_Bacteria	Proteobacteria_Gammaproteobacteria_Burkholderiales_Burkholderiaceae_Polynucleobacter_Polynucleobacter-wuianus
RS_GCF_003028855_Bacteria	Proteobacteria_Gammaproteobacteria_Burkholderiales_Burkholderiaceae_Pseudoduganella_Pseudoduganella-armeniaca
RS_GCF_009727155_Bacteria	Proteobacteria_Gammaproteobacteria_Burkholderiales_Burkholderiaceae_Pseudoduganella_Pseudoduganella-dura
RS_GCF_007830495_Bacteria	Proteobacteria_Gammaproteobacteria_Burkholderiales_Burkholderiaceae_Pseudoduganella_Pseudoduganella-flava
RS_GCF_009857475_Bacteria	Proteobacteria_Gammaproteobacteria_Burkholderiales_Burkholderiaceae_Pseudoduganella_Pseudoduganella-guangdongensis
GB_GCA_008011715_Bacteria	Proteobacteria_Gammaproteobacteria_Burkholderiales_Burkholderiaceae_Pseudoduganella_Pseudoduganella-haloabium
RS_GCF_004209755_Bacteria	Proteobacteria_Gammaproteobacteria_Burkholderiales_Burkholderiaceae_Pseudoduganella_Pseudoduganella-lutea
RS_GCF_900116645_Bacteria	Proteobacteria_Gammaproteobacteria_Burkholderiales_Burkholderiaceae_Pseudoduganella_Pseudoduganella-namucuonensis
RS_GCF_004421005_Bacteria	Proteobacteria_Gammaproteobacteria_Burkholderiales_Burkholderiaceae_Pseudoduganella_Pseudoduganella-plicata
RS_GCF_001425005_Bacteria	Proteobacteria_Gammaproteobacteria_Burkholderiales_Burkholderiaceae_Pseudoduganella_Pseudoduganella-sp001425005
RS_GCF_001427305_Bacteria	Proteobacteria_Gammaproteobacteria_Burkholderiales_Burkholderiaceae_Pseudoduganella_Pseudoduganella-sp001427305
GB_GCA_002454505_Bacteria	Proteobacteria_Gammaproteobacteria_Burkholderiales_Burkholderiaceae_Pseudoduganella_Pseudoduganella-sp002454505
RS_GCF_004217275_Bacteria	Proteobacteria_Gammaproteobacteria_Burkholderiales_Burkholderiaceae_Pseudoduganella_Pseudoduganella-sp004217275
RS_GCF_009674485_Bacteria	Proteobacteria_Gammaproteobacteria_Burkholderiales_Burkholderiaceae_Pseudoduganella_Pseudoduganella-sp009674485
RS_GCF_900113115_Bacteria	Proteobacteria_Gammaproteobacteria_Burkholderiales_Burkholderiaceae_Pseudoduganella_Pseudoduganella-sp900113115
RS_GCF_014192225_Bacteria	Proteobacteria_Gammaproteobacteria_Burkholderiales_Burkholderiaceae_Pseudoduganella_Pseudoduganella-umbonata
RS_GCF_014652235_Bacteria	Proteobacteria_Gammaproteobacteria_Burkholderiales_Burkholderiaceae_Pseudorhodoferax_Pseudorhodoferax-aquiterrae
RS_GCF_007677875_Bacteria	Proteobacteria_Gammaproteobacteria_Burkholderiales_Burkholderiaceae_Pseudorhodoferax_Pseudorhodoferax-boronicumulans_A
RS_GCF_001422445_Bacteria	Proteobacteria_Gammaproteobacteria_Burkholderiales_Burkholderiaceae_Pseudorhodoferax_Pseudorhodoferax-sp001422445
RS_GCF_006386545_Bacteria	Proteobacteria_Gammaproteobacteria_Burkholderiales_Burkholderiaceae_Pseudorivibacter_Pseudorivibacter-rhizosphaerae
RS_GCF_008801405_Bacteria	Proteobacteria_Gammaproteobacteria_Burkholderiales_Burkholderiaceae_Ralstonia_Ralstonia-insidiosa
RS_GCF_905397375_Bacteria	Proteobacteria_Gammaproteobacteria_Burkholderiales_Burkholderiaceae_Ralstonia_Ralstonia-mannitolilytica
RS_GCF_016466415_Bacteria	Proteobacteria_Gammaproteobacteria_Burkholderiales_Burkholderiaceae_Ralstonia_Ralstonia-pickettii
RS_GCF_000607165_Bacteria	Proteobacteria_Gammaproteobacteria_Burkholderiales_Burkholderiaceae_Ralstonia_Ralstonia-pickettii_A
RS_GCF_000020205_Bacteria	Proteobacteria_Gammaproteobacteria_Burkholderiales_Burkholderiaceae_Ralstonia_Ralstonia-pickettii_B
RS_GCF_003999715_Bacteria	Proteobacteria_Gammaproteobacteria_Burkholderiales_Burkholderiaceae_Ralstonia_Ralstonia-pseudosolanacearum
RS_GCF_002251695_Bacteria	Proteobacteria_Gammaproteobacteria_Burkholderiales_Burkholderiaceae_Ralstonia_Ralstonia-solanacearum
RS_GCF_000620465_Bacteria	Proteobacteria_Gammaproteobacteria_Burkholderiales_Burkholderiaceae_Ralstonia_Ralstonia-sp000620465
RS_GCF_000801955_Bacteria	Proteobacteria_Gammaproteobacteria_Burkholderiales_Burkholderiaceae_Ralstonia_Ralstonia-sp000801955
GB_GCA_000955795_Bacteria	Proteobacteria_Gammaproteobacteria_Burkholderiales_Burkholderiaceae_Ralstonia_Ralstonia-sp000955795
RS_GCF_001078575_Bacteria	Proteobacteria_Gammaproteobacteria_Burkholderiales_Burkholderiaceae_Ralstonia_Ralstonia-sp001078575
GB_GCA_002298975_Bacteria	Proteobacteria_Gammaproteobacteria_Burkholderiales_Burkholderiaceae_Ralstonia_Ralstonia-sp002298975
RS_GCF_003851545_Bacteria	Proteobacteria_Gammaproteobacteria_Burkholderiales_Burkholderiaceae_Ralstonia_Ralstonia-sp003851545
RS_GCF_007997035_Bacteria	Proteobacteria_Gammaproteobacteria_Burkholderiales_Burkholderiaceae_Ralstonia_Ralstonia-sp007997035
RS_GCF_016429285_Bacteria	Proteobacteria_Gammaproteobacteria_Burkholderiales_Burkholderiaceae_Ralstonia_Ralstonia-sp016429285
RS_GCF_016743075_Bacteria	Proteobacteria_Gammaproteobacteria_Burkholderiales_Burkholderiaceae_Ralstonia_Ralstonia-syzygii
RS_GCF_016722765_Bacteria	Proteobacteria_Gammaproteobacteria_Burkholderiales_Burkholderiaceae_Ramlibacter_Ramlibacter-alkalitolerans
RS_GCF_016722785_Bacteria	Proteobacteria_Gammaproteobacteria_Burkholderiales_Burkholderiaceae_Ramlibacter_Ramlibacter-monticola
RS_GCF_013087525_Bacteria	Proteobacteria_Gammaproteobacteria_Burkholderiales_Burkholderiaceae_Ramlibacter_Ramlibacter-sp013087525
GB_GCA_013697775_Bacteria	Proteobacteria_Gammaproteobacteria_Burkholderiales_Burkholderiaceae_Ramlibacter_Ramlibacter-sp013697775
RS_GCF_013778345_Bacteria	Proteobacteria_Gammaproteobacteria_Burkholderiales_Burkholderiaceae_Ramlibacter_Ramlibacter-sp013778345
GB_GCA_009921245_Bacteria	Proteobacteria_Gammaproteobacteria_Burkholderiales_Burkholderiaceae_RFXW01_RFXW01-sp009921245
RS_GCF_000799305_Bacteria	Proteobacteria_Gammaproteobacteria_Burkholderiales_Burkholderiaceae_Rhizobacter_Rhizobacter-sp000799305
RS_GCF_000799605_Bacteria	Proteobacteria_Gammaproteobacteria_Burkholderiales_Burkholderiaceae_Rhizobacter_Rhizobacter-sp000799605
RS_GCF_000800095_Bacteria	Proteobacteria_Gammaproteobacteria_Burkholderiales_Burkholderiaceae_Rhizobacter_Rhizobacter-sp000800095
RS_GCF_001425825_Bacteria	Proteobacteria_Gammaproteobacteria_Burkholderiales_Burkholderiaceae_Rhizobacter_Rhizobacter-sp001425825
RS_GCF_012275445_Bacteria	Proteobacteria_Gammaproteobacteria_Burkholderiales_Burkholderiaceae_Rhizobacter_Rhizobacter-sp012275445
RS_GCF_012932665_Bacteria	Proteobacteria_Gammaproteobacteria_Burkholderiales_Burkholderiaceae_Rhizobacter_Rhizobacter-sp012932665
GB_GCA_014379885_Bacteria	Proteobacteria_Gammaproteobacteria_Burkholderiales_Burkholderiaceae_Rhizobacter_Rhizobacter-sp014379885
GB_GCA_014380155_Bacteria	Proteobacteria_Gammaproteobacteria_Burkholderiales_Burkholderiaceae_Rhizobacter_Rhizobacter-sp014380155
RS_GCF_016735515_Bacteria	Proteobacteria_Gammaproteobacteria_Burkholderiales_Burkholderiaceae_Rhizobacter_Rhizobacter-sp016735515
RS_GCF_900142965_Bacteria	Proteobacteria_Gammaproteobacteria_Burkholderiales_Burkholderiaceae_Rhizobacter_Rhizobacter-sp900142965
RS_GCF_006970865_Bacteria	Proteobacteria_Gammaproteobacteria_Burkholderiales_Burkholderiaceae_Rhodoferax_A_Rhodoferax_A-sediminis
RS_GCF_002002705_Bacteria	Proteobacteria_Gammaproteobacteria_Burkholderiales_Burkholderiaceae_Rhodoferax_A_Rhodoferax_A-sp002002705
GB_GCA_004323695_Bacteria	Proteobacteria_Gammaproteobacteria_Burkholderiales_Burkholderiaceae_Rhodoferax_A_Rhodoferax_A-sp004323695
GB_GCA_007280205_Bacteria	Proteobacteria_Gammaproteobacteria_Burkholderiales_Burkholderiaceae_Rhodoferax_Rhodoferax-sp007280205
GB_GCA_017880985_Bacteria	Proteobacteria_Gammaproteobacteria_Burkholderiales_Burkholderiaceae_Rhodoferax_Rhodoferax-sp017880985
GB_GCA_903839085_Bacteria	Proteobacteria_Gammaproteobacteria_Burkholderiales_Burkholderiaceae_Rhodoferax_Rhodoferax-sp903839085
GB_GCA_903870065_Bacteria	Proteobacteria_Gammaproteobacteria_Burkholderiales_Burkholderiaceae_Rhodoferax_Rhodoferax-sp903870065
GB_GCA_903886165_Bacteria	Proteobacteria_Gammaproteobacteria_Burkholderiales_Burkholderiaceae_Rhodoferax_Rhodoferax-sp903886165
GB_GCA_903914985_Bacteria	Proteobacteria_Gammaproteobacteria_Burkholderiales_Burkholderiaceae_Rhodoferax_Rhodoferax-sp903914985
GB_GCA_903930255_Bacteria	Proteobacteria_Gammaproteobacteria_Burkholderiales_Burkholderiaceae_Rhodoferax_Rhodoferax-sp903930255
GB_GCA_903958915_Bacteria	Proteobacteria_Gammaproteobacteria_Burkholderiales_Burkholderiaceae_Rhodoferax_Rhodoferax-sp903958915
RS_GCF_004016505_Bacteria	Proteobacteria_Gammaproteobacteria_Burkholderiales_Burkholderiaceae_Rubrivivax_Rubrivivax-rivuli
GB_GCA_001464055_Bacteria	Proteobacteria_Gammaproteobacteria_Burkholderiales_Burkholderiaceae_Rubrivivax_Rubrivivax-sp001464055
GB_GCA_016191995_Bacteria	Proteobacteria_Gammaproteobacteria_Burkholderiales_Burkholderiaceae_Rubrivivax_Rubrivivax-sp016191995
GB_GCA_016223165_Bacteria	Proteobacteria_Gammaproteobacteria_Burkholderiales_Burkholderiaceae_Rubrivivax_Rubrivivax-sp016223165
GB_GCA_016709385_Bacteria	Proteobacteria_Gammaproteobacteria_Burkholderiales_Burkholderiaceae_Rubrivivax_Rubrivivax-sp016709385
GB_GCA_016716535_Bacteria	Proteobacteria_Gammaproteobacteria_Burkholderiales_Burkholderiaceae_Rubrivivax_Rubrivivax-sp016716535
GB_GCA_016788525_Bacteria	Proteobacteria_Gammaproteobacteria_Burkholderiales_Burkholderiaceae_Rubrivivax_Rubrivivax-sp016788525
GB_GCA_016789865_Bacteria	Proteobacteria_Gammaproteobacteria_Burkholderiales_Burkholderiaceae_Rubrivivax_Rubrivivax-sp016789865
GB_GCA_017302495_Bacteria	Proteobacteria_Gammaproteobacteria_Burkholderiales_Burkholderiaceae_Rubrivivax_Rubrivivax-sp017302495
GB_GCA_017302505_Bacteria	Proteobacteria_Gammaproteobacteria_Burkholderiales_Burkholderiaceae_Rubrivivax_Rubrivivax-sp017302505
GB_GCA_018241895_Bacteria	Proteobacteria_Gammaproteobacteria_Burkholderiales_Burkholderiaceae_Rubrivivax_Rubrivivax-sp018241895
GB_GCA_018261815_Bacteria	Proteobacteria_Gammaproteobacteria_Burkholderiales_Burkholderiaceae_Rubrivivax_Rubrivivax-sp018261815
RS_GCF_904426505_Bacteria	Proteobacteria_Gammaproteobacteria_Burkholderiales_Burkholderiaceae_Rubrivivax_Rubrivivax-sp904426505
GB_GCA_001724855_Bacteria	Proteobacteria_Gammaproteobacteria_Burkholderiales_Burkholderiaceae_SCN-69-89_SCN-69-89-sp001724855
GB_GCA_003577305_Bacteria	Proteobacteria_Gammaproteobacteria_Burkholderiales_Burkholderiaceae_SCN-69-89_SCN-69-89-sp003577305
GB_GCA_018969885_Bacteria	Proteobacteria_Gammaproteobacteria_Burkholderiales_Burkholderiaceae_SYIM01_SYIM01-sp018969885
GB_GCA_002386465_Bacteria	Proteobacteria_Gammaproteobacteria_Burkholderiales_Burkholderiaceae_UBA4615_UBA4615-sp002386465
GB_GCA_003818495_Bacteria	Proteobacteria_Gammaproteobacteria_Burkholderiales_Burkholderiaceae_UBA4615_UBA4615-sp003818495
GB_GCA_903831925_Bacteria	Proteobacteria_Gammaproteobacteria_Burkholderiales_Burkholderiaceae_UBA4615_UBA4615-sp903831925
GB_GCA_903898725_Bacteria	Proteobacteria_Gammaproteobacteria_Burkholderiales_Burkholderiaceae_UBA4615_UBA4615-sp903898725
GB_GCA_903903975_Bacteria	Proteobacteria_Gammaproteobacteria_Burkholderiales_Burkholderiaceae_UBA4615_UBA4615-sp903903975
GB_GCA_013287275_Bacteria	Proteobacteria_Gammaproteobacteria_Burkholderiales_Burkholderiaceae_Undibacterium_Undibacterium-sp013287275
GB_GCA_005882215_Bacteria	Proteobacteria_Gammaproteobacteria_Burkholderiales_Burkholderiaceae_VBCK01_VBCK01-sp005882215
GB_GCA_019236735_Bacteria	Proteobacteria_Gammaproteobacteria_Burkholderiales_Burkholderiaceae_VBCK01_VBCK01-sp019236735
GB_GCA_013298045_Bacteria	Proteobacteria_Gammaproteobacteria_Burkholderiales_Casimicrobiaceae_Casimicrobium_Casimicrobium-sp013298045
GB_GCA_003153475_Bacteria	Proteobacteria_Gammaproteobacteria_Burkholderiales_Casimicrobiaceae_PALSA-1003_PALSA-1003-sp003153475
GB_GCA_005882995_Bacteria	Proteobacteria_Gammaproteobacteria_Burkholderiales_Casimicrobiaceae_PALSA-1003_PALSA-1003-sp005882995
GB_GCA_005883655_Bacteria	Proteobacteria_Gammaproteobacteria_Burkholderiales_Casimicrobiaceae_PALSA-1003_PALSA-1003-sp005883655
GB_GCA_005888955_Bacteria	Proteobacteria_Gammaproteobacteria_Burkholderiales_Casimicrobiaceae_PALSA-1003_PALSA-1003-sp005888955
GB_GCA_005889025_Bacteria	Proteobacteria_Gammaproteobacteria_Burkholderiales_Casimicrobiaceae_PALSA-1003_PALSA-1003-sp005889025
GB_GCA_003153335_Bacteria	Proteobacteria_Gammaproteobacteria_Burkholderiales_Casimicrobiaceae_PALSA-1005_PALSA-1005-sp003153335
GB_GCA_016717855_Bacteria	Proteobacteria_Gammaproteobacteria_Burkholderiales_Casimicrobiaceae_PALSA-1005_PALSA-1005-sp016717855
GB_GCA_015075645_Bacteria	Proteobacteria_Gammaproteobacteria_Burkholderiales_Casimicrobiaceae_VBCG01_VBCG01-sp015075645
GB_GCA_905339295_Bacteria	Proteobacteria_Gammaproteobacteria_Burkholderiales_Casimicrobiaceae_VBCG01_VBCG01-sp905339295
GB_GCA_903905585_Bacteria	Proteobacteria_Gammaproteobacteria_Burkholderiales_Ferrovaceae_CAIVHB01_CAIVHB01-sp903905585
GB_GCA_001464695_Bacteria	Proteobacteria_Gammaproteobacteria_Burkholderiales_Ga0077523_Ga0077523_Ga0077523-sp001464695
GB_GCA_001464765_Bacteria	Proteobacteria_Gammaproteobacteria_Burkholderiales_Ga0077523_Ga0077526_Ga0077526-sp001464765
GB_GCA_001464895_Bacteria	Proteobacteria_Gammaproteobacteria_Burkholderiales_Ga0077523_Ga0077526_Ga0077526-sp001464895
GB_GCA_016125475_Bacteria	Proteobacteria_Gammaproteobacteria_Burkholderiales_Ga0077523_Ga0077526_Ga0077526-sp016125475
GB_GCA_016713305_Bacteria	Proteobacteria_Gammaproteobacteria_Burkholderiales_Ga0077523_Ga0077526_Ga0077526-sp016713305
GB_GCA_903873725_Bacteria	Proteobacteria_Gammaproteobacteria_Burkholderiales_Gallionellaceae_CAITJF01_CAITJF01-sp903873725
GB_GCA_002403995_Bacteria	Proteobacteria_Gammaproteobacteria_Burkholderiales_Gallionellaceae_Gallionella_Gallionella-sp002403995
GB_GCA_002414205_Bacteria	Proteobacteria_Gammaproteobacteria_Burkholderiales_Gallionellaceae_Gallionella_Gallionella-sp002414205
GB_GCA_016195965_Bacteria	Proteobacteria_Gammaproteobacteria_Burkholderiales_Gallionellaceae_Gallionella_Gallionella-sp016195965
GB_GCA_017880945_Bacteria	Proteobacteria_Gammaproteobacteria_Burkholderiales_Gallionellaceae_Gallionella_Gallionella-sp017880945
GB_GCA_903876685_Bacteria	Proteobacteria_Gammaproteobacteria_Burkholderiales_Gallionellaceae_Gallionella_Gallionella-sp903876685
GB_GCA_903885165_Bacteria	Proteobacteria_Gammaproteobacteria_Burkholderiales_Gallionellaceae_Gallionella_Gallionella-sp903885165
GB_GCA_903876625_Bacteria	Proteobacteria_Gammaproteobacteria_Burkholderiales_Gallionellaceae_PALSA-1006_PALSA-1006-sp903876625
GB_GCA_903913145_Bacteria	Proteobacteria_Gammaproteobacteria_Burkholderiales_Gallionellaceae_PALSA-1006_PALSA-1006-sp903913145
RS_GCF_000025705_Bacteria	Proteobacteria_Gammaproteobacteria_Burkholderiales_Gallionellaceae_Sideroxydans_Sideroxydans-lithotrophicus
GB_GCA_006218055_Bacteria	Proteobacteria_Gammaproteobacteria_Burkholderiales_Gallionellaceae_Sideroxydans_Sideroxydans-sp006218055
GB_GCA_011620315_Bacteria	Proteobacteria_Gammaproteobacteria_Burkholderiales_Gallionellaceae_Sideroxydans_Sideroxydans-sp011620315
GB_GCA_013791855_Bacteria	Proteobacteria_Gammaproteobacteria_Burkholderiales_Gallionellaceae_Sideroxydans_Sideroxydans-sp013791855
GB_GCA_016208015_Bacteria	Proteobacteria_Gammaproteobacteria_Burkholderiales_Gallionellaceae_Sideroxydans_Sideroxydans-sp016208015
GB_GCA_016214695_Bacteria	Proteobacteria_Gammaproteobacteria_Burkholderiales_Gallionellaceae_Sideroxydans_Sideroxydans-sp016214695
GB_GCA_016235045_Bacteria	Proteobacteria_Gammaproteobacteria_Burkholderiales_Gallionellaceae_Sideroxydans_Sideroxydans-sp016235045
GB_GCA_018813765_Bacteria	Proteobacteria_Gammaproteobacteria_Burkholderiales_Gallionellaceae_Sideroxydans_Sideroxydans-sp018813765
GB_GCA_018814405_Bacteria	Proteobacteria_Gammaproteobacteria_Burkholderiales_Gallionellaceae_Sideroxydans_Sideroxydans-sp018814405
GB_GCA_018819205_Bacteria	Proteobacteria_Gammaproteobacteria_Burkholderiales_Gallionellaceae_Sideroxydans_Sideroxydans-sp018819205
GB_GCA_018820925_Bacteria	Proteobacteria_Gammaproteobacteria_Burkholderiales_Gallionellaceae_Sideroxydans_Sideroxydans-sp018820925
GB_GCA_903847155_Bacteria	Proteobacteria_Gammaproteobacteria_Burkholderiales_Gallionellaceae_Sideroxydans_Sideroxydans-sp903847155
GB_GCA_001770235_Bacteria	Proteobacteria_Gammaproteobacteria_Burkholderiales_RBG-16-58-11_RBG-16-58-11_RBG-16-58-11-sp001770235
GB_GCA_016235775_Bacteria	Proteobacteria_Gammaproteobacteria_Burkholderiales_RBG-16-58-11_RBG-16-58-11_RBG-16-58-11-sp016235775
GB_GCA_018781585_Bacteria	Proteobacteria_Gammaproteobacteria_Burkholderiales_RBG-16-58-11_RBG-16-58-11_RBG-16-58-11-sp018781585
RS_GCF_004361735_Bacteria	Proteobacteria_Gammaproteobacteria_Burkholderiales_Rhodocyclaceae_Azoarcus_Azoarcus-indigens
RS_GCF_012911025_Bacteria	Proteobacteria_Gammaproteobacteria_Burkholderiales_Rhodocyclaceae_Azoarcus_Azoarcus-sp012911025
GB_GCA_903888645_Bacteria	Proteobacteria_Gammaproteobacteria_Burkholderiales_Rhodocyclaceae_CAISUK01_CAISUK01-sp903888645
GB_GCA_903832735_Bacteria	Proteobacteria_Gammaproteobacteria_Burkholderiales_Rhodocyclaceae_CAIYYX01_CAIYYX01-sp903832735
GB_GCA_903904605_Bacteria	Proteobacteria_Gammaproteobacteria_Burkholderiales_Rhodocyclaceae_CAIYYX01_CAIYYX01-sp903904605
GB_GCA_903930535_Bacteria	Proteobacteria_Gammaproteobacteria_Burkholderiales_Rhodocyclaceae_CAIYYX01_CAIYYX01-sp903930535
GB_GCA_001872285_Bacteria	Proteobacteria_Gammaproteobacteria_Burkholderiales_Rhodocyclaceae_CG2-30-68-42_CG2-30-68-42-sp001872285
GB_GCA_017347485_Bacteria	Proteobacteria_Gammaproteobacteria_Burkholderiales_Rhodocyclaceae_Desulfobacillus_Desulfobacillus-denitrificans
GB_GCA_002840845_Bacteria	Proteobacteria_Gammaproteobacteria_Burkholderiales_Rhodocyclaceae_Desulfobacillus_Desulfobacillus-sp002840845
GB_GCA_003105015_Bacteria	Proteobacteria_Gammaproteobacteria_Burkholderiales_Rhodocyclaceae_Desulfobacillus_Desulfobacillus-sp003105015
GB_GCA_008933825_Bacteria	Proteobacteria_Gammaproteobacteria_Burkholderiales_Rhodocyclaceae_Desulfobacillus_Desulfobacillus-sp008933825
GB_GCA_016214145_Bacteria	Proteobacteria_Gammaproteobacteria_Burkholderiales_Rhodocyclaceae_Desulfobacillus_Desulfobacillus-sp016214145
GB_GCA_016703785_Bacteria	Proteobacteria_Gammaproteobacteria_Burkholderiales_Rhodocyclaceae_Desulfobacillus_Desulfobacillus-sp016703785
GB_GCA_016791205_Bacteria	Proteobacteria_Gammaproteobacteria_Burkholderiales_Rhodocyclaceae_Desulfobacillus_Desulfobacillus-sp016791205
GB_GCA_016880375_Bacteria	Proteobacteria_Gammaproteobacteria_Burkholderiales_Rhodocyclaceae_Desulfobacillus_Desulfobacillus-sp016880375
GB_GCA_018262775_Bacteria	Proteobacteria_Gammaproteobacteria_Burkholderiales_Rhodocyclaceae_Desulfobacillus_Desulfobacillus-sp018262775
GB_GCA_018262875_Bacteria	Proteobacteria_Gammaproteobacteria_Burkholderiales_Rhodocyclaceae_Desulfobacillus_Desulfobacillus-sp018262875
GB_GCA_003157035_Bacteria	Proteobacteria_Gammaproteobacteria_Burkholderiales_Rhodocyclaceae_Fen-999_Fen-999-sp003157035
GB_GCA_016704145_Bacteria	Proteobacteria_Gammaproteobacteria_Burkholderiales_Rhodocyclaceae_Fen-999_Fen-999-sp016704145
GB_GCA_018819515_Bacteria	Proteobacteria_Gammaproteobacteria_Burkholderiales_Rhodocyclaceae_Fen-999_Fen-999-sp018819515
GB_GCA_019136545_Bacteria	Proteobacteria_Gammaproteobacteria_Burkholderiales_Rhodocyclaceae_Fen-999_Fen-999-sp019136545
GB_GCA_016208425_Bacteria	Proteobacteria_Gammaproteobacteria_Burkholderiales_Rhodocyclaceae_JACQYA01_JACQYA01-sp016208425
GB_GCA_016194935_Bacteria	Proteobacteria_Gammaproteobacteria_Burkholderiales_Rhodocyclaceae_JACRAR01_JACRAR01-sp016194935
GB_GCA_016214175_Bacteria	Proteobacteria_Gammaproteobacteria_Burkholderiales_Rhodocyclaceae_JACRPB01_JACRPB01-sp016214175
GB_GCA_016791145_Bacteria	Proteobacteria_Gammaproteobacteria_Burkholderiales_Rhodocyclaceae_JAEUNJ01_JAEUNJ01-sp016791145
GB_GCA_016791115_Bacteria	Proteobacteria_Gammaproteobacteria_Burkholderiales_Rhodocyclaceae_JAEUNL01_JAEUNL01-sp016791115
GB_GCA_018261935_Bacteria	Proteobacteria_Gammaproteobacteria_Burkholderiales_Rhodocyclaceae_JAGTRP01_JAGTRP01-sp018261935
GB_GCA_013821865_Bacteria	Proteobacteria_Gammaproteobacteria_Burkholderiales_Rhodocyclaceae_PNJM01_PNJM01-sp013821865
RS_GCF_003865015_Bacteria	Proteobacteria_Gammaproteobacteria_Burkholderiales_Rhodocyclaceae_Sulfurisoma_Sulfurisoma-sediminicola
GB_GCA_018825305_Bacteria	Proteobacteria_Gammaproteobacteria_Burkholderiales_Rhodocyclaceae_Sulfurisoma_Sulfurisoma-sp018825305
RS_GCF_000828635_Bacteria	Proteobacteria_Gammaproteobacteria_Burkholderiales_Rhodocyclaceae_Sulfuritalea_Sulfuritalea-hydrogenivorans
GB_GCA_001828935_Bacteria	Proteobacteria_Gammaproteobacteria_Burkholderiales_Rhodocyclaceae_Sulfuritalea_Sulfuritalea-sp001828935
GB_GCA_006218025_Bacteria	Proteobacteria_Gammaproteobacteria_Burkholderiales_Rhodocyclaceae_Sulfuritalea_Sulfuritalea-sp006218025
GB_GCA_012026675_Bacteria	Proteobacteria_Gammaproteobacteria_Burkholderiales_Rhodocyclaceae_Sulfuritalea_Sulfuritalea-sp012026675
GB_GCA_016192435_Bacteria	Proteobacteria_Gammaproteobacteria_Burkholderiales_Rhodocyclaceae_Sulfuritalea_Sulfuritalea-sp016192435
GB_GCA_016215645_Bacteria	Proteobacteria_Gammaproteobacteria_Burkholderiales_Rhodocyclaceae_Sulfuritalea_Sulfuritalea-sp016215645
GB_GCA_016235165_Bacteria	Proteobacteria_Gammaproteobacteria_Burkholderiales_Rhodocyclaceae_Sulfuritalea_Sulfuritalea-sp016235165
GB_GCA_016235805_Bacteria	Proteobacteria_Gammaproteobacteria_Burkholderiales_Rhodocyclaceae_Sulfuritalea_Sulfuritalea-sp016235805
GB_GCA_016708585_Bacteria	Proteobacteria_Gammaproteobacteria_Burkholderiales_Rhodocyclaceae_Sulfuritalea_Sulfuritalea-sp016708585
GB_GCA_016710465_Bacteria	Proteobacteria_Gammaproteobacteria_Burkholderiales_Rhodocyclaceae_Sulfuritalea_Sulfuritalea-sp016710465
GB_GCA_016712985_Bacteria	Proteobacteria_Gammaproteobacteria_Burkholderiales_Rhodocyclaceae_Sulfuritalea_Sulfuritalea-sp016712985
GB_GCA_016716965_Bacteria	Proteobacteria_Gammaproteobacteria_Burkholderiales_Rhodocyclaceae_Sulfuritalea_Sulfuritalea-sp016716965
GB_GCA_017302275_Bacteria	Proteobacteria_Gammaproteobacteria_Burkholderiales_Rhodocyclaceae_Sulfuritalea_Sulfuritalea-sp017302275
GB_GCA_903848955_Bacteria	Proteobacteria_Gammaproteobacteria_Burkholderiales_Rhodocyclaceae_Sulfuritalea_Sulfuritalea-sp903848955
GB_GCA_903908065_Bacteria	Proteobacteria_Gammaproteobacteria_Burkholderiales_Rhodocyclaceae_Sulfuritalea_Sulfuritalea-sp903908065
GB_GCA_903933395_Bacteria	Proteobacteria_Gammaproteobacteria_Burkholderiales_Rhodocyclaceae_Sulfuritalea_Sulfuritalea-sp903933395
GB_GCA_903959855_Bacteria	Proteobacteria_Gammaproteobacteria_Burkholderiales_Rhodocyclaceae_Sulfuritalea_Sulfuritalea-sp903959855
GB_GCA_002347285_Bacteria	Proteobacteria_Gammaproteobacteria_Burkholderiales_Rhodocyclaceae_UBA2250_UBA2250-sp002347285
GB_GCA_003966565_Bacteria	Proteobacteria_Gammaproteobacteria_Burkholderiales_Rhodocyclaceae_UBA2250_UBA2250-sp003966565
GB_GCA_004323595_Bacteria	Proteobacteria_Gammaproteobacteria_Burkholderiales_Rhodocyclaceae_UBA2250_UBA2250-sp004323595
GB_GCA_011391215_Bacteria	Proteobacteria_Gammaproteobacteria_Burkholderiales_Rhodocyclaceae_UBA2250_UBA2250-sp011391215
GB_GCA_013426785_Bacteria	Proteobacteria_Gammaproteobacteria_Burkholderiales_Rhodocyclaceae_UBA2250_UBA2250-sp013426785
GB_GCA_018333815_Bacteria	Proteobacteria_Gammaproteobacteria_Burkholderiales_Rhodocyclaceae_UBA2250_UBA2250-sp018333815
GB_GCA_903930805_Bacteria	Proteobacteria_Gammaproteobacteria_Burkholderiales_Rhodocyclaceae_UBA2250_UBA2250-sp903930805
GB_GCA_903950295_Bacteria	Proteobacteria_Gammaproteobacteria_Burkholderiales_Rhodocyclaceae_UBA2250_UBA2250-sp903950295
GB_GCA_001770355_Bacteria	Proteobacteria_Gammaproteobacteria_Burkholderiales_SG8-39_2-02-FULL-62-17_2-02-FULL-62-17-sp001770355
GB_GCA_903859155_Bacteria	Proteobacteria_Gammaproteobacteria_Burkholderiales_SG8-39_2-02-FULL-62-17_2-02-FULL-62-17-sp903859155
[truncated: 447 more rows]

## Sheet: Truncated Sox, plus SoxR
Species containing the truncated Sox system plus SoxR
[truncated: 99 more rows]
